# Supplementary material for: Applying Proteomics and Computational Approaches to Identify Novel Targets in Blast-Associated Post-Traumatic Epilepsy
Source: MDPI journal article supplement (doi:10.3390/ijms25052880), 2024-03-01
Supplement: s1 [file s1]

## Supplementary Materials

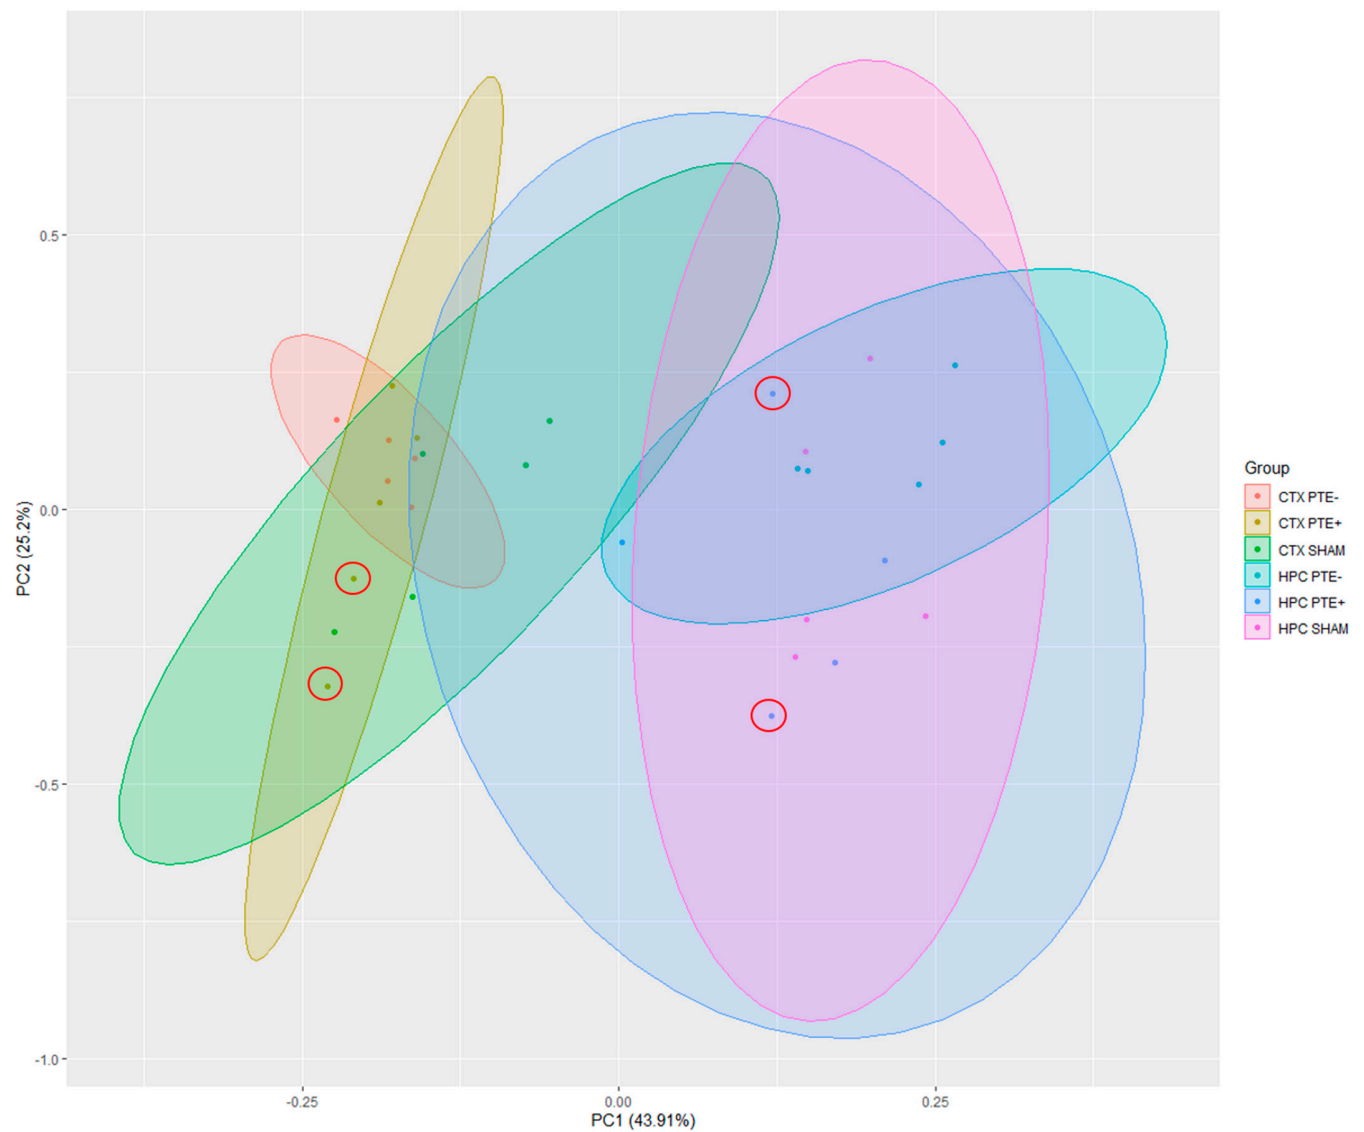

**Supplemental Figure S1:** PCA analysis of cortical and hippocampal sham, PTE<sup>+</sup>, and PTE<sup>-</sup> proteomics. PCA plot shows PTE<sup>+</sup>, PTE<sup>-</sup>, and sham injured groups from cortical and hippocampal protein derived from whole proteome. Red circles denote female samples.

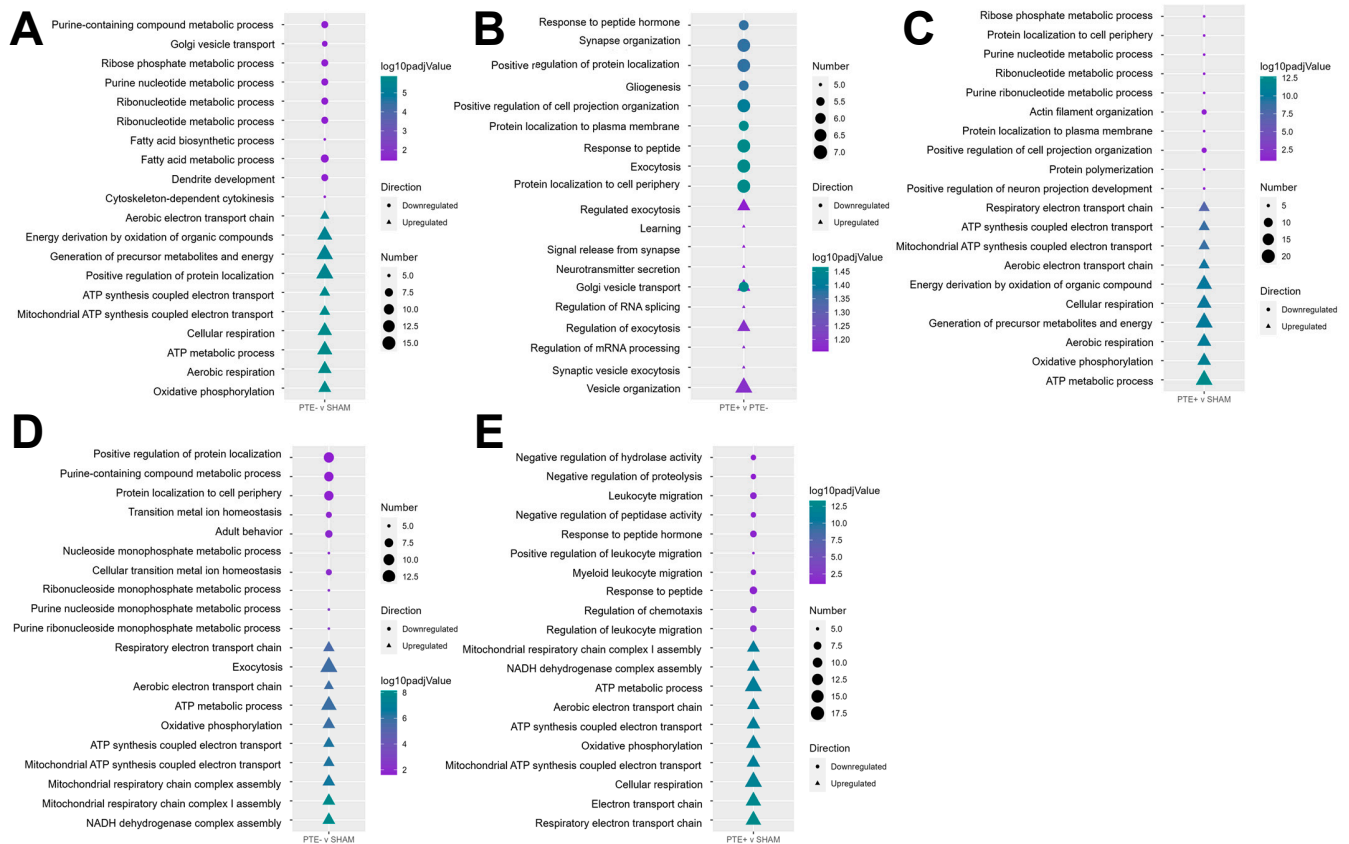

**Supplemental Figure S2:** Pathways analysis reveals biological process dysregulation among all comparisons of PTE<sup>+</sup>, PTE<sup>-</sup>, and sham cortices and hippocampi. Top 10 downregulated (circles) and top 10 upregulated (triangles) GO biological process pathways identified in the whole cortex of (A) PTE<sup>-</sup> vs. sham, (B) PTE<sup>+</sup> vs. PTE<sup>-</sup>, and (C) PTE<sup>+</sup> vs. sham, or the whole hippocampus of (D) PTE<sup>-</sup> vs. sham and (E) PTE<sup>+</sup> vs. sham comparisons from GO enrichment analysis.
