# Supplementary material for: Applying Proteomics and Computational Approaches to Identify Novel Targets in Blast-Associated Post-Traumatic Epilepsy
Source: Int J Mol Sci. 2024 Mar 1;25(5):2880. doi: 10.3390/ijms25052880 (PMC10932294; doi:10.3390/ijms25052880)
Supplement: Supplementary file 1 [file ijms-25-02880-s001.zip › Supplemental Table S1.xlsx]

## Sheet: CTX PTE+
Gene Symbol	Abundances (Grouped): ctx, pte plus	Abundance Ratio: (ctx, pte plus) / (ctx, pte minus)	Abundance Ratio: (ctx, pte minus) / (ctx, sham)	Abundance Ratio: (ctx, pte plus) / (ctx, sham)	Abundance Ratio: (hpc, pte plus) / (hpc, pte minus)	Abundance Ratio: (hpc, pte minus) / (hpc, sham)	Abundance Ratio: (hpc, pte plus) / (hpc, sham)	Log2FC PTE-vPTE+CTX	Log2FCPTE-vSHAMCTX	Log2FCPTE+vSHAMCTX	Log2FC PTE-vPTE+HPC	Log2FCPTE-vSHAMHPC	Log2FCPTE+vSHAMHPC	Abundance Ratio Adj. P-Value: (ctx, pte plus) / (ctx, pte minus)	Abundance Ratio Adj. P-Value: (ctx, pte minus) / (ctx, sham)	Abundance Ratio Adj. P-Value: (ctx, pte plus) / (ctx, sham)	Abundance Ratio Adj. P-Value: (hpc, pte plus) / (hpc, pte minus)	Abundance Ratio Adj. P-Value: (hpc, pte minus) / (hpc, sham)	Abundance Ratio Adj. P-Value: (hpc, pte plus) / (hpc, sham)
Spryd7	501508	100	0.01	3.404	0.799	100	100	6.64386	-6.64386	1.76723	-0.323733	6.64386	6.64386	2.80253e-16	3.30088e-16	7.06931e-05	0.711824	2.21282e-16	2.24357e-16
Trp53bp1	84706.1	100	0.01	0.557	1.157	0.929	1.075	6.64386	-6.64386	-0.844251	0.210389	-0.106249	0.104337	2.80253e-16	3.30088e-16	0.234395	0.987083	0.999918	0.986715
Fbxo21	756395	100	0.01	1.367	1.248	0.735	1.002	6.64386	-6.64386	0.451013	0.319618	-0.444184	0.00288251	2.80253e-16	3.30088e-16	0.634268	0.924527	0.790037	0.983612
Acsl5	450678	0.758	1.235	0.942	0.01	0.782	0.01	-0.39973	0.304511	-0.086201	-6.64386	-0.354759	-6.64386	0.569592	0.87003	0.947127	2.67297e-16	0.890109	2.24357e-16
Kcnj9	527078	100	0.01	1.787	3.092	100	100	6.64386	-6.64386	0.83754	1.62854	6.64386	6.64386	2.80253e-16	3.30088e-16	0.232568	0.0104086	2.21282e-16	2.24357e-16
Anxa7	1.47261e+06	1.054	0.891	0.891	100	0.01	1.291	0.0758749	-0.166503	-0.166503	6.64386	-6.64386	0.368489	0.961465	0.87492	0.840755	2.67297e-16	2.21282e-16	0.652392
Atg16l1	127613	0.414	0.672	0.287	0.829	1.459	1.244	-1.2723	-0.573467	-1.80088	-0.270556	0.54498	0.314986	0.000895401	0.307467	2.653e-05	0.822913	0.504	0.890011
Git2	1.36036e+06	100		100	0.01	0.815	0.01	6.64386	#VALUE!	6.64386	-6.64386	-0.295128	-6.64386	2.80253e-16		2.92648e-16	2.67297e-16	0.849245	2.24357e-16
Isca2	279908	0.814	0.247	0.201	0.812	1.158	0.938	-0.296899	-2.01742	-2.31473	-0.300448	0.211635	-0.0923402	0.737505	9.80054e-13	2.92648e-16	0.610423	0.791471	0.92228
Tinagl1	45048.2	0.571	1.654	0.853	1.1	0.82	0.814	-0.808437	0.725959	-0.229382	0.137504	-0.286304	-0.296899	0.190358	0.483976	0.907345	0.998267	0.945685	0.797375
Kcnj6	808140	2.314	0.32	0.665	1.375	0.727	0.984	1.21039	-1.64386	-0.588574	0.459432	-0.459973	-0.0232698	0.000294421	4.25398e-07	0.176734	0.581854	0.496467	0.965709
Arih1	1.48557e+06	0.71	0.715	0.537	1.1	0.984	0.979	-0.494109	-0.483985	-0.897006	0.137504	-0.0232698	-0.0306192	0.13528	0.126008	0.000729793	0.974593	0.996944	0.960533
Cp	1.3441e+06	5.731	0.515	0.849	1.195	0.87	1.06	2.51879	-0.957356	-0.236164	0.257011	-0.200913	0.0840643	2.80253e-16	0.00995711	0.778222	0.960526	0.972921	0.986715
Mta1	362400	0.779	1.007	0.774	1.011	1.014	0.947	-0.360305	0.0100637	-0.369595	0.015783	0.0200577	-0.0785637	0.647854	0.988767	0.671876	0.960526	0.958874	0.943203
Pip5k1a	921359	0.794	1.507	1.213	1.037	1.152	1.212	-0.332789	0.591679	0.27858	0.0524159	0.204141	0.27739	0.68144	0.19286	0.851013	0.979906	0.81627	0.865815
Aoc3	491820	1.381	0.897	1.269	0.652	0.937	0.602	0.465713	-0.15682	0.343692	-0.617056	-0.093879	-0.732165	0.479383	0.901835	0.843871	0.304954	0.993381	0.0544106
Gsdme	1.4269e+06	0.857	1.127	0.981	0.01	100		-0.222633	0.172488	-0.027675	-6.64386	6.64386	#VALUE!	0.782559	0.901835	0.970806	2.67297e-16	2.21282e-16
Mindy1	1.41776e+06	0.857	0.861	0.711	1.266	1.124	1.325	-0.222633	-0.215915	-0.492079	0.340277	0.168642	0.405992	0.768697	0.779817	0.170939	0.827195	0.83958	0.486456
Rgs10	1.65966e+06	0.868	1.139	0.979	1.061	1.096	1.563	-0.204233	0.187768	-0.0306192	0.0854247	0.132248	0.644318	0.788535	0.895056	0.961997	0.987083	0.899424	0.223369
Stim2	181231	0.871	0.694	0.605	1.062	0.943	1.06	-0.199255	-0.526992	-0.724993	0.0867838	-0.0846703	0.0840643	0.885085	0.451065	0.29314	0.987083	0.989261	0.986715
Cbr2	40392.6	0.876	0.76	0.666	2.105	0.944	1.828	-0.190997	-0.395929	-0.586406	1.07382	-0.0831412	0.870266	0.931819	0.622625	0.624731	0.362895	0.995117	0.192759
Maged1	1.58839e+06	1.379	0.874	1.128	0.837	0.738	0.649	0.463622	-0.194295	0.173767	-0.2567	-0.438307	-0.62371	0.365082	0.852603	0.923434	0.699538	0.587378	0.0702999
Fam234b	892204	0.959	1.001	0.875	0.927	0.911	0.839	-0.0603973	0.00144197	-0.192645	-0.109359	-0.134477	-0.253257	0.951481	0.992438	0.840235	0.896907	0.952109	0.62675
Shank2	1.21415e+06	100	0.01	0.67	1.525	0.56	0.78	6.64386	-6.64386	-0.577767	0.608809	-0.836501	-0.358454	2.80253e-16	3.30088e-16	0.13719	0.414767	0.0615831	0.408993
Trappc1	3.60981e+07	1.111	0.995	1.07	2.137	0.665	0.981	0.151859	-0.00723157	0.0976108	1.09559	-0.588574	-0.027675	0.439062	0.989292	0.892949	2.67297e-16	0.00215798	0.959122
Camk1	3.25817e+06	1.008	1.059	1.046	1.138	100	100	0.0114956	0.0827026	0.0648829	0.186501	6.64386	6.64386	0.991684	0.973209	0.982459	0.935042	2.21282e-16	2.24357e-16
	1.26293e+06	1.013	0.929	0.908	0.96	1.426	1.352	0.0186342	-0.106249	-0.139236	-0.0588937	0.511974	0.435095	0.99982	0.922157	0.874362	0.936607	0.158852	0.390016
Chd3	83046.1	1.019	1.048	1.31	1.083	1.041	1.183	0.0271541	0.0676387	0.389567	0.115033	0.0579701	0.24245	0.985762	0.992438	0.877627	0.994798	0.95324	0.934369
Nup93	135549	1.055	1.385	1.476	1.832	0.779	0.873	0.077243	0.469886	0.561693	0.87342	-0.360305	-0.195946	0.97244	0.730777	0.708143	0.576058	0.901483	0.875597
Lipe	300768	1.071	1.12	1.145	1.229	0.911	1.138	0.0989585	0.163499	0.195348	0.297485	-0.134477	0.186501	0.970221	0.964159	0.968695	0.952887	0.999577	0.945305
Tmem177	767848	1.08	1.128	0.927	1.304	1.314	1.415	0.111031	0.173767	-0.109359	0.382944	0.393965	0.500802	0.941297	0.901835	0.928343	0.82065	0.550319	0.42916
Ddx42	2.47168e+06	1.088	0.954	1.096	1.089	1.004	1.104	0.121679	-0.0679388	0.132248	0.123004	0.00575927	0.14274	0.895937	0.952657	0.95288	0.985199	0.973626	0.946992
Rabggtb	2.47207e+06	0.956	0.545	0.476	1.398	1.147	1.505	-0.0649175	-0.875672	-1.07097	0.483364	0.197865	0.589763	0.961212	0.000263046	3.23987e-06	0.547022	0.774642	0.0605071
Pnpla8	764572	1.13	1.106	1.343	0.825	1.34	1.123	0.176323	0.145351	0.425459	-0.277534	0.422233	0.167358	0.892151	0.9619	0.699984	0.762068	0.563428	0.949219
Arhgef25	691099	1.158	1.577	1.859	1.332	0.834	1.179	0.211635	0.657183	0.894527	0.413594	-0.261881	0.237564	0.859876	0.305673	0.0905738	0.868391	0.947773	0.901509
Wbp11	731162	1.169	0.865	1.149	0.809	0.942	0.792	0.225275	-0.209228	0.200379	-0.305788	-0.086201	-0.336428	0.847928	0.865237	0.930634	0.730773	0.991332	0.610552
Slc23a2	1.20574e+06	0.924	1.012	1.033	0.727	1.65	1.185	-0.114035	0.0172093	0.0468403	-0.459973	0.722466	0.244887	0.939708	0.999791	0.998977	0.308841	0.0395616	0.885001
Acsf3	647683	0.657	1.152	0.731	0.558	1.714	0.857	-0.606035	0.204141	-0.452057	-0.841663	0.777367	-0.222633	0.180856	0.898166	0.450133	0.0632763	0.0937811	0.793582
Ndc1	78227.2	0.454	2.586	1.209	1.034	1.87	2.017	-1.13924	1.37072	0.273814	0.0482362	0.903038	1.01221	0.0093147	0.00725899	0.933901	0.984321	0.157776	0.0721133
HC	2.63305e+06	0.68	1.765	1.425	0.01	0.764	0.01	-0.556393	0.819668	0.510962	-6.64386	-0.388355	-6.64386	0.0733437	0.0128984	0.258403	2.67297e-16	0.409825	2.24357e-16
Kcna6	1.32708e+06	1.227	0.962	1.153	0.01	0.573	0.01	0.295135	-0.0558912	0.205393	-6.64386	-0.803393	-6.64386	0.724561	0.9619	0.896944	2.67297e-16	0.271599	2.24357e-16
Pak5	992638	0.996	1.772	1.619	1.566	0.863	1.303	-0.00578235	0.825379	0.695103	0.647084	-0.212568	0.381837	0.998876	0.0236022	0.178218	0.546482	0.96527	0.717658
S100a6	52063.4	1.173	2.606	2.05	1.56	1.568	2.039	0.230203	1.38184	1.03562	0.641546	0.648926	1.02786	0.864095	0.0123825	0.259966	0.773303	0.414108	0.0625711
ALB	700579	1.331	0.822	1.28	1.26	0.68	0.711	0.412511	-0.28279	0.356144	0.333424	-0.556393	-0.492079	0.544137	0.7061	0.66864	0.817667	0.23498	0.117234
Acap3	287974	1.125	1.874		0.82	0.996	0.741	0.169925	0.906121	#VALUE!	-0.286304	-0.00578235	-0.432455	0.894717	0.0293507		0.807176	0.966884	0.422087
Cacnb1	2.85411e+06	1.479	0.668	0.96	1.016	0.987	0.996	0.564622	-0.58208	-0.0588937	0.0229004	-0.018878	-0.00578235	0.0620074	0.101541	0.943445	0.987083	0.995117	0.983544
Dnal1	387212	0.645	2.15	1.476	0.01	100		-0.632629	1.10434	0.561693	-6.64386	6.64386	#VALUE!	0.167228	0.0155085	0.634268	2.67297e-16	2.21282e-16
Scn3a	253109	0.665	1.242	0.874	0.888	100	100	-0.588574	0.312665	-0.194295	-0.171368	6.64386	6.64386	0.250979	0.878574	0.878768	0.866538	2.21282e-16	2.24357e-16
Serpinc1	2.54283e+06	2.179	0.687	1.341	0.719	1.453	1.386	1.12367	-0.541618	0.423309	-0.475936	0.539035	0.470927	3.2128e-05	0.121761	0.383755	0.236157	0.108698	0.208866
Cyp51a1	27692.5	0.414	3.305	1.301	0.717	0.515	0.775	-1.2723	1.72465	0.379621	-0.479955	-0.957356	-0.367732	0.00287137	0.000405263	0.886526	0.705067	0.294452	0.686852
Plscr3	1.49482e+06	100		100	0.01	100		6.64386	#VALUE!	6.64386	-6.64386	6.64386	#VALUE!	2.80253e-16		2.92648e-16	2.67297e-16	2.21282e-16
Micos10	937426	0.94	0.975	0.881	100		100	-0.0892673	-0.0365259	-0.182786	6.64386	#VALUE!	6.64386	0.949731	0.969211	0.851013	2.67297e-16		2.24357e-16
Cacng2	128725	0.446	100	100	0.01	1.087	0.01	-1.16488	6.64386	6.64386	-6.64386	0.120352	-6.64386	0.0047151	3.30088e-16	2.92648e-16	2.67297e-16	0.923344	2.24357e-16
Cutc	75860.8	0.657	100	100	0.622	1.061	0.682	-0.606035	6.64386	6.64386	-0.685014	0.0854247	-0.552156	0.421585	3.30088e-16	2.92648e-16	0.454009	0.944926	0.436054
Trnt1	424811	0.851	100	100	0.997	100	100	-0.232769	6.64386	6.64386	-0.00433459	6.64386	6.64386	0.834741	3.30088e-16	2.92648e-16	0.951771	2.21282e-16	2.24357e-16
Gpcpd1	344593	1.333	1.156	1.503	1.968	100	100	0.414677	0.209141	0.587845	0.97673	6.64386	6.64386	0.656987	0.943361	0.650505	0.424312	2.21282e-16	2.24357e-16
Dmac2l	1.11129e+06	1.32	100	100	100		100	0.400538	6.64386	6.64386	6.64386	#VALUE!	6.64386	0.587692	3.30088e-16	2.92648e-16	2.67297e-16		2.24357e-16
Rock1	135888	0.834	0.868	0.748	0.086	9.697	0.833	-0.261881	-0.204233	-0.41889	-3.53952	3.27754	-0.263612	0.855108	0.892713	0.733259	2.67297e-16	2.21282e-16	0.801782
Snrk	322708	100	0.01	0.96	0.372	100	100	6.64386	-6.64386	-0.0588937	-1.42663	6.64386	6.64386	2.80253e-16	3.30088e-16	0.959937	0.0138145	2.21282e-16	2.24357e-16
Fam171b	932372	100	0.01	0.596	2.012	100	100	6.64386	-6.64386	-0.746616	1.00863	6.64386	6.64386	2.80253e-16	3.30088e-16	0.026479	0.190687	2.21282e-16	2.24357e-16
Wdr54	7.07708e+06	2.148	0.947	1.763	2.84	0.207	0.542	1.10299	-0.0785637	0.818032	1.50589	-2.2723	-0.883635	2.56121e-09	0.920053	0.000729793	1.11091e-05	2.21282e-16	2.94709e-06
Sh3pxd2a	75786.4	0.586	1.804	1.212	1.015	0.874	0.661	-0.771027	0.851199	0.27739	0.0214797	-0.194295	-0.597278	0.21196	0.291306	0.933901	0.974391	0.973626	0.339674
Dlg3	26079.5	0.418	1.019	0.417	0.614	1.067	0.782	-1.25843	0.0271541	-1.26188	-0.703689	0.0935602	-0.354759	0.0129714	0.975281	0.0531554	0.452537	0.942337	0.716464
Hk2	2.62386e+06	0.855	0.547	0.494	1.34	0.853	0.99	-0.226004	-0.870387	-1.01742	0.422233	-0.229382	-0.0144996	0.730777	0.000159228	1.20453e-05	0.569428	0.742972	0.97844
Mlc1	3.30206e+06	1.123	0.724	0.81	100	0.01	0.923	0.167358	-0.465938	-0.304006	6.64386	-6.64386	-0.115597	0.808561	0.135863	0.542542	2.67297e-16	2.21282e-16	0.864002
Stambp	945485	0.749	1.05	0.804	1.54	0.969	1.463	-0.416962	0.0703893	-0.314733	0.62293	-0.0454314	0.54893	0.514152	0.979243	0.645004	0.457589	0.991332	0.347704
Slc43a2	726252	0.542	0.935	0.61	0.907	1.494	1.396	-0.883635	-0.0969617	-0.713119	-0.140826	0.57918	0.481299	0.0175064	0.93468	0.0531886	0.838019	0.237413	0.515988
Rmnd1	1.07026e+06	0.996	1.062	1.173	0.564	0.819	0.527	-0.00578235	0.0867838	0.230203	-0.826233	-0.288065	-0.924125	0.997862	0.975271	0.885774	0.0711744	0.847281	0.00845648
Sphkap	70383.6	0.793	0.954	0.734	0.774	1.17	0.941	-0.334607	-0.0679388	-0.446148	-0.369595	0.226509	-0.0877334	0.805447	0.939723	0.723684	0.770492	0.861046	0.943203
Ttbk1	43275.8	0.333	1.211	0.347	3.885	0.182	0.584	-1.58641	0.276199	-1.52699	1.95791	-2.45799	-0.77596	5.51656e-05	0.921831	0.00542755	0.00347311	7.35849e-07	0.114107
	467816	0.656	1.029	0.682	0.689	0.834	0.577	-0.608232	0.041243	-0.552156	-0.537424	-0.261881	-0.793357	0.202403	0.998945	0.369082	0.355632	0.942337	0.027185
Zbtb18	127806	1.054	1.001	1.119	2.79	0.368	1.071	0.0758749	0.00144197	0.16221	1.48027	-1.44222	0.0989585	0.961465	0.969211	0.973644	0.00299337	0.00272422	0.985307
HRNR	43275.8	2.172	1.086	2.423	2.555	0.182	0.57	1.11902	0.119024	1.27679	1.35332	-2.45799	-0.810966	0.0274493	0.999791	0.0911015	0.15389	7.35849e-07	0.096238
Mfap1b	355496	0.738	1.041	0.865	0.634	0.932	0.587	-0.438307	0.0579701	-0.209228	-0.657445	-0.101598	-0.768568	0.523017	0.998187	0.861551	0.374851	0.999918	0.0375748
Aldh3b1	1.45431e+06	0.843	0.96	0.853	1.046	1.025	1.095	-0.246395	-0.0588937	-0.229382	0.0648829	0.0356239	0.130931	0.704054	0.961202	0.6754	0.999873	0.971664	0.944152
Serpina1e	3.44109e+06	0.846	1.107	0.856	0.777	0.993	0.885	-0.24127	0.146655	-0.224317	-0.364013	-0.0101344	-0.176251	0.640505	0.90916	0.724606	0.516873	0.989757	0.797375
Luc7l	1.33889e+06	0.861	1.226	0.764	0.716	1.125	1.303	-0.215915	0.293959	-0.388355	-0.481969	0.169925	0.381837	0.843489	0.764964	0.525166	0.308841	0.817519	0.604502
Herc4	489759	0.865	0.97	0.82	1.372	0.893	1.118	-0.209228	-0.0439433	-0.286304	0.45628	-0.163268	0.16092	0.855108	0.966245	0.778222	0.863369	0.980338	0.95009
Znf512	1.6934e+06	0.868	1.109	0.995	0.843	1.069	0.872	-0.204233	0.149259	-0.00723157	-0.246395	0.0962619	-0.1976	0.7884	0.920045	0.971048	0.72958	0.915555	0.757497
Naprt	78752.3	0.876	1.911	1.397	1.101	1.143	1.171	-0.190997	0.934328	0.482332	0.138814	0.192825	0.227741	0.911286	0.209246	0.8291	0.994798	0.886966	0.943044
Csnk2b	2.72857e+06	0.881	1.253	1.069	0.01	0.874	0.01	-0.182786	0.325386	0.0962619	-6.64386	-0.194295	-6.64386	0.808659	0.611299	0.963321	2.67297e-16	0.920718	2.24357e-16
Srp68	772218	0.892	1.278	1.228				-0.164884	0.353888	0.296311	#VALUE!	#VALUE!	#VALUE!	0.885085	0.714816	0.851013
Mrps2	127031	0.905	1.304	0.592	2.209	0.439	0.82	-0.14401	0.382944	-0.756331	1.14339	-1.18771	-0.286304	0.935822	0.845952	0.32323	0.291457	0.107913	0.802884
Pde4a	990606	0.909	0.914	0.964	1.186	0.742	0.876	-0.137648	-0.129734	-0.0528949	0.246104	-0.430509	-0.190997	0.898994	0.896839	0.953979	0.919329	0.595331	0.759984
Cfb	1.01427e+07	1.355	0.753	1.105	0.853	0.813	0.675	0.438293	-0.409278	0.144046	-0.229382	-0.298673	-0.567041	0.021545	0.0659501	0.883269	0.579747	0.549964	0.00255414
Arhgef17	95530.3	0.92	0.803	0.748	1.239	0.823	1.018	-0.120294	-0.316528	-0.41889	0.309176	-0.281036	0.0257376	0.961212	0.746436	0.728479	0.942287	0.944926	0.986715
Atg101	202580	0.929	1.812	1.546	0.933	1.06	0.824	-0.106249	0.857583	0.62854	-0.100051	0.0840643	-0.279284	0.944519	0.211075	0.634268	0.926872	0.944926	0.803551
Ghitm	6.67753e+06	0.839	1.204	0.98	0.486	0.588	0.285	-0.253257	0.267835	-0.0291463	-1.04097	-0.766112	-1.81097	0.450013	0.433976	0.971178	0.00147247	0.0012529	2.24357e-16
Zfand5	604319	0.942	1.026	0.938	0.987	1.283	1.078	-0.086201	0.0370307	-0.0923402	-0.018878	0.359521	0.108357	0.959811	0.998945	0.933901	0.941292	0.625086	0.983612
Inpp5j	41635.5	0.964	0.934		1.112	0.894	1.072	-0.0528949	-0.0985055	#VALUE!	0.153157	-0.161653	0.100305	0.976252	0.936685		0.992311	0.979079	0.986592
Coq10a	596987	0.964	0.888	0.899	1.598	0.529	0.74	-0.0528949	-0.171368	-0.153607	0.676267	-0.91866	-0.434403	0.975832	0.888085	0.888665	0.594857	0.152607	0.402811
Serpini1	656071	0.967	1.295	1.193	1.689	0.781	1.433	-0.0484122	0.372952	0.254594	0.756169	-0.356606	0.519039	0.978235	0.769808	0.915769	0.537571	0.900091	0.445148
Nxf1	432820	0.97	0.938	0.932	0.914	1.148	1.028	-0.0439433	-0.0923402	-0.101598	-0.129734	0.199123	0.0398403	0.980451	0.938799	0.936143	0.869039	0.833254	0.999548
Tmcc1	810825	0.978	0.683	0.67	1.255	0.781	1.042	-0.0320936	-0.550043	-0.577767	0.327687	-0.356606	0.0593553	0.981951	0.154512	0.184051	0.866538	0.796103	0.999853
Ddx3y	676492	0.981	0.806	0.888	0.875	1.09	0.889	-0.027675	-0.311148	-0.171368	-0.192645	0.124328	-0.169745	0.990505	0.7061	0.87948	0.825748	0.894213	0.871453
Pgm2	939337	0.983	1.142	1.09	0.744	0.887	0.645	-0.0247367	0.191563	0.124328	-0.426625	-0.172994	-0.632629	0.984342	0.901835	0.968695	0.51256	0.973626	0.123956
Asph	107562	0.988	1.001	1.145	1.058	0.918	0.863	-0.0174171	0.00144197	0.195348	0.0813396	-0.123434	-0.212568	0.99982	0.969211	0.968695	0.989425	0.989707	0.862446
Nudcd1	809790	0.997	0.91	0.904	1.074	0.81	1.013	-0.00433459	-0.136062	-0.145605	0.102994	-0.304006	0.0186342	0.991684	0.901835	0.885598	0.993885	0.920389	0.986715
Tenm4	2.023e+06	1.01	1.151	1.173	0.955	1.208	1.138	0.0143553	0.202888	0.230203	-0.0664274	0.27262	0.186501	0.992929	0.881979	0.874362	0.930527	0.649054	0.911278
Mpi	1.36941e+06	1.015	1.052	0.958	1.557	1.885	2.62	0.0214797	0.0731347	-0.0619024	0.638769	0.914565	1.38957	0.998979	0.975007	0.955295	0.348079	0.0207287	8.06681e-06
Nsg2	171997	1.02	1.031	1	1.107	1.026	1.289	0.0285692	0.0440443	0	0.146655	0.0370307	0.366252	0.99271	0.994722	0.980585	0.995599	0.960082	0.853156
Sypl	3.03286e+06	1.027	0.732	0.803	0.979	0.931	0.944	0.0384362	-0.450084	-0.316528	-0.0306192	-0.103147	-0.0831412	0.970624	0.146798	0.522893	0.960526	0.972921	0.924906
Rnasek	9.7812e+06	1.032	1.118	1.169	0.976	0.925	0.897	0.045443	0.16092	0.225275	-0.0350469	-0.112475	-0.15682	0.961212	0.800124	0.717119	0.917345	0.94865	0.66152
Krt8	765355	1.035	0.993	0.978	1.006	0.932	0.933	0.0496308	-0.0101344	-0.0320936	0.00863031	-0.101598	-0.100051	0.984921	0.985424	0.963365	0.979906	0.973626	0.901509
Cnot11	89300.6	1.062	1.104	1.438	1.155	0.641	0.589	0.0867838	0.14274	0.524064	0.207893	-0.641604	-0.76366	0.955985	0.988961	0.772622	0.989425	0.648314	0.14384
Atp2c1	2.31599e+06	1.087	0.909	0.972	0.921	1.1	1.09	0.120352	-0.137648	-0.0409718	-0.118727	0.137504	0.124328	0.895937	0.900434	0.959937	0.869131	0.883427	0.949219
Csnk1d	1.35069e+07	0.86	0.869	0.727	0.769	2.138	1.506	-0.217591	-0.202572	-0.459973	-0.378944	1.09626	0.590722	0.308446	0.265755	0.0113968	0.0229208	1.37712e-10	0.000447442
Smarcal1	496561	1.11	0.89	0.952	1.342	0.836	1.197	0.15056	-0.168123	-0.0709665	0.424385	-0.258425	0.259423	0.914941	0.898166	0.955295	0.866538	0.952109	0.876834
Nop58	701164	1.118	1.179	1.336	1	0.801	0.783	0.16092	0.237564	0.41792	0	-0.320126	-0.352916	0.900448	0.902559	0.715985	0.957622	0.90695	0.566961
Itpk1	237413	1.139	1.137	1.283	1.122	1.078	1.095	0.187768	0.185232	0.359521	0.166073	0.108357	0.130931	0.906915	0.959806	0.883269	0.995218	0.924845	0.982367
Cd44	1.31747e+06	0.733	1.067	0.775	1.475	1.186	1.641	-0.448115	0.0935602	-0.367732	0.560715	0.246104	0.714575	0.308446	0.963813	0.555928	0.41041	0.731524	0.0200384
Aifm3	345903	1.166	0.935	1.259	0.95	0.971	0.939	0.221568	-0.0969617	0.332278	-0.0740006	-0.0424568	-0.0908029	0.863605	0.932059	0.779365	0.896267	0.997978	0.92228
Ccar1	874703	1.191	1.055	1.24	1.096	0.804	0.911	0.252173	0.077243	0.31034	0.132248	-0.314733	-0.134477	0.822158	0.982356	0.824552	0.998267	0.90156	0.890011
Lamp1	153317	0.021	6.509	0.764	1.399	1.689	2.414	-5.57347	2.70244	-0.388355	0.484396	0.756169	1.27143	2.80253e-16	3.30088e-16	0.591048	0.00512379	2.58187e-05	2.24357e-16
Rps6ka6	400576	1.202	0.775	0.859	0.472	100	100	0.265437	-0.367732	-0.21927	-1.08314	6.64386	6.64386	0.798441	0.622625	0.851013	0.0315497	2.21282e-16	2.24357e-16
Apbb1	1.29032e+06	1.204	1	1.155	1.211	0.914	1.193	0.267835	0	0.207893	0.276199	-0.129734	0.254594	0.77021	0.989284	0.892055	0.896907	0.970428	0.876584
Plxnd1	504947	1.217	0.832	1.042	1.728	0.899	1.437	0.283329	-0.265345	0.0593553	0.789103	-0.153607	0.52306	0.78391	0.789669	0.997892	0.646628	0.985431	0.596385
Ap3m1	2.07821e+06	1.222	0.781	0.975	0.968	0.915	0.898	0.289244	-0.356606	-0.0365259	-0.046921	-0.128156	-0.155213	0.696732	0.455047	0.956005	0.94807	0.964994	0.830773
Adissp	9.56397e+06	1.226	0.909	1.036	100	0.01	0.492	0.293959	-0.137648	0.051024	6.64386	-6.64386	-1.02327	0.233946	0.772416	0.978248	2.67297e-16	2.21282e-16	1.27246e-06
Mix23	69378.8	1.252	0.693	0.868	1.699	0.929	1.477	0.324235	-0.529073	-0.204233	0.764686	-0.106249	0.56267	0.780685	0.452659	0.915769	0.7276	0.999918	0.602265
Srp19	354398	1.265	0.83	1.05	1.265	1.088	1.206	0.339137	-0.268817	0.0703893	0.339137	0.121679	0.27023	0.756199	0.804485	0.999917	0.928936	0.908826	0.87093
Cdc42bpa	931535	1.057	2.025	1.846	0.484	2.147	1.704	0.0799754	1.01792	0.884403	-1.04692	1.10232	0.768925	0.961465	0.00813754	0.0509017	0.0014364	0.00111504	0.104983
Dip2a	105332	0.651	2.402	1.612	3.128	0.26	0.872	-0.619271	1.26424	0.688852	1.64524	-1.94342	-0.1976	0.36945	0.0334808	0.604735	0.0260065	0.000518314	0.876834
Rufy1	165750	1.344	0.942	1.336	1.887	0.751	1.513	0.426533	-0.086201	0.41792	0.916094	-0.413115	0.597412	0.653522	0.930885	0.853002	0.519112	0.872682	0.523982
Prxl2b	6.32104e+06	3.249	0.662	1.867			0.953	1.7	-0.595097	0.900722	#VALUE!	#VALUE!	-0.0694519	2.80253e-16	0.0988915	0.000304386			0.925468
Mipep	917936		0.998	1.17	2.473	0.601	1.486	#VALUE!	-0.00288828	0.226509	1.30626	-0.734563	0.571434		0.989292	0.883269	0.000104211	0.204492	0.163733
Arsb	234794	1.442	0.761	1.17	0.764	1.104	0.886	0.528071	-0.394032	0.226509	-0.388355	0.14274	-0.174621	0.464795	0.654961	0.959937	0.729395	0.889902	0.889892
Cwc15	862113	1.589	1.129	1.944	0.823	1.229	1.115	0.668119	0.175045	0.959028	-0.281036	0.297485	0.157044	0.128781	0.951297	0.0397	0.813587	0.740753	0.960526
Crtac1	312378	0.774	2.373	2.004	1.494	0.81	1.048	-0.369595	1.24671	1.00288	0.57918	-0.304006	0.0676387	0.625215	0.0108965	0.16159	0.776597	0.933686	0.992671
Psmg1	681923	1.956	1.001	1.145	0.924	1.311	1.067	0.967906	0.00144197	0.195348	-0.114035	0.390668	0.0935602	0.0127691	0.985698	0.946262	0.869521	0.609109	0.986929
Lars2	367334	2.33	0.772	2.621	1.159	1.008	1.185	1.22033	-0.373327	1.39012	0.212881	0.0114956	0.244887	0.0012821	0.665295	0.00754594	0.986587	0.964536	0.901509
Rragb	4.71434e+06	2.288	0.9	2.211	0.813	1.051	1.156	1.19409	-0.152003	1.1447	-0.298673	0.0717627	0.209141	4.52235e-09	0.895056	1.52211e-06	0.546003	0.947773	0.837299
Ap3s2	2.57909e+06	2.057	1.25	2.545	0.573	100	100	1.04054	0.321928	1.34767	-0.803393	6.64386	6.64386	1.38062e-05	0.683512	3.71772e-07	0.0237743	2.21282e-16	2.24357e-16
Elfn2	375247	0.73	2.618	1.979	1.06	0.983	1.015	-0.454032	1.38847	0.984772	0.0840643	-0.0247367	0.0214797	0.477064	0.00116531	0.143372	0.989425	0.973626	0.987051
Nemf	1.60073e+06	0.758	3.208	2.641	1.173	0.922	1.258	-0.39973	1.68167	1.40108	0.230203	-0.117161	0.331132	0.415395	1.71326e-09	1.71034e-05	0.951614	0.973626	0.784493
Dennd10	509827	0.763	4.258	2.758	4.143	0.499	2.069	-0.390245	2.09018	1.46362	2.05068	-1.00289	1.04893	0.587692	2.37996e-08	0.00268989	3.35663e-05	0.230304	0.00553611
Kctd8	1.40446e+06	1.081	1.002	1.121	100	0.01	0.753	0.112367	0.00288251	0.164786	6.64386	-6.64386	-0.409278	0.939708	0.996329	0.936143	2.67297e-16	2.21282e-16	0.364877
Mrps34	2.47682e+06	0.726	100	100	1.173	0.763	0.895	-0.461959	6.64386	6.64386	0.230203	-0.390245	-0.16004	0.153621	3.30088e-16	2.92648e-16	0.910524	0.573877	0.843728
Timm13	8.05567e+06	0.984	100	100	1.326	1.104	1.283	-0.0232698	6.64386	6.64386	0.407081	0.14274	0.359521	0.990974	3.30088e-16	2.92648e-16	0.704296	0.849799	0.488358
Cpne2	803291	100	0.01	0.839	1.019	0.942	0.963	6.64386	-6.64386	-0.253257	0.0271541	-0.086201	-0.0543923	2.80253e-16	3.30088e-16	0.74432	0.987083	0.98155	0.941263
Scn1b	61497.2	0.705	1.5	0.301	1.408	0.527	0.758	-0.504305	0.584963	-1.73216	0.493647	-0.924125	-0.39973	0.608653	0.594351	0.000488358	0.88646	0.331717	0.646342
Tomm40l	303584	0.492	1.125	0.306	0.639	0.811	0.967	-1.02327	0.169925	-1.7084	-0.646112	-0.302226	-0.0484122	0.000730297	0.901341	1.87918e-13	0.108252	0.714309	0.95009
CAT	7.02657e+06	1.127	1.156	1.303	0.89	0.35	0.257	0.172488	0.209141	0.381837	-0.168123	-1.51457	-1.96016	0.696732	0.716991	0.298862	0.805469	2.21282e-16	2.24357e-16
Eif2b4	37112.7	0.659	1.693	1.031	1.015	0.906	0.888	-0.60165	0.759582	0.0440443	0.0214797	-0.142417	-0.171368	0.498771	0.446522	0.99674	0.969814	0.987609	0.901509
Ppox	1.40028e+06	0.689	1.115	0.785	1.101	0.993	1.219	-0.537424	0.157044	-0.349235	0.138814	-0.0101344	0.285698	0.168773	0.904525	0.487177	0.974391	0.975984	0.776989
Banf1	1.21298e+06	0.721	1.153	0.836	1.224	0.692	0.884	-0.471929	0.205393	-0.258425	0.291604	-0.531156	-0.177882	0.295988	0.88691	0.738976	0.855466	0.307193	0.80142
Snrpf	5.38971e+06	0.724	1.151	0.845	1.04	0.915	0.986	-0.465938	0.202888	-0.242977	0.0565835	-0.128156	-0.0203404	0.0538222	0.702843	0.586194	0.999773	0.915555	0.968758
Nudc	213172	0.733	0.865	0.647	0.785	1.681	1.413	-0.448115	-0.209228	-0.628162	-0.349235	0.74932	0.498761	0.564994	0.884424	0.406104	0.762212	0.258871	0.628521
Prmt8	7.37263e+06	2.784	0.461	1.022	1.039	1.276	1.271	1.47716	-1.11716	0.0313952	0.0551957	0.351628	0.345964	2.80253e-16	2.40714e-08	0.989372	0.996897	0.429206	0.513451
Senp8	221416	100	0.01	1.305	0.782	0.649	0.497	6.64386	-6.64386	0.38405	-0.354759	-0.62371	-1.00868	2.80253e-16	3.30088e-16	0.87164	0.769355	0.694002	0.0185895
Iscu	4.0233e+06	0.742	1.129	0.821	0.825	100	100	-0.430509	0.175045	-0.284546	-0.277534	6.64386	6.64386	0.164278	0.863085	0.593558	0.671917	2.21282e-16	2.24357e-16
Cntnap5a	195358	0.748	1.494	1.001	0.784	1.403	1.009	-0.41889	0.57918	0.00144197	-0.351074	0.488515	0.0129262	0.540918	0.54868	0.977871	0.779458	0.576366	0.985307
Cfap20dc	672827	0.749	1.214	0.914	0.905	1.138	1.074	-0.416962	0.279768	-0.129734	-0.14401	0.186501	0.102994	0.501619	0.816324	0.915769	0.861853	0.828391	0.985307
Map7	344308	2.032	0.509	0.886	1.101	0.872	0.918	1.0229	-0.974262	-0.174621	0.138814	-0.1976	-0.123434	0.0182885	0.0350254	0.888102	0.994798	0.973626	0.925362
Ahnak	1.62004e+06	0.86	1.259	0.999	0.536	1.039	0.529	-0.217591	0.332278	-0.00144342	-0.899695	0.0551957	-0.91866	0.7884	0.610591	0.973644	0.00571307	0.94865	0.0014797
Slc12a9	221223	0.801	1.068	0.854	1.026	1.049	1.019	-0.320126	0.0949116	-0.227692	0.0370307	0.0690147	0.0271541	0.711925	0.989292	0.868871	0.977036	0.943228	0.986911
Ilvbl	512681	1.693	0.556	0.905	0.624	0.987	0.542	0.759582	-0.846843	-0.14401	-0.680382	-0.018878	-0.883635	0.100308	0.0582752	0.915769	0.212763	0.972921	0.0131059
Tfam	3.74928e+06	0.825	0.997	0.889	100		100	-0.277534	-0.00433459	-0.169745	6.64386	#VALUE!	6.64386	0.568232	0.987121	0.843871	2.67297e-16		2.24357e-16
Pakap	1.62716e+06	0.922	0.691	0.662	0.812	1.425	1.161	-0.117161	-0.533242	-0.595097	-0.300448	0.510962	0.215368	0.908738	0.140093	0.0710815	0.660254	0.156803	0.853156
Emd	5.73554e+06	0.844	1.195	1.02	1.003	0.972	0.987	-0.244685	0.257011	0.0285692	0.00432161	-0.0409718	-0.018878	0.572564	0.565382	0.996138	0.974391	0.989261	0.977176
Cdh11	1.73465e+06	0.852	1.158	0.923	0.949	0.956	0.9	-0.231075	0.211635	-0.115597	-0.07552	-0.0649175	-0.152003	0.732913	0.868287	0.88281	0.922509	0.995117	0.840078
Stxbp1	9.12784e+06	2.116	1.656	2.46	2.701	0.368	1.218	1.08134	0.727703	1.29866	1.43349	-1.44222	0.284514	5.95559e-12	0.00732083	1.03775e-10	1.29265e-06	2.40675e-09	0.52989
Anxa1	576188	0.783	100	100	1.659	0.461	0.773	-0.352916	6.64386	6.64386	0.730314	-1.11716	-0.37146	0.659712	3.30088e-16	2.92648e-16	0.480828	0.039863	0.508668
Arpc1b	1.35969e+06	0.868	0.79	0.726	1.311	0.914	1.104	-0.204233	-0.340075	-0.461959	0.390668	-0.129734	0.14274	0.81705	0.545742	0.273691	0.784461	0.973626	0.960694
Akt2	558144	100		100	0.825	0.736	0.589	6.64386	#VALUE!	6.64386	-0.277534	-0.442222	-0.76366	2.80253e-16		2.92648e-16	0.752017	0.81627	0.0357923
Slc25a29	180817	0.876	1.176	1.084	1.456	0.731	1.051	-0.190997	0.233888	0.116365	0.54201	-0.452057	0.0717627	0.887352	0.926367	0.986577	0.800257	0.81627	0.988918
Scai	4.49207e+06	1.538	0.618	1.028	0.627	1.32	0.81	0.621056	-0.694321	0.0398403	-0.673463	0.400538	-0.304006	0.0080943	0.00659289	0.977716	0.0130349	0.160644	0.320725
Ermp1	2.63486e+06	0.887	1.16	1.052	0.767	0.991	0.801	-0.172994	0.214125	0.0731347	-0.382702	-0.013043	-0.320126	0.837078	0.856822	0.979361	0.51256	0.991332	0.409988
Sec23ip	2.86989e+06	0.894	0.963	0.848	1.019	1.03	0.951	-0.161653	-0.0543923	-0.237864	0.0271541	0.0426443	-0.0724828	0.855108	0.943315	0.700043	0.989425	0.958874	0.931364
Mindy4b-ps	1.63641e+06	1.009	1.1	1.076	0.85	0.764	0.667	0.0129262	0.137504	0.105678	-0.234465	-0.388355	-0.584241	0.99982	0.927868	0.973644	0.750431	0.493588	0.042034
Tmx1	3.5595e+06	1.144	0.711	0.855	0.689	1.059	0.668	0.194087	-0.492079	-0.226004	-0.537424	0.0827026	-0.58208	0.723369	0.100246	0.726343	0.130176	0.937856	0.0243359
Dhrs7	1.31761e+06	1.159	1.169	0.993	1.204	0.536		0.212881	0.225275	-0.0101344	0.267835	-0.899695	#VALUE!	0.852863	0.865237	0.976973	0.940163	0.0334287
Trrap	61330.5	0.924	1.761	1.348	2.32	0.466	1.1	-0.114035	0.816395	0.43082	1.21412	-1.1016	0.137504	0.967178	0.380942	0.860414	0.216524	0.157319	0.982429
Abcf2	1.67448e+06	0.943	0.936	0.892	1.103	0.949	1.015	-0.0846703	-0.0954196	-0.164884	0.141433	-0.07552	0.0214797	0.935822	0.925063	0.832362	0.974593	0.988223	0.986715
Skic2	168968	0.943	0.803	0.905	1.63	1.17	1.836	-0.0846703	-0.316528	-0.14401	0.704872	0.226509	0.876566	0.961212	0.757774	0.933901	0.7276	0.857643	0.135248
Tspyl4	174629	0.952	0.691	0.684	0.961	1.141	1.05	-0.0709665	-0.533242	-0.547932	-0.0573917	0.190299	0.0703893	0.973211	0.4404	0.546138	0.930637	0.885039	0.999853
Pdxdc1	2.3921e+06	0.966	1.428	1.406	1.298	0.872	1.094	-0.0499049	0.513996	0.491597	0.37629	-0.1976	0.129613	0.970221	0.219897	0.345417	0.758015	0.908826	0.946024
Iba57	6.53413e+06	1.784	1.091	2.01	1.249	0.648	0.856	0.835116	0.125651	1.0072	0.320773	-0.625934	-0.224317	2.96095e-05	0.946615	1.60538e-05	0.820363	0.0502312	0.570448
Cc2d1a	843721	0.971	0.92	1.031	1.529	0.747	1.146	-0.0424568	-0.120294	0.0440443	0.612588	-0.42082	0.196607	0.974209	0.923039	0.99772	0.64788	0.839893	0.934369
ATP6	9.7936e+06	0.856	1.996	1.803	1.082	0.783	0.766	-0.224317	0.997112	0.850399	0.1137	-0.352916	-0.384584	0.313697	3.04769e-10	6.48783e-05	0.960526	0.346347	0.0434947
Tuft1	1.11284e+07	1	1.091	1.191	0.653	1.076	0.768	0	0.125651	0.252173	-0.614845	0.105678	-0.380822	0.99982	0.854015	0.625064	0.00329791	0.796103	0.0625306
Vti1b	8.02522e+06	0.988	1.187	1.156	1.421	1.159	1.072	-0.0174171	0.24732	0.209141	0.506907	0.212881	0.100305	0.99982	0.682384	0.778222	0.498202	0.770487	0.965709
Itsn2	158652	0.99	0.962	1.142	0.854	1.507	1.195	-0.0144996	-0.0558912	0.191563	-0.227692	0.591679	0.257011	0.995192	0.943361	0.966763	0.857908	0.444525	0.926389
Tsc22d2	1.26974e+06	0.99	0.801	1.431	1.933	0.582	1.167	-0.0144996	-0.320126	0.517024	0.950842	-0.780909	0.222805	0.994154	0.593826	0.39508	0.153491	0.178607	0.901509
Pelo	76696	1.007	0.914	0.794	1.071	0.949	1.001	0.0100637	-0.129734	-0.332789	0.0989585	-0.07552	0.00144197	0.990505	0.901835	0.83281	0.993536	0.992455	0.984783
Sorcs2	253903	1.018	0.861	0.832	0.985	1.088	1.005	0.0257376	-0.215915	-0.265345	-0.0218044	0.121679	0.0071955	0.99982	0.794537	0.732313	0.942193	0.910502	0.983712
Ndufaf3	950992	1.031	1.175	1.205	1.195	0.971	1.053	0.0440443	0.232661	0.269033	0.257011	-0.0424568	0.0745054	0.98609	0.874333	0.852403	0.941292	0.989261	0.992836
Lzts3	216419	1.035	1.01	1.065	0.642	1.244	0.792	0.0496308	0.0143553	0.0908534	-0.639355	0.314986	-0.336428	0.98609	0.988767	0.997176	0.452439	0.775276	0.708922
Usp31	819336	1.035	0.827	0.888	1.056	1.032	1.072	0.0496308	-0.274041	-0.171368	0.0786098	0.045443	0.100305	0.987674	0.675769	0.858484	0.989425	0.949206	0.986715
Lmbrd1	2.48556e+06	1.067	0.847	0.933	1.02	1.316	1.343	0.0935602	-0.239566	-0.100051	0.0285692	0.396159	0.425459	0.930729	0.738973	0.911888	0.989425	0.372593	0.350832
Glb1	735427	1.07	0.816	0.871	1.015	1.343	1.479	0.0976108	-0.293359	-0.199255	0.0214797	0.425459	0.564622	0.961212	0.701092	0.846623	0.960526	0.55323	0.368465
Mfsd6	2.30069e+06	1.083	0.892	0.964	1.189	1.03	1.157	0.115033	-0.164884	-0.0528949	0.249749	0.0426443	0.210389	0.904283	0.874333	0.948741	0.883632	0.958874	0.865815
Pitpnb	933445	1.087	0.84	0.921	0.805	1.186	0.969	0.120352	-0.251539	-0.118727	-0.312939	0.246104	-0.0454314	0.939912	0.721302	0.911906	0.628575	0.744862	0.95009
Pea15	659440	1.097	1.129	1.267	1.682	1.026	1.726	0.133564	0.175045	0.341417	0.750178	0.0370307	0.787432	0.926722	0.947468	0.823666	0.563651	0.952109	0.0843771
Mprip	7.13425e+06	0.887	1.394	1.318	0.783	1.345	1.177	-0.172994	0.479231	0.39835	-0.352916	0.427606	0.235114	0.726069	0.0483382	0.273222	0.17393	0.116587	0.631072
Map2k6	5.13116e+06	1.112	1.182	1.308	1.034	0.764	0.876	0.153157	0.24123	0.387363	0.0482362	-0.388355	-0.190997	0.807659	0.743608	0.357714	0.994798	0.34282	0.664746
Cdc42se2	5.3979e+06	0.939	1.475	1.146	0.87	0.98	0.864	-0.0908029	0.560715	0.196607	-0.200913	-0.0291463	-0.210897	0.924471	0.0117611	0.813463	0.480134	0.993847	0.393515
Wdr44	3.15685e+06	1.126	1.071	1.169	0.942	1.138	1.187	0.171207	0.0989585	0.225275	-0.086201	0.186501	0.24732	0.798441	0.9619	0.853391	0.919329	0.803543	0.788288
C9	496881	1.138	1.166	1.413	0.711	1.908	1.356	0.186501	0.221568	0.498761	-0.492079	0.932061	0.439357	0.913777	0.93468	0.65739	0.598934	0.109786	0.754127
Cpd	986451	1.268	1.204	1.474	2.176	0.57	1.428	0.342555	0.267835	0.559737	1.12168	-0.810966	0.513996	0.683382	0.848998	0.382604	0.0653685	0.338057	0.478624
	4.49752e+06	0.906	0.973	0.861	100	0.01	1.893	-0.142417	-0.0394883	-0.215915	6.64386	-6.64386	0.920674	0.857278	0.958655	0.744045	2.67297e-16	2.21282e-16	0.00065781
Cert1	121231	0.846	1.173	0.879	1.613	1.255	1.969	-0.24127	0.230203	-0.186065	0.689746	0.327687	0.977463	0.861672	0.953854	0.919099	0.746249	0.77603	0.0876437
Apeh	4.01622e+06	1.209	0.94	1.207	1.1	1.148	1.268	0.273814	-0.0892673	0.271426	0.137504	0.199123	0.342555	0.543113	0.92122	0.683913	0.974391	0.747729	0.508668
Osbpl9	853139	1.21	1.056	1.212	0.97	1.14	1.218	0.275007	0.0786098	0.27739	-0.0439433	0.189034	0.284514	0.798441	0.989292	0.878768	0.93052	0.849457	0.850356
Letmd1	3.52043e+06	1.016	1.006	1.022	0.841	1.785	1.367	0.0229004	0.00863031	0.0313952	-0.249822	0.835924	0.451013	0.976252	0.989292	0.989372	0.746249	0.00471739	0.308605
Pklr	756012	0.688	1.173	0.71	1.154	1.794	1.422	-0.53952	0.230203	-0.494109	0.206643	0.84318	0.507921	0.303288	0.848168	0.206934	0.932017	0.0133087	0.310515
Sf3a1	2.28934e+06	1.223	0.835	0.962	1.031	1.113	1.249	0.290424	-0.260152	-0.0558912	0.0440443	0.154454	0.320773	0.726022	0.793387	0.956592	0.987083	0.880846	0.780499
Gsto1	8.10983e+06	1.235	1.09	1.332	0.911	1.044	0.863	0.304511	0.124328	0.413594	-0.134477	0.0621217	-0.212568	0.231414	0.901835	0.219876	0.820555	0.940902	0.54567
Coq8a	877074	1.297	0.909	1.179	1.131	1.031	1.217	0.375178	-0.137648	0.237564	0.177599	0.0440443	0.283329	0.638638	0.902559	0.892253	0.965393	0.945685	0.843672
Cpt2	3.45785e+06	1.4	1.06	1.406	0.677	2.161	1.438	0.485427	0.0840643	0.491597	-0.562772	1.1117	0.524064	0.134014	0.969211	0.244054	0.191585	3.93979e-05	0.162794
Dnah8	524504	1.332	0.897	1.233	1.501	0.719	1.01	0.413594	-0.15682	0.302173	0.585924	-0.475936	0.0143553	0.59366	0.901835	0.858484	0.712976	0.774642	0.986715
Mrps30	161414	1.268	1.149	1.313	0.945	3.092	2.237	0.342555	0.200379	0.392867	-0.0816138	1.62854	1.16157	0.764788	0.952657	0.874061	0.923801	0.000818779	0.0220516
Rtkn	1.48407e+06	1.48	0.798	1.075	0.812	1.099	0.852	0.565597	-0.325539	0.104337	-0.300448	0.136191	-0.231075	0.231377	0.570822	0.966763	0.62227	0.886966	0.720304
Qtrt1	87100.1	0.435	2.25	0.971	1.359	1.479	1.822	-1.20091	1.16993	-0.0424568	0.442545	0.564622	0.865523	0.00548247	0.0357185	0.968695	0.897211	0.495604	0.182815
Sarnp	3.56444e+06	0.637	2.462	1.516	100	0.01	10.477	-0.650635	1.29983	0.60027	6.64386	-6.64386	3.38915	0.00621799	2.89909e-06	0.132318	2.67297e-16	2.21282e-16	2.24357e-16
Apba1	934243	0.801	0.889	0.715	0.544	2.187	0.728	-0.320126	-0.169745	-0.483985	-0.878321	1.12895	-0.45799	0.696732	0.892941	0.288975	0.0253853	0.000930572	0.283903
Chmp2b	335976	1.075	0.865	0.959	6.516	100	100	0.104337	-0.209228	-0.0603973	2.70399	6.64386	6.64386	0.965238	0.880868	0.955295	3.46376e-06	2.21282e-16	2.24357e-16
Adgrb1	163010	0.767	2.621	1.302	0.974	1.625	0.997	-0.382702	1.39012	0.380729	-0.0380063	0.70044	-0.00433459	0.688641	0.00696319	0.882492	0.955616	0.308081	0.983612
Ipo13	23972.3	0.896	0.589	0.481	1.568	100	100	-0.158429	-0.76366	-1.05589	0.648926	6.64386	6.64386	0.936922	0.165676	0.141321	0.7276	2.21282e-16	2.24357e-16
Fdxr	253905	1.038	1.376	1.372	100		100	0.0538064	0.46048	0.45628	6.64386	#VALUE!	6.64386	0.988864	0.723863	0.823666	2.67297e-16		2.24357e-16
Gipc1	717867	1.253	1.258	1.591	100		100	0.325386	0.331132	0.669934	6.64386	#VALUE!	6.64386	0.704054	0.849013	0.377298	2.67297e-16		2.24357e-16
Mrpl39	2.9449e+06	100	0.01	1.123	0.66	1.186	0.903	6.64386	-6.64386	0.167358	-0.599462	0.246104	-0.147202	2.80253e-16	3.30088e-16	0.910026	0.145787	0.656594	0.863086
Anapc1	360000	100	0.01	1.67		0.01	0.01	6.64386	-6.64386	0.739848	#VALUE!	-6.64386	-6.64386	2.80253e-16	3.30088e-16	0.422725		2.21282e-16	2.24357e-16
Klc2	3.89475e+06	0.865	1.256	1.129		0.01	0.01	-0.209228	0.328836	0.175045	#VALUE!	-6.64386	-6.64386	0.723945	0.527536	0.862507		2.21282e-16	2.24357e-16
Tmem68	97976.1	1.297	2.075	2.8	0.01	1.193	0.01	0.375178	1.05311	1.48543	-6.64386	0.254594	-6.64386	0.704054	0.135081	0.0233663	2.67297e-16	0.83936	2.24357e-16
Klhl22	914929	0.575	1.004	0.477	1.005	1.086	0.952	-0.798366	0.00575927	-1.06794	0.0071955	0.119024	-0.0709665	0.0047405	0.996329	0.000527366	0.974391	0.89564	0.931364
Cpne7	1.12135e+06	0.437	0.791	0.397	0.958	1.03	0.949	-1.19429	-0.33825	-1.33279	-0.0619024	0.0426443	-0.07552	2.63142e-05	0.508707	2.43739e-08	0.829577	0.933686	0.884371
Itih1	1.89242e+06	0.587	1.49	0.824	0.817	1.398	1.255	-0.768568	0.575312	-0.279284	-0.291592	0.483364	0.327687	0.0190477	0.194016	0.634268	0.648982	0.301304	0.713223
Rab15	319485	0.594	1.194	0.813	0.433	0.603	0.331	-0.751465	0.255803	-0.298673	-1.20756	-0.72977	-1.5951	0.0691866	0.87553	0.76229	0.0303561	0.455701	8.15684e-07
Iqgap2	68295.5	0.664	1.386	0.837	1.006	0.876	1.065	-0.590745	0.470927	-0.2567	0.00863031	-0.190997	0.0908534	0.44666	0.753301	0.874362	0.980673	0.801904	0.949457
Als2	256155	0.701	1.466	0.945	0.93	1.371	1.3	-0.512514	0.551885	-0.0816138	-0.104697	0.455229	0.378512	0.382145	0.578066	0.954561	0.919106	0.617866	0.801994
Impdh2	87942.1	0.801	1.129	0.773	2.312	0.344	0.7	-0.320126	0.175045	-0.37146	1.20914	-1.53952	-0.514573	0.790242	0.969211	0.802278	0.187025	0.0110295	0.428335
Itpr3	1.08144e+06	2.104	0.354	0.852	1.442	0.825	1.111	1.07313	-1.49818	-0.231075	0.528071	-0.277534	0.151859	0.00237759	8.73205e-08	0.787092	0.658588	0.914344	0.957028
Anln	771800	0.707	1.355	0.8	1.327	0.795	1.039	-0.500218	0.438293	-0.321928	0.408168	-0.330973	0.0551957	0.340713	0.451065	0.64473	0.78612	0.779553	0.999853
Tubb1	395191	1.676	0.447	0.738	0.66	1.343	0.869	0.745022	-1.16165	-0.438307	-0.599462	0.425459	-0.202572	0.129498	0.00510041	0.59618	0.414698	0.548295	0.862259
Cap2	747811	11.407	0.056	0.49	26.059	0.03	0.77	3.51185	-4.15843	-1.02915	4.70371	-5.05889	-0.37707	2.80253e-16	3.30088e-16	0.00523285	2.67297e-16	2.21282e-16	0.478053
KRT17	685015	1.141	1.229	1.605	0.915	0.513	0.468	0.190299	0.297485	0.682573	-0.128156	-0.962969	-1.09542	0.89008	0.874333	0.320961	0.866538	0.0399079	0.000142671
Os9	102350	0.745	1.582	1.134	0.841	1.455	1.112	-0.424688	0.66175	0.181421	-0.249822	0.541019	0.153157	0.677401	0.532483	0.968695	0.855466	0.518024	0.978208
Pak6	195237	0.753	1.303	1.034	0.906	0.785	0.946	-0.409278	0.381837	0.0482362	-0.142417	-0.349235	-0.0800879	0.647854	0.848168	0.99674	0.907286	0.915749	0.95009
Lrrc40	624205	2.19	0.506	1.02	0.843	1.018	0.984	1.13093	-0.982791	0.0285692	-0.246395	0.0257376	-0.0232698	0.0015893	0.0162951	0.992578	0.788433	0.955686	0.980023
Spag9	946836	0.785	1.428	1.192	1.278	0.689	0.897	-0.349235	0.513996	0.253384	0.353888	-0.537424	-0.15682	0.664443	0.570822	0.888102	0.938128	0.782341	0.88771
Tnpo1	371316	0.787	1.227	0.953	1.058	0.983	1.172	-0.345564	0.295135	-0.0694519	0.0813396	-0.0247367	0.228973	0.670887	0.878574	0.955295	0.987083	0.973626	0.901509
Nhp2	163550	0.787	0.992	0.809	1.264	1.055	1.329	-0.345564	-0.011588	-0.305788	0.337996	0.077243	0.410341	0.711399	0.982994	0.759714	0.947787	0.946576	0.806898
Clptm1l	945369	1.681	0.576	1.093	1.452	1.002	0.936	0.74932	-0.795859	0.128293	0.538041	0.00288251	-0.0954196	0.0725967	0.0504542	0.966763	0.703604	0.964994	0.92228
Dhx30	460363	0.8	1.624	1.05	0.931	1.085	0.943	-0.321928	0.699552	0.0703893	-0.103147	0.117695	-0.0846703	0.709342	0.294053	0.999991	0.8927	0.906692	0.936014
Tmem132b	1.34919e+06	1.689	0.602	0.925	1.198	0.789	0.986	0.756169	-0.732165	-0.112475	0.260628	-0.341903	-0.0203404	0.0607163	0.0294359	0.914441	0.890835	0.732286	0.965709
Cstf2	427050	0.812	1.4	0.967	1.303	1.141	1.406	-0.300448	0.485427	-0.0484122	0.381837	0.190299	0.491597	0.730062	0.546546	0.961997	0.902763	0.855106	0.510528
S100a9	1.13935e+06	0.451	1.059	0.481	0.563	1.484	0.966	-1.1488	0.0827026	-1.05589	-0.828793	0.569491	-0.0499049	5.54011e-05	0.965742	0.000387761	0.0127454	0.167353	0.95009
Cald1	69835.7	0.818	0.968	0.779	0.844	1.066	0.936	-0.289827	-0.046921	-0.360305	-0.244685	0.0922074	-0.0954196	0.855108	0.952657	0.813463	0.855485	0.944701	0.935935
Gtf3c4	127679	0.818	1.421	1.262	1.347	0.767	1.121	-0.289827	0.506907	0.335712	0.42975	-0.382702	0.164786	0.809846	0.720978	0.917201	0.907	0.886966	0.972376
Arsa	1.75727e+06	0.828	1.242	1.307	1.104	0.944	0.895	-0.272297	0.312665	0.386259	0.14274	-0.0831412	-0.16004	0.644464	0.654403	0.626747	0.992251	0.998443	0.862446
Ttc3	282460	0.841	1.657	1.393	1.697	0.758	1.546	-0.249822	0.728574	0.478195	0.762987	-0.39973	0.62854	0.805197	0.289592	0.774583	0.582108	0.889412	0.304214
Ddi2	2.14295e+06	0.925	1.634	1.425	0.626	0.97	0.599	-0.112475	0.708408	0.510962	-0.675765	-0.0439433	-0.739372	0.917146	0.0616251	0.384014	0.0966777	0.988875	0.0250809
Shisa4	4.40701e+06	0.846	1.245	1.066	0.868	1.458	1.324	-0.24127	0.316146	0.0922074	-0.204233	0.543991	0.404903	0.638638	0.474645	0.946592	0.801199	0.103115	0.411412
H1f5	4.60793e+06	1.453	0.809	1.081	2.129	0.435	0.955	0.539035	-0.305788	0.112367	1.09018	-1.20091	-0.0664274	0.0300525	0.460154	0.928757	8.30293e-05	1.09325e-08	0.901509
Pcbp2	1.3588e+06	1.474	1.62	2.295	3.452	0.395	1.161	0.559737	0.695994	1.19849	1.78743	-1.34008	0.215368	0.2364	0.0862137	0.000545981	0.00015917	0.0128921	0.921851
Gys1	1.47624e+06	0.86	1.202	1.09	1.173	0.879	1.045	-0.217591	0.265437	0.124328	0.230203	-0.186065	0.0635029	0.798441	0.791361	0.959937	0.922509	0.940128	0.996873
Xkr4	71334.7	0.863	1.002	0.717	0.875	1.091	0.914	-0.212568	0.00288251	-0.479955	-0.192645	0.125651	-0.129734	0.907838	0.969211	0.667895	0.869131	0.926203	0.921851
Cd99l2	4.40497e+06	0.869	1.214	1.067	1.382	1.099	1.413	-0.202572	0.279768	0.0935602	0.466758	0.136191	0.498761	0.7372	0.645128	0.94288	0.525149	0.86195	0.15392
Mast1	527136	0.87	0.807	0.704	1.028	0.908	0.948	-0.200913	-0.309359	-0.506353	0.0398403	-0.139236	-0.077041	0.871392	0.725003	0.446229	0.974391	0.97121	0.931364
Nup188	76529.8	0.881	1.109	1.002	0.963	0.929	0.851	-0.182786	0.149259	0.00288251	-0.0543923	-0.106249	-0.232769	0.930729	0.987361	0.984009	0.94807	0.999918	0.858196
Cnih4	2.79684e+06	0.886	1.184	1.037	1.287	0.792	1.085	-0.174621	0.243669	0.0524159	0.364012	-0.336428	0.117695	0.820572	0.781224	0.989795	0.779607	0.714564	0.949457
Pgrmc2	2.72322e+06	1.088	1.055	1.124	0.8	0.839	0.657	0.121679	0.077243	0.168642	-0.321928	-0.253257	-0.606035	0.894717	0.974827	0.905702	0.636302	0.81627	0.0307528
Agap1	546802	0.895	0.955	0.913	1.243	0.735	0.848	-0.16004	-0.0664274	-0.131313	0.313826	-0.444184	-0.237864	0.896508	0.952657	0.858484	0.832514	0.178472	0.48008
Mydgf	2.87827e+06	0.904	1.16	1.046	1.185	0.904	1.082	-0.145605	0.214125	0.0648829	0.244887	-0.145605	0.1137	0.876868	0.848989	0.979993	0.896267	0.944926	0.949219
Gosr2	123070	0.904	1.752	1.418	1.442	0.629	1.11	-0.145605	0.809003	0.503858	0.528071	-0.668868	0.15056	0.930729	0.305673	0.817662	0.866257	0.624078	0.977734
Dnajc10	313301	0.924	0.913	0.832	1.049	1.106	1.074	-0.114035	-0.131313	-0.265345	0.0690147	0.145351	0.102994	0.93104	0.918715	0.829575	0.987083	0.90014	0.986592
Igha	4.66398e+06	0.704	0.903	0.635	0.733	0.904	0.69	-0.506353	-0.147202	-0.655172	-0.448115	-0.145605	-0.535332	0.0699465	0.784198	0.00873358	0.190687	0.900091	0.0083516
Vps26c	673854	0.927	1.31	1.041	1.094	0.917	1.025	-0.109359	0.389567	0.0579701	0.129613	-0.125006	0.0356239	0.930729	0.570822	0.996138	0.99749	0.992455	0.989323
Vcam1	1.35686e+06	0.931	0.962	0.894	0.957	1.258	1.136	-0.103147	-0.0558912	-0.161653	-0.0634092	0.331132	0.183963	0.90964	0.96515	0.878333	0.927195	0.539065	0.903281
Trappc6b	439362	0.94	1.115	1.023	1.532	0.754	1.134	-0.0892673	0.157044	0.0328061	0.615416	-0.407364	0.181421	0.953931	0.957497	0.987118	0.752975	0.886966	0.948011
Ranbp2	712742	0.943	1.053	0.958	0.889	0.832	0.74	-0.0846703	0.0745054	-0.0619024	-0.169745	-0.265345	-0.434403	0.946363	0.990914	0.955295	0.8371	0.944926	0.394811
Smim1	4.09872e+06	0.948	0.923	0.879	0.82	0.883	0.731	-0.077041	-0.115597	-0.186065	-0.286304	-0.179515	-0.452057	0.94135	0.898166	0.817279	0.600084	0.849799	0.0480056
CTSD	1.37361e+06	0.964	1.13	1.286	1.225	0.832	0.983	-0.0528949	0.176323	0.362891	0.292782	-0.265345	-0.0247367	0.961212	0.901835	0.672286	0.907286	0.885039	0.960739
Ccdc136	2.05734e+06	0.977	1.343	1.167	1.077	100	100	-0.0335695	0.425459	0.222805	0.107018	6.64386	6.64386	0.985762	0.388451	0.853391	0.99509	2.21282e-16	2.24357e-16
Tars2	455582	0.985	1.167	1.083	1.554	0.979	1.357	-0.0218044	0.222805	0.115033	0.635987	-0.0306192	0.440421	0.991684	0.917913	0.977871	0.733261	0.973626	0.599615
Abl2	988455	0.994	0.946	1.1	0.986	1.149	1.375	-0.00868224	-0.0800879	0.137504	-0.0203404	0.200379	0.459432	0.991684	0.939723	0.959937	0.96452	0.780852	0.548749
Lin7c	3.45537e+06	1.008	1.23	1.221	100	0.01	1.548	0.0114956	0.298658	0.288063	6.64386	-6.64386	0.630405	0.98609	0.670297	0.696134	2.67297e-16	2.21282e-16	0.0544584
Ntrk2	5.24572e+06	1.013	0.894	0.937	0.879	0.94	0.84	0.0186342	-0.161653	-0.093879	-0.186065	-0.0892673	-0.251539	0.982456	0.781224	0.926255	0.766025	0.961301	0.482764
Vmp1	1.47171e+06	1.027	1.098	1.073		1.215	1.028	0.0384362	0.134878	0.10165	#VALUE!	0.280956	0.0398403	0.985762	0.94119	0.968695		0.739542	0.991398
Slc44a2	449169	1.028	1.07	1.084	0.775	1.635	1.357	0.0398403	0.0976108	0.116365	-0.367732	0.709291	0.440421	0.985762	0.983954	0.974658	0.619989	0.186788	0.595962
Osbpl6	196444	1.03	0.954	1.024	1.003	0.977	0.978	0.0426443	-0.0679388	0.0342157	0.00432161	-0.0335695	-0.0320936	0.98769	0.952657	0.989372	0.965941	0.973626	0.972461
Dhx36	290423	1.065	1.006	1.276	1.37	0.703	0.889	0.0908534	0.00863031	0.351628	0.454176	-0.508403	-0.169745	0.958959	0.994491	0.88281	0.874319	0.751732	0.876834
Atp13a1	1.00678e+06	1.081	0.918	0.997	0.891	0.861	0.78	0.112367	-0.123434	-0.00433459	-0.166503	-0.215915	-0.358454	0.940511	0.904584	0.974658	0.835983	0.936376	0.51626
Arhgap23	422730	1.086	1.001	1.211	0.706	1.051	1.131	0.119024	0.00144197	0.276199	-0.50226	0.0717627	0.177599	0.961212	0.977198	0.923842	0.237507	0.944926	0.947433
Tor1aip1	1.95672e+06	0.698	1.209	0.864	1.157	1.348	1.521	-0.518701	0.273814	-0.210897	0.210389	0.43082	0.60502	0.11304	0.727484	0.771562	0.920509	0.346347	0.072869
Sharpin	169494	1.108	0.868	0.975	0.921	0.885	0.835	0.147958	-0.204233	-0.0365259	-0.118727	-0.176251	-0.260152	0.933081	0.892713	0.973644	0.907172	0.97529	0.809609
Sun2	554747	1.109	0.609	0.657	0.949	1.321	1.268	0.149259	-0.715486	-0.606035	-0.07552	0.40163	0.342555	0.910953	0.110708	0.213113	0.907286	0.593186	0.770632
Hap1	1.35494e+06	1.137	0.677	0.788	1.041	0.98	0.979	0.185232	-0.562772	-0.343732	0.0579701	-0.0291463	-0.0306192	0.879156	0.164834	0.518706	0.982448	0.984396	0.960526
Igh	6.29396e+06	0.607	1.236	0.875	0.634	1.479	0.876	-0.720232	0.305679	-0.192645	-0.657445	0.564622	-0.190997	6.01921e-06	0.264866	0.723684	0.000181097	0.00642583	0.557779
	410648	0.847	1.049	0.791	1.176	1.623	1.621	-0.239566	0.0690147	-0.33825	0.233888	0.698663	0.696884	0.825967	0.982356	0.634268	0.896267	0.0751939	0.0940917
Kcnb1	1.67282e+06	1.142	0.94	1.386	1.405	0.58	0.967	0.191563	-0.0892673	0.470927	0.49057	-0.785875	-0.0484122	0.867096	0.943361	0.469198	0.793421	0.292557	0.948228
Ankrd28	236632	1.151	1.013	1.31	1.391	0.787	1.111	0.202888	0.0186342	0.389567	0.476122	-0.345564	0.151859	0.894717	0.988849	0.868616	0.886412	0.920738	0.982367
Blvrb	1.43147e+07	0.839	1.251	1.109	1.058	1.275	1.64	-0.253257	0.323082	0.149259	0.0813396	0.350497	0.713696	0.154965	0.091621	0.839814	0.990615	0.17895	0.000119301
Selenot	2.49296e+06	2.563	0.448	1.13	1.804	0.976	1.709	1.35783	-1.15843	0.176323	0.851199	-0.0350469	0.773152	4.17641e-07	0.000101675	0.919099	0.0550732	0.987609	0.0332945
Crot	882975	1.159	1.241	1.445	1.045	0.962	0.991	0.212881	0.311503	0.531069	0.0635029	-0.0558912	-0.013043	0.870302	0.822848	0.479735	0.979906	0.976006	0.978208
Sacs	656604	1.16	0.906	1.043	1.08	0.811	1.016	0.214125	-0.142417	0.0607392	0.111031	-0.302226	0.0229004	0.855108	0.917913	0.996138	0.993885	0.931601	0.986715
Aip	2.57546e+06	0.942	0.84	0.832	1.977	0.55	1.123	-0.086201	-0.251539	-0.265345	0.983313	-0.862496	0.167358	0.939725	0.635147	0.623574	0.0179829	0.0193094	0.909082
Creld1	7.7665e+06	0.861	0.88	0.578	0.621	1.631	1.168	-0.215915	-0.184425	-0.790859	-0.687335	0.705757	0.22404	0.481968	0.610591	0.00155495	6.8241e-05	0.00134186	0.681345
Mtmr7	5.44804e+06	1.164	1.124	1.357	1.114	1.004	1.107	0.219091	0.168642	0.440421	0.155749	0.00575927	0.146655	0.645439	0.896839	0.232885	0.963385	0.973626	0.929375
Camk2g	4.31623e+06	1.172	0.787	0.918	0.01	100		0.228973	-0.345564	-0.123434	-6.64386	6.64386	#VALUE!	0.637518	0.375386	0.898857	2.67297e-16	2.21282e-16
Vamp1	4.65762e+06	0.676	1.254	0.859	1.194	1	1.796	-0.564905	0.326537	-0.21927	0.255803	0	0.844787	0.00118517	0.220696	0.714109	0.866503	0.973626	0.00107997
S100a4	472059	0.975	1.296	1.172	1.624	1.11	1.801	-0.0365259	0.374066	0.228973	0.699552	0.15056	0.848798	0.985762	0.787999	0.936293	0.676752	0.906692	0.0925225
Cavin2	184624	1.181	0.619	0.777	1.387	0.732	0.809	0.240009	-0.691989	-0.364013	0.471968	-0.450084	-0.305788	0.871855	0.235233	0.76229	0.8927	0.843752	0.735456
mKIAA1031	394728	1.198	0.995	0.971	1.166	1.012	1.205	0.260628	-0.00723157	-0.0424568	0.221568	0.0172093	0.269033	0.822183	0.982356	0.961997	0.982417	0.958874	0.890011
Thsd7a	2.99889e+06	1.361	0.751	1.021	0.915	1.729	1.978	0.444667	-0.413115	0.0299829	-0.128156	0.789938	0.984042	0.201814	0.359436	0.99772	0.875973	0.00770892	0.000251805
Acot1	2.21296e+06	1.216	0.984	1.089	1.058	1.002	1.496	0.282143	-0.0232698	0.123004	0.0813396	0.00288251	0.58111	0.748429	0.977198	0.959937	0.994453	0.973626	0.180494
Inpp5f	566777	1.222	1.112	1.28	1.431	0.62	0.941	0.289244	0.153157	0.356144	0.517024	-0.68966	-0.0877334	0.759036	0.958655	0.832382	0.827195	0.498144	0.936567
	253776	0.318	3.696	0.966	0.918	1.872	1.103	-1.6529	1.88596	-0.0499049	-0.123434	0.90458	0.141433	4.04645e-08	4.17087e-10	0.961997	0.866538	0.0458094	0.968101
Shisa6	587801	1.255	1.162	1.409	0.851	1.17	1.005	0.327687	0.21661	0.494672	-0.232769	0.226509	0.0071955	0.704054	0.923039	0.650505	0.355632	0.441262	0.986715
Dyrk1a	183616	100	0.01	0.945	2.731		0.954	6.64386	-6.64386	-0.0816138	1.44943	#VALUE!	-0.0679388	2.80253e-16	3.30088e-16	0.959937	0.0634619		0.95009
Myh11	2.18485e+06	1.05	0.766	1.021	1.698	1.016	2.111	0.0703893	-0.384584	0.0299829	0.763836	0.0229004	1.07793	0.947195	0.254744	0.99772	0.0278922	0.97111	4.04802e-06
Clca1	3.50927e+06	1.302	0.903	1.051	0.916	0.913	0.835	0.380729	-0.147202	0.0717627	-0.12658	-0.131313	-0.260152	0.277333	0.847968	0.964872	0.872908	0.944926	0.572388
Tmem14c	557392	1.368	1.297	1.843	1.742	0.66	1.137	0.452068	0.375178	0.882056	0.800745	-0.599462	0.185232	0.478222	0.764964	0.122104	0.526256	0.636783	0.934652
Glyctk	363203	1.395	0.966	0.997	1.267	1.24	1.542	0.480265	-0.0499049	-0.00433459	0.341417	0.31034	0.624803	0.543147	0.966245	0.973644	0.930942	0.769133	0.399299
Mars2	436540	1.406	0.765	1.08	1.099	0.889	1.117	0.491597	-0.386468	0.111031	0.136191	-0.169745	0.159629	0.463252	0.629144	0.979709	0.998978	0.976072	0.953045
Ctif	656207	1.47	1.01	1.324	0.707	1.106	0.832	0.555816	0.0143553	0.404903	-0.500218	0.145351	-0.265345	0.27006	0.992172	0.712327	0.413921	0.882257	0.721059
Hectd4	485547	1.621	0.922	1.948	0.766	1.253	0.934	0.696884	-0.117161	0.961994	-0.384584	0.325386	-0.0985055	0.11304	0.927226	0.103388	0.733946	0.708132	0.931364
Ints4	119811	1.039	2.353	1.798	1	0.907	0.972	0.0551957	1.2345	0.846393	0	-0.140826	-0.0409718	0.972794	0.0371399	0.394273	0.966204	0.988875	0.968758
Spata2l	158492	0.546	2.42	0.994	1.453	0.631	0.964	-0.873027	1.27501	-0.00868224	0.539035	-0.664288	-0.0528949	0.0556753	0.0102944	0.974313	0.854348	0.605752	0.956724
Fbll1	1.81994e+06	1.188	0.598	0.689	0.747	100	100	0.248535	-0.741783	-0.537424	-0.42082	6.64386	6.64386	0.796018	0.0149754	0.105109	0.428275	2.21282e-16	2.24357e-16
Sephs2	775875	1.981			0.837	1.11	1.033	0.986229	#VALUE!	#VALUE!	-0.2567	0.15056	0.0468403	0.00721025			0.746249	0.875685	0.999548
Ptbp3	50635	0.837	1.221	0.92	1.133	100	100	-0.2567	0.288063	-0.120294	0.180148	6.64386	6.64386	0.892151	0.940341	0.95166	0.993885	2.21282e-16	2.24357e-16
Stx17	83917.7	0.601	2.475	1.432	1.423	0.907	0.986	-0.734563	1.30743	0.518031	0.508936	-0.140826	-0.0203404	0.220257	0.0227132	0.782028	0.866538	0.989261	0.977734
Ankh	248935	0.704	3.021	2.138	1.048	0.909	0.974	-0.506353	1.59503	1.09626	0.0676387	-0.137648	-0.0380063	0.40896	0.000189472	0.127621	0.986587	0.989707	0.960848
Rab11fip2	1.19843e+06	0.986	0.971	1	0.933	100	100	-0.0203404	-0.0424568	0	-0.100051	6.64386	6.64386	0.99271	0.969211	0.983175	0.8927	2.21282e-16	2.24357e-16
Ikbkb	65068.6	1.198	1.2	1.469	100		100	0.260628	0.263034	0.554834	6.64386	#VALUE!	6.64386	0.85438	0.95354	0.76828	2.67297e-16		2.24357e-16
Rasgrp1	535824	0.779	100	100	1.195	0.778	0.912	-0.360305	6.64386	6.64386	0.257011	-0.362158	-0.132894	0.618781	3.30088e-16	2.92648e-16	0.956131	0.886966	0.89328
Wdr20rt	220567	1.069	100	100	1.284	1.294	1.745	0.0962619	6.64386	6.64386	0.360645	0.371838	0.803227	0.961465	3.30088e-16	2.92648e-16	0.93052	0.714152	0.19266
Niban2	572327	1.153	100	100	0.661	1.514	1.044	0.205393	6.64386	6.64386	-0.597278	0.598365	0.0621217	0.869091	3.30088e-16	2.92648e-16	0.277192	0.313458	0.996366
Cxnp1	1.32922e+06	1.601	0.915	1.591	0.01	0.927	0.01	0.678973	-0.128156	0.669934	-6.64386	-0.109359	-6.64386	0.10688	0.91022	0.177969	2.67297e-16	0.997978	2.24357e-16
Pdpn	31631.5	0.473	1.128	0.468	0.988	1.278	1.321	-1.08009	0.173767	-1.09542	-0.0174171	0.353888	0.40163	0.0458552	0.977198	0.105109	0.960526	0.739565	0.816896
MAPT	116515	0.514	1.761	0.931	1.094	0.742	0.788	-0.96016	0.816395	-0.103147	0.129613	-0.430509	-0.343732	0.037557	0.2742	0.946262	0.994798	0.863663	0.679162
Paqr9	43298.7	0.562	1.356	0.769	0.827	1.014	0.852	-0.831358	0.439357	-0.378944	-0.274041	0.0200577	-0.231075	0.20529	0.856277	0.803628	0.843068	0.965382	0.865733
Zfp91	1.88614e+06	2.92	0.827	1.559	2.441	0.01	0.358	1.54597	-0.274041	0.640621	1.28747	-6.64386	-1.48197	1.85839e-08	0.747662	0.214116	0.0282792	2.21282e-16	2.24357e-16
KRT14	5.89383e+06	0.848	1.848	1.611	0.96	0.397	0.359	-0.237864	0.885965	0.687956	-0.0588937	-1.33279	-1.47794	0.305053	5.09548e-09	0.00608347	0.866538	2.21282e-16	2.24357e-16
Eif2b5	1.01671e+06	1.031	1.051	1.112	0.835	0.48	0.385	0.0440443	0.0717627	0.153157	-0.260152	-1.05889	-1.37707	0.985009	0.983954	0.955295	0.705067	0.00161197	1.75422e-08
Smim26	187182	0.446	0.318	0.086	0.703	1.252	0.799	-1.16488	-1.6529	-3.53952	-0.508403	0.324235	-0.323733	0.00056579	3.20457e-09	2.92648e-16	0.323759	0.609109	0.578048
Golga2	462156	0.695	1.278	0.863	0.952	1.224	0.91	-0.524915	0.353888	-0.212568	-0.0709665	0.291604	-0.136062	0.321255	0.78598	0.858434	0.897211	0.696977	0.8829
Grm8	784994	0.698	1.202	0.931	0.853	0.772	0.889	-0.518701	0.265437	-0.103147	-0.229382	-0.373327	-0.169745	0.305581	0.82241	0.922975	0.848972	0.887652	0.865815
Sap18b	493352	2.913	0.361	1.012	1.233	1.641	1.256	1.54251	-1.46993	0.0172093	0.302173	0.714575	0.328836	6.38445e-06	0.00016088	0.985993	0.945886	0.208314	0.801611
Rbm8a	363174	0.621	0.851	0.553	0.977	0.769	0.799	-0.687335	-0.232769	-0.854649	-0.0335695	-0.378944	-0.323733	0.131224	0.865237	0.0904199	0.946874	0.879104	0.624104
Fam98b	520653	0.712	1.365	1.044	1.164	0.807	1.146	-0.490051	0.448901	0.0621217	0.219091	-0.309359	0.196607	0.379056	0.35584	0.991011	0.919269	0.815328	0.92519
Nup54	462234	0.741	1.628	1.11	1.146	0.5	0.408	-0.432455	0.703101	0.15056	0.196607	-1	-1.29336	0.520718	0.242196	0.968695	0.993318	0.128439	4.42986e-05
Prdx4	4.83599e+06	1.331	0.869	1.156	0.305	1.024	0.786	0.412511	-0.202572	0.209141	-1.71312	0.0342157	-0.347399	0.161736	0.731224	0.787921	1.07958e-12	0.964895	0.169464
Becn1	175109	0.724	1.171	0.732	0.906	0.519	0.451	-0.465938	0.227741	-0.450084	-0.142417	-0.946194	-1.1488	0.554912	0.932059	0.682151	0.896336	0.257455	0.00549405
Zc3hc1	63421.1	0.999	1.332	1.316	0.778	0.59	0.449	-0.00144342	0.413594	0.396159	-0.362158	-0.761213	-1.15521	0.992929	0.862994	0.877766	0.784461	0.515807	0.00911646
Numa1	1.51018e+06	0.73	1.423	0.837	0.761	1.092	0.948	-0.454032	0.508936	-0.2567	-0.394032	0.126973	-0.077041	0.264197	0.227357	0.739908	0.437602	0.885039	0.901509
Nhsl2	401016	1.557	0.476	0.735	1.12	0.94	1.01	0.638769	-1.07097	-0.444184	0.163499	-0.0892673	0.0143553	0.264197	0.0152809	0.589709	0.993885	0.991332	0.986715
Grid1	506519	1.406	0.55	0.837	0.894	1.178	1.157	0.491597	-0.862496	-0.2567	-0.161653	0.23634	0.210389	0.429111	0.0424688	0.817279	0.869039	0.797637	0.919267
Rgs20	1.86967e+06	0.78	1.062	0.816	1.096	0.832	0.926	-0.358454	0.0867838	-0.293359	0.132248	-0.265345	-0.110916	0.313697	0.958296	0.551459	0.977036	0.828364	0.890011
Mtmr2	1.58568e+06	0.781	1.5	1.245	1.578	0.742	1.08	-0.356606	0.584963	0.316146	0.658097	-0.430509	0.111031	0.426976	0.140656	0.781738	0.237804	0.674299	0.960694
Cdkn2aip	201702	0.784	0.978	0.777	0.949	1.136	1.119	-0.351074	-0.0320936	-0.364013	-0.07552	0.183963	0.16221	0.704054	0.969211	0.748772	0.923801	0.887725	0.970708
Vldlr	355893	1.069	0.569	0.696	1.246	0.689	0.759	0.0962619	-0.813499	-0.522841	0.317304	-0.537424	-0.397828	0.966735	0.0927598	0.456908	0.941292	0.740105	0.51626
Asap2	1.31072e+06	0.824	1.445	1.049	1.247	0.773	0.88	-0.279284	0.531069	0.0690147	0.318461	-0.37146	-0.184425	0.696732	0.263908	0.977871	0.866538	0.732286	0.799212
Camk2g	8.94477e+06	0.83	0.88	0.764	0.786	1.143	0.907	-0.268817	-0.184425	-0.388355	-0.347399	0.192825	-0.140826	0.217188	0.542536	0.111932	0.169878	0.665003	0.762881
Phkb	501489	1.033	0.983	1.028	1.598	0.406	0.843	0.0468403	-0.0247367	0.0398403	0.676267	-1.30045	-0.246395	0.982456	0.97273	0.995853	0.64788	0.0168605	0.766659
Rrbp1	153495	0.924	0.392	0.607	0.775	1.002	0.596	-0.114035	-1.35107	-0.720232	-0.367732	0.00288251	-0.746616	0.955985	0.00131954	0.268261	0.739524	0.960968	0.0461911
Tceal6	1.99633e+06	0.84	0.997	0.841	0.997	1.054	1.079	-0.251539	-0.00433459	-0.249822	-0.00433459	0.0758749	0.109695	0.704054	0.989193	0.65095	0.969169	0.93416	0.981728
Mtmr12	84592.7	0.846	1.006	0.836	0.9	1.086	0.963	-0.24127	0.00863031	-0.258425	-0.152003	0.119024	-0.0543923	0.88828	0.969211	0.878768	0.896907	0.930549	0.956724
Dock7	165118	0.924	1.225	1.189	1.915	0.452	0.868	-0.114035	0.292782	0.249749	0.937344	-1.14561	-0.204233	0.947195	0.91074	0.943445	0.511923	0.093433	0.868527
Uap1l1	479108	0.956	0.994	0.975	1.022	0.913	0.61	-0.0649175	-0.00868224	-0.0365259	0.0313952	-0.131313	-0.713119	0.970221	0.980516	0.968695	0.966324	0.995485	0.0869963
Mapt	3.40156e+06	0.856	1.129	0.987	0.924	0.999	0.909	-0.224317	0.175045	-0.018878	-0.114035	-0.00144342	-0.137648	0.722509	0.896839	0.973644	0.893141	0.973626	0.866577
Vta1	2.87899e+06	1.08	1.014	0.973	0.78	0.934	0.627	0.111031	0.0200577	-0.0394883	-0.358454	-0.0985055	-0.673463	0.902885	0.998187	0.959937	0.512914	0.973626	0.0202038
Ntng1	1.43427e+06	0.861	0.977	0.82	1.055	0.793	0.906	-0.215915	-0.0335695	-0.286304	0.077243	-0.334607	-0.142417	0.799037	0.978579	0.661897	0.987083	0.802622	0.876834
Tbcd	1.33401e+06	0.862	1.169	1.033	1.091	0.971	0.935	-0.21424	0.225275	0.0468403	0.125651	-0.0424568	-0.0969617	0.847928	0.888085	0.992578	0.982392	0.98981	0.901509
Pak2	5.70133e+06	0.864	0.998	0.921	0.766	1.34	1.052	-0.210897	-0.00288828	-0.118727	-0.384584	0.422233	0.0731347	0.690475	0.986582	0.892055	0.199708	0.124222	0.976528
Nav1	266870	0.866	1.146	1.203	1.5	0.617	0.907	-0.207561	0.196607	0.266637	0.584963	-0.696658	-0.140826	0.85209	0.949021	0.933901	0.827225	0.589595	0.901509
Arhgap5	1.21252e+06	0.873	1.504	1.066	1.242	0.744	0.876	-0.195946	0.588805	0.0922074	0.312665	-0.426625	-0.190997	0.847928	0.16416	0.976973	0.866538	0.673974	0.785252
Nrbp2	2.41769e+06	0.875	1.179	1.035	1.157	1	1.228	-0.192645	0.237564	0.0496308	0.210389	0	0.296311	0.795659	0.835167	0.99674	0.922509	0.973626	0.691002
Heatr5b	1.01521e+06	0.876	1.061	1.039	1.507	0.731	0.944	-0.190997	0.0854247	0.0551957	0.591679	-0.452057	-0.0831412	0.855108	0.974827	0.994979	0.620399	0.688824	0.929375
Fam162a	2.07205e+06	0.877	1.385	1.205				-0.189351	0.469886	0.269033	#VALUE!	#VALUE!	#VALUE!	0.799037	0.28136	0.83367
Rab11fip5	1.74237e+06	0.849	1.139	0.726	1.2	0.35	0.634	-0.236164	0.187768	-0.461959	0.263034	-1.51457	-0.657445	0.711064	0.895657	0.343492	0.904025	2.83182e-06	0.0225709
Tgfb1i1	3.6462e+06	5.478	0.612	3.085	0.788	0.883	0.639	2.45365	-0.708396	1.62527	-0.343732	-0.179515	-0.646112	2.80253e-16	0.0411107	6.06653e-11	0.569428	0.920389	0.0185268
Ech1	2.06289e+06	1.153	1.232	1.479	1.214	0.613	0.641	0.205393	0.301002	0.564622	0.279768	-0.706041	-0.641604	0.836261	0.72127	0.273647	0.888655	0.096246	0.0248777
Nrdc	290272	0.897	0.917	0.865	0.921	0.967	0.895	-0.15682	-0.125006	-0.209228	-0.118727	-0.0484122	-0.16004	0.89551	0.923141	0.88157	0.91007	0.973626	0.885001
Hmg20a	670875	0.899	1.131	1.014	1.652	0.735	1.207	-0.153607	0.177599	0.0200577	0.724214	-0.444184	0.271426	0.892151	0.921831	0.989372	0.414613	0.796103	0.876834
Rapgef1	251425	0.901	1.151	1.039	1.014	1.023	1.03	-0.150401	0.202888	0.0551957	0.0200577	0.0328061	0.0426443	0.912151	0.944059	0.992578	0.966324	0.955654	0.991398
Mpp1	2.36538e+06	0.928	1.064	0.987		0.655	0.656	-0.107803	0.0894982	-0.018878	#VALUE!	-0.610433	-0.608232	0.915268	0.968904	0.973644		0.286745	0.0407492
Psph	2.08197e+06	0.907	1.146	1.044	0.949	1.234	1.158	-0.140826	0.196607	0.0621217	-0.07552	0.303342	0.211635	0.885085	0.895657	0.989372	0.922509	0.588983	0.876834
Dcdc2a	3.2028e+06	2.335	0.503	1.205	0.727	0.891	0.676	1.22342	-0.99137	0.269033	-0.459973	-0.166503	-0.564905	7.80964e-08	0.000530056	0.774583	0.330204	0.924845	0.0499315
Gc	361948	0.913	1.046	1.015	0.847	0.938	0.692	-0.131313	0.0648829	0.0214797	-0.239566	-0.0923402	-0.531156	0.924471	0.998109	0.987111	0.838059	0.991332	0.300887
Armcx3	794295	0.914	1.053	1	1.187	0.752	0.904	-0.129734	0.0745054	0	0.24732	-0.411195	-0.145605	0.914535	0.981948	0.97882	0.960526	0.802622	0.876834
Hsdl1	1.94253e+06	1.221	1.063	1.238	1.016	0.697	0.688	0.288063	0.0881416	0.308011	0.0229004	-0.520769	-0.53952	0.697975	0.966245	0.72994	0.987083	0.339997	0.0848518
Bpnt2	1.55306e+06	0.922	0.982	0.959	0.93	0.862	0.842	-0.117161	-0.0262051	-0.0603973	-0.104697	-0.21424	-0.248108	0.910229	0.980101	0.940855	0.870275	0.924845	0.691002
Scrn2	713112	0.925	0.997	0.948	1.043	0.93	0.962	-0.112475	-0.00433459	-0.077041	0.0607392	-0.104697	-0.0558912	0.926456	0.989292	0.948741	0.98433	0.992455	0.947433
Hspb1	238729	0.926	0.941	0.902	1.61	0.781	1.239	-0.110916	-0.0877334	-0.148801	0.687061	-0.356606	0.309176	0.931819	0.948732	0.907759	0.687574	0.923344	0.858488
Ncbp1	323480	0.927	1.258	1.156	1.432	0.565	0.857	-0.109359	0.331132	0.209141	0.518031	-0.823677	-0.222633	0.933702	0.863329	0.957427	0.856399	0.443925	0.842637
Higd1a	303170	0.927	1.71	1.648	1.782	0.929	1.459	-0.109359	0.773996	0.720716	0.833497	-0.106249	0.54498	0.930729	0.268944	0.48973	0.567425	0.996944	0.599615
Ppp2r2c	1.34317e+06	0.928	0.881	0.841	0.854	1.011	0.83	-0.107803	-0.182786	-0.249822	-0.227692	0.015783	-0.268817	0.924744	0.881979	0.736011	0.745557	0.964994	0.65092
Mpp3	948350	0.928	1.009	0.978	0.893	0.815	1.071	-0.107803	0.0129262	-0.0320936	-0.163268	-0.295128	0.0989585	0.906579	0.994722	0.961997	0.82935	0.924845	0.985903
Mcam	1.22046e+06	0.932	0.851	0.823	0.84	1.169	0.99	-0.101598	-0.232769	-0.281036	-0.251539	0.225275	-0.0144996	0.94135	0.798062	0.682151	0.726888	0.746512	0.968917
Gpt	3.15065e+06	0.936	1.089	0.997	0.845	1.072	0.927	-0.0954196	0.123004	-0.00433459	-0.242977	0.100305	-0.109359	0.930729	0.948634	0.977871	0.762338	0.904557	0.890011
Frmd8	192740	0.936	1.243	1.246	1.292	1.142	1.428	-0.0954196	0.313826	0.317304	0.369606	0.191563	0.513996	0.953162	0.894992	0.915769	0.92065	0.875685	0.570344
Ppp6r1	308788	0.94	1.037	1.005	0.906	1.281	1.054	-0.0892673	0.0524159	0.0071955	-0.142417	0.35727	0.0758749	0.955985	0.998945	0.974658	0.855466	0.625086	0.986715
Tstd3	1.25387e+06	0.94	1.286	1.299	0.991	0.895	0.798	-0.0892673	0.362891	0.377401	-0.013043	-0.16004	-0.325539	0.939317	0.598405	0.716362	0.946874	0.971015	0.605775
Mri1	238706	0.942	0.958	0.851	1.347	1.096	1.593	-0.086201	-0.0619024	-0.232769	0.42975	0.132248	0.671746	0.941689	0.961548	0.817793	0.727574	0.889535	0.116176
Ube2r2	345484	0.945	1.102	1	0.95	0.835	0.8	-0.0816138	0.140124	0	-0.0740006	-0.260152	-0.321928	0.947372	0.969211	0.973644	0.930553	0.960082	0.679665
Sav1	7.0995e+06	1.038	0.956	0.949	0.771	0.841	0.721	0.0538064	-0.0649175	-0.07552	-0.375197	-0.249822	-0.471929	0.939708	0.920053	0.931651	0.218344	0.673974	0.0185268
Arl2	459550	0.948	1.317	1.296	1.345	0.611	0.878	-0.077041	0.397255	0.374066	0.427606	-0.710756	-0.187707	0.961212	0.765207	0.851013	0.87692	0.587533	0.858817
Amer2	760794	0.95	0.923	0.877	0.848	1.014	0.853	-0.0740006	-0.115597	-0.189351	-0.237864	0.0200577	-0.229382	0.961212	0.917913	0.856346	0.746249	0.965382	0.662657
Lrrc8a	1.14222e+06	0.95	1.218	1.13	1.757	0.691	1.073	-0.0740006	0.284514	0.176323	0.813114	-0.533242	0.10165	0.953162	0.838813	0.923434	0.358203	0.622661	0.986592
Smad4	736273	0.957	0.976	0.957	1.334	1.029	1.542	-0.0634092	-0.0350469	-0.0634092	0.415759	0.041243	0.624803	0.961212	0.974827	0.955295	0.866538	0.94865	0.242582
Lcp1	1.39183e+06	0.96	1.059	1.028	1.019	0.885	0.879	-0.0588937	0.0827026	0.0398403	0.0271541	-0.176251	-0.186065	0.970221	0.969211	0.99772	0.987083	0.955686	0.8111
Tagln2	160812	0.963	1.335	1.098	0.934	1.164	1.247	-0.0543923	0.41684	0.134878	-0.0985055	0.219091	0.318461	0.976902	0.848168	0.980585	0.912606	0.823347	0.843672
Tcerg1	1.64709e+06	0.967	1.017	1.016	0.968	0.859	0.863	-0.0484122	0.0243197	0.0229004	-0.046921	-0.21927	-0.212568	0.972063	0.998109	0.989212	0.94807	0.889535	0.729138
Arl6ip1	1.17511e+07	0.97	1.222	1.116	1.338	0.969	1.212	-0.0439433	0.289244	0.158337	0.420078	-0.0454314	0.27739	0.947696	0.271055	0.84535	0.523763	0.987609	0.653915
Zfp638	127473	0.971	1.005	0.966	0.961	1.106	1.066	-0.0424568	0.0071955	-0.0499049	-0.0573917	0.145351	0.0922074	0.991684	0.971526	0.966763	0.945585	0.915555	0.996171
Ptgr3	3.78757e+06	0.972	0.939	0.926	0.96	1.046	1.119	-0.0409718	-0.0908029	-0.110916	-0.0588937	0.0648829	0.16221	0.977439	0.915536	0.919099	0.933576	0.944926	0.916663
Sart1	8.80861e+06	0.805	1.78	1.329	0.887	0.825	0.753	-0.312939	0.831877	0.410341	-0.172994	-0.277534	-0.409278	0.109907	3.69814e-07	0.213072	0.692343	0.611587	0.0419237
Rbmx	3.53053e+06	0.977	1.037	0.987	1.355	0.786	1.084	-0.0335695	0.0524159	-0.018878	0.438293	-0.347399	0.116365	0.98609	0.989292	0.976973	0.661565	0.649671	0.945828
GRK6	523699	0.978	0.894	0.831	0.855	1.088	0.896	-0.0320936	-0.161653	-0.26708	-0.226004	0.121679	-0.158429	0.985762	0.901835	0.802597	0.79213	0.90014	0.876834
Pycr3	6.33403e+06	1.017	1.078	1.082	1.491	0.68	1.081	0.0243197	0.108357	0.1137	0.57628	-0.556393	0.112367	0.972063	0.921259	0.933901	0.194757	0.0827613	0.934199
Oplah	2.98761e+06	0.981	1.064	1.054	1.007	1.147	1.042	-0.027675	0.0894982	0.0758749	0.0100637	0.197865	0.0593553	0.988713	0.972195	0.973644	0.976184	0.755748	0.986715
Slc25a15	175732	0.982	0.928	0.862	1.167	0.784	0.963	-0.0262051	-0.107803	-0.21424	0.222805	-0.351074	-0.0543923	0.991684	0.929982	0.878768	0.989454	0.924845	0.956034
Lrrtm1	1.88555e+06	0.983	0.971	0.963	1.152	0.78	0.96	-0.0247367	-0.0424568	-0.0543923	0.204141	-0.358454	-0.0588937	0.974209	0.971023	0.938494	0.929882	0.608473	0.941263
Rad23a	420712	0.99	1.176	1.438	1.074	1.004	1.077	-0.0144996	0.233888	0.524064	0.102994	0.00575927	0.107018	0.992929	0.904584	0.633491	0.994798	0.960968	0.984783
Prrc2a	209347	0.992	0.941	0.826	0.632	1.724	1.474	-0.011588	-0.0877334	-0.275786	-0.662004	0.78576	0.559737	0.99271	0.943315	0.839632	0.212763	0.124222	0.364877
Ptprn	2.72262e+06	1	0.894	1.016	1.067	0.89	1.138	0	-0.161653	0.0229004	0.0935602	-0.168123	0.186501	0.99982	0.884424	0.995162	0.994798	0.938248	0.890011
Igbp1	342548	1.002	1.053	1.07	0.8	1.1	0.888	0.00288251	0.0745054	0.0976108	-0.321928	0.137504	-0.171368	0.991684	0.998187	0.992578	0.796638	0.921948	0.890011
Tmem63b	512367	1.008	1.075	1.074	0.923	1.029	0.97	0.0114956	0.104337	0.102994	-0.115597	0.041243	-0.0439433	0.99982	0.978579	0.981392	0.877219	0.948511	0.957483
Agap3	3.13832e+06	1.013	1.049	1.048	1.126	0.882	0.987	0.0186342	0.0690147	0.0676387	0.171207	-0.181149	-0.018878	0.98609	0.985698	0.979709	0.951614	0.895837	0.972461
ATP8	1.16249e+07	1.017	1.128	1.135	0.952	0.964	0.91	0.0243197	0.173767	0.182692	-0.0709665	-0.0528949	-0.136062	0.968043	0.690285	0.794714	0.866538	0.987609	0.754127
Carmil2	2.77554e+06	1.018	1.112	1.08	0.971	0.998	0.809	0.0257376	0.153157	0.111031	-0.0424568	-0.00288828	-0.305788	0.985762	0.90916	0.955295	0.951614	0.988875	0.424626
Abcf1	1.08098e+06	1.019	0.961	1.027	1	0.994	1.049	0.0271541	-0.0573917	0.0384362	0	-0.00868224	0.0690147	0.991684	0.958655	0.99674	0.953766	0.973626	0.999548
Crat	4.6922e+06	1.028	0.95	0.955	1.036	1.096	1.086	0.0398403	-0.0740006	-0.0664274	0.051024	0.132248	0.119024	0.961212	0.907479	0.939592	0.998267	0.817437	0.920077
Gga1	1.53267e+06	1.03	0.974	0.992	0.84	0.924	1.098	0.0426443	-0.0380063	-0.011588	-0.251539	-0.114035	0.134878	0.972794	0.9605	0.973644	0.748625	0.972921	0.956586
Sema7a	3.57764e+06	1.031	0.927	0.953	0.896	0.915	0.844	0.0440443	-0.109359	-0.0694519	-0.158429	-0.128156	-0.244685	0.961212	0.898166	0.95288	0.865951	0.944952	0.628521
Pdzd8	1.29867e+06	1.033	0.798	0.801	1.289	0.834	1.005	0.0468403	-0.325539	-0.320126	0.366252	-0.261881	0.0071955	0.979114	0.609178	0.634268	0.801667	0.889446	0.983544
Tra2b	711375	1.035	1.031	0.996	1.028	0.827	0.837	0.0496308	0.0440443	-0.00578235	0.0398403	-0.274041	-0.2567	0.954103	0.993253	0.973644	0.993885	0.861426	0.411461
Elavl2	4.66705e+06	1.037	0.968	1.013	0.885	0.954	0.934	0.0524159	-0.046921	0.0186342	-0.176251	-0.0679388	-0.0985055	0.951481	0.961548	0.992578	0.800669	0.973626	0.882512
Smyd5	4.64397e+06	1.037	0.959	0.991	0.969	0.794	0.769	0.0524159	-0.0603973	-0.013043	-0.0454314	-0.332789	-0.378944	0.952351	0.942995	0.989372	0.930942	0.47215	0.140579
Fto	880488	1.038	0.942	1.021	0.902	1.174	1.106	0.0538064	-0.086201	0.0299829	-0.148801	0.231432	0.145351	0.98609	0.943361	0.992578	0.866538	0.806232	0.959455
Rars2	754926	1.043	0.716	0.732	1.044	1.209	1.102	0.0607392	-0.481969	-0.450084	0.0621217	0.273814	0.140124	0.982456	0.293437	0.393034	0.982297	0.740105	0.968101
Kit	558758	1.043	1.28	1.479	1.259	0.817	1.007	0.0607392	0.356144	0.564622	0.332278	-0.291592	0.0100637	0.972794	0.800684	0.554777	0.687736	0.571155	0.986715
Macroh2a3	3.02378e+06	1.045	0.985	0.994	1.383	0.843	1.162	0.0635029	-0.0218044	-0.00868224	0.467801	-0.246395	0.21661	0.959112	0.97273	0.979993	0.600335	0.828391	0.842179
Nudt18	1.09628e+06	1.051	0.976	0.984	0.92	1.067	0.977	0.0717627	-0.0350469	-0.0232698	-0.120294	0.0935602	-0.0335695	0.96641	0.973071	0.973644	0.866538	0.924845	0.960526
Lsm8	1.80956e+06	1.051	1.054	1.059	1.076	1.042	1.045	0.0717627	0.0758749	0.0827026	0.105678	0.0593553	0.0635029	0.961212	0.974443	0.979709	0.990026	0.94865	0.994541
Cbarp	282120	1.051	0.689	0.736	1.469	0.829	1.164	0.0717627	-0.537424	-0.442222	0.554834	-0.270556	0.219091	0.985762	0.35041	0.586616	0.796638	0.947773	0.901509
Strada	805373	1.052	1.348	1.292	1.86	0.513	0.968	0.0731347	0.43082	0.369606	0.895303	-0.962969	-0.046921	0.972794	0.57558	0.759714	0.291457	0.145361	0.957028
Marchf5	696013	1.058	1.132	1.219	1.465	0.725	1.062	0.0813396	0.178874	0.285698	0.550901	-0.463947	0.0867838	0.961212	0.943361	0.858164	0.770063	0.791528	0.986715
Mrps9	107472	1.059	0.749	0.779	0.855	1.104	0.959	0.0827026	-0.416962	-0.360305	-0.226004	0.14274	-0.0603973	0.961212	0.59901	0.792276	0.866538	0.918191	0.953045
Stt3a	2.60385e+06	1.059	0.723	0.88	1.037	0.801	0.84	0.0827026	-0.467932	-0.184425	0.0524159	-0.320126	-0.251539	0.961212	0.335051	0.83367	0.994453	0.740753	0.682236
Agtpbp1	136446	1.06	0.946	0.943	1.085	0.91	1.003	0.0840643	-0.0800879	-0.0846703	0.117695	-0.136062	0.00432161	0.961212	0.929002	0.955295	0.994798	0.985431	0.983544
Brox	246459	1.064	1.256	1.481	3.398	0.476	2.026	0.0894982	0.328836	0.566572	1.76469	-1.07097	1.01863	0.971613	0.894429	0.6981	0.0119379	0.188483	0.0650926
Snx12	2.76705e+06	1.073	1.225	1.237	1.394	0.999	1.084	0.10165	0.292782	0.306846	0.479231	-0.00144342	0.116365	0.894717	0.433006	0.590221	0.663811	0.970428	0.978916
Ube2z	5.12737e+06	1.081	0.979	1.046	0.964	0.982	0.89	0.112367	-0.0306192	0.0648829	-0.0528949	-0.0262051	-0.168123	0.866627	0.95354	0.973644	0.928936	0.999918	0.700118
Hecw2	1.30331e+06	1.081	0.969	0.979	1.67	0.841	1.242	0.112367	-0.0454314	-0.0306192	0.739848	-0.249822	0.312665	0.939296	0.968127	0.970806	0.355977	0.948416	0.797375
Elmod1	2.46704e+06	1.087	0.976	1.109	1.021	0.78	0.819	0.120352	-0.0350469	0.149259	0.0299829	-0.358454	-0.288065	0.895937	0.972195	0.936143	0.989454	0.665233	0.532756
Rab39b	4.08646e+06	1.089	0.997	0.998	0.967	1.103	1.07	0.123004	-0.00433459	-0.00288828	-0.0484122	0.141433	0.0976108	0.88394	0.989284	0.977871	0.928936	0.831974	0.960694
Scfd2	421788	1.092	0.74	1.039	1.652	0.726	1.406	0.126973	-0.434403	0.0551957	0.724214	-0.461959	0.491597	0.931664	0.544355	0.994889	0.204053	0.778282	0.501166
H1f3	5.60449e+06	0.819	1.279	1.016	1.306	1.119	1.476	-0.288065	0.355016	0.0229004	0.385155	0.16221	0.561693	0.427908	0.268944	0.992578	0.238609	0.707386	0.00164361
Abcf3	750190	1.102	1.047	1.178	1.119	0.701	0.793	0.140124	0.0662614	0.23634	0.16221	-0.512514	-0.334607	0.930729	0.985969	0.892943	0.993398	0.617866	0.532756
Ppp2r5b	4.02762e+06	0.895	1.189	0.967	0.988	1.34	1.502	-0.16004	0.249749	-0.0484122	-0.0174171	0.422233	0.586885	0.831547	0.765173	0.959937	0.963385	0.308081	0.0578684
Prelid3a	5.96142e+06	1.106	0.874	1.056	0.986	1.213	1.037	0.145351	-0.194295	0.0786098	-0.0203404	0.27858	0.0524159	0.798441	0.736703	0.966325	0.963083	0.62598	0.986715
Mff	3.30672e+06	1.11	1.092	1.269	0.852	1.392	1.182	0.15056	0.126973	0.343692	-0.231075	0.477159	0.24123	0.847746	0.932059	0.593776	0.746249	0.298664	0.890011
Gtf2i	1.03891e+06	1.112	0.928	1.197	1.322	1.078	1.033	0.153157	-0.107803	0.259423	0.402722	0.108357	0.0468403	0.908424	0.915231	0.868871	0.852472	0.915555	0.999548
Tra2a	2.49608e+06	1.113	0.905	0.982	1.131	0.783	0.912	0.154454	-0.14401	-0.0262051	0.177599	-0.352916	-0.132894	0.858104	0.896839	0.968695	0.94807	0.674802	0.871453
Nt5m	963953	1.118	1.271	1.553	1.503	0.687	1.1	0.16092	0.345964	0.635058	0.587845	-0.541618	0.137504	0.90964	0.804933	0.301379	0.699098	0.692535	0.96915
Xpnpep3	1.64995e+06	1.127	1.135	1.342	1.27	0.929	1.375	0.172488	0.182692	0.424385	0.344828	-0.106249	0.459432	0.89008	0.902559	0.575269	0.887074	0.999918	0.531153
Ipo11	1.12448e+06	1.146	1.151	1.217	1.302	0.853	1.145	0.196607	0.202888	0.283329	0.380729	-0.229382	0.195348	0.87666	0.898166	0.843871	0.847786	0.929869	0.929375
Prkra	1.86814e+06	1.149	0.979	1.12	1.636	0.804	1.261	0.200379	-0.0306192	0.163499	0.710173	-0.314733	0.334568	0.81897	0.972962	0.929657	0.171533	0.761296	0.611599
H2ac20	2.76779e+06	0.73	0.524	0.525	0.724	1.533	1.268	-0.454032	-0.932361	-0.929611	-0.465938	0.616358	0.342555	0.151653	1.5409e-07	3.45107e-05	0.0124313	0.0369721	0.352829
Kcnq2	1.28052e+06	1.156	0.84	0.823	1.175	0.882	0.991	0.209141	-0.251539	-0.281036	0.232661	-0.181149	-0.013043	0.85209	0.729247	0.694727	0.910524	0.924845	0.977734
Ces1c	1.19835e+06	0.737	1.606	1.147	1.027	0.735	0.952	-0.440263	0.683472	0.197865	0.0384362	-0.444184	-0.0709665	0.444003	0.0947814	0.923434	0.974391	0.809495	0.933557
Tbc1d9b	1.15214e+06	1.17	0.94	1.109	1.249	0.928	1.15	0.226509	-0.0892673	0.149259	0.320773	-0.107803	0.201634	0.837219	0.927868	0.95288	0.897732	0.989261	0.92228
Mmab	2.35586e+06	1.171	0.905	1.108	1.224	1.047	1.441	0.227741	-0.14401	0.147958	0.291604	0.0662614	0.52707	0.768817	0.895657	0.936143	0.866538	0.944926	0.337509
Ado	2.16044e+06	1.177	0.769	0.977	1.126	0.863	1.008	0.235114	-0.378944	-0.0335695	0.171207	-0.212568	0.0114956	0.77021	0.402155	0.956005	0.95712	0.904099	0.986592
1810009N02Rik	1.60707e+06	1.19	0.907	1.099	1.127	0.748	0.849	0.250962	-0.140826	0.136191	0.172488	-0.41889	-0.236164	0.796018	0.903409	0.95288	0.987083	0.636783	0.738774
Sh3glb1	1.68691e+06	1.204	1.11	1.301	0.813	1.125	0.869	0.267835	0.15056	0.379621	-0.298673	0.169925	-0.202572	0.768817	0.923141	0.671876	0.691862	0.85798	0.811168
Mpdz	301653	1.205	0.937	1.113	1.136	0.809	0.943	0.269033	-0.093879	0.154454	0.183963	-0.305788	-0.0846703	0.847928	0.943361	0.973644	0.991683	0.944926	0.943203
Lin7b	4.55556e+06	1.001	1.134	1.002	0.942	1.743	1.772	0.00144197	0.181421	0.00288251	-0.086201	0.801573	0.825379	0.992409	0.852481	0.999231	0.917345	0.0142063	0.00348161
Arhgef12	1.11999e+06	1.209	0.894	1.097	0.831	1.098	0.906	0.273814	-0.161653	0.133564	-0.26708	0.134878	-0.142417	0.776667	0.885331	0.959937	0.7276	0.883427	0.880027
Tmsb4x	3.23536e+07	1.035	1.639	1.671	0.85	1.24	1.019	0.0496308	0.712816	0.740712	-0.234465	0.31034	0.0271541	0.900355	5.62147e-09	4.73484e-07	0.766448	0.571155	0.999853
Cldn10	3.54078e+06	1.223	0.835	1.055	1.219	0.755	0.936	0.290424	-0.260152	0.077243	0.285698	-0.405451	-0.0954196	0.480201	0.602253	0.973644	0.866538	0.609109	0.901509
Nell2	3.12086e+06	1.171	0.988	1.69	0.887	0.87	0.767	0.227741	-0.0174171	0.757023	-0.172994	-0.200913	-0.382702	0.718052	0.983954	0.0106452	0.827195	0.889412	0.32774
Smarcc1	6.66263e+06	1.064	0.84	0.882	0.572	1.982	1.057	0.0894982	-0.251539	-0.181149	-0.805913	0.986957	0.0799754	0.89008	0.455568	0.735093	0.00502016	3.07413e-05	0.977734
Rtn4ip1	1.80705e+06	1.259	0.864	0.923	0.935	1.179	1.058	0.332278	-0.210897	-0.115597	-0.0969617	0.237564	0.0813396	0.647854	0.832761	0.890607	0.91007	0.731524	0.986715
Mtfp1	3.53856e+06	1.264	0.746	1.056	1.145	0.947	0.996	0.337996	-0.422752	0.0786098	0.195348	-0.0785637	-0.00578235	0.542364	0.341969	0.970806	0.928936	0.9889	0.978208
Ggact	1.82059e+06	1.265	1.2	1.553	0.85	0.677	0.655	0.339137	0.263034	0.635058	-0.234465	-0.562772	-0.610433	0.633786	0.888085	0.189084	0.770235	0.471292	0.116489
Adgrl2	673582	1.277	1.155	1.353	1.662	0.689	1.155	0.352759	0.207893	0.436162	0.73292	-0.537424	0.207893	0.662866	0.925063	0.708801	0.609961	0.768524	0.92228
Ncoa6	1.027e+06	1.027	2.447	2.296	2.843	0.67	1.474	0.0384362	1.29101	1.19912	1.50741	-0.577767	0.559737	0.985762	0.000313096	0.00188283	0.00553154	0.645966	0.390016
Rtn3	1.3582e+06	100	0.01	2.958	2.9	0.321	1.026	6.64386	-6.64386	1.56462	1.53605	-1.63935	0.0370307	2.80253e-16	3.30088e-16	1.07953e-06	0.000563786	1.78393e-05	0.989044
Chat	507540	0.878	0.812	0.922	1.091	1.499	2.123	-0.187707	-0.300448	-0.117161	0.125651	0.584	1.0861	0.879156	0.584329	0.892055	0.999707	0.35857	0.00292479
Rnf126	161103	1.076	0.636	0.507	0.613	2.333	1.683	0.105678	-0.652901	-0.979942	-0.706041	1.22219	0.751035	0.961356	0.208424	0.0718394	0.328259	0.0161862	0.304214
Chmp2a	828687	1.407	1.302	1.868	1.592	1.497	2.382	0.492622	0.380729	0.901494	0.67084	0.582074	1.25217	0.411076	0.757774	0.0671128	0.619989	0.360328	0.000531441
Ndufv3	2.51751e+06	0.64	1.725	1.106	0.379	2.556	0.688	-0.643856	0.786596	0.145351	-1.39973	1.35389	-0.53952	0.0130763	0.00528796	0.928757	2.55168e-06	2.06234e-06	0.149649
Stxbp6	388493	0.617	1.222	0.735	0.686	2.969	2.144	-0.696658	0.289244	-0.444184	-0.54372	1.56998	1.1003	0.107891	0.881979	0.569158	0.227038	3.14277e-05	0.00350459
Birc6	325518	1.382	0.898	1.039	0.956	0.878	0.759	0.466758	-0.155213	0.0551957	-0.0649175	-0.187707	-0.397828	0.583304	0.898166	0.99772	0.935277	0.973626	0.532756
Rwdd1	1.23848e+06	1.382	0.948	1.212	1	0.789	0.787	0.466758	-0.077041	0.27739	0	-0.341903	-0.345564	0.299375	0.943315	0.790457	0.974593	0.703879	0.442989
Commd9	1.26818e+06	0.697	1.978	1.275	0.93	1.123	1.197	-0.520769	0.984042	0.350497	-0.104697	0.167358	0.259423	0.213475	0.00259587	0.682151	0.866538	0.858811	0.873539
Pigt	1.0221e+06	1.406	0.846	1.162	1.438	0.958	1.064	0.491597	-0.24127	0.21661	0.524064	-0.0619024	0.0894982	0.395814	0.785461	0.915769	0.776956	0.982469	0.986715
Nelfb	290777	1.517	0.896	0.994	1.141	0.934	1.121	0.601221	-0.158429	-0.00868224	0.190299	-0.0985055	0.164786	0.330087	0.901835	0.973644	0.991683	0.996955	0.944448
Cfap36	921803	0.815	1.217	1.017	1.371	100	100	-0.295128	0.283329	0.0243197	0.455229	6.64386	6.64386	0.729323	0.78592	0.989372	0.827225	2.21282e-16	2.24357e-16
Dkc1	1.01771e+07	1.024	1.028	1.09	0.879	3.701	3.182	0.0342157	0.0398403	0.124328	-0.186065	1.88792	1.66993	0.961212	0.994722	0.919639	0.738935	2.21282e-16	6.86813e-14
Miga2	281141	0.84	2.316	1.963	1.308	0.821	0.931	-0.251539	1.21164	0.97306	0.387363	-0.284546	-0.103147	0.798441	0.0120397	0.206939	0.922509	0.952109	0.931364
Kndc1	298011	1.894	0.701	1.364	0.88	1.191	1.033	0.921436	-0.512514	0.447844	-0.184425	0.252173	0.0468403	0.0477075	0.483168	0.806719	0.866538	0.789054	0.999548
Tomm22	1.7775e+07	1.39	1.858	2.584	1.311	0.746	1.003	0.475085	0.893751	1.36961	0.390668	-0.422752	0.00432161	0.000264751	2.86276e-09	2.92648e-16	0.163749	0.106735	0.986715
Fxr1	68057.1	0.828	1.26	1.114	100	0.01	0.782	-0.272297	0.333424	0.155749	6.64386	-6.64386	-0.354759	0.869091	0.901835	0.973644	2.67297e-16	2.21282e-16	0.681345
Tjp1	1.33569e+06	0.992	0.806	0.774	1.445	100	100	-0.011588	-0.311148	-0.369595	0.531069	6.64386	6.64386	0.98609	0.598256	0.495609	0.686245	2.21282e-16	2.24357e-16
Guk1	5.94373e+06	1.07	1.567	1.676	0.903	100	100	0.0976108	0.648005	0.745022	-0.147202	6.64386	6.64386	0.887352	0.0136346	0.00387121	0.866538	2.21282e-16	2.24357e-16
Atp5pf	5.50211e+07	1.12	1.625	1.773	100	0.01		0.163499	0.70044	0.826193	6.64386	-6.64386	#VALUE!	0.261595	2.34587e-12	8.3113e-10	2.67297e-16	2.21282e-16
Chp1	2.45454e+06	1.013	2.075	2.046	100		100	0.0186342	1.05311	1.03281	6.64386	#VALUE!	6.64386	0.991684	0.000295193	0.000370812	2.67297e-16		2.24357e-16
Themis2	1.55154e+07	2.174	0.836	1.901	0.996	100	100	1.12035	-0.258425	0.926759	-0.00578235	6.64386	6.64386	2.80253e-16	0.273551	1.06765e-07	0.93052	2.21282e-16	2.24357e-16
Fxyd1	1.28106e+08	1.005	10.068	10.043	0.128	0.72	0.093	0.0071955	3.33171	3.32812	-2.96578	-0.473931	-3.42663	0.999067	3.30088e-16	2.92648e-16	2.67297e-16	1.95725e-05	2.24357e-16
Sec23b	224527	100	0.01	0.918	1.318	0.958	1.016	6.64386	-6.64386	-0.123434	0.39835	-0.0619024	0.0229004	2.80253e-16	3.30088e-16	0.933901	0.922509	0.985887	0.986715
Atp5mc1	2.49746e+06	1.57	2.506	4.031	11.202	0.066	0.73	0.650765	1.32539	2.01114	3.48568	-3.92139	-0.454032	0.0423653	1.40524e-05	7.94042e-13	2.67297e-16	2.21282e-16	0.156991
Kng1	471860	0.836	1.105	0.591	0.213	0.941	0.184	-0.258425	0.144046	-0.75877	-2.23107	-0.0877334	-2.44222	0.796018	0.968127	0.197465	1.66563e-05	0.987609	1.46205e-11
Sema4a	3.80673e+06	1.059	0.893	0.953	0.094	0.998	0.101	0.0827026	-0.163268	-0.0694519	-3.4112	-0.00288828	-3.30757	0.916798	0.810504	0.955295	2.67297e-16	0.988875	2.24357e-16
COX1	9.34913e+07	1.355	0.938	1.261	1.676	0.28	0.955	0.438293	-0.0923402	0.334568	0.745022	-1.8365	-0.0664274	2.02767e-07	0.750682	0.0195639	1.71526e-08	2.21282e-16	0.890011
Chmp6	1.09242e+07	1.299	0.333	0.548	2.53	0.096	0.249	0.377401	-1.58641	-0.867752	1.33914	-3.38082	-2.00578	0.0676185	3.30088e-16	4.29735e-07	0.00025804	2.21282e-16	2.24357e-16
Eif3g	885127	0.572	1.508	0.826	0.811	1.196	0.944	-0.805913	0.592636	-0.275786	-0.302226	0.258217	-0.0831412	0.031442	0.231215	0.744045	0.600621	0.673974	0.919006
Sec31b	1.10854e+06	0.296	1.239	0.383	1.459	0.696	1.065	-1.75633	0.309176	-1.38458	0.54498	-0.522841	0.0908534	2.80253e-16	0.6335	5.44424e-09	0.440585	0.346347	0.966202
Mtrex	164123	0.576	1.464	0.839	1.14	1.448	1.45	-0.795859	0.549916	-0.253257	0.189034	0.534062	0.536053	0.0744555	0.551244	0.85277	0.988454	0.471414	0.532756
Fnbp1	2.12795e+06	1.424	0.727	0.985	3.451	0.308	1.233	0.509949	-0.459973	-0.0218044	1.78701	-1.699	0.302173	0.10688	0.18775	0.961997	6.11261e-09	6.29396e-06	0.71606
Ncoa5	2.3081e+06	1.034	1.064	0.988	2.521	0.313	1.176	0.0482362	0.0894982	-0.0174171	1.334	-1.67577	0.233888	0.975868	0.963813	0.968695	7.71368e-05	3.91803e-07	0.823637
Speg	563072	0.597	1.087	0.647	0.955	1.034	0.999	-0.744197	0.120352	-0.628162	-0.0664274	0.0482362	-0.00144342	0.0565052	0.95834	0.18953	0.903393	0.952109	0.980441
Lpcat1	565604	0.604	0.974	0.637	0.795	1.338	1.225	-0.72738	-0.0380063	-0.650635	-0.330973	0.420078	0.292782	0.086938	0.969211	0.157917	0.675391	0.530729	0.854132
Rpl37	200127	0.969	0.431	0.443	1.04	1.4	1.5	-0.0454314	-1.21424	-1.17462	0.0565835	0.485427	0.584963	0.982306	0.00377237	0.0195639	0.986587	0.550493	0.426654
Pacs1	9.48349e+06	0.902	0.958	0.833	100	0.01	1.063	-0.148801	-0.0619024	-0.263612	6.64386	-6.64386	0.0881416	0.66426	0.907444	0.408678	2.67297e-16	2.21282e-16	0.934369
Ache	4.88046e+06	0.617	1.227	0.937	1.363	1.341	1.075	-0.696658	0.295135	-0.093879	0.446786	0.423309	0.104337	0.000286065	0.453777	0.922975	0.520176	0.189346	0.960739
Plekhg6	1.32127e+06	0.482	1.026	0.456	0.842	1.309	1.146	-1.05289	0.0370307	-1.13289	-0.248108	0.388465	0.196607	4.31129e-05	0.998109	0.000130138	0.727531	0.459624	0.92228
Slc20a2	142422	0.637	1.287	0.793	1.003	1.293	1.287	-0.650635	0.364012	-0.334607	0.00432161	0.370722	0.364012	0.264782	0.854036	0.818837	0.961995	0.69958	0.854132
TIAM2	1.20237e+07	0.401	1.035	0.41	0.901	0.463	0.283	-1.31833	0.0496308	-1.2863	-0.150401	-1.11092	-1.82113	2.80253e-16	0.952657	2.92648e-16	0.33625	2.21282e-16	2.24357e-16
Acbd6	7.46917e+07	11.015	0.092	1.131	0.874	0.983	1.009	3.4614	-3.44222	0.177599	-0.194295	-0.0247367	0.0129262	2.80253e-16	3.30088e-16	0.457538	0.15532	0.992584	0.999853
Trip12	2.56868e+06	1.101	0.908	1.023	100	0.01	1.417	0.138814	-0.139236	0.0328061	6.64386	-6.64386	0.50284	0.88467	0.898166	0.999991	2.67297e-16	2.21282e-16	0.432805
Ndufa2	35267.6	0.657	0.766	0.565	1.695	1.015	1.668	-0.606035	-0.384584	-0.823677	0.761285	0.0214797	0.738119	0.465344	0.649963	0.339888	0.697688	0.964994	0.353034
Slc4a7	1.07663e+06	1.742	0.251	0.77	1.075	0.973	1.051	0.800745	-1.99424	-0.37707	0.104337	-0.0394883	0.0717627	0.0477075	1.55905e-10	0.518706	0.987083	0.999918	0.982429
Golga7	875712	0.661	1.237	0.845	1.079	1.028	0.727	-0.597278	0.306846	-0.242977	0.109695	0.0398403	-0.459973	0.179536	0.742189	0.768144	0.994608	0.952789	0.334741
Naga	204539	1.151	1.02	1.148	3.307	0.319	1.11	0.202888	0.0285692	0.199123	1.72552	-1.64837	0.15056	0.894717	0.986372	0.961997	0.00987628	0.00318311	0.967188
Cdip1	816238	0.671	1.539	0.987	1.144	0.969	1.172	-0.575615	0.621993	-0.018878	0.194087	-0.0454314	0.228973	0.124882	0.10871	0.970101	0.935215	0.995117	0.897996
Srrm1	808336	0.681	1.536	1.292	0.98	1.072	1.062	-0.554273	0.619178	0.369606	-0.0291463	0.100305	0.0867838	0.247857	0.160535	0.737729	0.93052	0.915555	0.986715
Trappc11	1.70947e+06	0.682	1.443	1.125	1.345	0.926	1.195	-0.552156	0.529071	0.169925	0.427606	-0.110916	0.257011	0.232566	0.290774	0.934042	0.73086	0.979079	0.853156
FAM120A	2.98824e+06	0.686	1.182	0.827	0.937	0.913	0.855	-0.54372	0.24123	-0.274041	-0.093879	-0.131313	-0.226004	0.0423653	0.743608	0.634268	0.91007	0.933686	0.636354
Cacna1b	1.13225e+06	0.687	1.096	0.855	1.169	0.819	0.936	-0.541618	0.132248	-0.226004	0.225275	-0.288065	-0.0954196	0.0744555	0.932059	0.708261	0.919106	0.798386	0.906158
Elmo2	4.90601e+06	2.475	0.33	0.813	0.852	1.036	0.883	1.30743	-1.59946	-0.298673	-0.231075	0.051024	-0.179515	3.05215e-09	9.38349e-12	0.517761	0.480091	0.915749	0.612212
Vcpip1	1.34253e+06	0.705	0.742	0.509	0.758	1.032	0.829	-0.504305	-0.430509	-0.974262	-0.39973	0.045443	-0.270556	0.237482	0.388255	0.00222086	0.500756	0.958874	0.595075
Tenm2	1.89482e+06	1.074	0.389	0.51	1.1	0.653	0.885	0.102994	-1.36216	-0.971431	0.137504	-0.614845	-0.176251	0.939912	2.13249e-06	0.00243502	0.974391	0.188596	0.79814
Dnaja2	1.23382e+06	0.699	1.287	0.924	1.544	0.729	1.158	-0.516636	0.364012	-0.114035	0.626673	-0.456009	0.211635	0.174039	0.534015	0.919639	0.479854	0.571155	0.893649
Hdac2	7.2163e+06	0.701	1.143	0.796	0.793	1.125	0.834	-0.512514	0.192825	-0.32916	-0.334607	0.169925	-0.261881	0.0203812	0.723634	0.320381	0.228642	0.690565	0.260599
Tbc1d15	632463	1.233	6.16	7.305	100	0.01	0.799	0.302173	2.62293	2.86888	6.64386	-6.64386	-0.323733	0.7516	6.28962e-12	1.50787e-13	2.67297e-16	2.21282e-16	0.628521
Krt90	1.46309e+07	0.615	0.916	0.527	2.161	0.253	0.402	-0.701342	-0.12658	-0.924125	1.1117	-1.98279	-1.31473	1.99687e-10	0.62097	1.33951e-10	2.67297e-16	2.21282e-16	2.24357e-16
Macrod2	1.18726e+07	1.173	1.26	1.418	1.284	0.35	0.875	0.230203	0.333424	0.503858	0.360645	-1.51457	-0.192645	0.352969	0.304338	0.0636376	0.506279	2.41134e-14	0.547521
Eif3m	1.61628e+06	0.719	1.49	1.046	1.058	1.578	1.546	-0.475936	0.575312	0.0648829	0.0813396	0.658097	0.62854	0.222526	0.139077	0.992578	0.993885	0.159646	0.238566
Them6	2.33816e+06	0.726	1.11	0.739	1.24	1.183	1.404	-0.461959	0.15056	-0.436354	0.31034	0.24245	0.489543	0.183969	0.925063	0.244054	0.838059	0.659505	0.222784
Agpat1	2.29049e+06	0.728	1.143	0.835	0.952	1.242	1.186	-0.45799	0.192825	-0.260152	-0.0709665	0.312665	0.246104	0.188649	0.888141	0.634268	0.924159	0.572371	0.802957
Mtx3	2.17559e+06	1.496	0.444	0.974	0.636	1.6	0.97	0.58111	-1.17137	-0.0380063	-0.652901	0.678072	-0.0439433	0.134014	4.21055e-05	0.958069	0.291457	0.126736	0.95009
Spcs2	1.58268e+06	0.731	1.14	0.815	0.921	1.146	1.109	-0.452057	0.189034	-0.295128	-0.118727	0.196607	0.149259	0.329378	0.898166	0.66708	0.866538	0.789415	0.941655
Gclc	7.09689e+06	0.995	1.042	1.026	1.006	0.449	0.462	-0.00723157	0.0593553	0.0370307	0.00863031	-1.15521	-1.11404	0.994303	0.95834	0.987118	0.974593	3.14227e-05	1.0759e-09
Zyg11b	1.40701e+06	0.737	1.001	0.733	0.715	1.263	0.967	-0.440263	0.00144197	-0.448115	-0.483985	0.336855	-0.0484122	0.368488	0.998109	0.316679	0.277974	0.571155	0.95009
Kmt2a	6.75006e+06	0.737	1.061	0.766	0.907	1.058	0.978	-0.440263	0.0854247	-0.384584	-0.140826	0.0813396	-0.0320936	0.0217959	0.925063	0.171864	0.787118	0.923707	0.95009
KRT1	2.77756e+08	0.67	0.902	0.594	1.554	0.361	0.486	-0.577767	-0.148801	-0.751465	0.635987	-1.46993	-1.04097	2.80253e-16	0.225709	6.33046e-14	6.36226e-11	2.21282e-16	2.24357e-16
Sec61a2	238143	0.738	1.494	1.172	1.701	1.063	1.535	-0.438307	0.57918	0.228973	0.766383	0.0881416	0.618239	0.504801	0.570822	0.955295	0.676854	0.944926	0.51296
Ndufb4	5.75975e+06	1.244	0.87	1.333	5.984	1.022	0.5	0.314986	-0.200913	0.414677	2.58111	0.0313952	-1	0.390327	0.610927	0.19282	2.67297e-16	0.96527	2.88967e-08
Bcr	3.26949e+06	0.744	1.186	0.864	1.027	0.946	1.112	-0.426625	0.246104	-0.210897	0.0384362	-0.0800879	0.153157	0.204222	0.796858	0.726343	0.993162	0.973626	0.91033
Slc25a20	4.23753e+06	0.754	1.04	0.87	0.935	0.988	0.808	-0.407364	0.0565835	-0.200913	-0.0969617	-0.0174171	-0.307573	0.145911	0.974276	0.793116	0.843253	0.996944	0.256208
Cd47	1.38552e+07	0.748	1.505	1.092	0.954	0.522	0.504	-0.41889	0.589763	0.126973	-0.0679388	-0.937878	-0.988504	0.00167058	0.000282318	0.881848	0.830276	3.38169e-08	1.97157e-14
Ppp1r12c	358764	0.81	1.307	1.044	0.789	0.668	0.508	-0.304006	0.386259	0.0621217	-0.341903	-0.58208	-0.9771	0.739596	0.784025	0.997469	0.761291	0.708132	0.0133766
Bub3	8.65927e+06	0.764	1.314	1.075	1.002	0.808	0.81	-0.388355	0.393965	0.104337	0.00288251	-0.307573	-0.304006	0.057783	0.10641	0.938644	0.9663	0.530159	0.218685
Ccdc88b	9.5647e+06	0.764	1.214	0.924	1.026	1.004	1.052	-0.388355	0.279768	-0.114035	0.0370307	0.00575927	0.0731347	0.0172448	0.271898	0.851013	0.9931	0.974647	0.968101
Dnaja4	3.9996e+06	0.764	1.143	0.892	1.498	0.836	1.1	-0.388355	0.192825	-0.164884	0.583038	-0.258425	0.137504	0.18418	0.747662	0.850525	0.237804	0.714152	0.931364
Crocc	3.36639e+06	0.765	1.12	0.835	1	1.212	1.086	-0.386468	0.163499	-0.260152	0	0.27739	0.119024	0.258909	0.901835	0.635611	0.975399	0.605752	0.953045
Bbs1	231550	1.97	0.531	0.932	1.344	0.593	0.8	0.978196	-0.913216	-0.101598	0.426533	-0.753896	-0.321928	0.0343039	0.0811618	0.94288	0.900492	0.489269	0.715744
Abraxas2	584303	0.768	1.13	0.902	0.989	1.013	1.07	-0.380822	0.176323	-0.148801	-0.0159576	0.0186342	0.0976108	0.598531	0.923039	0.894068	0.945585	0.960968	0.986715
Adcy8	181432	0.768	1.926	1.691	1.874	0.69	1.267	-0.380822	0.945608	0.757877	0.906121	-0.535332	0.341417	0.689925	0.143803	0.509278	0.52398	0.774642	0.876834
Dctn6	6.45659e+06	1.227	0.817	1.037	0.971	0.485	0.526	0.295135	-0.291592	0.0524159	-0.0424568	-1.04394	-0.926865	0.379083	0.409524	0.981662	0.919106	8.21075e-07	1.08928e-06
Syt3	603191	0.77	0.966	0.958	1.218	0.835	0.954	-0.37707	-0.0499049	-0.0619024	0.284514	-0.260152	-0.0679388	0.373428	0.943315	0.937101	0.688594	0.664643	0.904037
H2bu2	1.97037e+06	0.723	0.883	0.613	1.015	1.022	1.036	-0.467932	-0.179515	-0.706041	0.0214797	0.0313952	0.051024	0.216799	0.844817	0.0108177	0.987083	0.967671	0.986715
Ckmt2	1.14594e+06	0.777	0.921	0.619	0.805	0.993	0.828	-0.364013	-0.118727	-0.691989	-0.312939	-0.0101344	-0.272297	0.547843	0.923271	0.0531726	0.608052	0.973626	0.637256
Ncstn	381797	0.775	1.226	1.122	1.105	0.714	0.79	-0.367732	0.293959	0.166073	0.144046	-0.486004	-0.340075	0.633786	0.89745	0.970101	0.996025	0.782341	0.611833
Trappc10	756904	0.576	1.104	0.625	0.941	0.836	0.758	-0.795859	0.14274	-0.678072	-0.0877334	-0.258425	-0.39973	0.0161982	0.923271	0.0806607	0.889385	0.874044	0.369589
Cnot1	2.05273e+06	0.777	0.916	0.768	1.032	0.942	0.979	-0.364013	-0.12658	-0.380822	0.045443	-0.086201	-0.0306192	0.416468	0.901835	0.359523	0.994798	0.973626	0.957483
Apba2	2.44104e+06	0.778	1.142	0.921	0.926	1.211	1.039	-0.362158	0.191563	-0.118727	-0.110916	0.276199	0.0551957	0.526914	0.896839	0.878333	0.871229	0.707023	0.996286
Hapln2	1.25733e+07	0.779	1.255	1.191	1.201	0.844	1.033	-0.360305	0.327687	0.252173	0.264236	-0.244685	0.0468403	0.0139026	0.127318	0.581188	0.63804	0.66826	0.983612
Cpeb2	3.41399e+06	0.883	1.416	1.254	0.642	0.869	0.535	-0.179515	0.501821	0.326537	-0.639355	-0.202572	-0.902389	0.799037	0.174154	0.634268	0.0877121	0.899424	0.000181264
KRT6A	3.19962e+07	0.806	1.045	0.897	1.117	0.498	0.555	-0.311148	0.0635029	-0.15682	0.159629	-1.00578	-0.84944	0.0121709	0.901835	0.634268	0.787118	2.21282e-16	2.24357e-16
	5.52586e+06	1.062	0.852	0.996	0.88	0.651	0.557	0.0867838	-0.231075	-0.00578235	-0.184425	-0.619271	-0.844251	0.890258	0.425768	0.978248	0.741472	0.0161875	3.67315e-07
Araf	1.02121e+07	0.593	1.244	0.642	1.101	0.916	0.935	-0.753896	0.314986	-0.639355	0.138814	-0.12658	-0.0969617	1.43691e-09	0.131195	0.000607166	0.92053	0.932308	0.853156
Usp4	2.33757e+06	0.785	1.076	0.905	1.075	1.032	1.186	-0.349235	0.105678	-0.14401	0.104337	0.045443	0.246104	0.45743	0.956475	0.858434	0.987083	0.952109	0.797375
Sf3b2	709059	0.786	0.988	0.862	1.038	0.939	0.984	-0.347399	-0.0174171	-0.21424	0.0538064	-0.0908029	-0.0232698	0.63351	0.981003	0.758947	0.994798	0.973626	0.968101
Miga1	447896	0.79	1.434	1.1	1.864	0.796	1.349	-0.340075	0.520045	0.137504	0.898402	-0.32916	0.43189	0.688161	0.551992	0.974658	0.410269	0.941035	0.593744
Mllt11	3.15203e+06	0.791	1.276	0.99	0.79	1.282	0.928	-0.33825	0.351628	-0.0144996	-0.340075	0.358396	-0.107803	0.422122	0.509839	0.973644	0.592346	0.409942	0.901509
Mrps35	1.50657e+06	0.791	1.18	0.891	1.093	1.156	1.294	-0.33825	0.238787	-0.166503	0.128293	0.209141	0.371838	0.564333	0.822834	0.843871	0.998267	0.808939	0.703242
Kazn	770041	0.791	1.132	1.042	1.26	0.788	0.751	-0.33825	0.178874	0.0593553	0.333424	-0.343732	-0.413115	0.670887	0.901835	0.99674	0.932017	0.927486	0.523352
Tkfc	389139	0.791	1.345	1.313	2.083	0.542	1.006	-0.33825	0.427606	0.392867	1.05866	-0.883635	0.00863031	0.674792	0.723634	0.851013	0.190278	0.314555	0.986715
Serpinh1	237929	0.792	1.252	0.952	0.958	1.06	1.031	-0.336428	0.324235	-0.0709665	-0.0619024	0.0840643	0.0440443	0.683382	0.881298	0.955295	0.935215	0.929869	0.999548
Rabgef1	181782	0.793	1.71	1.232	1.252	0.819	1.032	-0.334607	0.773996	0.301002	0.324235	-0.288065	0.045443	0.752715	0.333313	0.922975	0.952887	0.947773	0.989425
Tial1	3.12642e+06	0.794	1.169	0.921	0.863	0.999	0.949	-0.332789	0.225275	-0.118727	-0.212568	-0.00144342	-0.07552	0.439062	0.822834	0.881848	0.79213	0.973626	0.931364
Gltp	1.78129e+06	0.794	1.468	1.171	1.377	1.023	1.248	-0.332789	0.553852	0.227741	0.461529	0.0328061	0.319618	0.556075	0.149659	0.883269	0.79213	0.94946	0.815178
Gmpr2	234098	1.222	1.89	2.065	4.153	0.181	0.738	0.289244	0.918386	1.04614	2.05415	-2.46594	-0.438307	0.818419	0.1307	0.16514	0.00038829	1.16983e-07	0.417056
Ablim1	1.45222e+06	0.795	1.017	1.038	1.125	0.958	1.109	-0.330973	0.0243197	0.0538064	0.169925	-0.0619024	0.149259	0.587692	0.998945	0.997892	0.9931	0.981219	0.957028
Cluh	985826	0.795	1.306	1.11	1.985	0.573	1.19	-0.330973	0.385155	0.15056	0.989139	-0.803393	0.250962	0.677161	0.584329	0.955295	0.110622	0.299201	0.879965
Stub1	671364	0.796	1.02	0.819	1.004	0.996	0.994	-0.32916	0.0285692	-0.288065	0.00575927	-0.00578235	-0.00868224	0.677161	0.999791	0.718119	0.960477	0.966884	0.983544
Katnal1	2.16251e+06	0.797	1.245	1.037	0.974	1.097	1.022	-0.327348	0.316146	0.0524159	-0.0380063	0.133564	0.0313952	0.502256	0.682578	0.99772	0.951771	0.875685	0.988918
Polr2h	3.00863e+06	0.797	1.374	1.044	1.037	0.94	0.985	-0.327348	0.458382	0.0621217	0.0524159	-0.0892673	-0.0218044	0.409872	0.250102	0.992578	0.995218	0.973626	0.973066
Fam169a	1.65348e+07	1.23	0.734	0.928	0.817	0.799	0.563	0.298658	-0.446148	-0.107803	-0.291592	-0.323733	-0.828793	0.0933964	0.0090026	0.858484	0.506369	0.423574	2.91778e-08
Sstr2	1.40916e+06	0.802	1.259	0.905	0.82	1.203	0.851	-0.318326	0.332278	-0.14401	-0.286304	0.266637	-0.232769	0.639448	0.668746	0.890607	0.648225	0.673974	0.711423
Fam114a2	1.54414e+06	0.803	1.11	0.894	0.726	1.288	0.91	-0.316528	0.15056	-0.161653	-0.461959	0.365133	-0.136062	0.623268	0.921831	0.841893	0.338168	0.380793	0.859321
Osgep	155150	0.803	1.958	1.583	1.623	0.854	1.518	-0.316528	0.969381	0.662661	0.698663	-0.227692	0.602172	0.780685	0.132126	0.634268	0.727531	0.961301	0.518585
Ptpn5	1.03576e+06	0.769	1.931	1.373	2.126	0.249		-0.378944	0.949348	0.457332	1.08814	-2.00578	#VALUE!	0.564834	0.0539146	0.634268	0.222522	1.07206e-05
KRT16	8.78728e+07	0.942	1.134	1.089	0.895	0.686	0.572	-0.086201	0.181421	0.123004	-0.16004	-0.54372	-0.805913	0.688822	0.168215	0.671876	0.273121	8.98815e-08	2.24357e-16
KRT10	1.09733e+08	0.762	0.738	0.561	1.469	0.432	0.573	-0.392137	-0.438307	-0.833927	0.554834	-1.2109	-0.803393	1.8231e-07	9.45658e-08	2.92648e-16	3.15805e-08	2.21282e-16	2.24357e-16
Dennd4b	396538	0.807	1.558	1.549	1.287	0.85	1.269	-0.309359	0.639695	0.631337	0.364012	-0.234465	0.343692	0.718052	0.326765	0.445208	0.919106	0.973626	0.811894
Gnb4	3.60154e+06	0.808	1.04	0.798	0.891	1.018	0.871	-0.307573	0.0565835	-0.325539	-0.166503	0.0257376	-0.199255	0.484362	0.982356	0.487603	0.827225	0.96388	0.800313
Ggct	1.22881e+07	0.81	0.97	0.783	0.873	1.174	0.999	-0.304006	-0.0439433	-0.352916	-0.195946	0.231432	-0.00144342	0.105287	0.943361	0.155131	0.403588	0.463489	0.986715
Pik3r4	2.09014e+06	0.81	1.251	1.114	1.128	0.951	1.05	-0.304006	0.323082	0.155749	0.173767	-0.0724828	0.0703893	0.591551	0.611299	0.940855	0.960526	0.995117	0.986715
Mrtfb	1.42386e+06	0.811	1.139	0.9	0.715	1.251	0.921	-0.302226	0.187768	-0.152003	-0.483985	0.323082	-0.118727	0.667439	0.898166	0.87948	0.315942	0.622661	0.901509
Efr3a	3.29241e+06	0.811	1.523	1.228	1.201	0.898	1.005	-0.302226	0.606916	0.296311	0.264236	-0.155213	0.0071955	0.543147	0.108888	0.715985	0.801769	0.886966	0.986715
Tuba1c	5.97162e+08	0.812	1.078	0.986	1.007	0.939	0.894	-0.300448	0.108357	-0.0203404	0.0100637	-0.0908029	-0.161653	3.37104e-06	0.386909	0.980206	0.96398	0.85358	0.243909
2900026A02Rik	3.82229e+06	0.812	1.14	0.843	1.121	0.859	0.952	-0.300448	0.189034	-0.246395	0.164786	-0.21927	-0.0709665	0.482099	0.85159	0.671876	0.87385	0.722798	0.896654
Ltn1	316385	0.813	1.003	0.925	1.356	0.558	0.906	-0.298673	0.00432161	-0.112475	0.439357	-0.841663	-0.142417	0.734133	0.984912	0.933901	0.900496	0.314161	0.890778
Pon2	1.04949e+06	0.813	1.23	1.011	1.469	0.654	0.831	-0.298673	0.298658	0.015783	0.554834	-0.612637	-0.26708	0.665122	0.717755	0.993117	0.570794	0.329454	0.628521
Adcy1	231579	0.814	1.115	0.901	0.776	1.199	0.944	-0.296899	0.157044	-0.150401	-0.365871	0.261832	-0.0831412	0.768287	0.966572	0.919099	0.746249	0.796103	0.943203
Cenpv	7.47442e+06	0.731	0.884	0.649	0.921	0.994	0.895	-0.452057	-0.177882	-0.62371	-0.118727	-0.00868224	-0.16004	0.0658173	0.620653	0.00266355	0.712976	0.973626	0.599615
Rap1gap	4.40277e+06	0.814	1.101	0.897	0.928	1.122	1.043	-0.296899	0.138814	-0.15682	-0.107803	0.166073	0.0607392	0.443253	0.898166	0.853391	0.87385	0.792608	0.986715
Ube3a	4.99243e+06	0.815	1.091	0.879	0.942	1.076	0.999	-0.295128	0.125651	-0.186065	-0.086201	0.105678	-0.00144342	0.261451	0.848168	0.705971	0.819929	0.791149	0.985307
Retreg2	1.91362e+06	0.815	1.18	0.904	1.161	0.9	1.032	-0.295128	0.238787	-0.145605	0.215368	-0.152003	0.045443	0.612293	0.804485	0.851013	0.932017	0.960968	0.999378
Rpl29	6.50454e+06	0.816	1.084	0.892	0.974	0.925	0.88	-0.293359	0.116365	-0.164884	-0.0380063	-0.112475	-0.184425	0.313697	0.896839	0.786019	0.924159	0.944926	0.605775
Usp46	1.60115e+07	0.816	1.161	0.979	1.081	1.119	1.257	-0.293359	0.215368	-0.0306192	0.112367	0.16221	0.329985	0.0732676	0.380942	0.968695	0.960526	0.673974	0.101838
Ank2	3.03567e+06	0.78	0.852	0.655	1.147	0.992	1.05	-0.358454	-0.231075	-0.610433	0.197865	-0.011588	0.0703893	0.327023	0.595828	0.0274959	0.866131	0.975521	0.968101
Bsdc1	1.61692e+06	0.817	1.169	0.951	0.815	1.169	0.972	-0.291592	0.225275	-0.0724828	-0.295128	0.225275	-0.0409718	0.662432	0.867692	0.95288	0.613187	0.746825	0.954932
Vim	5.11021e+06	0.818	1.102	0.954	1.239	1.02	1.235	-0.289827	0.140124	-0.0679388	0.309176	0.0285692	0.304511	0.430177	0.899717	0.955295	0.582108	0.962161	0.352829
Slc24a2	797673	1.006	1.803	2.181	4.124	0.379	1.523	0.00863031	0.850399	1.12499	2.04404	-1.39973	0.606916	0.998876	0.10143	0.0131029	6.17702e-07	0.00735979	0.219769
Cnnm2	272646	0.82	1.192	0.961	1.103	0.654	0.84	-0.286304	0.253384	-0.0573917	0.141433	-0.612637	-0.251539	0.796018	0.923039	0.959937	0.994798	0.706347	0.803106
Rpl22l1	2.51874e+06	1.386	1.27	1.772	2.234	0.381	0.941	0.470927	0.344828	0.825379	1.15963	-1.39214	-0.0877334	0.229156	0.624933	0.0117714	0.00335134	3.21719e-05	0.910106
Hexb	1.93818e+07	0.823	1.089	0.868	0.984	0.944	0.951	-0.281036	0.123004	-0.204233	-0.0232698	-0.0831412	-0.0724828	0.0691866	0.754808	0.534762	0.874319	0.969892	0.890778
Psme1	6.253e+06	0.824	1.233	1.071	0.923	0.981	0.88	-0.279284	0.302173	0.0989585	-0.115597	-0.027675	-0.184425	0.377255	0.358437	0.944617	0.8927	0.989757	0.791109
Itgav	3.07159e+06	0.824	1.426	1.167	1.098	0.901	1.001	-0.279284	0.511974	0.222805	0.134878	-0.150401	0.00144197	0.540918	0.142937	0.840235	0.974391	0.930549	0.984371
Ranbp3	5.41374e+06	0.825	0.993	0.781	0.937	1.096	1.03	-0.277534	-0.0101344	-0.356606	-0.093879	0.132248	0.0426443	0.506427	0.97273	0.248282	0.866538	0.835156	0.989039
Fxr2	3.90224e+06	0.826	1.275	1.04	0.809	0.965	0.846	-0.275786	0.350497	0.0565835	-0.305788	-0.0513992	-0.24127	0.555171	0.397942	0.973644	0.498974	0.978596	0.482198
Pmpca	9.7675e+06	0.826	1.116	0.96	0.911	1.042	0.974	-0.275786	0.158337	-0.0588937	-0.134477	0.0593553	-0.0380063	0.177723	0.721302	0.933901	0.713414	0.898208	0.949219
Washc2	4.44397e+06	0.768	1.335	0.92	0.709	0.906	0.589	-0.380822	0.41684	-0.120294	-0.496142	-0.142417	-0.76366	0.2364	0.220437	0.907345	0.106492	0.895563	0.000121007
Rilpl1	314705	0.833	1.376	1.02	1.14	0.676	0.812	-0.263612	0.46048	0.0285692	0.189034	-0.564905	-0.300448	0.784579	0.721302	0.986885	0.994798	0.747729	0.727151
Cadps2	6.32334e+06	0.833	1.128	0.957	1.164	0.939	1.027	-0.263612	0.173767	-0.0634092	0.219091	-0.0908029	0.0384362	0.414061	0.778099	0.937912	0.827195	0.957438	0.996171
Nudt2	1.34007e+06	0.862	1.399	1.258	3.136	0.408	1.149	-0.21424	0.484396	0.331132	1.64893	-1.29336	0.200379	0.799037	0.350577	0.715985	0.00136402	0.0172416	0.931364
Txndc5	7.88302e+06	0.835	0.971	0.818	0.959	1.054	1.046	-0.260152	-0.0424568	-0.289827	-0.0603973	0.0758749	0.0648829	0.528919	0.93738	0.40003	0.878747	0.924845	0.976038
Slc39a12	485467	0.835	1.3	1.201	1.097	0.902	1.036	-0.260152	0.378512	0.264236	0.133564	-0.148801	0.051024	0.795429	0.790089	0.923842	0.999663	0.995117	0.999853
Atg9a	1.19963e+06	1	1.317	1.375	3.619	0.335	1.166	0	0.397255	0.459432	1.85559	-1.57777	0.221568	0.99982	0.563568	0.560146	1.13201e-05	0.000777426	0.901509
Dr1	593493	1.294	1.695	2.267	1.768	0.408	0.845	0.371838	0.761285	1.18078	0.822118	-1.29336	-0.242977	0.633786	0.201563	0.0190711	0.498689	0.0211609	0.784203
Smdt1	2.28143e+06	0.836	0.778	0.878	1.708	0.494	0.936	-0.258425	-0.362158	-0.187707	0.772308	-1.01742	-0.0954196	0.689995	0.459028	0.794373	0.193445	0.13465	0.919478
Cd34	8.9825e+06	0.837	1.022	0.844	0.708	0.974	0.806	-0.2567	0.0313952	-0.244685	-0.498179	-0.0380063	-0.311148	0.340106	0.989292	0.555338	0.193664	0.999918	0.300753
	1.17423e+07	0.837	1.064	0.88	0.846	1.089	0.926	-0.2567	0.0894982	-0.184425	-0.24127	0.123004	-0.110916	0.173443	0.913852	0.657216	0.263186	0.788959	0.78556
Bcam	561599	0.838	1.075	0.861	0.843	1.215	0.987	-0.254978	0.104337	-0.215915	-0.246395	0.280956	-0.018878	0.800023	0.974827	0.851013	0.772543	0.746512	0.977734
Hdgfl3	8.78154e+07	0.838	1.061	0.906	1.055	0.972	1.073	-0.254978	0.0854247	-0.142417	0.077243	-0.0409718	0.10165	0.00412865	0.74564	0.645145	0.957148	0.987609	0.843586
Dpp10	388821	0.333	2.151	0.835	1.421	0.413	0.62	-1.58641	1.10501	-0.260152	0.506907	-1.27579	-0.68966	2.22877e-07	0.0118387	0.811159	0.866538	0.061421	0.20535
Ppp6r3	560471	0.832	1.383	1.263	2.614	0.422	0.992	-0.265345	0.467801	0.336855	1.38626	-1.24469	-0.011588	0.788535	0.622625	0.847893	0.0229208	0.0306178	0.978208
Acin1	791191	0.84	0.972	0.839	1.032	1.16	1.147	-0.251539	-0.0409718	-0.253257	0.045443	0.214125	0.197865	0.795429	0.966572	0.768112	0.974593	0.798386	0.933557
Pde4b	9.63383e+06	1.058	0.65	0.791	0.836	1.159	0.912	0.0813396	-0.621488	-0.33825	-0.258425	0.212881	-0.132894	0.897521	0.000710836	0.288989	0.676854	0.635681	0.778512
Maea	183175	0.841	1.007	0.834	0.913	1.14	1.057	-0.249822	0.0100637	-0.261881	-0.131313	0.189034	0.0799754	0.847746	0.987121	0.863766	0.893348	0.884431	0.999853
Cacna1a	1.01099e+06	0.841	1.323	1.125	1.257	0.835	1.186	-0.249822	0.403813	0.169925	0.329985	-0.260152	0.246104	0.798441	0.510495	0.929657	0.855466	0.886966	0.881388
Rp1l1	1.47899e+06	0.842	1.513	1.062	1.139	0.797	0.947	-0.248108	0.597412	0.0867838	0.187768	-0.327348	-0.0785637	0.753791	0.185638	0.981674	0.987083	0.915555	0.943203
Nwd2	2.76231e+06	1.026	1.089	1.322	2.097	0.428	1.014	0.0370307	0.123004	0.402722	1.06833	-1.22432	0.0200577	0.980126	0.938785	0.506759	0.0589506	0.00425902	0.986715
Mars1	1.54167e+07	0.844	0.982	0.842	0.876	1.075	1.025	-0.244685	-0.0262051	-0.248108	-0.190997	0.104337	0.0356239	0.218507	0.966572	0.409345	0.580671	0.847281	0.986715
Abhd11	5.80657e+06	0.844	1.255	1.047	1.1	0.974	1.336	-0.244685	0.327687	0.0662614	0.137504	-0.0380063	0.41792	0.56135	0.329819	0.966763	0.960526	0.991444	0.161729
Acss1	869681	1.177	0.651	0.754	0.952	0.883	0.973	0.235114	-0.619271	-0.407364	-0.0709665	-0.179515	-0.0394883	0.847928	0.0917695	0.468743	0.897211	0.954165	0.956034
Hdgfl2	2.13592e+06	1.178	0.738	0.932	0.672	0.983	0.6	0.23634	-0.438307	-0.101598	-0.573467	-0.0247367	-0.736966	0.723945	0.295249	0.90185	0.188451	0.985431	0.00416599
Ube4a	355750	0.847	1.701	1.361	1.791	0.817	1.216	-0.239566	0.766383	0.444667	0.840765	-0.291592	0.282143	0.81897	0.240977	0.828881	0.510499	0.944926	0.854132
M6pr	2.04906e+07	0.848	1.028	0.939	0.883	1.129	1.021	-0.237864	0.0398403	-0.0908029	-0.179515	0.175045	0.0299829	0.183977	0.969211	0.85277	0.660254	0.625086	0.999548
Gfra2	593983	0.848	0.975	0.835	0.953	1.132	1.028	-0.237864	-0.0365259	-0.260152	-0.0694519	0.178874	0.0398403	0.81897	0.971923	0.774583	0.931239	0.86195	0.999548
Cdkl5	1.42569e+07	0.957	1.041	1.051	1.857	0.448	0.955	-0.0634092	0.0579701	0.0717627	0.892974	-1.15843	-0.0664274	0.924471	0.971526	0.961997	0.000128129	2.13221e-08	0.904037
Arfgap2	3.01176e+06	1.412	0.907	1.161	0.594	1.215	0.799	0.49774	-0.140826	0.215368	-0.751465	0.280956	-0.323733	0.218856	0.901835	0.846069	0.031851	0.670938	0.451856
Pter	162395	0.849	1.12	0.923	1.823	0.64	1.052	-0.236164	0.163499	-0.115597	0.866315	-0.643856	0.0731347	0.866627	0.974827	0.947066	0.54579	0.634852	0.999853
Kras	2.21823e+07	0.85	1.011	0.892	0.964	1.036	1.013	-0.234465	0.015783	-0.164884	-0.0528949	0.051024	0.0186342	0.166048	0.998187	0.666245	0.848472	0.929869	0.999853
Marcksl1	7.99102e+06	0.851	0.91	0.776	0.867	1.047	0.89	-0.232769	-0.136062	-0.365871	-0.205896	0.0662614	-0.168123	0.432896	0.743608	0.195141	0.424594	0.891568	0.606527
Zbed5	5.32289e+06	1.2	0.654	0.838	0.846	1.242	1.086	0.263034	-0.612637	-0.254978	-0.24127	0.312665	0.119024	0.518885	0.004065	0.582363	0.62227	0.359654	0.92228
Tbc1d10b	8.71996e+06	0.851	0.931	0.811	1.042	0.919	0.959	-0.232769	-0.103147	-0.302226	0.0593553	-0.121863	-0.0603973	0.479003	0.862217	0.361513	0.998267	0.933686	0.904778
Stt3b	2.18429e+06	0.851	1.273	1.058	1.067	0.836	0.88	-0.232769	0.348232	0.0813396	0.0935602	-0.258425	-0.184425	0.717381	0.592579	0.980206	0.992364	0.729518	0.669775
Syne1	1.77082e+06	1.365	0.893	1.121	0.595	1.006	0.788	0.448901	-0.163268	0.164786	-0.749038	0.00863031	-0.343732	0.383432	0.885972	0.931746	0.0340183	0.97302	0.501166
Mark2	5.68422e+06	0.605	1.002	0.719	1.142	0.906	1.025	-0.724993	0.00288251	-0.475936	0.191563	-0.142417	0.0356239	4.07908e-06	0.998109	0.0688871	0.843197	0.908826	0.986715
Slc33a1	258411	0.852	1.024	0.885	0.883	1.148	1.022	-0.231075	0.0342157	-0.176251	-0.179515	0.199123	0.0313952	0.840614	0.996444	0.920516	0.866538	0.880511	0.986715
Slc1a2	1.91852e+06	0.852	1.072	0.944	0.984	0.899	0.852	-0.231075	0.100305	-0.0831412	-0.0232698	-0.153607	-0.231075	0.738527	0.96315	0.923434	0.960526	0.947773	0.660688
Tnik	1.28718e+07	0.852	1.02	0.94	0.99	0.857	0.988	-0.231075	0.0285692	-0.0892673	-0.0144996	-0.222633	-0.0174171	0.284193	0.989292	0.890607	0.93052	0.739542	0.977734
Grm1	1.42021e+06	0.853	1.184	0.94	0.943	1.033	0.99	-0.229382	0.243669	-0.0892673	-0.0846703	0.0468403	-0.0144996	0.77021	0.816528	0.931746	0.910524	0.956685	0.972461
Palm2	6.90738e+06	0.853	1.263	1.02	0.992	0.964	1.016	-0.229382	0.336855	0.0285692	-0.011588	-0.0528949	0.0229004	0.540918	0.199673	0.992578	0.935277	0.98981	0.999853
Hmgn2	597995	0.854	1.079	1.072	0.986	1.397	1.257	-0.227692	0.109695	0.100305	-0.0203404	0.482332	0.329985	0.836209	0.975707	0.976973	0.960526	0.324323	0.780316
Prkcsh	1.3904e+07	0.855	1.172	1.001	0.824	1.135	1.055	-0.226004	0.228973	0.00144197	-0.279284	0.182692	0.077243	0.260335	0.453136	0.989795	0.199596	0.598015	0.959455
Map1s	1.24011e+07	0.855	0.981	0.854	0.929	1.001	0.914	-0.226004	-0.027675	-0.227692	-0.106249	0.00144197	-0.129734	0.47047	0.966572	0.615836	0.827225	0.973626	0.841869
Hnrnph3	1.78539e+06	0.855	1.059	0.753	1.161	0.883	1.118	-0.226004	0.0827026	-0.409278	0.215368	-0.179515	0.16092	0.747935	0.969211	0.281938	0.924159	0.933686	0.92228
Prr36	3.07262e+06	0.856	1.416	1.143	1.113	1.118	1.157	-0.224317	0.501821	0.192825	0.154454	0.16092	0.210389	0.708292	0.184766	0.87948	0.960526	0.830075	0.849417
ND2	2.57343e+06	1.088	1.251	1.549	2.827	0.452	1.099	0.121679	0.323082	0.631337	1.49927	-1.14561	0.136191	0.894717	0.665295	0.107236	3.08069e-06	0.000519811	0.931364
Bag5	2.35229e+06	0.856	1.129	0.957	1.144	1.171	1.261	-0.224317	0.175045	-0.0634092	0.194087	0.227741	0.334568	0.747466	0.901835	0.933901	0.960477	0.76941	0.770012
Mt2	616579	0.856	1.148	0.968	1.176	1.051	1.156	-0.224317	0.199123	-0.046921	0.233888	0.0717627	0.209141	0.841174	0.918715	0.961997	0.963083	0.932425	0.929375
Cep95	298311	0.856	1.204	1.089	1.265	0.714	0.891	-0.224317	0.267835	0.123004	0.339137	-0.486004	-0.166503	0.83087	0.901835	0.983175	0.930527	0.795472	0.876834
Khsrp	4.59172e+07	0.858	1.082	0.988	0.969	1.064	1.019	-0.22095	0.1137	-0.0174171	-0.0454314	0.0894982	0.0271541	0.0790279	0.632831	0.973644	0.819011	0.685955	0.986715
Dgkq	2.08726e+06	0.858	1.091	1.34	1.291	1.087	1.359	-0.22095	0.125651	0.422233	0.368489	0.120352	0.442545	0.747466	0.932059	0.537094	0.770492	0.90014	0.391937
Itgb1	2.80771e+06	0.859	0.981	0.843	0.86	1.226	1.017	-0.21927	-0.027675	-0.246395	-0.217591	0.293959	0.0243197	0.734133	0.96315	0.678915	0.786561	0.571155	0.999548
Slc44a2	4.36164e+06	1.029	0.704	0.782	1.069	0.983	1.009	0.041243	-0.506353	-0.354759	0.0962619	-0.0247367	0.0129262	0.962867	0.0703762	0.377701	0.987083	0.997587	0.986715
Ptgds	6.28216e+06	0.859	1.197	1.01	1.126	0.978	1.095	-0.21927	0.259423	0.0143553	0.171207	-0.0320936	0.130931	0.647854	0.522287	0.994889	0.960526	0.999918	0.934652
Mboat7	9.09747e+06	1.151	1.234	1.456	1.2	0.458	0.923	0.202888	0.303342	0.54201	0.263034	-1.12658	-0.115597	0.489159	0.342425	0.0472195	0.846455	0.000120286	0.864002
Svop	5.42828e+06	0.995	1.149	0.882	2.766	0.459	1.26	-0.00723157	0.200379	-0.181149	1.4678	-1.12343	0.333424	0.998683	0.69976	0.735926	1.35007e-09	2.36551e-06	0.311408
Raph1	2.15553e+06	0.86	1.038	0.897	0.996	1.093	1.084	-0.217591	0.0538064	-0.15682	-0.00578235	0.128293	0.116365	0.753255	0.996135	0.843871	0.973449	0.886966	0.974224
Cryzl2	3.53635e+06	0.86	0.973	0.863	1.069	1.116	1.108	-0.217591	-0.0394883	-0.212568	0.0962619	0.158337	0.147958	0.745107	0.95354	0.744379	0.987083	0.770879	0.927312
Rpl39	1.41085e+07	0.874	0.86	0.75	0.969	0.97	0.918	-0.194295	-0.217591	-0.415037	-0.0454314	-0.0439433	-0.123434	0.373238	0.39501	0.0502412	0.866538	0.98981	0.751103
Fcsk	1.71596e+06	0.861	1.139	1.042	0.91	1.141	1.059	-0.215915	0.187768	0.0593553	-0.136062	0.190299	0.0827026	0.754205	0.892941	0.983425	0.861678	0.774642	0.979047
Nos1	7.99236e+06	0.862	1.016	0.973	1.058	0.964	1.015	-0.21424	0.0229004	-0.0394883	0.0813396	-0.0528949	0.0214797	0.669228	0.999791	0.961997	0.989454	0.984131	0.999853
Rab2a	1.59194e+06	0.853	1.421	1.237	0.625	1.366	0.834	-0.229382	0.506907	0.306846	-0.678072	0.449957	-0.261881	0.732913	0.226208	0.79271	0.0616242	0.303278	0.657557
Tomm6	4.2497e+06	0.863	1.291	1.126	0.778	1.346	1.047	-0.212568	0.368489	0.171207	-0.362158	0.428678	0.0662614	0.692281	0.231742	0.851013	0.355632	0.11863	0.986715
Ccdc127	2.36722e+06	0.863	0.833	0.75	1.14	1.006	0.998	-0.212568	-0.263612	-0.415037	0.189034	0.00863031	-0.00288828	0.768817	0.569085	0.277794	0.912606	0.973626	0.985307
Srp72	1.61695e+06	0.863	1.152	1.068	1.188	0.94	1.109	-0.212568	0.204141	0.0949116	0.248535	-0.0892673	0.149259	0.798441	0.89278	0.976228	0.884248	0.980338	0.943203
Zfyve1	736311	0.863	1.348	1.236	1.309	0.863	1.15	-0.212568	0.43082	0.305679	0.388465	-0.212568	0.201634	0.840614	0.532405	0.843871	0.866538	0.964994	0.931364
Psma3	8.80519e+07	0.864	1.03	0.863	0.921	1.045	0.945	-0.210897	0.0426443	-0.212568	-0.118727	0.0635029	-0.0816138	0.0431412	0.921831	0.304931	0.504155	0.813561	0.804343
Mrpl1	1.80171e+06	0.864	1.082	0.891	1.01	0.808	0.882	-0.210897	0.1137	-0.166503	0.0143553	-0.307573	-0.181149	0.799037	0.944059	0.823666	0.963385	0.840058	0.817687
Wnk2	7.2101e+06	0.864	1.078	0.937	1.129	0.981	1.007	-0.210897	0.108357	-0.093879	0.175045	-0.027675	0.0100637	0.616219	0.911823	0.907345	0.893348	0.996944	0.986715
Dynll2	6.31704e+07	0.865	1.148	1.112	1.02	1.045	1.126	-0.209228	0.199123	0.153157	0.0285692	0.0635029	0.171207	0.0919815	0.173715	0.620988	0.974391	0.81627	0.585327
Cntnap2	3.22198e+07	0.865	1.156	0.998	1.055	0.871	0.9	-0.209228	0.209141	-0.00288828	0.077243	-0.199255	-0.152003	0.188806	0.265083	0.989372	0.987083	0.629858	0.600084
Mobp	1.72459e+06	0.865	1.152	0.936	1.214	0.795	0.917	-0.209228	0.204141	-0.0954196	0.279768	-0.330973	-0.125006	0.85209	0.899853	0.923829	0.82935	0.450958	0.797375
Adcy5	3.89735e+07	1.015	0.946	0.97	1.065	0.478	0.802	0.0214797	-0.0800879	-0.0439433	0.0908534	-1.06492	-0.318326	0.966522	0.855058	0.95166	0.989454	2.82645e-05	0.284256
Sort1	1.09464e+07	0.866	1.122	1.023	1.034	1.002	1.034	-0.207561	0.166073	0.0328061	0.0482362	0.00288251	0.0482362	0.399183	0.720357	0.992578	0.993885	0.964994	0.983544
Opcml	6.32071e+06	0.867	0.98	0.848	0.855	0.916	0.803	-0.205896	-0.0291463	-0.237864	-0.226004	-0.12658	-0.316528	0.676369	0.966572	0.616786	0.52398	0.924845	0.168026
Gripap1	1.29786e+07	0.867	1.083	0.919	0.986	1.007	0.958	-0.205896	0.115033	-0.121863	-0.0203404	0.0100637	-0.0619024	0.379083	0.884333	0.823666	0.946874	0.973626	0.919478
Aimp1	9.71791e+06	0.868	0.945	0.828	0.877	1.187	1.071	-0.204233	-0.0816138	-0.272297	-0.189351	0.24732	0.0989585	0.427244	0.892941	0.379648	0.480142	0.408591	0.921851
Snx3	3.06245e+07	0.868	1.026	0.965	0.983	1.047	0.931	-0.204233	0.0370307	-0.0513992	-0.0247367	0.0662614	-0.103147	0.211458	0.961735	0.936143	0.89989	0.90695	0.812194
Ptbp1	1.24032e+06	0.868	1.274	1.076	1.098	0.872	1.021	-0.204233	0.349365	0.105678	0.134878	-0.1976	0.0299829	0.858693	0.636901	0.970806	0.994798	0.952109	0.986715
Dlgap4	7.94728e+06	0.868	0.917	0.81	1.183	0.827	0.912	-0.204233	-0.125006	-0.304006	0.24245	-0.274041	-0.132894	0.586789	0.80327	0.363773	0.770492	0.614782	0.780316
Tcea1	3.90619e+06	1.127	0.712	0.86	1.058	1.004	1.076	0.172488	-0.490051	-0.217591	0.0813396	0.00575927	0.105678	0.773182	0.019931	0.671876	0.994798	0.974647	0.958319
Tspan7	2.92475e+07	0.869	1.177	1.044	0.954	1.199	1.043	-0.202572	0.235114	0.0621217	-0.0679388	0.261832	0.0607392	0.231332	0.246383	0.955295	0.809504	0.205179	0.95009
Axin1	7.86498e+06	1.1	0.717	0.793	0.938	1.192	1.077	0.137504	-0.479955	-0.334607	-0.0923402	0.253384	0.107018	0.7884	0.00781382	0.253775	0.784461	0.394883	0.901509
Rab12	8.47565e+06	1.339	0.718	0.948	1.17	0.721	0.859	0.421156	-0.477944	-0.077041	0.226509	-0.471929	-0.21927	0.057031	0.0209461	0.919639	0.886505	0.373236	0.574374
Prodh	5.81623e+06	0.87	1.156	1.129	1.077	1.065	1.225	-0.200913	0.209141	0.175045	0.107018	0.0908534	0.292782	0.704054	0.694194	0.851013	0.975849	0.929869	0.662003
Syt2	1.88411e+07	0.87	1.006	0.811	1.174	0.928	1.109	-0.200913	0.00863031	-0.302226	0.231432	-0.107803	0.149259	0.300601	0.999791	0.244054	0.727531	0.942158	0.751041
Camk2g	1.31423e+07	0.871	0.946	0.84	0.912	1.184	1.04	-0.199255	-0.0800879	-0.251539	-0.132894	0.243669	0.0565835	0.352772	0.89745	0.38964	0.676854	0.453635	0.979513
Mtss2	523088	0.871	1.109	0.948	1.031	0.817	0.881	-0.199255	0.149259	-0.077041	0.0440443	-0.291592	-0.182786	0.858693	0.932442	0.947388	0.974391	0.918684	0.817687
Kctd16	4.74105e+08	0.871	1.045	0.866	1.034	1.041	1.029	-0.199255	0.0635029	-0.207561	0.0482362	0.0579701	0.041243	0.00642312	0.736703	0.226086	0.987083	0.792117	0.964796
Dnm1l	5.73702e+06	1.251	0.72	0.949	0.983	0.814	0.803	0.323082	-0.473931	-0.07552	-0.0247367	-0.296899	-0.316528	0.308446	0.0250681	0.933901	0.94807	0.517541	0.240731
Trim46	2.63239e+06	0.871	1.081	0.948	1.242	0.848	1.135	-0.199255	0.112367	-0.077041	0.312665	-0.237864	0.182692	0.782742	0.955314	0.929344	0.860879	0.90014	0.933557
Avl9	7.3147e+06	0.872	1.043	0.949	0.906	1.016	0.856	-0.1976	0.0607392	-0.07552	-0.142417	0.0229004	-0.224317	0.558696	0.96249	0.923813	0.744325	0.962235	0.434687
Tf	1.2526e+08	0.872	1.099	0.931	0.934	1.024	0.918	-0.1976	0.136191	-0.103147	-0.0985055	0.0342157	-0.123434	0.0343017	0.304088	0.803539	0.540654	0.883427	0.501166
Rcn2	3.73802e+06	0.872	1.258	1.104	0.991	1.29	1.223	-0.1976	0.331132	0.14274	-0.013043	0.367371	0.290424	0.764275	0.554388	0.915769	0.963385	0.496467	0.780316
Entpd2	1.07775e+07	0.872	1.095	0.979	1.065	1.057	1.102	-0.1976	0.130931	-0.0306192	0.0908534	0.0799754	0.140124	0.449444	0.843088	0.961997	0.97792	0.873404	0.850356
Tnc	947509	0.872	1.508	1.433	1.473	0.773	1.215	-0.1976	0.592636	0.519039	0.558757	-0.37146	0.280956	0.855108	0.347277	0.478935	0.479854	0.741868	0.780499
Rasa1	1.42362e+06	0.873	1.034	0.933	1.035	1.024	1.029	-0.195946	0.0482362	-0.100051	0.0496308	0.0342157	0.041243	0.826424	0.988767	0.930634	0.994798	0.958874	0.999548
Cdk18	7.83483e+06	0.874	1.221	1.007	0.968	1.136	1.176	-0.194295	0.288063	0.0100637	-0.046921	0.183963	0.233888	0.601582	0.355278	0.992692	0.926132	0.740753	0.681744
Btf3	3.99125e+06	1.114	1.156	1.282	1.671	0.48	0.977	0.155749	0.209141	0.358396	0.740712	-1.05889	-0.0335695	0.805197	0.870935	0.51265	0.153232	0.000984991	0.960526
Csnk1e	944920	0.874	1.012	0.893	1.146	1.155	1.434	-0.194295	0.0172093	-0.163268	0.196607	0.207893	0.520045	0.866627	0.998187	0.874362	0.93052	0.789415	0.283903
rps14	4.67317e+07	0.875	1.059	0.933	0.936	0.996	0.927	-0.192645	0.0827026	-0.100051	-0.0954196	-0.00578235	-0.109359	0.177654	0.843444	0.843871	0.608939	0.960082	0.753979
Eci2	9.8465e+06	0.875	1.177	1.028	0.937	1.206	1.178	-0.192645	0.235114	0.0398403	-0.093879	0.27023	0.23634	0.48537	0.446572	0.991875	0.79766	0.298666	0.515999
Cnn3	6.08215e+06	0.875	1.069	0.899	0.955	1.062	1.013	-0.192645	0.0962619	-0.153607	-0.0664274	0.0867838	0.0186342	0.59366	0.901835	0.794714	0.825748	0.86554	0.999548
Tbcc	1.00675e+07	0.875	0.985	0.866	1.163	0.936	1.092	-0.192645	-0.0218044	-0.207561	0.217851	-0.0954196	0.126973	0.465344	0.969211	0.629882	0.786093	0.963215	0.875597
Dnajb4	8.90268e+06	0.876	1.064	0.927	1.025	1	1.004	-0.190997	0.0894982	-0.109359	0.0356239	0	0.00575927	0.555171	0.917179	0.870259	0.989425	0.973626	0.986715
Tsc2	3.23251e+06	0.876	0.972	0.872	1.508	0.67	1.027	-0.190997	-0.0409718	-0.1976	0.592636	-0.577767	0.0384362	0.77021	0.964336	0.787921	0.37435	0.198984	0.996238
Reep5	6.72265e+07	0.877	1.059	0.925	0.937	1.056	0.975	-0.189351	0.0827026	-0.112475	-0.093879	0.0786098	-0.0365259	0.153621	0.809787	0.794714	0.61821	0.741868	0.949457
Magi1	1.29479e+07	0.877	1.061	0.951	0.954	0.927	0.847	-0.189351	0.0854247	-0.0724828	-0.0679388	-0.109359	-0.239566	0.461877	0.920053	0.919099	0.836402	0.944926	0.285419
Plppr4	2.129e+07	0.877	0.995	0.855	0.97	0.968	0.966	-0.189351	-0.00723157	-0.226004	-0.0439433	-0.046921	-0.0499049	0.36396	0.988849	0.482155	0.843452	0.976709	0.92228
Hmgcs1	2.08488e+07	0.852	0.922	0.753	0.875	1.238	1.099	-0.231075	-0.117161	-0.409278	-0.192645	0.308011	0.136191	0.134014	0.700669	0.0117147	0.235102	0.100491	0.77779
Septin5	5.19037e+06	1.428	1.128	1.691	1.618	0.356	0.631	0.513996	0.173767	0.757877	0.694212	-1.49005	-0.664288	0.0456386	0.901835	0.00356294	0.196418	8.72562e-08	0.00911646
Ahsg	4.7635e+06	0.878	1.161	1.031	1.084	0.92	1.097	-0.187707	0.215368	0.0440443	0.116365	-0.120294	0.133564	0.7884	0.782366	0.973644	0.973449	0.931601	0.919267
Ak9	1.11937e+07	1.248	1.037	1.22	1.588	0.277	0.637	0.319618	0.0524159	0.286881	0.667211	-1.85204	-0.650635	0.078979	0.966572	0.488381	0.036799	2.21282e-16	3.63313e-05
Flii	512975	0.879	1.14	0.959	0.754	1.287	1.043	-0.186065	0.189034	-0.0603973	-0.407364	0.364012	0.0607392	0.885085	0.93664	0.959937	0.610796	0.646197	0.996385
Cnbp	2.5185e+06	0.879	1.008	0.862	0.78	1.132	0.887	-0.186065	0.0114956	-0.21424	-0.358454	0.178874	-0.172994	0.809986	0.989292	0.753992	0.552162	0.732286	0.666882
Kif3c	1.13149e+06	0.879	1.046	0.965	0.886	1.182	1.117	-0.186065	0.0648829	-0.0513992	-0.174621	0.24123	0.159629	0.882273	0.981003	0.961997	0.806365	0.753079	0.95009
Rabep1	7.97438e+06	0.879	0.871	0.801	0.917	1.053	0.978	-0.186065	-0.199255	-0.320126	-0.125006	0.0745054	-0.0320936	0.557666	0.464564	0.284983	0.738935	0.880401	0.956586
Psmd4	1.84283e+07	0.879	1.048	0.913	0.952	1.089	1.053	-0.186065	0.0676387	-0.131313	-0.0709665	0.123004	0.0745054	0.409872	0.924856	0.804185	0.770063	0.673974	0.941263
Eprs1	4.78247e+07	0.879	1.014	0.912	0.955	0.945	0.901	-0.186065	0.0200577	-0.132894	-0.0664274	-0.0816138	-0.150401	0.198433	0.976185	0.723684	0.787118	0.951532	0.535156
Clip2	7.01764e+07	0.879	1.093	0.939	1.018	0.926	0.923	-0.186065	0.128293	-0.0908029	0.0257376	-0.110916	-0.115597	0.125229	0.569085	0.870259	0.987083	0.874771	0.667273
Rps23	1.62432e+07	0.879	1.116	0.958	1.043	0.945	0.995	-0.186065	0.158337	-0.0619024	0.0607392	-0.0816138	-0.00723157	0.386178	0.720978	0.929344	0.998267	0.964895	0.984371
Cpt1a	2.36584e+06	0.879	1.261	1.186	1.183	0.919	0.954	-0.186065	0.334568	0.246104	0.24245	-0.121863	-0.0679388	0.805197	0.628024	0.807133	0.893141	0.96388	0.934479
Rpl31	4.39288e+07	0.88	1.01	0.898	0.94	1.09	1.028	-0.184425	0.0143553	-0.155213	-0.0892673	0.124328	0.0398403	0.205485	0.985424	0.633743	0.687736	0.561861	0.977734
Rps8	9.46883e+07	0.88	1.022	0.915	0.969	0.948	0.927	-0.184425	0.0313952	-0.128156	-0.0454314	-0.077041	-0.109359	0.0732676	0.94425	0.712327	0.843063	0.943558	0.662669
Abcd3	7.72236e+06	0.88	0.972	0.896	0.996	0.947	0.969	-0.184425	-0.0409718	-0.158429	-0.00578235	-0.0785637	-0.0454314	0.688822	0.952657	0.753992	0.940163	0.973626	0.931364
Dnajb6	2.3831e+07	0.88	0.953	0.888	1.183	0.823	0.973	-0.184425	-0.0694519	-0.171368	0.24245	-0.281036	-0.0394883	0.33179	0.884377	0.621067	0.52398	0.313235	0.95009
Chmp4b	1.42496e+07	0.88	1.223	1.019	100		100	-0.184425	0.290424	0.0271541	6.64386	#VALUE!	6.64386	0.410581	0.226581	0.996392	2.67297e-16		2.24357e-16
Cpne4	4.59235e+06	0.881	0.964	0.86	1.017	0.951	0.995	-0.182786	-0.0528949	-0.217591	0.0243197	-0.0724828	-0.00723157	0.663917	0.927868	0.65739	0.96452	0.973626	0.986715
Smpd3	6.39286e+06	0.881	1.011	0.939	1.034	0.973	1.018	-0.182786	0.015783	-0.0908029	0.0482362	-0.0394883	0.0257376	0.760295	0.998187	0.924937	0.994798	0.98607	0.999853
Nlgn4	1.23213e+06	0.882	1.319	1.001	0.938	0.921	0.785	-0.181149	0.399445	0.00144197	-0.0923402	-0.118727	-0.349235	0.81897	0.433006	0.985493	0.900492	0.958874	0.362487
Babam2	3.7272e+06	0.882	1.036	0.884	1.051	0.899	0.99	-0.181149	0.051024	-0.177882	0.0717627	-0.153607	-0.0144996	0.798441	0.985969	0.824085	0.994798	0.900091	0.977044
Rps6	2.49704e+08	0.883	1.016	0.91	0.936	1.061	0.997	-0.179515	0.0229004	-0.136062	-0.0954196	0.0854247	-0.00433459	0.0195443	0.927976	0.630488	0.540686	0.649818	0.982367
Actl6b	4.16228e+06	0.883	0.861	0.781	1.05	1.027	1.078	-0.179515	-0.215915	-0.356606	0.0703893	0.0384362	0.108357	0.809289	0.782114	0.422615	0.998267	0.960968	0.95009
Mtx1	6.31916e+06	1.02	1.222	1.278	3.177	0.415	1.336	0.0285692	0.289244	0.353888	1.66767	-1.26882	0.41792	0.970221	0.570822	0.389772	1.12489e-07	0.000599912	0.43401
Ppm1e	7.27354e+07	0.884	1.003	0.886	0.941	1.031	0.966	-0.177882	0.00432161	-0.174621	-0.0877334	0.0440443	-0.0499049	0.157571	0.998478	0.516007	0.582915	0.857616	0.878912
Gpm6b	3.91804e+07	0.884	1.038	0.937	0.997	0.963	0.963	-0.177882	0.0538064	-0.093879	-0.00433459	-0.0543923	-0.0543923	0.274697	0.923039	0.862507	0.919106	0.996944	0.921851
Trappc5	409452	0.884	1.263	1.11	1.152	1.136	1.374	-0.177882	0.336855	0.15056	0.204141	0.183963	0.458382	0.89008	0.852109	0.973644	0.987083	0.855118	0.624104
Sms	9.528e+06	0.884	1.171	0.928	1.166	0.961	1.102	-0.177882	0.227741	-0.107803	0.221568	-0.0573917	0.140124	0.648235	0.562818	0.878768	0.767774	0.978138	0.807218
Psip1	1.80559e+07	0.852	0.91	0.766	0.965	0.958	0.949	-0.231075	-0.136062	-0.384584	-0.0513992	-0.0619024	-0.07552	0.191787	0.573255	0.0544279	0.827195	0.982469	0.882512
Rbm3	1.5915e+07	0.885	1.151	1.014	0.972	1.128	1.114	-0.176251	0.202888	0.0200577	-0.0409718	0.173767	0.155749	0.477529	0.548923	0.993528	0.866538	0.626985	0.785252
Shisa7	1.72254e+07	0.885	1.066	0.918	0.993	0.969	0.984	-0.176251	0.0922074	-0.123434	-0.0101344	-0.0454314	-0.0232698	0.514961	0.901835	0.820085	0.92533	0.987609	0.965709
Camk4	2.99358e+07	0.885	1.078	0.946	0.998	0.999	0.911	-0.176251	0.108357	-0.0800879	-0.00288828	-0.00144342	-0.134477	0.364207	0.788321	0.892055	0.952431	0.972921	0.737933
Ptrh2	4.51847e+06	0.886	1.176	1.005	1.234	1.164	1.351	-0.174621	0.233888	0.0071955	0.303342	0.219091	0.434028	0.80316	0.700669	0.999389	0.802556	0.742394	0.335052
Adk	597987	0.886	1.265	1.44	1.5	0.576	0.834	-0.174621	0.339137	0.526069	0.584963	-0.795859	-0.261881	0.876883	0.820118	0.620273	0.757679	0.376296	0.754127
Cryl1	3.49444e+06	1.174	0.62	0.787	1.113	0.532	0.646	0.231432	-0.68966	-0.345564	0.154454	-0.910502	-0.630394	0.745313	0.0458272	0.422725	0.963385	0.0296426	0.0258135
Fmr1	5.33946e+06	0.887	1.373	1.193	0.948	0.961	1.029	-0.172994	0.457332	0.254594	-0.077041	-0.0573917	0.041243	0.7884	0.15116	0.671876	0.910524	0.973626	0.999853
Gprc5b	4.58101e+06	0.887	1.227	1.09	1.042	0.871	0.9	-0.172994	0.295135	0.124328	0.0593553	-0.199255	-0.152003	0.798441	0.531297	0.917778	0.997689	0.791528	0.719629
Serpinb9	354985	0.887	1.247	1.071	1.413	0.769	1.061	-0.172994	0.318461	0.0989585	0.498761	-0.378944	0.0854247	0.893452	0.868287	0.992578	0.839795	0.886222	0.986715
Grn	5.31504e+06	0.888	0.939	0.84	0.902	1.145	1.019	-0.171368	-0.0908029	-0.251539	-0.148801	0.195348	0.0271541	0.799037	0.904584	0.633743	0.864543	0.765365	0.999853
Ddc	1.3298e+07	1.212	0.94	1.002	0.673	1.348	0.969	0.27739	-0.0892673	0.00288251	-0.571322	0.43082	-0.0454314	0.161376	0.89278	0.992372	0.0550241	0.193195	0.940676
	1.19321e+07	0.888	1.073	1.002	1.008	0.869	0.895	-0.171368	0.10165	0.00288251	0.0114956	-0.202572	-0.16004	0.554796	0.901835	0.985483	0.975399	0.774642	0.681718
Pak3	1.48761e+07	0.888	0.958	0.89	1.01	1.015	1.083	-0.171368	-0.0619024	-0.168123	0.0143553	0.0214797	0.115033	0.461877	0.912232	0.688858	0.960477	0.958874	0.885858
Pja1	6.72165e+06	0.888	0.954	0.874	1.192	0.898	1.081	-0.171368	-0.0679388	-0.194295	0.253384	-0.155213	0.112367	0.729447	0.920053	0.715985	0.746249	0.886966	0.921851
Suclg2	3.38352e+06	0.889	1.089	0.956	0.869	1.252	1.115	-0.169745	0.123004	-0.0649175	-0.202572	0.324235	0.157044	0.837219	0.943361	0.949617	0.801769	0.571155	0.937633
Kif3a	4.41486e+06	0.889	1.129	1.016	0.99	1.05	1.008	-0.169745	0.175045	0.0229004	-0.0144996	0.0703893	0.0114956	0.809846	0.895657	0.992023	0.965669	0.939893	0.986715
Map2	5.1156e+06	0.889	0.994	0.889	1.028	0.936	0.974	-0.169745	-0.00868224	-0.169745	0.0398403	-0.0954196	-0.0380063	0.793208	0.974827	0.805129	0.993885	0.949977	0.95009
Supv3l1	548547	0.889	1.118	1.234	1.824	0.6	1.231	-0.169745	0.16092	0.303342	0.867106	-0.736966	0.299831	0.893747	0.961548	0.88281	0.445652	0.51262	0.844948
Lmtk3	2.25412e+06	0.89	1.231	1.128	0.856	1.013	0.914	-0.168123	0.299831	0.173767	-0.224317	0.0186342	-0.129734	0.852598	0.704146	0.921319	0.758401	0.973626	0.871453
Clmn	1.21515e+06	0.89	0.943	1.072	0.93	1.093	0.975	-0.168123	-0.0846703	0.100305	-0.104697	0.128293	-0.0365259	0.887352	0.936685	0.973644	0.866538	0.85935	0.949457
Map4	1.34984e+08	0.89	1.009	0.905	0.943	1.01	0.969	-0.168123	0.0129262	-0.14401	-0.0846703	0.0143553	-0.0454314	0.0763885	0.974827	0.604935	0.601811	0.944926	0.890011
Gja1	1.03e+08	0.89	1.073	0.984	0.985	1.031	1.033	-0.168123	0.10165	-0.0232698	-0.0218044	0.0440443	0.0468403	0.115373	0.632831	0.982523	0.87692	0.855118	0.955151
Cask	7.48759e+07	0.89	1.017	0.922	0.998	0.972	0.955	-0.168123	0.0243197	-0.117161	-0.00288828	-0.0409718	-0.0664274	0.195284	0.969211	0.76828	0.930942	0.997978	0.88771
Krt28	469336	0.982	0.445	0.53	1.876	0.487	0.988	-0.0262051	-1.16812	-0.915936	0.90766	-1.03801	-0.0174171	0.990037	0.000883695	0.0149096	0.101747	0.0122227	0.968101
Pik3c3	6.07586e+06	0.89	1.154	0.968	1.176	1.074	1.194	-0.168123	0.206643	-0.046921	0.233888	0.102994	0.255803	0.765705	0.70888	0.961997	0.772543	0.849457	0.515448
D430041D05Rik	3.15091e+06	1.18	0.823	0.975	0.683	1.249	0.886	0.238787	-0.281036	-0.0365259	-0.550043	0.320773	-0.174621	0.704054	0.629144	0.961997	0.0661682	0.466769	0.787234
H3-3a; H3-3b	1.98231e+07	1.098	1.018	1.331	2.241	0.488	1.152	0.134878	0.0257376	0.412511	1.16414	-1.03505	0.204141	0.645439	0.988767	0.0792732	2.09485e-12	2.8348e-08	0.493344
Myo6	6.90147e+06	0.891	0.977	0.819	1.14	0.951	1.05	-0.166503	-0.0335695	-0.288065	0.189034	-0.0724828	0.0703893	0.732913	0.95834	0.424499	0.841985	0.973626	0.956724
Elob	2.34107e+07	0.891	0.873	0.88	1.188	0.955	1.133	-0.166503	-0.195946	-0.184425	0.248535	-0.0664274	0.180148	0.415054	0.324774	0.634268	0.593028	0.978138	0.616992
Sestd1	3.03219e+06	1.068	1.179	1.551	2.321	0.493	1.167	0.0949116	0.237564	0.633199	1.21475	-1.02034	0.222805	0.917146	0.832761	0.0965952	0.000526555	0.012038	0.871453
Mtmr1	6.38401e+06	0.892	1.089	1.25	0.904	0.828	0.82	-0.164884	0.123004	0.321928	-0.145605	-0.272297	-0.286304	0.809846	0.932059	0.497151	0.785349	0.622994	0.249826
Map7d1	7.50092e+06	0.892	1.014	0.887	1.038	0.907	0.917	-0.164884	0.0200577	-0.172994	0.0538064	-0.140826	-0.125006	0.798441	0.998187	0.744379	0.997068	0.910838	0.789834
Hnrnpdl	2.95348e+07	0.892	1.032	0.935	1.046	0.929	0.953	-0.164884	0.045443	-0.0969617	0.0648829	-0.106249	-0.0694519	0.419179	0.95354	0.858484	0.999663	0.944926	0.897996
Kif5b	9.05082e+06	0.892	0.919	0.862	1.072	0.93	0.937	-0.164884	-0.121863	-0.21424	0.100305	-0.104697	-0.093879	0.641621	0.797996	0.620955	0.974391	0.955686	0.866577
Tex2	3.44205e+06	0.892	1.391	1.295	1.478	0.774	1.153	-0.164884	0.476122	0.372952	0.563646	-0.369595	0.205393	0.81897	0.214482	0.546138	0.392135	0.606525	0.864002
Cadm4	9.02348e+07	0.893	1.017	0.903	0.935	1.068	1	-0.163268	0.0243197	-0.147202	-0.0969617	0.0949116	0	0.124375	0.958483	0.634268	0.613187	0.673974	0.986715
Galk1	3.30891e+06	0.893	1.194	1.034	1.136	1.054	1.171	-0.163268	0.255803	0.0482362	0.183963	0.0758749	0.227741	0.825967	0.743608	0.989372	0.94807	0.925688	0.830773
Bri3bp	9.60752e+06	0.894	1.036	0.916	0.852	1.134	0.986	-0.161653	0.051024	-0.12658	-0.231075	0.181421	-0.0203404	0.625926	0.970822	0.851013	0.419084	0.581809	0.968426
KRT9	1.25281e+08	0.679	1.174	0.768	1.637	0.362	0.656	-0.558517	0.231432	-0.380822	0.711054	-1.46594	-0.608232	2.80253e-16	0.00757626	0.00221169	9.41594e-14	2.21282e-16	1.60678e-11
Lrrc4b	2.04169e+06	0.894	1.034	0.953	1.073	0.895	0.962	-0.161653	0.0482362	-0.0694519	0.10165	-0.16004	-0.0558912	0.856539	0.993253	0.936334	0.974391	0.886966	0.923784
Rps28	1.60844e+07	0.894	1.143	0.996	1.081	1.078	1.157	-0.161653	0.192825	-0.00578235	0.112367	0.108357	0.210389	0.520718	0.570822	0.985483	0.963385	0.90695	0.710913
C1qbp	6.84968e+07	0.894	1.132	1.013	1.118	0.982	1.091	-0.161653	0.178874	0.0186342	0.16092	-0.0262051	0.125651	0.233946	0.252315	0.973644	0.751401	0.981378	0.777071
Pcdh10	7.5926e+06	0.894	1.07	0.944	1.21	0.743	0.913	-0.161653	0.0976108	-0.0831412	0.275007	-0.428566	-0.131313	0.743555	0.920053	0.915769	0.700802	0.200451	0.780499
Habp4	2.05074e+06	0.895	1.061	0.97	0.899	0.844	0.802	-0.16004	0.0854247	-0.0439433	-0.153607	-0.244685	-0.318326	0.855108	0.969211	0.955295	0.844651	0.873728	0.509521
Map4	2.11861e+07	0.895	1.082	0.975	1.021	0.892	0.907	-0.16004	0.1137	-0.0365259	0.0299829	-0.164884	-0.140826	0.482099	0.811827	0.961997	0.974593	0.811663	0.662064
Tmx4	1.5305e+07	0.895	0.89	0.793	1.026	1.036	1.055	-0.16004	-0.168123	-0.334607	0.0370307	0.051024	0.077243	0.532976	0.593041	0.143372	0.986587	0.930549	0.948228
Anxa6	1.50503e+07	0.895	1.088	0.975	1.065	1.07	1.15	-0.16004	0.121679	-0.0365259	0.0908534	0.0976108	0.201634	0.526914	0.847606	0.959937	0.981083	0.86195	0.656763
Rdx	2.1338e+06	0.895	1.143	0.958	1.206	1.071	1.133	-0.16004	0.192825	-0.0619024	0.27023	0.0989585	0.180148	0.85209	0.881979	0.941501	0.866538	0.920738	0.890011
Rab6a	5.45879e+06	1.062	0.75	0.827	0.799	1.011	0.86	0.0867838	-0.415037	-0.274041	-0.323733	0.015783	-0.217591	0.892151	0.0461149	0.499254	0.251784	0.973088	0.508725
Trim9	5.18725e+06	0.896	0.976	0.802	0.893	1.059	0.906	-0.158429	-0.0350469	-0.318326	-0.163268	0.0827026	-0.142417	0.798441	0.952657	0.452112	0.740742	0.920738	0.784493
Adrm1	6.32295e+06	0.896	1.042	0.932	0.989	0.999	1.033	-0.158429	0.0593553	-0.101598	-0.0159576	-0.00144342	0.0468403	0.79592	0.975037	0.889544	0.960526	0.98607	0.986715
Gm45713	6.92312e+07	0.896	1.052	0.952	1.026	0.945	0.97	-0.158429	0.0731347	-0.0709665	0.0370307	-0.0816138	-0.0439433	0.31078	0.865237	0.915769	0.994798	0.947773	0.933316
C9orf72	567875	0.896	1.037	0.882	1.175	1.043	1.186	-0.158429	0.0524159	-0.181149	0.232661	0.0607392	0.246104	0.894717	0.998945	0.869027	0.973449	0.937856	0.890778
5730455P16Rik	1.85269e+06	1.645	0.69	1.177	2.51	0.506	1.268	0.718088	-0.535332	0.235114	1.32769	-0.982791	0.342555	0.0526402	0.206315	0.877358	0.000352684	0.0165681	0.647176
Ecsit	475587	0.896	1.169	1.076	1.735	0.497	0.88	-0.158429	0.225275	0.105678	0.794936	-1.00868	-0.184425	0.894717	0.927868	0.989372	0.588876	0.157829	0.858817
Zfand2b	2.02031e+06	0.897	1.356	1.19	0.919	0.913	0.878	-0.15682	0.439357	0.250962	-0.121863	-0.131313	-0.187707	0.866627	0.360368	0.842387	0.881742	0.960082	0.756691
Arl8a	9.93561e+06	1.453	0.757	1.083	0.913	1.206	1.03	0.539035	-0.401635	0.115033	-0.131313	0.27023	0.0426443	0.00274842	0.0582752	0.926631	0.782636	0.460207	0.989044
Nucb1	3.2125e+06	0.898	1.369	1.175	0.751	1.468		-0.155213	0.453122	0.232661	-0.413115	0.553852	#VALUE!	0.842457	0.219897	0.79172	0.432634	0.273053
Wasf3	1.96415e+07	0.898	1.061	0.98	0.871	1.124	0.999	-0.155213	0.0854247	-0.0291463	-0.199255	0.168642	-0.00144342	0.486327	0.895657	0.968695	0.20555	0.370227	0.986715
Naxd	1.34533e+06	0.898	1.11	0.961	0.893	0.858	0.788	-0.155213	0.15056	-0.0573917	-0.163268	-0.22095	-0.343732	0.885085	0.923141	0.955295	0.834386	0.887725	0.441436
Abcb1b	3.45479e+06	0.898	1.216	0.912	0.96	0.882	0.864	-0.155213	0.282143	-0.132894	-0.0588937	-0.181149	-0.210897	0.863649	0.700669	0.888511	0.93759	0.900091	0.716895
Eif5a	1.58967e+08	0.898	1.08	0.993	0.993	0.943	0.93	-0.155213	0.111031	-0.0101344	-0.0101344	-0.0846703	-0.104697	0.0698563	0.446572	0.995162	0.919106	0.883427	0.590239
Ptprd	1.48451e+07	0.898	1.009	0.958	1.039	0.971	0.97	-0.155213	0.0129262	-0.0619024	0.0551957	-0.0424568	-0.0439433	0.543147	0.998187	0.933901	0.994798	0.991332	0.934369
Slc7a14	2.03827e+07	1.188	0.76	0.916	1.14	0.946	1.077	0.248535	-0.395929	-0.12658	0.189034	-0.0800879	0.107018	0.141382	0.0127618	0.807911	0.686245	0.973626	0.856104
Anxa2	4.13169e+06	1.05	1.235	1.247	2.064	0.509	1.09	0.0703893	0.304511	0.318461	1.04544	-0.974262	0.124328	0.933378	0.626853	0.601238	0.00830417	0.0102787	0.943203
Hdlbp	3.68126e+06	0.899	0.948	0.756	0.849	0.968	0.938	-0.153607	-0.077041	-0.403542	-0.236164	-0.046921	-0.0923402	0.855108	0.92364	0.285259	0.764314	0.996944	0.914013
Usp11	1.12113e+06	0.899	1.094	0.951	0.899	1.012	0.932	-0.153607	0.129613	-0.0724828	-0.153607	0.0172093	-0.101598	0.894717	0.974827	0.952413	0.884113	0.958874	0.931364
Arhgap32	2.04885e+07	0.899	1.071	0.969	0.972	0.94	1.013	-0.153607	0.0989585	-0.0454314	-0.0409718	-0.0892673	0.0186342	0.598531	0.896839	0.95908	0.866538	0.952789	0.999853
Apex1	8.9019e+06	0.899	1.163	0.952	1.158	0.96	1.099	-0.153607	0.217851	-0.0709665	0.211635	-0.0588937	0.136191	0.686259	0.575177	0.924072	0.795771	0.987127	0.855727
Slc25a18	2.90181e+07	0.9	1.166	1.128	0.932	0.99	0.953	-0.152003	0.221568	0.173767	-0.101598	-0.0144996	-0.0694519	0.510692	0.273838	0.67202	0.666076	0.973626	0.901509
Rpl13	7.08086e+07	0.9	1.012	0.899	0.953	1.058	1.014	-0.152003	0.0172093	-0.153607	-0.0694519	0.0813396	0.0200577	0.327643	0.983927	0.626747	0.770063	0.760531	0.989102
Scamp5	1.37833e+08	0.9	0.994	0.93	1.104	1.011	1.16	-0.152003	-0.00868224	-0.104697	0.14274	0.015783	0.214125	0.132392	0.998187	0.798695	0.691033	0.942342	0.143259
Apmap	4.17277e+07	0.9	1.156	1.112	1.207	0.964	1.072	-0.152003	0.209141	0.153157	0.271426	-0.0528949	0.100305	0.414454	0.200923	0.747965	0.233092	0.997978	0.870014
Strn3	1.22418e+07	0.901	0.967	0.907	0.881	1.118	1.055	-0.150401	-0.0484122	-0.140826	-0.182786	0.16092	0.077243	0.683382	0.932059	0.790508	0.405402	0.612348	0.934369
Eif2s2	6.61278e+06	0.901	0.999	0.891	0.905	1.054	0.983	-0.150401	-0.00144342	-0.166503	-0.14401	0.0758749	-0.0247367	0.805626	0.989292	0.780805	0.751626	0.914825	0.957028
Purg	893908	0.901	0.923	0.845	0.925	1.185	1.013	-0.150401	-0.115597	-0.242977	-0.112475	0.244887	0.0186342	0.89008	0.923271	0.762844	0.886434	0.731692	0.986715
Rock2	9.80218e+07	0.901	1.002	0.922	0.953	0.985	0.96	-0.150401	0.00288251	-0.117161	-0.0694519	-0.0218044	-0.0588937	0.184947	0.998109	0.76229	0.751921	0.987609	0.883235
Cltb	1.58968e+08	0.901	1.038	0.93	0.965	1.13	1.108	-0.150401	0.0538064	-0.104697	-0.0513992	0.176323	0.147958	0.0798718	0.830712	0.762844	0.799207	0.164823	0.501166
Acsl3	5.47646e+06	1.134	0.763	0.821	0.897	1.262	1.254	0.181421	-0.390245	-0.284546	-0.15682	0.335712	0.326537	0.7037	0.0976781	0.539937	0.733261	0.295113	0.404745
Isoc1	1.14967e+06	0.901	0.967	0.858	1.155	0.944	1.077	-0.150401	-0.0484122	-0.22095	0.207893	-0.0831412	0.107018	0.885085	0.96315	0.726343	0.926872	0.98607	0.977734
Lrrc73	1.39369e+06	1.213	0.856	1.118	1.649	0.449	0.789	0.27858	-0.224317	0.16092	0.721591	-1.15521	-0.341903	0.753791	0.784198	0.931746	0.398894	0.00302939	0.498567
Reep2	3.69378e+06	0.902	1.099	1.034	0.841	1.189	1.03	-0.148801	0.136191	0.0482362	-0.249822	0.249749	0.0426443	0.858693	0.921831	0.974924	0.72341	0.708132	0.996238
Prss3b	5.71891e+07	1.113	1.062	1.132	0.818	0.776	0.669	0.154454	0.0867838	0.178874	-0.289827	-0.365871	-0.579922	0.335597	0.848168	0.581323	0.0192673	0.0225931	2.37031e-06
Ehbp1	703456	0.902	1.183	1.065	0.929	0.573	0.861	-0.148801	0.24245	0.0908534	-0.106249	-0.803393	-0.215915	0.894717	0.898166	0.980585	0.906188	0.335663	0.817687
Usp15	3.21212e+06	1.154	1.16	1.285	1.896	0.513	1.028	0.206643	0.214125	0.361768	0.922959	-0.962969	0.0398403	0.77021	0.88441	0.626747	0.0261821	0.00709105	0.999853
Rpl15	3.45747e+07	0.902	1.053	0.972	1.069	0.879	0.968	-0.148801	0.0745054	-0.0409718	0.0962619	-0.186065	-0.046921	0.482099	0.895657	0.955295	0.960526	0.717754	0.940676
Nup155	2.20612e+06	0.902	1.351	1.253	1.305	0.764	1.062	-0.148801	0.434028	0.325386	0.38405	-0.388355	0.0867838	0.876868	0.395587	0.738976	0.789914	0.779699	0.986715
Dazap1	2.24401e+07	1.359	0.889	1.29	0.723	1.2	0.892	0.442545	-0.169745	0.367371	-0.467932	0.263034	-0.164884	0.000780272	0.577696	0.100258	0.00481795	0.360328	0.564459
Drg1	1.64616e+06	0.903	1.124	1.012	0.967	0.976	0.923	-0.147202	0.168642	0.0172093	-0.0484122	-0.0350469	-0.115597	0.885085	0.902559	0.985483	0.929916	0.98607	0.890778
Ptges3	6.52907e+07	0.903	1.018	0.947	1.026	0.888	0.903	-0.147202	0.0257376	-0.0785637	0.0370307	-0.171368	-0.147202	0.390103	0.969211	0.892055	0.994798	0.622279	0.515999
Cpsf7	849595	0.903	0.982	0.928	1.047	0.91	0.934	-0.147202	-0.0262051	-0.107803	0.0662614	-0.136062	-0.0985055	0.904283	0.974827	0.92245	0.984082	0.98607	0.923917
Tm9sf3	2.90266e+06	2.226	0.549	1.302	2.505	0.514	1.259	1.15445	-0.865122	0.380729	1.32481	-0.96016	0.332278	1.19106e-05	0.00620918	0.577335	7.72852e-05	0.0246932	0.676549
Rps7	6.32542e+07	0.904	1.033	0.898	1.012	0.901	0.939	-0.145605	0.0468403	-0.155213	0.0172093	-0.150401	-0.0908029	0.431577	0.928779	0.634268	0.965617	0.795231	0.82724
Fgf12	1.09671e+07	0.904	1.138	1.024	1.04	0.878	0.922	-0.145605	0.186501	0.0342157	0.0565835	-0.187707	-0.117161	0.696732	0.610271	0.989372	0.999873	0.828065	0.81933
Oat	2.44729e+06	0.904	1.07	0.892	1.444	0.995	1.475	-0.145605	0.0976108	-0.164884	0.530071	-0.00723157	0.560715	0.871141	0.96315	0.823666	0.462354	0.973626	0.177598
Aplp2	785711	1.023	0.932	0.892	1.466	0.515	0.79	0.0328061	-0.101598	-0.164884	0.551885	-0.957356	-0.340075	0.991684	0.92364	0.88281	0.772482	0.0478631	0.515999
Pnp	2.79673e+07	0.905	1.03	0.961	0.926	1.082	0.95	-0.14401	0.0426443	-0.0573917	-0.110916	0.1137	-0.0740006	0.572422	0.961202	0.930634	0.587935	0.633611	0.887854
Rapgefl1	2.3149e+06	0.905	1.101	0.983	0.959	1.144	1.114	-0.14401	0.138814	-0.0247367	-0.0603973	0.194087	0.155749	0.884525	0.927868	0.963365	0.935215	0.789415	0.924906
Gap43	7.64786e+08	0.905	0.992	0.899	1.008	1.014	1.017	-0.14401	-0.011588	-0.153607	0.0114956	0.0200577	0.0243197	0.0884659	0.998187	0.516872	0.967043	0.932308	0.986715
Ephx1	1.20581e+07	0.905	1.271	1.107	1.028	0.999	1.039	-0.14401	0.345964	0.146655	0.0398403	-0.00144342	0.0551957	0.642618	0.101541	0.863558	0.987083	0.973626	0.977734
Nedd4l	2.23475e+06	0.905	0.817	1.082	1.283	1.109	1.442	-0.14401	-0.291592	0.1137	0.359521	0.149259	0.528071	0.875497	0.665295	0.961997	0.806365	0.885039	0.353493
Mrps31	569441	0.906	0.999	0.846	0.878	0.965	0.789	-0.142417	-0.00144342	-0.24127	-0.187707	-0.0513992	-0.341903	0.910237	0.989292	0.805129	0.827225	0.973626	0.574374
Tomm70	6.08631e+06	0.906	0.968	0.936	0.944	0.957	1.063	-0.142417	-0.046921	-0.0954196	-0.0831412	-0.0634092	0.0881416	0.848763	0.939723	0.89908	0.919329	0.98981	0.977734
Cdh13	3.82834e+07	0.906	0.976	0.903	1.049	1.003	1.13	-0.142417	-0.0350469	-0.147202	0.0690147	0.00432161	0.176323	0.543147	0.950098	0.693725	0.994798	0.965536	0.605775
Kif3b	1.78831e+06	0.906	0.968	0.885	1.058	0.972	0.972	-0.142417	-0.046921	-0.176251	0.0813396	-0.0409718	-0.0409718	0.887286	0.96315	0.823666	0.995218	0.999918	0.959122
Hdgf	4.55628e+07	0.907	1.059	0.914	0.904	1.079	1.003	-0.140826	0.0827026	-0.129734	-0.145605	0.109695	0.00432161	0.471529	0.852481	0.7024	0.403588	0.609109	0.999548
Pspc1	5.29044e+07	0.907	0.989	0.903	0.938	0.953	0.891	-0.140826	-0.0159576	-0.147202	-0.0923402	-0.0694519	-0.166503	0.439062	0.977198	0.634268	0.687574	0.960082	0.468067
Palm	2.14062e+08	0.907	1.081	0.967	1.009	1.018	1.021	-0.140826	0.112367	-0.0484122	0.0129262	0.0257376	0.0299829	0.0960085	0.348562	0.939636	0.971616	0.918191	0.983612
Ppp1r21	1.29745e+07	0.907	1.117	1.036	1.032	0.9	0.947	-0.140826	0.159629	0.051024	0.045443	-0.152003	-0.0785637	0.637998	0.720978	0.973644	0.991668	0.873404	0.881693
Eif3i	1.57339e+07	0.907	0.987	0.852	1.04	0.971	0.964	-0.140826	-0.018878	-0.231075	0.0565835	-0.0424568	-0.0528949	0.618781	0.972195	0.478935	0.994798	0.992455	0.92228
Rpl12	7.01293e+07	0.907	1.095	0.975	1.054	0.941	0.983	-0.140826	0.130931	-0.0365259	0.0758749	-0.0877334	-0.0247367	0.406026	0.560114	0.966763	0.965789	0.944926	0.960722
Homer2	9.90299e+06	0.908	0.933	1.062	0.925	0.942	0.881	-0.139236	-0.100051	0.0867838	-0.112475	-0.086201	-0.182786	0.847928	0.901835	0.955295	0.732406	0.960628	0.532756
Mast3	1.15428e+07	0.908	1	0.935	0.932	0.925	0.979	-0.139236	0	-0.0969617	-0.101598	-0.112475	-0.0306192	0.704054	0.993253	0.879489	0.767664	0.933686	0.951328
Arpc5l	3.21434e+07	0.908	1.118	0.996	0.97	1.058	1.002	-0.139236	0.16092	-0.00578235	-0.0439433	0.0813396	0.00288251	0.552565	0.487175	0.985493	0.813587	0.774642	0.988918
Hnrnph2	3.0079e+07	0.908	0.907	0.874	0.983	0.926	0.899	-0.139236	-0.140826	-0.194295	-0.0247367	-0.110916	-0.153607	0.568232	0.550671	0.520444	0.866538	0.930549	0.578055
C1qb	1.63358e+07	0.908	0.951	0.871	1.004	1.085	1.092	-0.139236	-0.0724828	-0.199255	0.00575927	0.117695	0.126973	0.677401	0.901835	0.626186	0.932089	0.677779	0.801782
Sord	1.30248e+06	0.908	1.078	0.97	1.039	0.975	1.023	-0.139236	0.108357	-0.0439433	0.0551957	-0.0365259	0.0328061	0.909639	0.956741	0.961997	0.981212	0.987609	0.989044
Gpc6	1.34234e+06	1.106	0.791	0.795	1.858	0.519	0.97	0.145351	-0.33825	-0.330973	0.893751	-0.946194	-0.0439433	0.911411	0.557825	0.598995	0.0289476	0.00727754	0.955587
Ilk	3.6307e+06	0.909	0.937	0.857	0.792	0.993	0.874	-0.137648	-0.093879	-0.222633	-0.336428	-0.0101344	-0.194295	0.884525	0.91131	0.723867	0.584057	0.978138	0.775265
Nrn1	2.97453e+07	0.909	1.104	0.998	0.846	1.22	1.033	-0.137648	0.14274	-0.00288828	-0.24127	0.286881	0.0468403	0.598531	0.632831	0.989795	0.143515	0.144186	0.968101
Mat2a	3.68093e+07	0.909	1.005	0.894	0.895	1.104	0.955	-0.137648	0.0071955	-0.161653	-0.16004	0.14274	-0.0664274	0.566442	0.998187	0.658238	0.344663	0.509046	0.901509
Sorbs2	1.92984e+07	0.979	0.792	0.782	1.14	0.853	1.02	-0.0306192	-0.336428	-0.354759	0.189034	-0.229382	0.0285692	0.972644	0.0293507	0.0786224	0.855466	0.732286	0.995889
Nap1l4	3.55598e+07	0.909	1.031	0.947	0.977	0.979	0.967	-0.137648	0.0440443	-0.0785637	-0.0335695	-0.0306192	-0.0484122	0.553055	0.943361	0.890607	0.866538	0.973626	0.931788
Ktn1	2.70305e+06	0.909	0.969	0.853	1.003	1.02	0.917	-0.137648	-0.0454314	-0.229382	0.00432161	0.0285692	-0.125006	0.885085	0.952657	0.682151	0.974593	0.958874	0.876834
Mms19	2.02561e+06	0.909	1.09	1.121	1.2	0.859	1.04	-0.137648	0.124328	0.164786	0.263034	-0.21927	0.0565835	0.883209	0.943315	0.929657	0.866538	0.909622	0.999548
Flna	4.60802e+06	0.909	0.932	0.865	1.366	0.817	1.142	-0.137648	-0.101598	-0.209228	0.449957	-0.291592	0.191563	0.879156	0.901835	0.768112	0.355632	0.609109	0.795026
Mcf2l	172558	0.909	1.03	0.89	1.379	0.987	1.382	-0.137648	0.0426443	-0.168123	0.463622	-0.018878	0.466758	0.933081	0.998187	0.919099	0.890835	0.973626	0.713634
Setd3	2.26632e+06	0.91	0.999	0.896	0.779	1.249	0.999	-0.136062	-0.00144342	-0.158429	-0.360305	0.320773	-0.00144342	0.887352	0.981181	0.833876	0.548448	0.526537	0.982184
Anp32e	3.99492e+07	0.91	0.98	0.853	1	0.918	0.92	-0.136062	-0.0291463	-0.229382	0	-0.123434	-0.120294	0.539935	0.949139	0.284983	0.923801	0.908834	0.711423
Gnaz	2.02384e+07	0.91	1.011	0.94	1.015	0.874	0.913	-0.136062	0.015783	-0.0892673	0.0214797	-0.194295	-0.131313	0.665283	0.998187	0.892055	0.96452	0.727207	0.708922
Ddx17	3.26634e+07	0.91	0.895	0.86	1.053	0.902	0.909	-0.136062	-0.16004	-0.217591	0.0745054	-0.148801	-0.137648	0.567729	0.453616	0.433775	0.991164	0.84006	0.666571
Nedd4	2.01963e+07	0.91	1.049	0.981	1.07	0.955	1.028	-0.136062	0.0690147	-0.027675	0.0976108	-0.0664274	0.0398403	0.635415	0.923318	0.973644	0.969814	0.97529	0.978509
Eps15l1	3.01514e+07	0.91	1.101	1.003	1.11	0.91	1.041	-0.136062	0.138814	0.00432161	0.15056	-0.136062	0.0579701	0.591551	0.644878	0.996138	0.866538	0.894968	0.946024
Sec13	1.40072e+07	0.91	1.043	0.914	1.157	0.883	0.973	-0.136062	0.0607392	-0.129734	0.210389	-0.179515	-0.0394883	0.639539	0.950821	0.802597	0.79213	0.801384	0.943776
Naa25	852256	0.91	0.972	0.881	1.172	0.925	1.051	-0.136062	-0.0409718	-0.182786	0.228973	-0.112475	0.0717627	0.905504	0.968127	0.853002	0.974593	0.999918	0.994541
Ero1a	1.46999e+06	0.91	1.292	1.157	1.255	0.793	0.959	-0.136062	0.369606	0.210389	0.327687	-0.334607	-0.0603973	0.887426	0.579106	0.89908	0.866538	0.768524	0.934479
KRT5	8.65226e+06	0.96	0.976	0.908	1.144	0.714	0.671	-0.0588937	-0.0350469	-0.139236	0.194087	-0.486004	-0.575615	0.928787	0.957497	0.810362	0.836402	0.0231098	4.34949e-05
Ptcd3	3.47035e+06	0.911	1.425	1.405	0.717	0.979	0.714	-0.134477	0.510962	0.49057	-0.479955	-0.0306192	-0.486004	0.885085	0.200431	0.252067	0.303614	0.998995	0.114897
Caprin1	4.21347e+07	1.167	0.789	0.873	0.995	1.089	1.067	0.222805	-0.341903	-0.195946	-0.00723157	0.123004	0.0935602	0.124065	0.0111787	0.515458	0.919106	0.673974	0.890011
Ttll12	2.40985e+06	0.911	0.93	0.788	0.968	1.099	1.041	-0.134477	-0.104697	-0.343732	-0.046921	0.136191	0.0579701	0.885833	0.901835	0.411571	0.946219	0.875833	0.989044
Psmd6	3.28298e+06	0.911	1.165	1.098	0.968	0.853	0.823	-0.134477	0.22033	0.134878	-0.046921	-0.229382	-0.281036	0.887352	0.863329	0.938514	0.946534	0.886118	0.556813
Rragc	3.36737e+06	0.911	1.094	1.146	0.98	1.288	1.422	-0.134477	0.129613	0.196607	-0.0291463	0.365133	0.507921	0.88828	0.927301	0.874362	0.960526	0.516617	0.185529
Arcn1	6.94652e+06	0.911	0.99	0.915	0.981	0.983	0.955	-0.134477	-0.0144996	-0.128156	-0.027675	-0.0247367	-0.0664274	0.765961	0.977844	0.843871	0.903045	0.993257	0.900336
Arfip2	1.60419e+07	0.912	1.067	1.086	0.924	1.142	1.058	-0.132894	0.0935602	0.119024	-0.114035	0.191563	0.0813396	0.704054	0.898166	0.881848	0.675877	0.572291	0.934369
Copb2	1.08937e+07	0.912	0.988	0.971	1.115	0.876	0.949	-0.132894	-0.0174171	-0.0424568	0.157044	-0.190997	-0.07552	0.72371	0.975037	0.955295	0.895867	0.81627	0.890778
Ssr1	5.77664e+06	0.913	1.075	0.978	0.825	0.992	0.793	-0.131313	0.104337	-0.0320936	-0.277534	-0.011588	-0.334607	0.863605	0.925063	0.963321	0.51256	0.993381	0.202363
Add1	4.98637e+06	0.913	0.953	0.883	0.866	1.029	0.914	-0.131313	-0.0694519	-0.179515	-0.207561	0.041243	-0.129734	0.885085	0.925063	0.802597	0.746249	0.960968	0.818322
Ppa1	2.68024e+07	0.913	1.046	0.982	0.915	1.109	0.995	-0.131313	0.0648829	-0.0262051	-0.128156	0.149259	-0.00723157	0.630041	0.925063	0.966763	0.445652	0.529747	0.986715
Vapb	1.60831e+08	0.913	1.019	0.932	0.947	1.095	1.003	-0.131313	0.0271541	-0.101598	-0.0785637	0.130931	0.00432161	0.144861	0.921831	0.777385	0.645215	0.346347	0.987051
Tmx3	8.68537e+06	0.913	1.103	0.989	1.073	0.997	1.045	-0.131313	0.141433	-0.0159576	0.10165	-0.00433459	0.0635029	0.7884	0.855058	0.973333	0.974391	0.975984	0.977044
Dnajc5	3.16137e+08	0.913	1.103	0.987	1.089	0.889	0.999	-0.131313	0.141433	-0.018878	0.123004	-0.169745	-0.00144342	0.140917	0.17004	0.981662	0.782095	0.422098	0.983612
Crip2	6.35538e+07	0.913	1.091	0.988	1.096	1.016	1.092	-0.131313	0.125651	-0.0174171	0.132248	0.0229004	0.126973	0.514271	0.574817	0.988634	0.866538	0.90695	0.784493
Plin3	3.46561e+06	0.913	1.178	1.051	1.118	1.078	1.029	-0.131313	0.23634	0.0717627	0.16092	0.108357	0.041243	0.892151	0.800124	0.973644	0.932017	0.886966	0.999853
Puf60	3.66816e+06	0.914	0.827	0.95	0.846	1.303	1.124	-0.129734	-0.274041	-0.0740006	-0.24127	0.381837	0.168642	0.887352	0.55104	0.95166	0.750431	0.40173	0.922219
Prickle2	244723	0.914	0.989	0.898	0.913	0.919	0.849	-0.129734	-0.0159576	-0.155213	-0.131313	-0.121863	-0.236164	0.919207	0.977198	0.905355	0.8927	0.996944	0.785252
Smap1	5.54897e+07	0.914	1.009	0.947	1.033	1.018	1.054	-0.129734	0.0129262	-0.0785637	0.0468403	0.0257376	0.0758749	0.521289	0.988767	0.878768	0.999663	0.915555	0.90268
Nampt	8.60725e+06	0.914	1.022	0.895	1.053	0.967	1.033	-0.129734	0.0313952	-0.16004	0.0745054	-0.0484122	0.0468403	0.805197	0.989292	0.774583	0.99082	0.990694	0.983612
Kctd12	5.1221e+07	0.914	1.028	0.961	1.059	0.971	0.996	-0.129734	0.0398403	-0.0573917	0.0827026	-0.0424568	-0.00578235	0.527152	0.947946	0.919099	0.930527	0.983089	0.986715
Pank4	36205.7	0.914	0.678	0.642	1.408	0.463	0.767	-0.129734	-0.560643	-0.639355	0.493647	-1.11092	-0.382702	0.961212	0.402155	0.555928	0.869309	0.152672	0.686852
Gnpda2	4.70556e+06	1.099	1.161	1.281	2.033	0.519	1.068	0.136191	0.215368	0.35727	1.02361	-0.946194	0.0949116	0.847928	0.805201	0.419106	0.000148991	1.45843e-05	0.948228
U2af1	3.66898e+06	0.915	1.219	1.117	0.995	0.959	0.879	-0.128156	0.285698	0.159629	-0.00723157	-0.0603973	-0.186065	0.887286	0.678258	0.910529	0.969005	0.973626	0.739814
Psd	1.45396e+07	1.289	0.623	0.787	0.984	0.975	0.956	0.366252	-0.682696	-0.345564	-0.0232698	-0.0365259	-0.0649175	0.0798115	2.38421e-06	0.0784754	0.893141	0.995522	0.914746
Maoa	4.98353e+07	0.915	0.994	0.933	1.051	0.971	1.047	-0.128156	-0.00868224	-0.100051	0.0717627	-0.0424568	0.0662614	0.539155	0.987121	0.840755	0.975399	0.995117	0.929375
Tmed7	1.41175e+07	0.915	1.045	0.958	1.054	0.984	1.054	-0.128156	0.0635029	-0.0619024	0.0758749	-0.0232698	0.0758749	0.681851	0.95354	0.933901	0.9931	0.99456	0.9469
Loxhd1	4.39284e+07	1.106	1.124	1.264	1.62	0.521	0.838	0.145351	0.168642	0.337996	0.695994	-0.940645	-0.254978	0.474475	0.445349	0.104826	2.31717e-07	2.91314e-12	0.116489
Rpl37a	7.00129e+06	0.916	0.937	0.855	0.931	1.07	0.996	-0.12658	-0.093879	-0.226004	-0.103147	0.0976108	-0.00578235	0.864095	0.895657	0.626747	0.82254	0.867366	0.983544
Bsg	1.46804e+08	0.916	1.089	1.005	0.979	0.947	0.926	-0.12658	0.123004	0.0071955	-0.0306192	-0.0785637	-0.110916	0.223148	0.352001	0.985483	0.866538	0.899904	0.546206
Homer3	1.05298e+06	0.765	2.505	1.939	1.787	0.527	1.037	-0.386468	1.32481	0.955313	0.83754	-0.924125	0.0524159	0.568332	1.24809e-05	0.0222782	0.0207293	0.000587456	0.986592
Rnmt	1.08069e+07	0.916	1.044	0.929	0.994	0.92	0.93	-0.12658	0.0621217	-0.106249	-0.00868224	-0.120294	-0.104697	0.704054	0.95354	0.867495	0.945585	0.942636	0.836089
Sec22b	3.46596e+07	0.916	1.032	0.994	1.015	1.141	1.132	-0.12658	0.045443	-0.00868224	0.0214797	0.190299	0.178874	0.633786	0.959806	0.981881	0.961105	0.442298	0.593899
Mapre2	8.91637e+07	0.916	1.061	0.988	1.044	0.964	0.978	-0.12658	0.0854247	-0.0174171	0.0621217	-0.0528949	-0.0320936	0.357378	0.738997	0.989372	0.975399	0.973626	0.95009
Kpna4	4.06251e+06	0.916	1.104	1.06	1.208	0.882	1.111	-0.12658	0.14274	0.0840643	0.27262	-0.181149	0.151859	0.888316	0.904584	0.95288	0.827225	0.861426	0.890011
	4.61081e+07	1.386	0.792	0.967	1.173	0.872	1.062	0.470927	-0.336428	-0.0484122	0.230203	-0.1976	0.0867838	2.66943e-06	0.00201997	0.936624	0.422077	0.66982	0.896227
Btf3l4	2.73032e+07	0.917	1.176	1.027	0.967	1.057	1.024	-0.125006	0.233888	0.0384362	-0.0484122	0.0799754	0.0342157	0.670887	0.214482	0.973644	0.864543	0.843752	0.986715
Twf1	3.28521e+07	0.917	1.12	0.984	1.012	1.009	0.98	-0.125006	0.163499	-0.0232698	0.0172093	0.0129262	-0.0291463	0.635415	0.505929	0.970806	0.963385	0.935638	0.956586
Enah	3.97503e+06	0.917	0.932	0.822	1.06	1.098	1.177	-0.125006	-0.101598	-0.28279	0.0840643	0.134878	0.235114	0.88828	0.888085	0.55004	0.987083	0.815113	0.653915
Ubxn4	246117	0.917	0.723	0.979	1.106	0.887	1.116	-0.125006	-0.467932	-0.0306192	0.145351	-0.172994	0.158337	0.94135	0.558799	0.961997	0.994453	0.958874	0.953045
Atrn	418094	0.917	1.299	1.299	1.222	1.085	1.136	-0.125006	0.377401	0.377401	0.289244	0.117695	0.183963	0.930729	0.757836	0.816353	0.960384	0.908834	0.934369
Eno3	3.58938e+07	1.264	0.795	1.05	1.089	0.926	1.133	0.337996	-0.330973	0.0703893	0.123004	-0.110916	0.180148	0.00445387	0.0189928	0.938494	0.93052	0.937856	0.605775
Atat1	2.39288e+06	0.957	0.985	0.904	1.094	0.67	0.69	-0.0634092	-0.0218044	-0.145605	0.129613	-0.577767	-0.535332	0.961212	0.977338	0.843871	0.990615	0.235006	0.0903934
Aox1	175364	0.917	1.3	1.231	1.546	1.108	1.73	-0.125006	0.378512	0.299831	0.62854	0.147958	0.790772	0.940511	0.852481	0.919639	0.79213	0.915555	0.230658
Clint1	1.97978e+07	0.939	1.075	0.995	0.953	0.704	0.69	-0.0908029	0.104337	-0.00723157	-0.0694519	-0.506353	-0.535332	0.855108	0.892941	0.989372	0.819428	0.0394798	0.000460378
Omg	1.44328e+08	0.918	1.007	0.967	1.022	1.023	1.056	-0.123434	0.0100637	-0.0484122	0.0313952	0.0328061	0.0786098	0.249444	0.974436	0.940855	0.993885	0.888323	0.864002
Nrxn1	5.83515e+07	0.918	0.942	0.868	1.026	0.995	0.975	-0.123434	-0.086201	-0.204233	0.0370307	-0.00723157	-0.0365259	0.556437	0.798115	0.354929	0.994798	0.973626	0.946024
Ap3s1	8.95753e+06	0.918	0.996	0.95	1.099	0.862	0.875	-0.123434	-0.00578235	-0.0740006	0.136191	-0.21424	-0.192645	0.831547	0.988767	0.923356	0.936607	0.746581	0.561834
Mag	2.19774e+07	0.918	1.169	1.056	1.157	0.895	1.011	-0.123434	0.225275	0.0786098	0.210389	-0.16004	0.015783	0.704054	0.304665	0.929657	0.793315	0.864802	0.999548
Gcn1	5.74347e+06	0.918	1.066	0.975	1.179	0.85	1.076	-0.123434	0.0922074	-0.0365259	0.237564	-0.234465	0.105678	0.879652	0.939723	0.959937	0.801769	0.72164	0.934479
Smarca4	2.97398e+06	0.918	1.233	1.281	1.249	0.824	1.025	-0.123434	0.302173	0.35727	0.320773	-0.279284	0.0356239	0.89551	0.7061	0.634268	0.777832	0.739542	0.994541
Coq9	8.12359e+06	0.918	1.275	1.224	1.427	0.984	1.34	-0.123434	0.350497	0.291604	0.512985	-0.0232698	0.422233	0.875497	0.327121	0.569158	0.363146	0.997978	0.257195
Acy1	1.40279e+06	0.804	1.273	0.871	1.678	0.536	0.972	-0.314733	0.348232	-0.199255	0.746743	-0.899695	-0.0409718	0.638638	0.621208	0.794714	0.237893	0.0392128	0.958319
Lamp2	3.71513e+06	0.919	1.031	0.93	0.961	0.862	0.834	-0.121863	0.0440443	-0.104697	-0.0573917	-0.21424	-0.261881	0.892151	0.989292	0.920977	0.941292	0.831974	0.539671
Elavl3	3.91419e+06	0.919	0.99	0.887	1.035	0.85	0.867	-0.121863	-0.0144996	-0.172994	0.0496308	-0.234465	-0.205896	0.89008	0.981948	0.840235	0.994798	0.768524	0.637574
Lgals1	3.32297e+07	0.919	1	0.893	1.043	0.908	0.887	-0.121863	0	-0.163268	0.0607392	-0.139236	-0.172994	0.666653	0.998187	0.641179	0.987083	0.85935	0.43401
Sptb	2.44064e+07	0.919	1.101	1.044	1.054	0.926	1.007	-0.121863	0.138814	0.0621217	0.0758749	-0.110916	0.0100637	0.697975	0.754559	0.949307	0.987083	0.940902	0.999853
Psmd11	1.37329e+07	0.919	1.147	1.075	1.209	1.062	1.221	-0.121863	0.197865	0.104337	0.273814	0.0867838	0.288063	0.729447	0.570822	0.915769	0.703604	0.886222	0.441436
Ranbp1	6.47765e+07	0.92	0.997	0.929	0.86	1.153	0.947	-0.120294	-0.00433459	-0.106249	-0.217591	0.205393	-0.0785637	0.591551	0.994722	0.825044	0.132961	0.195782	0.879906
Dlgap2	1.32596e+07	0.92	1.038	0.954	0.992	0.886	0.89	-0.120294	0.0538064	-0.0679388	-0.011588	-0.174621	-0.168123	0.709144	0.958655	0.923434	0.935215	0.847595	0.592315
Slc39a10	5.85117e+06	0.92	1.006	0.948	1.063	1.039	1.108	-0.120294	0.00863031	-0.077041	0.0881416	0.0551957	0.147958	0.885085	0.989306	0.933901	0.991268	0.958874	0.906406
Tpd52l2	2.96432e+07	0.92	1.134	1.125	1.155	0.933	1.187	-0.120294	0.181421	0.169925	0.207893	-0.100051	0.24732	0.690588	0.487175	0.699028	0.700802	0.952109	0.302831
Atp1a1	2.201e+09	0.921	1.005	0.922	0.948	1.021	0.97	-0.118727	0.0071955	-0.117161	-0.077041	0.0299829	-0.0439433	0.215783	0.97273	0.702743	0.653767	0.904099	0.890778
Lmnb1	4.49101e+07	0.921	1.087	0.989	1.032	0.995	1.054	-0.118727	0.120352	-0.0159576	0.045443	-0.00723157	0.0758749	0.60015	0.661202	0.973644	0.994798	0.953066	0.921851
Asns	6.62869e+06	0.921	1.043	0.969	1.059	0.937	0.956	-0.118727	0.0607392	-0.0454314	0.0827026	-0.093879	-0.0649175	0.885085	0.975037	0.959937	0.9931	0.94865	0.92228
Arrb1	2.59267e+07	0.921	0.943	0.906	1.061	0.837	0.87	-0.118727	-0.0846703	-0.142417	0.0854247	-0.2567	-0.200913	0.696732	0.847606	0.712327	0.987083	0.521154	0.402301
Cyld	4.77999e+06	0.921	1.165	1.3	1.12	1.048	1.114	-0.118727	0.22033	0.378512	0.163499	0.0676387	0.155749	0.892151	0.701137	0.345417	0.960526	0.944926	0.920208
Uba2	8.90514e+06	0.921	1.045	0.986	1.185	0.866	1.026	-0.118727	0.0635029	-0.0203404	0.244887	-0.207561	0.0370307	0.832233	0.963898	0.971707	0.89068	0.861046	0.999853
Acot11	5.74636e+06	0.921	0.979	0.941	1.211	0.937	1.105	-0.118727	-0.0306192	-0.0877334	0.276199	-0.093879	0.144046	0.892151	0.963813	0.924727	0.704296	0.954559	0.890011
Rars1	3.07233e+07	0.888	0.858	0.795	0.932	0.988	0.933	-0.171368	-0.22095	-0.330973	-0.101598	-0.0174171	-0.100051	0.383432	0.182383	0.0902157	0.62797	0.97111	0.83065
Camkv	4.83565e+08	0.922	1.036	0.941	0.966	0.966	0.958	-0.117161	0.051024	-0.0877334	-0.0499049	-0.0499049	-0.0619024	0.226871	0.82983	0.840918	0.79114	0.960968	0.83868
Rtcb	6.55938e+07	0.922	1.015	0.942	1.018	1.016	1.036	-0.117161	0.0214797	-0.086201	0.0257376	0.0229004	0.051024	0.591551	0.974463	0.877586	0.987083	0.933686	0.956034
C1qc	4.57496e+06	0.922	1.001	0.975	1.071	0.928	1.065	-0.117161	0.00144197	-0.0365259	0.0989585	-0.107803	0.0908534	0.894717	0.989292	0.973644	0.974593	0.946305	0.931364
Nlgn2	2.42019e+07	0.922	1.056	0.965	1.1	1.044	1.12	-0.117161	0.0786098	-0.0513992	0.137504	0.0621217	0.163499	0.723714	0.901835	0.933901	0.896907	0.86195	0.681345
Cacna2d3	1.22178e+07	0.922	0.99	0.965	1.12	0.831	0.969	-0.117161	-0.0144996	-0.0513992	0.163499	-0.26708	-0.0454314	0.768817	0.974827	0.943626	0.887666	0.557222	0.934369
Nae1	1.44767e+07	0.923	1.076	0.954	0.947	1.025	0.936	-0.115597	0.105678	-0.0679388	-0.0785637	0.0356239	-0.0954196	0.718052	0.89278	0.92401	0.807934	0.944926	0.840078
Ppp1r12a	6.20137e+06	0.923	0.961	0.884	0.998	0.952	0.908	-0.115597	-0.0573917	-0.177882	-0.00288828	-0.0709665	-0.139236	0.863605	0.927112	0.73254	0.957138	0.975108	0.716895
Gnl1	3.59675e+07	0.923	1.055	1.023	1	0.918	0.853	-0.115597	0.077243	0.0328061	0	-0.123434	-0.229382	0.656223	0.87241	0.976973	0.923563	0.897523	0.262792
Vps16	2.28237e+06	1.44	1.426	2.073	1.865	0.537	1.031	0.526069	0.511974	1.05172	0.899176	-0.897006	0.0440443	0.0969128	0.0592067	4.081e-06	0.0397842	0.0431675	0.99644
Frrs1l	1.29133e+07	0.923	1.145	1.09	1.004	1.126	1.133	-0.115597	0.195348	0.124328	0.00575927	0.171207	0.180148	0.773182	0.594049	0.894068	0.946874	0.673974	0.691388
Psmc6	2.65679e+08	0.923	1.025	0.954	1.058	0.927	0.981	-0.115597	0.0356239	-0.0679388	0.0813396	-0.109359	-0.027675	0.234651	0.898166	0.894068	0.919106	0.768524	0.934479
Pgap1	1.76217e+06	0.923	1.025	1.109	1.173	0.847	0.893	-0.115597	0.0356239	0.149259	0.230203	-0.239566	-0.163268	0.914941	0.998109	0.950111	0.974391	0.952613	0.876126
Hsd17b8	1.63264e+07	1.095	0.805	0.846	1.175	0.916	1.026	0.130931	-0.312939	-0.24127	0.232661	-0.12658	0.0370307	0.704054	0.0947814	0.434961	0.667858	0.915749	0.981748
Gfer	2.92612e+06	0.924	0.883	0.76	0.915	1.144	1.036	-0.114035	-0.179515	-0.395929	-0.128156	0.194087	0.051024	0.905504	0.7693	0.328668	0.87692	0.785022	0.986715
Anks1b	268914	0.924	1.059	0.985	0.918	0.924	0.828	-0.114035	0.0827026	-0.0218044	-0.123434	-0.114035	-0.272297	0.928796	0.996329	0.966474	0.90821	0.995712	0.777071
Pex5l	8.00066e+06	0.924	1.083	0.976	0.918	1.05	0.976	-0.114035	0.115033	-0.0350469	-0.123434	0.0703893	-0.0350469	0.855108	0.901835	0.959937	0.741652	0.880511	0.951961
Plxna1	1.2878e+07	0.924	1.117	1.001	0.983	0.984	0.983	-0.114035	0.159629	0.00144197	-0.0247367	-0.0232698	-0.0247367	0.788535	0.731224	0.992578	0.87739	0.973849	0.97068
Rpl34	6.6074e+07	0.924	1.029	0.942	0.987	1.049	1.042	-0.114035	0.041243	-0.086201	-0.018878	0.0690147	0.0593553	0.628662	0.939723	0.877627	0.906143	0.790785	0.947433
Ankfy1	384040	0.924	1.254	1.221	1.065	1.394	1.233	-0.114035	0.326537	0.288063	0.0908534	0.479231	0.302173	0.939725	0.794537	0.877627	0.992384	0.451221	0.858817
Tmed10	4.13391e+07	0.924	1.114	1.044	1.07	1.035	1.095	-0.114035	0.155749	0.0621217	0.0976108	0.0496308	0.130931	0.657783	0.521031	0.95288	0.960526	0.845966	0.761748
Rras2	2.22865e+07	0.924	1.079	1.038	1.074	0.996	1.038	-0.114035	0.109695	0.0538064	0.102994	-0.00578235	0.0538064	0.723064	0.845952	0.959937	0.953254	0.960763	0.95009
LOC110307790	3.18723e+07	0.924	0.886	0.809	1.075	0.978	1.073	-0.114035	-0.174621	-0.305788	0.104337	-0.0320936	0.10165	0.704054	0.388419	0.139993	0.940711	0.973674	0.865815
Ybx1	1.35354e+06	0.924	1.124	1.069	1.104	0.895	0.97	-0.114035	0.168642	0.0962619	0.14274	-0.16004	-0.0439433	0.911411	0.901835	0.968695	0.985199	0.956685	0.95009
Arf3	5.08377e+08	1.177	0.811	0.952	1.006	0.918	0.953	0.235114	-0.302226	-0.0709665	0.00863031	-0.123434	-0.0694519	0.00179257	0.000210275	0.885573	0.963385	0.687737	0.802386
Hmox2	3.13551e+07	0.925	1.077	1.015	0.844	1.076	0.844	-0.112475	0.107018	0.0214797	-0.244685	0.105678	-0.244685	0.696732	0.760454	0.989372	0.13791	0.740753	0.243571
Pld3	4.77298e+07	0.925	0.913	0.841	0.918	1.024	0.918	-0.112475	-0.131313	-0.249822	-0.123434	0.0342157	-0.123434	0.635415	0.540935	0.271269	0.512801	0.886966	0.732884
Mal2	6.47244e+07	0.925	1.006	0.947	0.972	0.991	0.945	-0.112475	0.00863031	-0.0785637	-0.0409718	-0.013043	-0.0816138	0.633786	0.997548	0.890607	0.855466	0.973626	0.854132
Myh9	6.39439e+07	0.925	0.975	0.92	1	0.967	0.974	-0.112475	-0.0365259	-0.120294	0	-0.0484122	-0.0380063	0.635863	0.938799	0.77136	0.942287	0.973626	0.933316
Tbc1d24	2.12935e+07	1.145	0.815	0.891	1.089	0.86	1.021	0.195348	-0.295128	-0.166503	0.123004	-0.217591	0.0299829	0.289799	0.041031	0.634268	0.919329	0.591949	0.983612
Rptor	2.47961e+06	0.963	1.268	1.249	2.115	0.549	1.222	-0.0543923	0.342555	0.320773	1.08066	-0.865122	0.289244	0.961465	0.588361	0.641179	0.00459409	0.015565	0.668292
Ube2v2	1.75442e+07	0.927	0.971	0.932	0.825	1.155	1.006	-0.109359	-0.0424568	-0.101598	-0.277534	0.207893	0.00863031	0.798441	0.943361	0.877627	0.150896	0.515807	0.986715
Rps29	1.42822e+07	0.927	0.88	0.816	0.828	1.294	1.094	-0.109359	-0.184425	-0.293359	-0.272297	0.371838	0.129613	0.76658	0.508944	0.282417	0.194241	0.132924	0.871453
Slc6a7	4.20314e+06	0.976	1.572	1.355	1.275	0.551	0.886	-0.0350469	0.652601	0.438293	0.350497	-0.859876	-0.174621	0.985762	0.0340249	0.363666	0.605476	0.000109129	0.593657
Kif20b	1.06778e+07	28.798	0.366	13.312	1.794	0.554	0.841	4.8479	-1.45008	3.73466	0.84318	-0.852042	-0.249822	2.80253e-16	1.07037e-10	2.92648e-16	0.000842447	0.000117033	0.251146
Ddx5	1.68913e+08	0.927	0.985	0.922	1.008	0.985	0.973	-0.109359	-0.0218044	-0.117161	0.0114956	-0.0218044	-0.0394883	0.297103	0.978579	0.682151	0.96727	0.998443	0.902445
Stam	1.28287e+07	0.927	1.069	1.099	1.008	0.986	0.964	-0.109359	0.0962619	0.136191	0.0114956	-0.0203404	-0.0528949	0.799037	0.901835	0.88281	0.966962	0.978138	0.929375
Serpinb6	3.70158e+07	0.927	1.079	0.999	1.017	1.006	1.019	-0.109359	0.109695	-0.00144342	0.0243197	0.00863031	0.0271541	0.704054	0.746215	0.990455	0.974391	0.931082	0.986715
Kcna1	4.31535e+07	0.927	1.054	0.969	1.019	0.931	0.93	-0.109359	0.0758749	-0.0454314	0.0271541	-0.103147	-0.104697	0.656223	0.881979	0.948741	0.974593	0.944926	0.789834
Ppfia2	1.93712e+08	0.927	1.075	0.983	1.044	0.981	1.012	-0.109359	0.104337	-0.0247367	0.0621217	-0.027675	0.0172093	0.27835	0.413626	0.973644	0.963385	0.991826	0.999548
Rps15a	6.55709e+07	0.927	0.996	0.945	1.048	0.991	1.028	-0.109359	-0.00578235	-0.0816138	0.0676387	-0.013043	0.0398403	0.660308	0.989292	0.88157	0.974593	0.973626	0.970386
Get4	8.9434e+06	0.927	1.169	1.079	1.081	0.964	1.073	-0.109359	0.225275	0.109695	0.112367	-0.0528949	0.10165	0.84743	0.618494	0.930634	0.963385	0.982004	0.931364
Exoc1	5.89028e+06	0.927	1.093	1.009	1.149	0.809	0.927	-0.109359	0.128293	0.0129262	0.200379	-0.305788	-0.109359	0.894717	0.901835	0.992578	0.866538	0.496467	0.836089
Fau	2.01164e+07	0.927	1.184	1.105	1.16	0.832	0.943	-0.109359	0.243669	0.144046	0.214125	-0.265345	-0.0846703	0.767394	0.304665	0.798695	0.764351	0.492387	0.871453
Aldh18a1	5.23752e+06	0.927	0.997	0.96	1.253	0.761	0.947	-0.109359	-0.00433459	-0.0588937	0.325386	-0.394032	-0.0785637	0.896426	0.985424	0.959937	0.738155	0.369674	0.893649
Atp6v0c	2.38347e+08	1.132	1.076	1.152	1.423	0.567	0.969	0.178874	0.105678	0.204141	0.508936	-0.818579	-0.0454314	0.0415121	0.405611	0.191902	7.30977e-07	2.21282e-16	0.890011
Rae1	4.39621e+06	0.928	0.893	0.81	0.787	0.988	0.777	-0.107803	-0.163268	-0.304006	-0.345564	-0.0174171	-0.364013	0.906579	0.8132	0.551083	0.275079	0.992455	0.104596
Rab31	1.1548e+07	0.928	1.192	1.066	0.801	1.16	0.946	-0.107803	0.253384	0.0922074	-0.320126	0.214125	-0.0800879	0.805197	0.380942	0.942832	0.143515	0.492387	0.890011
Rps3a	2.1234e+08	0.928	0.963	0.886	0.915	1.086	1	-0.107803	-0.0543923	-0.174621	-0.128156	0.119024	0	0.284193	0.896839	0.38964	0.330204	0.444511	0.985307
Naa15	1.21359e+07	0.928	0.973	0.915	0.928	0.94	0.929	-0.107803	-0.0394883	-0.128156	-0.107803	-0.0892673	-0.106249	0.781644	0.943361	0.820468	0.776597	0.966226	0.837299
Naca	5.2116e+07	0.928	0.957	0.918	0.956	1.118	1.024	-0.107803	-0.0634092	-0.123434	-0.0649175	0.16092	0.0342157	0.657783	0.892278	0.721035	0.784461	0.421096	0.982367
Vps53	1.05711e+07	0.928	0.99	0.953	1.255	0.865	1.02	-0.107803	-0.0144996	-0.0694519	0.327687	-0.209228	0.0285692	0.81897	0.977338	0.922975	0.548267	0.774642	0.999853
Crnkl1	1.88903e+08	0.782	1.351	1.11	1.736	0.569	1.012	-0.354759	0.434028	0.15056	0.795767	-0.813499	0.0172093	1.65977e-08	1.26628e-09	0.462353	2.67297e-16	2.21282e-16	0.999548
Cpm	4.70116e+06	0.986	1.083	1.068	1.043	0.684	0.693	-0.0203404	0.115033	0.0949116	0.0607392	-0.547932	-0.529073	0.991684	0.93468	0.943445	0.999873	0.05689	0.0178684
Jpt1	6.48812e+06	0.929	0.988	0.933	0.934	1.238	1.163	-0.106249	-0.0174171	-0.100051	-0.0985055	0.308011	0.217851	0.866627	0.974068	0.881848	0.79213	0.346347	0.688011
Tceal3	1.03317e+08	0.929	0.993	0.939	0.935	1.045	0.941	-0.106249	-0.0101344	-0.0908029	-0.0969617	0.0635029	-0.0877334	0.461877	0.998109	0.852403	0.585805	0.774642	0.778512
Rps9	1.49741e+08	0.929	1.055	0.971	1.009	0.983	0.995	-0.106249	0.077243	-0.0424568	0.0129262	-0.0247367	-0.00723157	0.362443	0.701137	0.953296	0.973449	0.999918	0.982367
Dlgap1	1.69892e+07	0.929	1.021	0.96	1.012	1.063	1.005	-0.106249	0.0299829	-0.0588937	0.0172093	0.0881416	0.0071955	0.799037	0.985698	0.939636	0.960526	0.708132	0.999853
Myef2	5.77572e+07	0.929	0.999	0.932	1.025	0.961	0.982	-0.106249	-0.00144342	-0.101598	0.0356239	-0.0573917	-0.0262051	0.662432	0.998187	0.839632	0.991683	0.973626	0.960533
Emb	7.04312e+06	1.004	1.131	1.075	0.751	1.054	0.703	0.00575927	0.177599	0.104337	-0.413115	0.0758749	-0.508403	0.98609	0.813233	0.930634	0.093023	0.90014	0.00854247
Mfn2	2.11814e+07	0.929	1.111	1.036	1.122	1.056	1.081	-0.106249	0.151859	0.051024	0.166073	0.0786098	0.112367	0.7884	0.717242	0.960646	0.862197	0.819373	0.882512
Hnrnpd	831098	0.93	0.837	0.808	0.896	1.213	1.063	-0.104697	-0.2567	-0.307573	-0.158429	0.27858	0.0881416	0.936187	0.7298	0.655095	0.843063	0.722798	0.986715
Coro1b	9.27135e+07	0.93	0.976	0.897	0.953	1.014	1.002	-0.104697	-0.0350469	-0.15682	-0.0694519	0.0200577	0.00288251	0.559713	0.943339	0.594221	0.746249	0.924845	0.988261
Rph3a	1.64759e+08	0.93	1.009	0.936	0.973	0.955	0.95	-0.104697	0.0129262	-0.0954196	-0.0394883	-0.0664274	-0.0740006	0.31471	0.9605	0.803539	0.830913	0.933686	0.780499
Clip1	1.57716e+07	0.93	0.981	0.889	1.01	1.08	1.099	-0.104697	-0.027675	-0.169745	0.0143553	0.111031	0.136191	0.768697	0.963813	0.671876	0.960526	0.81432	0.838702
Hnmt	1.06013e+06	0.93	0.992	0.975	1.021	0.962	0.921	-0.104697	-0.011588	-0.0365259	0.0299829	-0.0558912	-0.118727	0.94135	0.983954	0.966763	0.965941	0.995348	0.893649
Mybbp1a	1.34562e+06	0.93	1.025	0.97	1.061	0.988	1.132	-0.104697	0.0356239	-0.0439433	0.0854247	-0.0174171	0.178874	0.92184	0.998022	0.950594	0.991683	0.972921	0.946992
Spg7	765389	0.93	0.953	0.997	1.664	0.935	1.517	-0.104697	-0.0694519	-0.00433459	0.734655	-0.0969617	0.601221	0.939912	0.95354	0.976228	0.403053	0.996944	0.23204
Atad3	3.48317e+07	0.931	1.135	0.98	0.877	1.12	1.038	-0.103147	0.182692	-0.0291463	-0.189351	0.163499	0.0538064	0.730861	0.39852	0.966474	0.234306	0.35875	0.95009
Pcdh1	7.77251e+07	0.931	1.046	0.979	0.911	1.026	0.94	-0.103147	0.0648829	-0.0306192	-0.134477	0.0370307	-0.0892673	0.586511	0.878471	0.973644	0.309819	0.870942	0.784382
Gprin1	2.62867e+08	0.931	0.991	0.937	0.933	0.999	0.928	-0.103147	-0.013043	-0.093879	-0.100051	-0.00144342	-0.107803	0.325683	0.99659	0.817279	0.508915	0.97111	0.566961
	1.92135e+08	0.931	1.019	0.978	0.958	0.993	0.945	-0.103147	0.0271541	-0.0320936	-0.0619024	-0.0101344	-0.0816138	0.317835	0.921831	0.966763	0.738935	0.97529	0.733767
Gpr158	6.49321e+07	0.931	1.001	0.914	0.972	0.969	0.952	-0.103147	0.00144197	-0.129734	-0.0409718	-0.0454314	-0.0709665	0.677401	0.999791	0.718119	0.841662	0.997978	0.893649
Rpl22	5.08471e+07	0.931	1.09	0.994	1.011	0.987	0.988	-0.103147	0.124328	-0.00868224	0.015783	-0.018878	-0.0174171	0.681191	0.570822	0.984375	0.974391	0.973626	0.976648
Rpl30	5.93975e+07	0.931	1.059	0.985	1.053	1.036	1.082	-0.103147	0.0827026	-0.0218044	0.0745054	0.051024	0.1137	0.677401	0.841878	0.984824	0.974593	0.848181	0.825666
Prune1	1.39703e+07	0.931	1.043	0.958	1.114	1.004	1.071	-0.103147	0.0607392	-0.0619024	0.155749	0.00575927	0.0989585	0.790786	0.951297	0.933901	0.8927	0.964994	0.921343
	1.02327e+07	0.931	1.181	1.128	1.128	0.9	1.042	-0.103147	0.240009	0.173767	0.173767	-0.152003	0.0593553	0.805197	0.413697	0.820085	0.866538	0.900091	0.972461
Gbf1	4.32364e+06	0.931	0.962	0.952	1.499	0.733	1.026	-0.103147	-0.0558912	-0.0709665	0.584	-0.448115	0.0370307	0.90964	0.949714	0.955295	0.364793	0.394947	0.999853
Lrp1	8.15836e+07	0.932	1.008	0.944	0.93	1.066	1.015	-0.101598	0.0114956	-0.0831412	-0.104697	0.0922074	0.0214797	0.612293	0.988849	0.877627	0.578676	0.689616	0.986715
Rasgrf2	1.62107e+07	0.932	1.158	1.104	0.935	1.096	1.089	-0.101598	0.211635	0.14274	-0.0969617	0.132248	0.123004	0.780685	0.474645	0.843871	0.82935	0.787581	0.911867
Gpm6b	3.45032e+08	0.932	0.993	0.944	0.935	1.006	0.927	-0.101598	-0.0101344	-0.0831412	-0.0969617	0.00863031	-0.109359	0.336538	0.998187	0.851013	0.527276	0.95324	0.561826
Ntrk2	6.56205e+07	0.932	0.996	0.955	0.975	0.94	0.925	-0.101598	-0.00578235	-0.0664274	-0.0365259	-0.0892673	-0.112475	0.677401	0.989292	0.919856	0.841985	0.956685	0.719629
	1.4248e+07	0.932	1.008	0.948	1.027	1.004	0.994	-0.101598	0.0114956	-0.077041	0.0384362	0.00575927	-0.00868224	0.800805	0.998206	0.909355	0.987083	0.961301	0.981711
Shmt2	5.21428e+06	0.932	1.046	0.984	1.051	0.906	0.936	-0.101598	0.0648829	-0.0232698	0.0717627	-0.142417	-0.0954196	0.909639	0.975037	0.980368	0.999148	0.940902	0.89
Cpne3	1.86116e+06	0.933	0.975	0.898	0.93	0.817	0.852	-0.100051	-0.0365259	-0.155213	-0.104697	-0.291592	-0.231075	0.917581	0.973071	0.843871	0.876177	0.908826	0.746635
Pclo	2.13815e+08	0.933	0.995	0.939	0.951	1.001	0.963	-0.100051	-0.00723157	-0.0908029	-0.0724828	0.00144197	-0.0543923	0.350304	0.998945	0.8291	0.687574	0.964994	0.865815
Rpl4	1.54919e+08	0.933	1.023	0.943	0.952	1.034	0.974	-0.100051	0.0328061	-0.0846703	-0.0709665	0.0482362	-0.0380063	0.399482	0.920053	0.851013	0.697706	0.835156	0.906433
Erc2	1.09228e+08	0.933	1	0.94	0.961	0.956	0.933	-0.100051	0	-0.0892673	-0.0573917	-0.0649175	-0.100051	0.541216	0.998961	0.868616	0.79213	0.952109	0.713634
Prmt5	8.03738e+06	0.933	0.985	0.899	1.049	0.859	0.895	-0.100051	-0.0218044	-0.153607	0.0690147	-0.21927	-0.16004	0.894717	0.97273	0.794714	0.994798	0.739542	0.668455
Hnrnpr	1.1021e+08	0.933	0.94	0.872	1.059	1.078	1.146	-0.100051	-0.0892673	-0.1976	0.0827026	0.108357	0.196607	0.541216	0.723863	0.373662	0.935215	0.561468	0.231638
Psmb1	8.40671e+07	0.933	1.086	1.036	1.083	0.936	1.005	-0.100051	0.119024	0.051024	0.115033	-0.0954196	0.0071955	0.612293	0.570822	0.928757	0.868961	0.903703	0.999548
Psmd7	3.34433e+07	0.933	1.004	0.944	1.154	0.906	1.058	-0.100051	0.00575927	-0.0831412	0.206643	-0.142417	0.0813396	0.747935	0.998945	0.883269	0.678136	0.855523	0.901509
Eif3b	1.72586e+07	0.934	0.949	0.94	0.825	1.144	0.916	-0.0985055	-0.07552	-0.0892673	-0.277534	0.194087	-0.12658	0.7884	0.89745	0.892055	0.146981	0.475	0.71606
Snx6	4.19197e+06	0.934	0.971	0.926	0.913	1.144	1.088	-0.0985055	-0.0424568	-0.110916	-0.131313	0.194087	0.121679	0.924713	0.954343	0.916192	0.869039	0.789416	0.95009
Calu	9.31205e+06	0.934	0.973	0.9	0.947	0.958	0.9	-0.0985055	-0.0394883	-0.152003	-0.0785637	-0.0619024	-0.152003	0.855108	0.95354	0.777622	0.869131	0.973626	0.708922
Slc6a11	2.83328e+08	0.934	0.964	0.911	0.977	1.005	0.962	-0.0985055	-0.0528949	-0.134477	-0.0335695	0.0071955	-0.0558912	0.37625	0.901835	0.634268	0.853278	0.958874	0.862446
Cyth2	1.15224e+07	0.934	1.084	0.976	0.981	0.989	1.009	-0.0985055	0.116365	-0.0350469	-0.027675	-0.0159576	0.0129262	0.847928	0.880868	0.959937	0.919106	0.973626	0.999548
Trap1	1.67998e+07	0.934	1.038	1.011	0.993	0.963	0.94	-0.0985055	0.0538064	0.015783	-0.0101344	-0.0543923	-0.0892673	0.788535	0.959464	0.996138	0.922509	0.978878	0.857461
Rtn1	7.32984e+08	0.934	1.006	0.96	0.996	0.994	1.001	-0.0985055	0.00863031	-0.0588937	-0.00578235	-0.00868224	0.00144197	0.370706	0.968931	0.919639	0.93052	0.973626	0.986715
Agpat3	1.09635e+07	0.934	1.176	1.11	1.164	0.823	0.965	-0.0985055	0.233888	0.15056	0.219091	-0.281036	-0.0513992	0.85438	0.446043	0.870888	0.784461	0.563428	0.929375
Rpl23a	5.87671e+07	0.935	0.939	0.856	0.9	1.042	0.945	-0.0969617	-0.0908029	-0.224317	-0.152003	0.0593553	-0.0816138	0.704054	0.749353	0.299246	0.392312	0.824459	0.853156
Rpl35a	3.93289e+07	0.935	0.998	0.95	0.973	0.994	1.01	-0.0969617	-0.00288828	-0.0740006	-0.0394883	-0.00868224	0.0143553	0.764275	0.99659	0.904829	0.836952	0.958874	0.996171
Map2	2.40484e+09	0.935	1	0.939	1.005	0.958	0.966	-0.0969617	0	-0.0908029	0.0071955	-0.0619024	-0.0499049	0.383432	0.988767	0.829575	0.960526	0.944756	0.876834
Rtca	1.74488e+06	0.935	0.926	0.898	1.026	1.062	1.041	-0.0969617	-0.110916	-0.155213	0.0370307	0.0867838	0.0579701	0.930729	0.919826	0.838111	0.989454	0.929869	0.999548
Lmna	3.4654e+08	0.935	1.014	0.932	1.047	0.942	0.997	-0.0969617	0.0200577	-0.101598	0.0662614	-0.086201	-0.00433459	0.389013	0.940614	0.782028	0.959759	0.873404	0.982367
Eef1b	1.09526e+08	0.935	1.07	0.988	1.052	1.108	1.162	-0.0969617	0.0976108	-0.0174171	0.0731347	0.147958	0.21661	0.558166	0.644348	0.990418	0.963083	0.432897	0.266875
Clasp1	8.30825e+06	0.935	1.124	1.043	1.078	0.988	1.012	-0.0969617	0.168642	0.0607392	0.108357	-0.0174171	0.0172093	0.892151	0.802641	0.968695	0.974391	0.996944	0.987051
Ide	1.08579e+07	0.935	1.05	0.974	1.093	0.879	0.989	-0.0969617	0.0703893	-0.0380063	0.128293	-0.186065	-0.0159576	0.839133	0.938799	0.955295	0.93141	0.819373	0.968101
Tnpo3	3.62831e+06	0.935	1.317	1.289	1.181	0.866	1.167	-0.0969617	0.397255	0.366252	0.240009	-0.207561	0.222805	0.924471	0.266	0.42	0.901708	0.886966	0.827876
Prkcg	4.91913e+08	1.038	0.818	0.863	1.007	0.912	0.932	0.0538064	-0.289827	-0.212568	0.0100637	-0.132894	-0.101598	0.85209	0.000466725	0.206939	0.965393	0.636783	0.610787
Tnks1bp1	7.41942e+06	0.936	1.077	1.091	0.937	0.969	0.912	-0.0954196	0.107018	0.125651	-0.093879	-0.0454314	-0.132894	0.911286	0.938799	0.922975	0.82254	0.999918	0.776525
Atp2b2	1.4794e+09	0.936	0.992	0.945	0.94	1.021	0.955	-0.0954196	-0.011588	-0.0816138	-0.0892673	0.0299829	-0.0664274	0.405918	0.998187	0.853391	0.571027	0.907514	0.814392
Opalin	1.0403e+07	0.936	1.095	1.091	0.942	1.021	0.915	-0.0954196	0.130931	0.125651	-0.086201	0.0299829	-0.128156	0.863176	0.862543	0.909354	0.79766	0.944926	0.736774
Mief1	889420	0.936	0.959	0.918	0.945	1.024	0.999	-0.0954196	-0.0603973	-0.123434	-0.0816138	0.0342157	-0.00144342	0.939725	0.956475	0.907414	0.896907	0.95882	0.982106
Rpl32	6.87131e+07	0.936	0.97	0.931	0.95	0.995	0.942	-0.0954196	-0.0439433	-0.103147	-0.0740006	-0.00723157	-0.086201	0.712633	0.921831	0.832266	0.752017	0.973626	0.837299
Prkce	1.35965e+08	0.936	1.043	0.959	0.96	1.049	0.999	-0.0954196	0.0607392	-0.0603973	-0.0588937	0.0690147	-0.00144342	0.521372	0.829351	0.922975	0.750064	0.739565	0.983612
Pa2g4	3.60183e+07	0.936	0.944	0.916	0.974	1.001	0.95	-0.0954196	-0.0831412	-0.12658	-0.0380063	0.00144197	-0.0740006	0.77021	0.846517	0.774583	0.854348	0.944926	0.883235
Brsk1	7.54625e+07	0.936	1.021	0.962	0.996	0.939	0.951	-0.0954196	0.0299829	-0.0558912	-0.00578235	-0.0908029	-0.0724828	0.683382	0.9619	0.935755	0.935042	0.918935	0.876834
Dars1	1.07136e+08	0.936	1.039	0.978	1.039	1.006	1.035	-0.0954196	0.0551957	-0.0320936	0.0551957	0.00863031	0.0496308	0.572564	0.895657	0.973644	0.980041	0.944926	0.943203
Sf1	2.06343e+06	1.043	1.444	1.43	1.497	0.594	0.952	0.0607392	0.530071	0.516015	0.582074	-0.751465	-0.0709665	0.961212	0.182269	0.369082	0.344663	0.0646826	0.929375
mKIAA0743	4.04356e+07	0.936	0.967	0.936	1.081	1.012	1.125	-0.0954196	-0.0484122	-0.0954196	0.112367	0.0172093	0.169925	0.77021	0.923141	0.85277	0.91007	0.924845	0.557779
Dmtn	7.97838e+07	0.936	0.933	0.852	1.111	0.974	1.09	-0.0954196	-0.100051	-0.231075	0.151859	-0.0380063	0.124328	0.656223	0.683502	0.239159	0.777783	0.987609	0.768216
Txn	1.50769e+08	0.936	1.026	0.966	1.138	1.025	1.166	-0.0954196	0.0370307	-0.0499049	0.186501	0.0356239	0.221568	0.456839	0.904584	0.938514	0.437602	0.885039	0.115034
Nova1	1.19462e+07	1.348	0.85	1.107	1.358	0.596	0.881	0.43082	-0.234465	0.146655	0.441483	-0.746616	-0.182786	0.00966453	0.410348	0.862507	0.349956	0.00129583	0.593657
Wdr26	2.91171e+06	0.937	0.802	0.752	0.901	1.107	1.042	-0.093879	-0.318326	-0.411195	-0.150401	0.146655	0.0593553	0.930729	0.513175	0.301897	0.866538	0.86195	0.989044
Paip1	2.87496e+06	0.937	1.048	0.945	0.928	0.849	0.922	-0.093879	0.0676387	-0.0816138	-0.107803	-0.236164	-0.117161	0.931819	0.984325	0.923434	0.89911	0.873259	0.8829
Cap2	2.96389e+08	0.937	0.998	0.93	0.976	0.922	0.943	-0.093879	-0.00288828	-0.104697	-0.0350469	-0.117161	-0.0846703	0.415395	0.993253	0.768272	0.848511	0.732342	0.713634
Map1a	1.95188e+09	0.937	0.991	0.931	0.984	0.952	0.94	-0.093879	-0.013043	-0.103147	-0.0232698	-0.0709665	-0.0892673	0.414061	0.99659	0.777013	0.870595	0.924845	0.689843
Rprd1b	763306	0.937	1.275	1.187	1.013	0.817	0.752	-0.093879	0.350497	0.24732	0.0186342	-0.291592	-0.411195	0.939912	0.723863	0.890486	0.965617	0.933686	0.493344
Gabrg2	1.29756e+07	0.937	1.061	0.974	1.02	0.893	0.954	-0.093879	0.0854247	-0.0380063	0.0285692	-0.163268	-0.0679388	0.805447	0.904584	0.959937	0.979323	0.8793	0.890778
Stx1a	5.29579e+08	0.937	1.034	0.958	1.06	0.86	0.916	-0.093879	0.0482362	-0.0619024	0.0840643	-0.217591	-0.12658	0.410581	0.849013	0.914107	0.910524	0.172489	0.450402
Gsr	4.59924e+07	0.971	0.826	0.893	0.944	0.999	0.911	-0.0424568	-0.275786	-0.163268	-0.0831412	-0.00144342	-0.134477	0.922776	0.020879	0.602178	0.700802	0.94865	0.653915
Sirpa	4.93136e+08	0.937	1.059	1.016	1.095	0.879	0.983	-0.093879	0.0827026	0.0229004	0.130931	-0.186065	-0.0247367	0.416321	0.584141	0.963321	0.746249	0.325165	0.94168
Psmd5	3.76328e+07	0.937	1.052	1.045	1.174	0.868	0.924	-0.093879	0.0731347	0.0635029	0.231432	-0.204233	-0.114035	0.732913	0.868017	0.933901	0.378573	0.589595	0.716464
Fn3krp	1.3269e+07	0.937	0.994	0.951	1.284	0.876	1.09	-0.093879	-0.00868224	-0.0724828	0.360645	-0.190997	0.124328	0.81897	0.982356	0.915769	0.303614	0.81627	0.879509
Csnk1a1	2.3679e+06	0.938	1.084	1.085	0.892	0.963	0.916	-0.0923402	0.116365	0.117695	-0.164884	-0.0543923	-0.12658	0.926456	0.923141	0.936143	0.855466	0.997978	0.864002
Gria4	8.88502e+06	0.938	0.965	0.932	0.991	1.025	1.015	-0.0923402	-0.0513992	-0.101598	-0.013043	0.0356239	0.0214797	0.894717	0.936685	0.887659	0.911326	0.925157	0.999853
Fus	7.12723e+07	0.938	1.008	0.96	1.025	0.935	0.996	-0.0923402	0.0114956	-0.0588937	0.0356239	-0.0969617	-0.00578235	0.689925	0.988849	0.933901	0.994798	0.900091	0.986715
Dync1li2	1.35427e+08	0.938	1.123	1.044	1.03	0.956	0.979	-0.0923402	0.167358	0.0621217	0.0426443	-0.0649175	-0.0306192	0.555238	0.209015	0.890607	0.994798	0.958874	0.953045
Dlg3	9.64703e+07	0.938	1.016	0.953	1.03	0.885	0.94	-0.0923402	0.0229004	-0.0694519	0.0426443	-0.176251	-0.0892673	0.610854	0.969211	0.914931	0.994999	0.504834	0.761748
Impact	1.84377e+07	0.938	0.886	0.838	1.046	1.124	1.167	-0.0923402	-0.174621	-0.254978	0.0648829	0.168642	0.222805	0.847746	0.543506	0.373662	0.996748	0.620619	0.534647
H1-4	7.4582e+07	1.105	0.827	0.938	1.044	1.028	1.065	0.144046	-0.274041	-0.0923402	0.0621217	0.0398403	0.0908534	0.383477	0.0225096	0.853391	0.974391	0.880078	0.838307
Clec16a	2.22727e+07	0.938	1.023	0.96	1.06	0.949	1.012	-0.0923402	0.0328061	-0.0588937	0.0840643	-0.07552	0.0172093	0.79734	0.977198	0.931177	0.983607	0.973626	0.989044
Ptprz1	2.81282e+08	0.938	0.977	0.94	1.064	0.876	0.938	-0.0923402	-0.0335695	-0.0892673	0.0894982	-0.190997	-0.0923402	0.430511	0.952657	0.83367	0.893016	0.299387	0.666249
Pip5k1c	1.64212e+08	0.938	0.94	0.897	1.065	1.003	1.032	-0.0923402	-0.0892673	-0.15682	0.0908534	0.00432161	0.045443	0.445737	0.676893	0.485886	0.888462	0.960082	0.956724
Khdrbs1	2.10045e+07	0.938	1.055	0.99	1.263	0.757	0.956	-0.0923402	0.077243	-0.0144996	0.336855	-0.401635	-0.0649175	0.798441	0.901835	0.980508	0.30583	0.106236	0.901509
Spast	1.58272e+07	100	0.01	1.477	0.99	0.742	0.704	6.64386	-6.64386	0.56267	-0.0144996	-0.430509	-0.506353	2.80253e-16	3.30088e-16	0.0056588	0.940711	0.162927	0.00286117
Arfgef1	606307	0.939	0.93	0.815	0.902	1.086	0.978	-0.0908029	-0.104697	-0.295128	-0.148801	0.119024	-0.0320936	0.94135	0.932607	0.721079	0.86253	0.90695	0.965769
Psmd12	6.90187e+06	0.939	1.045	0.969	0.926	0.958	0.901	-0.0908029	0.0635029	-0.0454314	-0.110916	-0.0619024	-0.150401	0.924471	0.968904	0.959937	0.866538	0.973626	0.760163
Metap2	5.01956e+07	0.939	0.983	0.932	0.936	0.936	0.875	-0.0908029	-0.0247367	-0.101598	-0.0954196	-0.0954196	-0.192645	0.754507	0.96315	0.840235	0.629545	0.952109	0.362487
Dynll1	2.38124e+08	0.939	1.001	0.957	0.945	1.113	1.111	-0.0908029	0.00144197	-0.0634092	-0.0816138	0.154454	0.151859	0.445177	0.985698	0.909354	0.624447	0.242034	0.484859
Stx1b	1.26747e+09	0.939	1.049	0.969	0.949	0.99	0.935	-0.0908029	0.0690147	-0.0454314	-0.07552	-0.0144996	-0.0969617	0.444003	0.700669	0.948583	0.667998	0.98607	0.639433
Htt	4.42232e+07	0.939	1.064	1.015	0.953	1.024	0.96	-0.0908029	0.0894982	0.0214797	-0.0694519	0.0342157	-0.0588937	0.766142	0.804485	0.987118	0.738935	0.886966	0.901509
Cacng3	1.49548e+07	0.915	1.036	0.889	1.191	0.546	0.707	-0.128156	0.051024	-0.169745	0.252173	-0.873027	-0.500218	0.677401	0.96315	0.682151	0.866379	0.000117033	0.00812952
Mrps5	930188	0.939	0.926	0.871	0.968	0.999	0.985	-0.0908029	-0.110916	-0.199255	-0.046921	-0.00144342	-0.0218044	0.947696	0.920045	0.83281	0.923886	0.973626	0.968101
Ilf2	3.86801e+07	0.939	0.974	0.929	1.033	1.048	1.047	-0.0908029	-0.0380063	-0.106249	0.0468403	0.0676387	0.0662614	0.773182	0.946347	0.835756	0.9931	0.780852	0.931364
Zyx	1.94577e+06	0.939	1.148	1.03	1.089	0.941	0.975	-0.0908029	0.199123	0.0426443	0.123004	-0.0877334	-0.0365259	0.939912	0.894848	0.99674	0.987083	0.987609	0.953045
Prnp	1.30884e+08	0.939	1.06	0.99	1.1	0.954	1.029	-0.0908029	0.0840643	-0.0144996	0.137504	-0.0679388	0.041243	0.557211	0.734133	0.990455	0.779458	0.955764	0.953807
Acyp2	8.34426e+06	0.939	1.029	0.976	1.111	0.93	1.049	-0.0908029	0.041243	-0.0350469	0.151859	-0.104697	0.0690147	0.893452	0.982356	0.961997	0.924825	0.944926	0.968433
Ctnna1	6.98658e+06	0.939	1.1	1.019	1.148	1.004	1.132	-0.0908029	0.137504	0.0271541	0.199123	0.00575927	0.178874	0.90512	0.87463	0.993296	0.878891	0.97548	0.841391
Mug1	3.05638e+06	0.94	1.098	1.002	0.687	1.423	0.909	-0.0892673	0.134878	0.00288251	-0.541618	0.508936	-0.137648	0.933378	0.918609	0.989372	0.206826	0.162927	0.865815
Acsbg1	9.69454e+07	0.94	0.977	0.914	0.954	0.959	0.936	-0.0892673	-0.0335695	-0.129734	-0.0679388	-0.0603973	-0.0954196	0.628596	0.943361	0.708261	0.746249	0.960968	0.747369
Nomo1	8.38459e+06	0.94	1.027	0.984	0.98	1.29	1.177	-0.0892673	0.0384362	-0.0232698	-0.0291463	0.367371	0.235114	0.894717	0.976773	0.968695	0.907286	0.213594	0.542939
Rpl11	8.70657e+07	0.94	0.944	0.88	0.993	0.928	0.953	-0.0892673	-0.0831412	-0.184425	-0.0101344	-0.107803	-0.0694519	0.677401	0.753301	0.44524	0.919329	0.858082	0.854132
Gabbr2	2.62139e+07	0.94	0.982	0.914	0.997	1.106	1.106	-0.0892673	-0.0262051	-0.129734	-0.00433459	0.145351	0.145351	0.805197	0.96315	0.761468	0.91991	0.623845	0.780316
Wdr37	4.32006e+07	0.94	1.027	0.961	1.015	0.982	1.059	-0.0892673	0.0384362	-0.0573917	0.0214797	-0.0262051	0.0827026	0.768817	0.957497	0.919697	0.974391	0.973626	0.903281
Gigyf2	977158	0.94	1.055	0.984	1.02	0.748	1.21	-0.0892673	0.077243	-0.0232698	0.0285692	-0.41889	0.275007	0.942769	0.989292	0.968695	0.963385	0.831851	0.865815
Ubqln2	1.26955e+08	0.94	1.002	0.954	1.038	0.964	0.978	-0.0892673	0.00288251	-0.0679388	0.0538064	-0.0528949	-0.0320936	0.587692	0.992473	0.908464	0.987083	0.973626	0.949142
Dlgap3	2.76771e+07	0.94	0.99	0.986	1.065	0.933	1.054	-0.0892673	-0.0144996	-0.0203404	0.0908534	-0.100051	0.0758749	0.805197	0.972195	0.970806	0.974593	0.952109	0.926592
Rap2c	2.11156e+07	0.94	1.188	1.119	1.075	0.77	0.869	-0.0892673	0.248535	0.16221	0.104337	-0.37707	-0.202572	0.850167	0.291696	0.774071	0.967525	0.160797	0.400997
Fxyd7	2.57781e+07	0.992	0.886	0.901	0.767	1.132	0.888	-0.011588	-0.174621	-0.150401	-0.382702	0.178874	-0.171368	0.991226	0.388451	0.679612	0.00644202	0.443142	0.532756
Kifbp	4.08648e+06	1.123	0.883	0.996	0.87	0.75	0.713	0.167358	-0.179515	-0.00578235	-0.200913	-0.415037	-0.488026	0.781684	0.762902	0.993054	0.792454	0.304099	0.0220535
Specc1	5.81733e+06	0.941	1.004	0.958	0.884	1.075	0.974	-0.0877334	0.00575927	-0.0619024	-0.177882	0.104337	-0.0380063	0.894717	0.998187	0.943953	0.52398	0.82954	0.948228
Rpl3	1.51046e+08	0.941	0.946	0.886	0.945	0.95	0.905	-0.0877334	-0.0800879	-0.174621	-0.0816138	-0.0740006	-0.14401	0.543147	0.749353	0.397877	0.623315	0.915555	0.347411
Purb	1.3674e+08	0.941	0.996	0.93	0.967	1.003	0.957	-0.0877334	-0.00578235	-0.104697	-0.0484122	0.00432161	-0.0634092	0.574041	0.998187	0.794714	0.795771	0.959424	0.831974
Ptpmt1	1.73453e+06	0.941	0.997	0.955	1.078	1.018	1.127	-0.0877334	-0.00433459	-0.0664274	0.108357	0.0257376	0.172488	0.931925	0.989292	0.933901	0.994798	0.958874	0.943203
Sqstm1	3.63302e+06	0.941	0.872	0.806	1.16	0.867	0.963	-0.0877334	-0.1976	-0.311148	0.214125	-0.205896	-0.0543923	0.939725	0.747662	0.523848	0.919106	0.887508	0.95009
Slc1a1	593785	0.827	0.833	0.765	1.308	0.602	0.841	-0.274041	-0.263612	-0.386468	0.387363	-0.732165	-0.249822	0.766847	0.700442	0.363946	0.738935	0.0108551	0.574727
Rps13	1.2249e+08	0.942	0.969	0.936	0.911	1.136	1.05	-0.086201	-0.0454314	-0.0954196	-0.134477	0.183963	0.0703893	0.612293	0.917517	0.837198	0.408556	0.205431	0.909452
Rpl36	7.06482e+07	0.942	0.991	0.927	0.923	0.965	0.935	-0.086201	-0.013043	-0.109359	-0.115597	-0.0513992	-0.0969617	0.764171	0.978579	0.803628	0.587935	0.973626	0.799301
Etfa	1.54293e+08	0.942	1.071	1.033	0.972	0.97	0.943	-0.086201	0.0989585	0.0468403	-0.0409718	-0.0439433	-0.0846703	0.52152	0.540916	0.922975	0.827225	0.973626	0.710913
Clip1	1.78475e+07	0.942	0.975	0.921	0.972	1.059	1.03	-0.086201	-0.0365259	-0.118727	-0.0409718	0.0827026	0.0426443	0.826424	0.95354	0.841205	0.827225	0.811961	0.975468
Hnrnpa0	3.35825e+07	0.942	0.931	0.885	0.976	1.008	0.998	-0.086201	-0.103147	-0.176251	-0.0350469	0.0114956	-0.00288828	0.801771	0.753039	0.606257	0.849309	0.943752	0.987051
Osbpl8	2.63462e+07	0.942	0.976	0.963	1.093	0.93	1.019	-0.086201	-0.0350469	-0.0543923	0.128293	-0.104697	0.0271541	0.81215	0.938785	0.932045	0.929448	0.944926	0.986715
Diaph1	1.65505e+08	0.928	1.131	1.208	1.297	0.603	1.048	-0.107803	0.177599	0.27262	0.375178	-0.72977	0.0676387	0.287111	0.0539146	0.0443775	0.00128737	1.93354e-14	0.903281
Nherf1	9.79693e+07	0.943	1.004	0.959	0.91	1.081	0.981	-0.0846703	0.00575927	-0.0603973	-0.136062	0.112367	-0.027675	0.674792	0.998109	0.932989	0.463319	0.616807	0.959455
Otud7b	721968	0.943	0.969	0.908	0.918	0.935	0.836	-0.0846703	-0.0454314	-0.139236	-0.123434	-0.0969617	-0.258425	0.958578	0.96515	0.905702	0.866538	0.996944	0.737631
Cd47	2.20037e+08	0.943	0.989	0.931	0.972	0.949	0.931	-0.0846703	-0.0159576	-0.103147	-0.0409718	-0.07552	-0.103147	0.494041	0.989292	0.774583	0.827225	0.908826	0.599615
Lingo1	3.10986e+07	0.943	1.016	0.983	0.975	1.01	1.021	-0.0846703	0.0229004	-0.0247367	-0.0365259	0.0143553	0.0299829	0.829711	0.989284	0.968695	0.859511	0.924845	0.983612
Tpp2	8.40285e+07	0.943	0.995	0.944	0.997	1.057	1.046	-0.0846703	-0.00723157	-0.0831412	-0.00433459	0.0799754	0.0648829	0.704054	0.991395	0.877766	0.930942	0.74795	0.929375
Gatd1	1.68641e+07	0.943	0.987	0.963	1.001	0.96	0.939	-0.0846703	-0.018878	-0.0543923	0.00144197	-0.0588937	-0.0908029	0.829898	0.97273	0.934231	0.942038	0.973626	0.853156
Scamp1	2.91494e+08	0.943	0.987	0.94	1.01	0.974	0.974	-0.0846703	-0.018878	-0.0892673	0.0143553	-0.0380063	-0.0380063	0.491791	0.984085	0.833582	0.974417	0.973626	0.906158
Epb41l3	6.41808e+08	0.943	0.967	0.914	1.022	0.927	0.955	-0.0846703	-0.0484122	-0.129734	0.0313952	-0.109359	-0.0664274	0.500549	0.904584	0.643363	0.994798	0.769952	0.812694
Sh3gl1	2.67021e+07	0.943	1	0.99	1.041	0.92	0.972	-0.0846703	0	-0.0144996	0.0579701	-0.120294	-0.0409718	0.81897	0.989292	0.974089	0.994798	0.929869	0.949992
Shank1	4.34578e+07	0.943	0.994	0.902	1.067	0.936	0.994	-0.0846703	-0.00868224	-0.148801	0.0935602	-0.0954196	-0.00868224	0.792435	0.984111	0.634268	0.93052	0.933686	0.985307
Exoc5	4.40558e+06	0.943	0.971	0.96	1.083	0.891	1.016	-0.0846703	-0.0424568	-0.0588937	0.115033	-0.166503	0.0229004	0.938264	0.96315	0.961997	0.986587	0.944926	0.996171
Arpc5	9.26283e+06	0.943	1.237	1.238	1.129	1.024	1.172	-0.0846703	0.306846	0.308011	0.175045	0.0342157	0.228973	0.885085	0.264866	0.50162	0.866538	0.94323	0.505341
Rab3gap2	4.88068e+07	0.943	1.089	0.986	1.139	0.902	0.969	-0.0846703	0.123004	-0.0203404	0.187768	-0.148801	-0.0454314	0.78152	0.603904	0.973644	0.676854	0.828391	0.931364
Brinp2	2.42196e+06	0.943	1.269	1.21	1.179	0.934	1.1	-0.0846703	0.343692	0.275007	0.237564	-0.0985055	0.137504	0.939962	0.592831	0.771215	0.914916	0.989261	0.960526
Strap	4.85268e+07	0.944	0.968	0.911	0.941	1.011	0.921	-0.0831412	-0.046921	-0.134477	-0.0877334	0.015783	-0.118727	0.792066	0.907128	0.710138	0.653767	0.931062	0.700543
Gpm6a	1.46369e+09	0.944	1.023	0.986	0.959	1.027	0.966	-0.0831412	0.0328061	-0.0203404	-0.0603973	0.0384362	-0.0499049	0.510516	0.901835	0.979993	0.746249	0.881138	0.876834
Abi2	5.35039e+07	0.944	0.979	0.936	0.96	1.008	0.998	-0.0831412	-0.0306192	-0.0954196	-0.0588937	0.0114956	-0.00288828	0.787291	0.95354	0.836446	0.796638	0.94865	0.986715
Atp2a2	1.0966e+09	0.944	1.017	0.974	0.961	1.017	0.985	-0.0831412	0.0243197	-0.0380063	-0.0573917	0.0243197	-0.0218044	0.509119	0.927301	0.95908	0.762212	0.923344	0.9469
Hars	7.64735e+07	0.944	1.112	1.014	1.056	1.039	1.047	-0.0831412	0.153157	0.0200577	0.0786098	0.0551957	0.0662614	0.706227	0.356394	0.968695	0.952887	0.843752	0.92228
Arhgap35	1.08422e+07	0.944	1.16	1.145	1.115	1.001	1.146	-0.0831412	0.214125	0.195348	0.157044	0.00144197	0.196607	0.887352	0.570822	0.782833	0.89989	0.973626	0.684608
Luzp1	691809	0.945	0.825	0.83	0.75	1.165	0.733	-0.0816138	-0.277534	-0.268817	-0.415037	0.22033	-0.448115	0.953162	0.759706	0.810543	0.399233	0.765365	0.297708
Cryz	2.23696e+07	0.945	1.013	1.004	0.955	1.069	1.023	-0.0816138	0.0186342	0.00575927	-0.0664274	0.0962619	0.0328061	0.843945	0.998187	0.99772	0.767552	0.772037	0.983612
Msra	3.53572e+06	0.945	1.12	1.074	0.956	0.953	0.912	-0.0816138	0.163499	0.102994	-0.0649175	-0.0694519	-0.132894	0.941689	0.901835	0.959937	0.932017	0.973626	0.876834
Slc1a2	2.70882e+06	0.799	1.812	1.424	1.726	0.608	1.067	-0.323733	0.857583	0.509949	0.787432	-0.717857	0.0935602	0.461811	0.00346335	0.223874	0.082509	0.0937811	0.97844
Dgkg	6.6789e+06	0.945	1.108	1.042	1.003	0.945	0.926	-0.0816138	0.147958	0.0593553	0.00432161	-0.0816138	-0.110916	0.937545	0.882487	0.973894	0.942287	0.960968	0.751539
Hnrnpk	1.39296e+07	0.945	1.029	1.018	1.022	0.921	0.922	-0.0816138	0.041243	0.0257376	0.0313952	-0.118727	-0.117161	0.867096	0.97273	0.989372	0.975399	0.924845	0.769657
Rasgrf1	3.22956e+06	0.945	1.113	1.031	1.023	0.97	0.99	-0.0816138	0.154454	0.0440443	0.0328061	-0.0439433	-0.0144996	0.94242	0.904584	0.992578	0.991683	0.991332	0.980927
Rpl24	6.45564e+07	1.017	0.85	0.85	0.963	1.127	1.141	0.0243197	-0.234465	-0.234465	-0.0543923	0.172488	0.190299	0.958708	0.0644663	0.247612	0.831163	0.335663	0.477903
C3	5.45311e+06	0.946	1.099	1.125	0.926	1.091	0.964	-0.0800879	0.136191	0.169925	-0.110916	0.125651	-0.0528949	0.935582	0.895321	0.854986	0.866538	0.849457	0.938472
Prkcb	3.46867e+08	1.076	0.85	0.884	1.021	0.879	0.915	0.105678	-0.234465	-0.177882	0.0299829	-0.186065	-0.128156	0.44418	0.0100572	0.377019	0.994798	0.326119	0.444874
Rasal2	4.61372e+06	0.946	0.754	0.856	0.999	0.911	0.953	-0.0800879	-0.407364	-0.224317	-0.00144342	-0.134477	-0.0694519	0.939912	0.18775	0.722495	0.974593	0.952109	0.934479
Atp5mg	2.21699e+07	0.812	1.391	1.146	0.851	0.895	0.714	-0.300448	0.476122	0.196607	-0.232769	-0.16004	-0.486004	0.0253331	0.00100688	0.633491	0.433081	0.885039	0.00454277
Raly	519184	0.946	1.003	0.946	1.115	0.95	1.11	-0.0800879	0.00432161	-0.0800879	0.157044	-0.0740006	0.15056	0.961212	0.989292	0.95288	0.994798	0.977391	0.968101
Jam3	3.92669e+06	0.948	1.01	0.89	0.733	1.122	0.721	-0.077041	0.0143553	-0.168123	-0.448115	0.166073	-0.471929	0.894296	0.999791	0.754428	0.015624	0.649054	0.0135006
Pigs	4.76312e+06	0.947	1.119	1.038	0.728	0.994	0.923	-0.0785637	0.16221	0.0538064	-0.45799	-0.00868224	-0.115597	0.947195	0.914179	0.973474	0.243043	0.978596	0.8829
Fabp7	1.52529e+07	0.695	1.022	0.721	0.79	1.082	0.897	-0.524915	0.0313952	-0.471929	-0.340075	0.1137	-0.15682	2.4675e-05	0.984111	0.0110222	0.0233731	0.707404	0.604017
Ergic1	2.51651e+07	0.947	0.977	0.925	0.923	1.023	0.945	-0.0785637	-0.0335695	-0.112475	-0.115597	0.0328061	-0.0816138	0.85438	0.936685	0.802597	0.609961	0.920558	0.876834
Sdcbp	3.67717e+06	0.947	1.073	1.014	0.981	0.885	0.836	-0.0785637	0.10165	0.0200577	-0.027675	-0.176251	-0.258425	0.94135	0.952657	0.996138	0.946904	0.831974	0.356787
Dcaf7	3.18428e+06	0.947	0.838	0.89	0.982	1.038	0.978	-0.0785637	-0.254978	-0.168123	-0.0262051	0.0538064	-0.0320936	0.94135	0.451065	0.836151	0.951169	0.944926	0.956586
Inpp1	2.94294e+07	0.947	0.968	0.961	0.986	0.996	1.017	-0.0785637	-0.046921	-0.0573917	-0.0203404	-0.00578235	0.0243197	0.85209	0.920053	0.930634	0.877162	0.964895	0.986715
Fbxl16	7.46964e+07	0.947	1	0.96	1.006	0.969	0.987	-0.0785637	0	-0.0588937	0.00863031	-0.0454314	-0.018878	0.77021	0.998945	0.933901	0.957622	0.98981	0.972461
Lgi1	1.84703e+08	0.947	0.999	0.937	1.008	0.966	0.969	-0.0785637	-0.00144342	-0.093879	0.0114956	-0.0499049	-0.0454314	0.553055	0.989292	0.820085	0.96815	0.961301	0.890011
Lasp1	2.64599e+08	0.947	1.004	0.942	1.015	0.991	1.023	-0.0785637	0.00575927	-0.086201	0.0214797	-0.013043	0.0328061	0.554796	0.974827	0.843871	0.987083	0.983546	0.982367
Tfrc	8.58333e+06	0.947	0.92	0.865	1.019	0.966	0.975	-0.0785637	-0.120294	-0.209228	0.0271541	-0.0499049	-0.0365259	0.894717	0.792723	0.625732	0.979906	0.996388	0.947433
Rims2	160653	0.947	1.052	0.987	1.049	1.101	1.141	-0.0785637	0.0731347	-0.018878	0.0690147	0.138814	0.190299	0.967193	0.998961	0.973644	0.987083	0.920738	0.960533
Pfas	1.13363e+07	0.947	1.028	1.045	1.071	1.075	1.078	-0.0785637	0.0398403	0.0635029	0.0989585	0.104337	0.108357	0.887352	0.974827	0.970101	0.974391	0.779699	0.865815
Vkorc1l1	1.7203e+06	0.947	1.179	1.003	1.083	1.06	1.164	-0.0785637	0.237564	0.00432161	0.115033	0.0840643	0.219091	0.942769	0.831775	0.973644	0.998267	0.93172	0.902493
Ccsap	2.01678e+07	0.947	1.051	1.018	1.109	0.952	1.023	-0.0785637	0.0717627	0.0257376	0.149259	-0.0709665	0.0328061	0.887352	0.930778	0.979283	0.91007	0.973626	0.986715
Plxnb2	2.72963e+06	1.153	1.14	1.207	1.633	0.615	1.143	0.205393	0.189034	0.271426	0.707525	-0.701342	0.192825	0.771469	0.898166	0.792011	0.190687	0.081079	0.876126
Prrt1	7.20145e+06	0.948	0.915	0.878	0.887	1.031	0.927	-0.077041	-0.128156	-0.187707	-0.172994	0.0440443	-0.109359	0.931819	0.816324	0.715985	0.347361	0.904099	0.801333
Map1b	1.16222e+09	0.948	0.967	0.926	0.939	0.97	0.912	-0.077041	-0.0484122	-0.110916	-0.0908029	-0.0439433	-0.132894	0.574941	0.904584	0.738976	0.569428	0.973626	0.415447
ND2	4.4238e+06	1.196	0.981	1.171	1.532	0.617	1.053	0.258217	-0.027675	0.227741	0.615416	-0.696658	0.0745054	0.554525	0.964159	0.732313	0.119759	0.0119122	0.982367
Rps3	2.11425e+08	0.948	1.062	0.981	0.959	0.987	0.95	-0.077041	0.0867838	-0.027675	-0.0603973	-0.018878	-0.0740006	0.575783	0.567615	0.973644	0.746249	0.995117	0.781301
Prpf19	3.74944e+07	0.948	0.968	0.901	0.965	0.997	0.969	-0.077041	-0.046921	-0.150401	-0.0513992	-0.00433459	-0.0454314	0.841066	0.925063	0.679612	0.806365	0.957934	0.93682
Capzb	3.33329e+08	0.948	1.028	0.977	0.97	1.06	1.034	-0.077041	0.0398403	-0.0335695	-0.0439433	0.0840643	0.0482362	0.564333	0.895657	0.964872	0.817033	0.654055	0.95009
Nono	1.01935e+08	0.948	1.015	1.026	0.985	1.044	1.029	-0.077041	0.0214797	0.0370307	-0.0218044	0.0621217	0.041243	0.704054	0.965626	0.940855	0.900496	0.789139	0.955787
Canx	2.38768e+08	0.948	1.04	1.007	1.001	0.952	0.952	-0.077041	0.0565835	0.0100637	0.00144197	-0.0709665	-0.0709665	0.574911	0.793387	0.97701	0.949982	0.924054	0.792954
Lmnb2	6.25761e+07	0.948	1.001	0.959	1.001	0.917	0.889	-0.077041	0.00144197	-0.0603973	0.00144197	-0.125006	-0.169745	0.805197	0.999791	0.930634	0.948259	0.828364	0.451561
Adgrl1	2.10694e+07	0.948	0.944	0.895	1.004	1.071	1.142	-0.077041	-0.0831412	-0.16004	0.00575927	0.0989585	0.191563	0.856003	0.848168	0.654466	0.940163	0.742972	0.532756
Ogt	1.10884e+08	0.948	1.015	0.961	1.009	0.985	0.99	-0.077041	0.0214797	-0.0573917	0.0129262	-0.0218044	-0.0144996	0.701604	0.966572	0.933901	0.974391	0.987524	0.982367
Ugp2	7.09242e+07	0.948	1.024	0.962	1.019	1.033	1.048	-0.077041	0.0342157	-0.0558912	0.0271541	0.0468403	0.0676387	0.790274	0.95354	0.936334	0.987083	0.878138	0.92623
Ppa2	6.6295e+07	0.948	1.157	1.072	1.04	0.883	0.967	-0.077041	0.210389	0.100305	0.0565835	-0.179515	-0.0484122	0.798441	0.141866	0.796943	0.989425	0.573111	0.92228
Arhgap39	975230	0.948	0.942	0.886	1.047	1.035	1.083	-0.077041	-0.086201	-0.174621	0.0662614	0.0496308	0.115033	0.961212	0.923271	0.821711	0.994798	0.915555	0.890011
Arhgap26	1.08407e+07	0.948	1.023	0.969	1.089	0.928	1.118	-0.077041	0.0328061	-0.0454314	0.123004	-0.107803	0.16092	0.88828	0.984085	0.95288	0.948347	0.95324	0.796779
Clasp2	8.68383e+07	0.949	0.992	0.943	0.949	1.053	0.996	-0.07552	-0.011588	-0.0846703	-0.07552	0.0745054	-0.00578235	0.735674	0.988849	0.877627	0.736162	0.745735	0.985307
Ap2s1	1.15672e+08	1.019	0.852	0.896	1.081	0.961	0.983	0.0271541	-0.231075	-0.158429	0.112367	-0.0573917	-0.0247367	0.951411	0.0421689	0.581081	0.866538	0.965536	0.957341
Hspa12a	5.26662e+08	0.949	1.009	0.977	1.017	0.985	1.003	-0.07552	0.0129262	-0.0335695	0.0243197	-0.0218044	0.00432161	0.586511	0.961685	0.965235	0.989425	0.999918	0.986715
Prkacb	2.60371e+08	0.949	0.959	0.906	1.026	0.966	1.027	-0.07552	-0.0603973	-0.142417	0.0370307	-0.0499049	0.0384362	0.583304	0.879226	0.581702	0.997689	0.961719	0.96915
Rpl27a	5.7743e+07	0.949	0.933	0.896	1.041	0.901	0.951	-0.07552	-0.100051	-0.158429	0.0579701	-0.150401	-0.0724828	0.805197	0.722946	0.634268	0.990615	0.756079	0.876834
Atp1a2	1.74599e+09	0.949	1.003	0.952	1.043	0.933	0.982	-0.07552	0.00432161	-0.0709665	0.0607392	-0.100051	-0.0262051	0.587692	0.975707	0.887659	0.966281	0.811961	0.941232
Snap47	6.22633e+07	0.949	1.034	0.981	1.052	0.922	0.99	-0.07552	0.0482362	-0.027675	0.0731347	-0.117161	-0.0144996	0.810112	0.921831	0.976973	0.974593	0.886966	0.977734
Mpp2	1.60822e+08	0.949	1.034	0.998	1.056	0.925	1.005	-0.07552	0.0482362	-0.00288828	0.0786098	-0.112475	0.0071955	0.636147	0.895657	0.997779	0.941482	0.82954	0.999548
Ppp1r1b	1.76849e+08	0.949	1.012	0.982	1.088	0.959	1.011	-0.07552	0.0172093	-0.0262051	0.121679	-0.0603973	0.015783	0.60015	0.96315	0.973644	0.94807	0.973666	0.996171
Nefh	2.54841e+08	1.116	0.864	0.956	0.944	0.993	0.916	0.158337	-0.210897	-0.0649175	-0.0831412	-0.0101344	-0.12658	0.088771	0.0292271	0.904829	0.617458	0.974815	0.453426
Ank2	5.32837e+06	1.284	0.924	1.181	1.678	0.621	1.054	0.360645	-0.114035	0.240009	0.746743	-0.687335	0.0758749	0.222172	0.895056	0.694368	0.0593189	0.0147967	0.972461
Actbl2	3.34181e+09	0.95	1.079	1.056	1	1.001	0.966	-0.0740006	0.109695	0.0786098	0	0.00144197	-0.0499049	0.591551	0.370217	0.830472	0.945585	0.964994	0.876834
Plxna4	1.2241e+08	0.95	1.01	1.016	1.024	1.029	1.039	-0.0740006	0.0143553	0.0229004	0.0342157	0.041243	0.0551957	0.704054	0.974031	0.966763	0.997636	0.858811	0.929375
Cspg5	8.53042e+07	0.95	0.996	0.948	1.041	0.997	0.986	-0.0740006	-0.00578235	-0.077041	0.0579701	-0.00433459	-0.0203404	0.764275	0.994722	0.888665	0.987083	0.973626	0.972461
Glod4	1.21007e+08	0.95	1.005	0.984	1.075	0.937	1.01	-0.0740006	0.0071955	-0.0232698	0.104337	-0.093879	0.0143553	0.688245	0.985698	0.978248	0.871193	0.905372	0.996171
Slc17a6	1.44816e+07	0.95	1.083	1.031	1.164	0.944	1.064	-0.0740006	0.115033	0.0440443	0.219091	-0.0831412	0.0894982	0.875497	0.883232	0.973644	0.767552	0.973626	0.938747
Adcy2	6.43397e+06	0.95	1.122	1.101	1.282	0.765	1.031	-0.0740006	0.166073	0.138814	0.358396	-0.386468	0.0440443	0.944519	0.847606	0.90451	0.594857	0.35857	0.986715
Acly	2.06193e+07	1.278	0.618	0.781	0.804	1.114	0.935	0.353888	-0.694321	-0.356606	-0.314733	0.155749	-0.0969617	0.0144252	4.94507e-08	0.0531726	0.0538022	0.609109	0.836089
Hnrnpm	1.17956e+08	0.951	0.989	0.947	0.95	1.084	0.967	-0.0724828	-0.0159576	-0.0785637	-0.0740006	0.116365	-0.0484122	0.718696	0.980625	0.888665	0.738935	0.545273	0.914404
Negr1	1.10623e+08	0.951	0.893	0.851	0.951	1.03	1.015	-0.0724828	-0.163268	-0.232769	-0.0724828	0.0426443	0.0214797	0.711399	0.229979	0.189153	0.779607	0.888341	0.986929
Prrt3	1.3065e+07	0.951	0.99	0.967	0.954	0.874	0.867	-0.0724828	-0.0144996	-0.0484122	-0.0679388	-0.194295	-0.205896	0.891934	0.974827	0.949385	0.857779	0.792608	0.479868
Syt1	1.58363e+09	1.091	0.866	0.933	1.022	1.033	1.053	0.125651	-0.207561	-0.100051	0.0313952	0.0468403	0.0745054	0.264197	0.032671	0.786575	0.994798	0.843752	0.890011
Csnk2a2	1.19208e+07	0.951	1.101	1.074	1.033	0.936	1.081	-0.0724828	0.138814	0.102994	0.0468403	-0.0954196	0.112367	0.884525	0.761174	0.930572	0.994798	0.94865	0.841391
Rab8b	5.04267e+06	0.951	0.989	0.921	1.034	1.205	1.25	-0.0724828	-0.0159576	-0.118727	0.0482362	0.269033	0.321928	0.946363	0.969211	0.878138	0.994878	0.483046	0.358309
Rps4x	8.83244e+07	0.951	1.058	0.984	1.039	0.898	0.925	-0.0724828	0.0813396	-0.0232698	0.0551957	-0.155213	-0.112475	0.77021	0.784198	0.978264	0.987083	0.665233	0.664746
Rpl17	5.37074e+07	0.951	0.946	0.899	1.072	0.961	1.036	-0.0724828	-0.0800879	-0.153607	0.100305	-0.0573917	0.051024	0.827968	0.810033	0.617375	0.920509	0.989707	0.953045
Cyfip1	2.18649e+07	0.951	1.025	0.974	1.101	0.862	0.959	-0.0724828	0.0356239	-0.0380063	0.138814	-0.21424	-0.0603973	0.879156	0.974827	0.956592	0.866538	0.593186	0.901509
Cracdl	1.87365e+08	1.024	0.869	0.929	0.977	1.014	0.974	0.0342157	-0.202572	-0.106249	-0.0335695	0.0200577	-0.0380063	0.939317	0.0402214	0.76229	0.854701	0.933686	0.905111
Cmas	6.37567e+06	0.952	1.02	0.901	0.844	1.205	1.125	-0.0709665	0.0285692	-0.150401	-0.244685	0.269033	0.169925	0.933641	0.994722	0.807466	0.637578	0.609109	0.846103
Mapt	9.9292e+08	0.952	0.982	0.935	0.937	1.037	0.986	-0.0709665	-0.0262051	-0.0969617	-0.093879	0.0524159	-0.0203404	0.624792	0.968904	0.802146	0.54579	0.81678	0.949219
Trim28	7.61984e+07	0.952	0.959	0.901	0.969	0.972	0.939	-0.0709665	-0.0603973	-0.150401	-0.0454314	-0.0409718	-0.0908029	0.832838	0.895657	0.634268	0.823341	0.999918	0.822566
Sec24c	2.9812e+07	0.952	1.01	0.969	0.98	0.996	0.929	-0.0709665	0.0143553	-0.0454314	-0.0291463	-0.00578235	-0.106249	0.88394	0.998109	0.950702	0.866538	0.958874	0.803106
Adprh	2.04343e+08	1.016	0.87	0.942	1.008	0.974	0.982	0.0229004	-0.200913	-0.086201	0.0114956	-0.0380063	-0.0262051	0.961465	0.040809	0.843871	0.967867	0.973626	0.938631
Snph	2.49274e+07	0.952	1.036	0.98	1.06	1.004	1.049	-0.0709665	0.051024	-0.0291463	0.0840643	0.00575927	0.0690147	0.879156	0.953246	0.964872	0.974593	0.944926	0.931364
Rpl27	7.95357e+07	0.952	1.005	0.932	1.072	0.951	0.954	-0.0709665	0.0071955	-0.101598	0.100305	-0.0724828	-0.0679388	0.795429	0.99659	0.828556	0.906143	0.951532	0.876126
Gm7324	7.11624e+07	0.952	1.019	0.958	1.211	0.898	1.063	-0.0709665	0.0271541	-0.0619024	0.276199	-0.155213	0.0881416	0.828219	0.965376	0.929249	0.194227	0.762301	0.890778
Homer1	1.55529e+08	1.037	0.87	0.909	1.014	1.042	1.043	0.0524159	-0.200913	-0.137648	0.0200577	0.0593553	0.0607392	0.871585	0.0570499	0.622445	0.987083	0.796103	0.921851
Cyp2r1	1.46948e+07	0.953	1.026	1.009	0.847	1.174	1.034	-0.0694519	0.0370307	0.0129262	-0.239566	0.231432	0.0482362	0.894717	0.983954	0.999991	0.291457	0.408315	0.983544
Basp1	2.54029e+09	0.953	0.958	0.908	0.978	1.016	0.985	-0.0694519	-0.0619024	-0.139236	-0.0320936	0.0229004	-0.0218044	0.638638	0.874333	0.610378	0.862676	0.924845	0.946024
Elavl4	8.08912e+07	0.953	0.999	0.979	1.005	0.987	0.987	-0.0694519	-0.00144342	-0.0306192	0.0071955	-0.018878	-0.018878	0.798441	0.998187	0.971048	0.965364	0.985431	0.977734
Trio	5.56613e+07	0.953	1.014	0.983	1.059	0.893	0.939	-0.0694519	0.0200577	-0.0247367	0.0827026	-0.163268	-0.0908029	0.837219	0.975707	0.968695	0.96452	0.778282	0.836657
Lonp1	6.01971e+07	0.953	0.944	0.896	1.101	0.893	0.949	-0.0694519	-0.0831412	-0.158429	0.138814	-0.163268	-0.07552	0.836261	0.816324	0.600827	0.82657	0.735947	0.866577
Kif1a	3.71472e+07	0.954	1.028	0.96	0.917	1.003	0.918	-0.0679388	0.0398403	-0.0588937	-0.125006	0.00432161	-0.123434	0.86271	0.95354	0.919099	0.462354	0.944926	0.689843
Plaa	1.61558e+07	0.954	0.99	1.009	0.958	0.912	0.868	-0.0679388	-0.0144996	0.0129262	-0.0619024	-0.132894	-0.204233	0.884525	0.978579	0.999389	0.833232	0.901483	0.415287
Mapk10	6.09146e+07	0.954	1.011	0.998	1.039	1.091	1.146	-0.0679388	0.015783	-0.00288828	0.0551957	0.125651	0.196607	0.843945	0.985424	0.99674	0.993967	0.577222	0.399299
Coro7	2.7439e+07	0.954	1.005	0.942	1.04	0.94	0.966	-0.0679388	0.0071955	-0.086201	0.0565835	-0.0892673	-0.0499049	0.876883	0.998961	0.881848	0.998978	0.958874	0.929375
Itsn1	2.45286e+07	0.954	1.007	0.954	1.105	0.941	1.063	-0.0679388	0.0100637	-0.0679388	0.144046	-0.0877334	0.0881416	0.881429	0.998187	0.919099	0.871193	0.964895	0.903281
Serpina1b	5.96737e+06	0.735	1.291	0.918	0.849	0.78	0.722	-0.444184	0.368489	-0.123434	-0.236164	-0.358454	-0.469929	0.0110429	0.111778	0.853002	0.641168	0.35875	0.0173245
Myo18a	6.35006e+07	0.954	0.935	0.871	1.123	0.91	1.009	-0.0679388	-0.0969617	-0.199255	0.167358	-0.136062	0.0129262	0.844108	0.723863	0.38964	0.727531	0.820626	0.999853
Tubb6	5.93341e+08	1.111	0.87	1.021	1.034	1.063	1.107	0.151859	-0.200913	0.0299829	0.0482362	0.0881416	0.146655	0.112283	0.0411107	0.955295	0.987083	0.628115	0.51626
Spag7	459564	0.955	1.041	0.96	0.702	1.171	0.858	-0.0664274	0.0579701	-0.0588937	-0.510457	0.227741	-0.22095	0.967469	0.998187	0.959937	0.568465	0.81164	0.840135
Gabbr1	2.10978e+07	0.955	0.929	0.883	0.894	1.132	0.984	-0.0664274	-0.106249	-0.179515	-0.161653	0.178874	-0.0232698	0.892151	0.804933	0.63955	0.523667	0.622661	0.959455
Soga3	7.43215e+07	0.955	1.086	0.974	0.901	1.056	0.976	-0.0664274	0.119024	-0.0380063	-0.150401	0.0786098	-0.0350469	0.809986	0.573689	0.966474	0.305039	0.746512	0.941738
Plcb1	3.53717e+08	1.016	0.874	0.884	1.04	0.975	1.037	0.0229004	-0.194295	-0.177882	0.0565835	-0.0365259	0.0524159	0.962972	0.0539146	0.371702	0.974593	0.97529	0.945975
Glg1	1.64487e+07	0.955	0.97	0.969	0.976	0.934	0.947	-0.0664274	-0.0439433	-0.0454314	-0.0350469	-0.0985055	-0.0785637	0.886648	0.940614	0.953296	0.89173	0.94865	0.876834
Prdx1	9.26393e+08	0.955	0.994	0.961	0.979	1.014	0.982	-0.0664274	-0.00868224	-0.0573917	-0.0306192	0.0200577	-0.0262051	0.664443	0.999791	0.922975	0.866538	0.930584	0.941263
Pacsin1	1.30577e+09	0.955	0.988	0.938	0.98	0.984	0.969	-0.0664274	-0.0174171	-0.0923402	-0.0291463	-0.0232698	-0.0454314	0.662432	0.988656	0.823566	0.866538	0.999918	0.890011
Rab14	2.00455e+08	1.204	0.881	1.074	1.022	0.928	0.948	0.267835	-0.182786	0.102994	0.0313952	-0.107803	-0.077041	0.000225708	0.0823914	0.712327	0.994798	0.774642	0.759984
Crkl	3.38181e+07	0.955	1.029	0.962	1.018	0.953	0.963	-0.0664274	0.041243	-0.0558912	0.0257376	-0.0694519	-0.0543923	0.881868	0.952657	0.931746	0.965941	0.974202	0.922219
Slc1a3	8.09162e+08	0.955	1.035	0.998	1.154	0.901	1.034	-0.0664274	0.0496308	-0.00288828	0.206643	-0.150401	0.0482362	0.660374	0.845952	0.99674	0.281655	0.542542	0.95009
Cat	7.55918e+06	1.083	1.151	1.23	0.912	0.646	0.724	0.115033	0.202888	0.298658	-0.132894	-0.630394	-0.465938	0.836261	0.723863	0.574906	0.777277	0.0122106	0.0223569
Mrpl46	744685	0.956	1.049	0.958	0.928	0.85	0.776	-0.0649175	0.0690147	-0.0619024	-0.107803	-0.234465	-0.365871	0.961212	0.985698	0.955295	0.89536	0.958874	0.572388
Rpl10	7.51054e+07	0.956	0.929	0.899	0.93	1.084	0.998	-0.0649175	-0.106249	-0.153607	-0.104697	0.116365	-0.00288828	0.818419	0.622625	0.618371	0.562448	0.580023	0.986715
Hprt1	1.64303e+08	0.956	1.035	0.986	0.959	0.98	0.953	-0.0649175	0.0496308	-0.0203404	-0.0603973	-0.0291463	-0.0694519	0.679741	0.849131	0.977871	0.779607	0.999918	0.830123
Acadl	1.26172e+08	0.956	1.029	0.978	0.986	1.025	1.009	-0.0649175	0.041243	-0.0320936	-0.0203404	0.0356239	0.0129262	0.757438	0.904584	0.968695	0.907258	0.885115	0.989039
L1cam	9.31454e+07	0.956	0.988	0.942	0.997	0.959	0.987	-0.0649175	-0.0174171	-0.086201	-0.00433459	-0.0603973	-0.018878	0.798441	0.974827	0.878768	0.93052	0.964994	0.977734
Dbn1	4.05797e+08	0.956	0.955	0.917	1	0.983	0.989	-0.0649175	-0.0664274	-0.125006	0	-0.0247367	-0.0159576	0.677161	0.848998	0.665464	0.946874	0.999918	0.957028
Acadm	1.71524e+07	0.956	1.046	1.019	1.007	1.006	1.012	-0.0649175	0.0648829	0.0271541	0.0100637	0.00863031	0.0172093	0.887352	0.936685	0.983175	0.947639	0.956685	0.999853
Tpm3	1.46885e+07	1.033	1.247	1.283	1.003	0.979	0.731	0.0468403	0.318461	0.359521	0.00432161	-0.0306192	-0.452057	0.94135	0.139664	0.194028	0.975399	0.996944	0.0831536
Eef1g	3.88183e+08	0.956	0.993	0.981	1.031	0.976	1.03	-0.0649175	-0.0101344	-0.027675	0.0440443	-0.0350469	0.0426443	0.670385	0.998945	0.973644	0.991683	0.976709	0.960694
Taldo1	7.93349e+07	0.956	1.139	1.109	1.063	1.113	1.189	-0.0649175	0.187768	0.149259	0.0881416	0.154454	0.249749	0.83087	0.245968	0.581323	0.960526	0.380606	0.247042
Hnrnpu	3.44206e+08	0.956	0.993	0.95	1.107	0.952	1.054	-0.0649175	-0.0101344	-0.0740006	0.146655	-0.0709665	0.0758749	0.677161	0.998961	0.87948	0.665049	0.921948	0.885167
Pigk	1.56063e+06	0.956	1.034	1.038	1.389	0.999	1.266	-0.0649175	0.0482362	0.0538064	0.474047	-0.00144342	0.340277	0.961212	0.988767	0.99805	0.603217	0.973626	0.56896
Psd3	1.08013e+08	0.999	0.817	0.828	1.062	0.949	1.008	-0.00144342	-0.291592	-0.272297	0.0867838	-0.07552	0.0114956	0.992929	0.00239363	0.0810615	0.906346	0.909622	0.999548
Prkab2	3.24505e+06	0.956	0.919	1.041	1.407	0.651	1.029	-0.0649175	-0.121863	0.0579701	0.492622	-0.619271	0.041243	0.961212	0.898166	0.981881	0.552162	0.106152	0.999853
Sfpq	1.41814e+08	0.957	0.952	0.905	0.903	0.973	0.895	-0.0634092	-0.0709665	-0.14401	-0.147202	-0.0394883	-0.16004	0.739	0.822884	0.581702	0.235102	0.973626	0.267008
Ppm1a	8.10492e+07	0.957	0.967	0.946	0.931	1.013	0.957	-0.0634092	-0.0484122	-0.0800879	-0.103147	0.0186342	-0.0634092	0.818096	0.912741	0.885774	0.552162	0.93743	0.876834
Cryab	3.29417e+07	0.957	1.007	0.967	0.948	1.074	0.965	-0.0634092	0.0100637	-0.0484122	-0.077041	0.102994	-0.0513992	0.887067	0.998109	0.943392	0.733261	0.674802	0.931364
Uchl5	9.14693e+06	0.957	1.086	1.018	0.978	1.12	1.087	-0.0634092	0.119024	0.0257376	-0.0320936	0.163499	0.120352	0.926456	0.895657	0.99772	0.935215	0.765382	0.929375
Rabggta	1.76004e+07	0.957	0.883	0.807	0.981	1.044	1.103	-0.0634092	-0.179515	-0.309359	-0.027675	0.0621217	0.141433	0.911411	0.474976	0.200001	0.87692	0.880511	0.796779
Hsp90b1	2.57292e+08	0.957	1.041	0.99	0.985	1.008	0.994	-0.0634092	0.0579701	-0.0144996	-0.0218044	0.0114956	-0.00868224	0.681191	0.784198	0.989795	0.881372	0.94865	0.975049
Ptprs	1.07661e+08	0.957	1.037	1.005	0.985	0.969	0.946	-0.0634092	0.0524159	0.0071955	-0.0218044	-0.0454314	-0.0800879	0.773182	0.89745	0.977871	0.8927	0.973626	0.761748
Rpl36a-ps1	3.54205e+06	0.957	1.058	1.074	0.994	0.92	0.967	-0.0634092	0.0813396	0.102994	-0.00868224	-0.120294	-0.0484122	0.961212	0.965376	0.94288	0.965941	0.942337	0.957028
Rims1	3.25755e+07	0.957	0.948	0.921	1.017	0.961	0.938	-0.0634092	-0.077041	-0.118727	0.0243197	-0.0573917	-0.0923402	0.885085	0.868234	0.802597	0.973529	0.989261	0.834202
Cdc42bpb	1.56799e+07	0.957	1.086	0.987	1.093	0.886	1.01	-0.0634092	0.119024	-0.018878	0.128293	-0.174621	0.0143553	0.898128	0.851431	0.973644	0.93141	0.812723	0.999853
Alyref	2.3609e+07	1.028	1.064	1.022	0.878	0.826	0.735	0.0398403	0.0894982	0.0313952	-0.187707	-0.275786	-0.444184	0.933702	0.901835	0.973644	0.433081	0.443529	0.00389868
Mtfr1l	2.26128e+07	0.957	1	0.936	1.125	0.939	1.057	-0.0634092	0	-0.0954196	0.169925	-0.0908029	0.0799754	0.892763	0.988767	0.863182	0.827225	0.959424	0.92228
Ptpn23	2.83889e+07	1.161	1.244	1.486	1.746	0.633	0.998	0.215368	0.314986	0.571434	0.804054	-0.659723	-0.00288828	0.17066	0.0856487	0.000347828	3.32858e-06	0.000538609	0.987967
Gria3	1.14444e+07	0.958	1.005	0.939	0.921	1.018	0.955	-0.0619024	0.0071955	-0.0908029	-0.118727	0.0257376	-0.0664274	0.898725	0.998187	0.886881	0.796638	0.964994	0.904823
Ilf3	8.46781e+06	0.958	0.859	0.791	1.044	0.945	0.959	-0.0619024	-0.21927	-0.33825	0.0621217	-0.0816138	-0.0603973	0.914941	0.386909	0.138575	0.999663	0.973626	0.921851
Gpc1	9.14017e+06	0.958	0.903	0.807	1.057	0.912	1.005	-0.0619024	-0.147202	-0.309359	0.0799754	-0.132894	0.0071955	0.924471	0.679282	0.270594	0.980449	0.880511	0.999853
Ogdhl	3.3594e+08	0.958	1.001	0.967	1.067	0.917	0.982	-0.0619024	0.00144197	-0.0484122	0.0935602	-0.125006	-0.0262051	0.704054	0.985969	0.939328	0.87692	0.677779	0.941263
Zc2hc1a	2.59588e+07	0.958	1	0.976	1.073	0.975	1.026	-0.0619024	0	-0.0350469	0.10165	-0.0365259	0.0370307	0.887352	0.989292	0.959937	0.969814	0.996985	0.985307
Slc30a1	3.51849e+06	0.958	1.137	1.094	1.078	0.937	0.98	-0.0619024	0.185232	0.129613	0.108357	-0.093879	-0.0291463	0.961262	0.894992	0.936361	0.987083	0.970986	0.968758
Rap1gap2	6.96946e+06	0.958	0.901	0.914	1.097	0.934	1.039	-0.0619024	-0.150401	-0.129734	0.133564	-0.0985055	0.0551957	0.94135	0.694194	0.843871	0.951771	0.958874	0.983544
Sarm1	1.26636e+06	0.958	0.855	0.819	1.1	0.853	0.879	-0.0619024	-0.226004	-0.288065	0.137504	-0.229382	-0.186065	0.961212	0.755311	0.634268	0.987083	0.887725	0.803106
G3bp1	1.21155e+07	0.958	1.118	1.077	1.127	0.857	0.941	-0.0619024	0.16092	0.107018	0.172488	-0.222633	-0.0877334	0.902885	0.720357	0.922975	0.866538	0.698337	0.858817
Pdap1	1.77077e+07	0.959	1.072	0.962	0.908	1.099	1.024	-0.0603973	0.100305	-0.0558912	-0.139236	0.136191	0.0342157	0.9241	0.8931	0.943445	0.511842	0.666442	0.986715
Sdhb	2.27504e+08	1.038	1.138	1.176	1.118	0.971	1.08	0.0538064	0.186501	0.233888	0.16092	-0.0424568	0.111031	0.853671	0.0378795	0.0976088	0.687574	0.980871	0.730518
Atp2b1	1.00792e+09	0.959	1.027	0.987	0.999	1.019	1.023	-0.0603973	0.0384362	-0.018878	-0.00144342	0.0271541	0.0328061	0.704054	0.895657	0.983175	0.940163	0.91502	0.982367
Pip4k2b	1.06852e+08	0.959	1.041	0.968	1.001	0.967	0.977	-0.0603973	0.0579701	-0.046921	0.00144197	-0.0484122	-0.0335695	0.795429	0.892609	0.955295	0.95925	0.973626	0.943203
Cmpk1	1.3728e+08	0.959	1.033	0.981	1.002	1.128	1.119	-0.0603973	0.0468403	-0.027675	0.00288251	0.173767	0.16221	0.762141	0.898166	0.973644	0.960526	0.240534	0.479474
Dtna	3.93759e+06	0.959	1.012	0.979	1.008	1.05	1.036	-0.0603973	0.0172093	-0.0306192	0.0114956	0.0703893	0.051024	0.961465	0.998945	0.974658	0.975728	0.942337	0.986715
Map6	1.5324e+09	0.959	1.008	0.973	1.022	0.928	0.958	-0.0603973	0.0114956	-0.0394883	0.0313952	-0.107803	-0.0619024	0.704054	0.964336	0.956005	0.99509	0.774642	0.839113
Src	2.58559e+08	0.959	0.985	0.944	1.051	0.936	0.976	-0.0603973	-0.0218044	-0.0831412	0.0717627	-0.0954196	-0.0350469	0.704054	0.978367	0.851013	0.940711	0.831974	0.921851
Aars	1.5639e+08	0.959	0.98	0.946	1.056	0.944	0.956	-0.0603973	-0.0291463	-0.0800879	0.0786098	-0.0831412	-0.0649175	0.73457	0.961548	0.868616	0.931239	0.910838	0.84621
Pef1	8.71889e+06	0.959	1.249	1.149	1.097	1.014	1.108	-0.0603973	0.320773	0.200379	0.133564	0.0200577	0.147958	0.939708	0.264208	0.777013	0.991683	0.962235	0.958363
Rnf214	689401	0.96	1.021	0.964	0.817	1.071	0.843	-0.0588937	0.0299829	-0.0528949	-0.291592	0.0989585	-0.246395	0.961212	0.998187	0.955382	0.750052	0.920738	0.79181
Phyhipl	1.05141e+08	0.96	0.996	0.958	0.901	1.107	1.013	-0.0588937	-0.00578235	-0.0619024	-0.150401	0.146655	0.0186342	0.800023	0.998187	0.931651	0.316301	0.360769	0.990797
Rps17	5.12821e+07	0.96	0.969	0.961	0.907	1.138	1.028	-0.0588937	-0.0454314	-0.0573917	-0.140826	0.186501	0.0398403	0.885085	0.919063	0.923356	0.417967	0.295001	0.970978
Rheb	3.39067e+07	0.96	1.027	0.989	0.921	1.033	0.939	-0.0588937	0.0384362	-0.0159576	-0.118727	0.0468403	-0.0908029	0.894717	0.958655	0.973644	0.552162	0.847595	0.858817
Dctn2	2.27125e+08	1.01	1.119	1.14	1.107	0.997	1.11	0.0143553	0.16221	0.189034	0.146655	-0.00433459	0.15056	0.98769	0.091621	0.263087	0.661634	0.972138	0.492849
Rab3gap1	1.67128e+07	0.96	0.94	0.926	0.929	1.073	0.913	-0.0588937	-0.0892673	-0.110916	-0.106249	0.10165	-0.131313	0.895937	0.881979	0.851013	0.715744	0.77162	0.706542
Farsa	8.57298e+07	0.96	0.983	0.941	0.936	0.993	0.948	-0.0588937	-0.0247367	-0.0877334	-0.0954196	-0.0101344	-0.077041	0.847928	0.961884	0.869404	0.599384	0.973626	0.839113
Lrrc59	2.01657e+07	0.96	0.912	0.853	0.939	0.96	0.919	-0.0588937	-0.132894	-0.229382	-0.0908029	-0.0588937	-0.121863	0.914461	0.690285	0.456631	0.727531	0.987609	0.751842
Dync1i1	2.70253e+07	0.96	0.93	0.889	0.944	0.976	0.909	-0.0588937	-0.104697	-0.169745	-0.0831412	-0.0350469	-0.137648	0.902885	0.745029	0.634268	0.711339	0.984255	0.660688
Srcin1	2.89875e+08	0.96	1.001	0.959	0.969	0.953	0.938	-0.0588937	0.00144197	-0.0603973	-0.0454314	-0.0694519	-0.0923402	0.704054	0.985698	0.917778	0.807785	0.924845	0.662064
Phf24	2.27237e+08	0.96	1.011	0.954	0.987	1.093	1.073	-0.0588937	0.015783	-0.0679388	-0.018878	0.128293	0.10165	0.704054	0.95354	0.894068	0.910524	0.440295	0.796779
Kif5c	1.59941e+08	0.96	0.968	0.948	0.99	0.995	0.991	-0.0588937	-0.046921	-0.077041	-0.0144996	-0.00723157	-0.013043	0.757271	0.904584	0.871095	0.906066	0.973626	0.964177
Snrpg	5.40705e+06	0.96	1.119	1.013	0.993	0.979	0.969	-0.0588937	0.16221	0.0186342	-0.0101344	-0.0306192	-0.0454314	0.961212	0.89745	0.992578	0.963385	0.993381	0.949394
Atp1b2	5.36576e+08	0.96	0.979	0.951	0.997	0.95	0.974	-0.0588937	-0.0306192	-0.0724828	-0.00433459	-0.0740006	-0.0380063	0.709016	0.959685	0.883269	0.932017	0.915555	0.907462
Septin8	2.69903e+08	0.96	1.007	0.962	1.012	0.998	1.012	-0.0588937	0.0100637	-0.0558912	0.0172093	-0.00288828	0.0172093	0.704054	0.968127	0.925916	0.980041	0.973626	0.999548
Calr	4.8154e+08	0.96	1.025	0.972	1.013	0.959	0.97	-0.0588937	0.0356239	-0.0409718	0.0186342	-0.0603973	-0.0439433	0.709658	0.898166	0.955295	0.984082	0.944926	0.890778
Grk2	2.54206e+07	0.96	1.03	1.006	1.02	0.99	0.953	-0.0588937	0.0426443	0.00863031	0.0285692	-0.0144996	-0.0694519	0.894717	0.968127	0.99772	0.974391	0.973626	0.901509
Them4	4.06149e+07	0.96	1	0.978	1.031	1.122	1.137	-0.0588937	0	-0.0320936	0.0440443	0.166073	0.185232	0.881486	0.998945	0.959937	0.999663	0.384107	0.506825
Copa	3.85418e+07	0.96	1.11	1.042	1.042	0.989	1.001	-0.0588937	0.15056	0.0593553	0.0593553	-0.0159576	0.00144197	0.89008	0.570174	0.955295	0.996897	0.964895	0.995069
Aldh9a1	4.66825e+07	0.96	0.983	0.957	1.047	0.965	1.02	-0.0588937	-0.0247367	-0.0634092	0.0662614	-0.0513992	0.0285692	0.881486	0.96315	0.915769	0.986587	0.991332	0.986331
Gucy1a2	1.23898e+07	0.96	1.089	1.023	1.048	0.893	0.948	-0.0588937	0.123004	0.0328061	0.0676387	-0.163268	-0.077041	0.90964	0.85696	0.987118	0.994798	0.874705	0.890778
Nap1l1	1.05479e+08	0.96	1.024	1.007	1.066	0.896	0.953	-0.0588937	0.0342157	0.0100637	0.0922074	-0.158429	-0.0694519	0.799367	0.938799	0.977423	0.920509	0.673974	0.862446
Atcay	5.78555e+07	0.96	1.056	1.03	1.104	0.942	1.066	-0.0588937	0.0786098	0.0426443	0.14274	-0.086201	0.0922074	0.877918	0.848168	0.955295	0.800669	0.960968	0.871314
Upf1	1.71033e+07	0.96	0.922	0.885	1.177	1.037	1.226	-0.0588937	-0.117161	-0.176251	0.235114	0.0524159	0.293959	0.92184	0.770402	0.667116	0.687736	0.929869	0.200324
Mon2	2.87849e+06	0.96	0.983	0.925	1.234	0.884	1.084	-0.0588937	-0.0247367	-0.112475	0.303342	-0.177882	0.116365	0.961212	0.969211	0.890828	0.848058	0.923344	0.95065
Anp32b	8.74514e+06	0.961	0.929	0.868	0.843	1.16	0.962	-0.0573917	-0.106249	-0.204233	-0.246395	0.214125	-0.0558912	0.951481	0.854015	0.634268	0.312734	0.465598	0.930289
Sub1	6.64811e+07	0.961	1.163	1.078	0.9	0.965	0.921	-0.0573917	0.217851	0.108357	-0.152003	-0.0513992	-0.118727	0.882364	0.12971	0.749487	0.323913	0.997369	0.69874
Slc24a4	5.18674e+06	0.961	1.003	0.952	1.008	0.998	1.004	-0.0573917	0.00432161	-0.0709665	0.0114956	-0.00288828	0.00575927	0.961465	0.988849	0.947388	0.977342	0.98607	0.986715
Rtn3	4.58554e+08	0.961	1.002	0.964	1.021	0.937	0.955	-0.0573917	0.00288251	-0.0528949	0.0299829	-0.093879	-0.0664274	0.728487	0.982356	0.933901	0.994671	0.83579	0.817687
Actc1	2.1803e+09	0.961	1.059	1.032	1.061	1.07	1.083	-0.0573917	0.0827026	0.045443	0.0854247	0.0976108	0.115033	0.726462	0.584329	0.92254	0.907286	0.584797	0.708922
Dock4	1.73006e+07	0.961	1.26	1.225	1.075	0.956	1.078	-0.0573917	0.333424	0.292782	0.104337	-0.0649175	0.108357	0.898128	0.131676	0.363946	0.959046	0.979829	0.876834
Clptm1	1.00944e+07	0.961	1.032	0.939	1.079	0.876	1	-0.0573917	0.045443	-0.0908029	0.109695	-0.190997	0	0.939912	0.980101	0.896729	0.966324	0.814274	0.986715
Rpl8	6.29747e+07	0.961	1.013	0.971	1.081	0.893	0.965	-0.0573917	0.0186342	-0.0424568	0.112367	-0.163268	-0.0513992	0.884525	0.976817	0.961997	0.899697	0.716493	0.921851
Adk	2.82424e+07	0.961	1.117	1.107	1.083	0.944	0.977	-0.0573917	0.159629	0.146655	0.115033	-0.0831412	-0.0335695	0.902885	0.543716	0.785814	0.945859	0.958874	0.95009
Prkca	3.78897e+07	0.961	0.916	0.834	1.142	0.837	0.965	-0.0573917	-0.12658	-0.261881	0.191563	-0.2567	-0.0513992	0.894717	0.575177	0.207205	0.544397	0.217503	0.901509
Fam98b	1.59193e+06	0.961	1.206	1.216	1.653	0.682	0.966	-0.0573917	0.27023	0.282143	0.725087	-0.552156	-0.0499049	0.961212	0.787604	0.831587	0.339364	0.491804	0.949394
Cacnb4	3.24946e+07	0.962	0.964	0.935	0.955	1.056	1.007	-0.0558912	-0.0528949	-0.0969617	-0.0664274	0.0786098	0.0100637	0.910237	0.915231	0.854106	0.767552	0.714152	0.999853
Pmm1	1.62319e+07	0.962	0.937	0.902	0.962	1.028	1.004	-0.0558912	-0.093879	-0.148801	-0.0558912	0.0398403	0.00575927	0.914535	0.854015	0.762844	0.864543	0.942019	0.986715
Dgki	2.28927e+07	0.962	1.078	1.019	0.976	0.981	0.969	-0.0558912	0.108357	0.0271541	-0.0350469	-0.027675	-0.0454314	0.90964	0.848168	0.982523	0.866538	0.979204	0.946024
Hyou1	7.53341e+07	0.962	1.014	0.978	1.061	0.964	1.029	-0.0558912	0.0200577	-0.0320936	0.0854247	-0.0528949	0.041243	0.859277	0.975037	0.969961	0.940711	0.973626	0.969725
Snd1	2.27881e+07	0.962	1.083	1.03	1.062	0.924	0.987	-0.0558912	0.115033	0.0426443	0.0867838	-0.114035	-0.018878	0.902885	0.800124	0.968695	0.974593	0.924845	0.981144
Slk	6.36563e+06	0.962	0.849	0.812	1.062	1.069	1.22	-0.0558912	-0.236164	-0.300448	0.0867838	0.0962619	0.286881	0.961465	0.461043	0.419769	0.987083	0.900091	0.390016
Ssb	2.98419e+07	0.962	0.988	0.954	1.065	0.945	1.049	-0.0558912	-0.0174171	-0.0679388	0.0908534	-0.0816138	0.0690147	0.904283	0.969211	0.915769	0.974593	0.972041	0.931788
Ppid	1.14171e+08	0.962	0.956	0.933	1.068	0.962	1.028	-0.0558912	-0.0649175	-0.100051	0.0949116	-0.0558912	0.0398403	0.81897	0.883232	0.831188	0.902013	0.970428	0.95009
Rps21	4.15042e+07	0.962	1.077	1.018	1.074	0.942	1.007	-0.0558912	0.107018	0.0257376	0.102994	-0.086201	0.0100637	0.892151	0.744029	0.983175	0.935042	0.958874	0.999853
Mrpl23	5.99943e+06	0.962	0.922	0.907	1.114	0.946	1.075	-0.0558912	-0.117161	-0.140826	0.155749	-0.0800879	0.104337	0.961356	0.855058	0.836026	0.960526	0.964994	0.963503
Rpl18a	3.28465e+07	0.962	1.06	0.993	1.191	0.873	1.002	-0.0558912	0.0840643	-0.0101344	0.252173	-0.195946	0.00288251	0.905504	0.881979	0.979709	0.458173	0.657875	0.999548
Akt1	4.07126e+06	0.962	0.966	0.915	1.197	1.042	1.222	-0.0558912	-0.0499049	-0.128156	0.259423	0.0593553	0.289244	0.961465	0.949926	0.888312	0.800669	0.94865	0.457458
Copg2	2.66685e+06	0.962	1.339	1.319	1.304	0.79	1.021	-0.0558912	0.421156	0.399445	0.382944	-0.340075	0.0299829	0.962911	0.439199	0.515458	0.756176	0.708132	0.999548
Metap1	2.68204e+06	0.963	1.021	0.867	0.905	1.126	0.981	-0.0543923	0.0299829	-0.205896	-0.14401	0.171207	-0.027675	0.964629	0.998478	0.744184	0.866538	0.81627	0.972461
Ermn	1.55562e+07	0.963	1.146	1.068	0.952	0.999	0.888	-0.0543923	0.196607	0.0949116	-0.0709665	-0.00144342	-0.171368	0.908478	0.585711	0.922975	0.836362	0.972041	0.552992
Afdn	6.10757e+06	0.963	0.974	0.925	0.982	0.999	0.991	-0.0543923	-0.0380063	-0.112475	-0.0262051	-0.00144342	-0.013043	0.961465	0.952657	0.874362	0.93052	0.982004	0.968101
Fasn	4.8647e+08	0.963	0.974	0.945	0.985	0.955	0.957	-0.0543923	-0.0380063	-0.0816138	-0.0218044	-0.0664274	-0.0634092	0.746368	0.940341	0.853002	0.877344	0.932308	0.836089
Pafah1b1	1.91358e+08	0.963	1.032	0.981	0.987	0.945	0.927	-0.0543923	0.045443	-0.027675	-0.018878	-0.0816138	-0.109359	0.752715	0.862994	0.973644	0.893141	0.887725	0.556813
Rps2	1.3785e+08	0.963	0.998	0.961	1.016	0.863	0.887	-0.0543923	-0.00288828	-0.0573917	0.0229004	-0.212568	-0.172994	0.805447	0.998945	0.923434	0.987083	0.285543	0.304214
Ganab	8.11071e+07	0.963	0.964	0.947	1.026	0.988	1.003	-0.0543923	-0.0528949	-0.0785637	0.0370307	-0.0174171	0.00432161	0.863623	0.901086	0.885573	0.999663	0.976709	0.992671
Scrn1	2.20977e+08	0.963	1.006	0.963	1.032	0.936	0.956	-0.0543923	0.00863031	-0.0543923	0.045443	-0.0954196	-0.0649175	0.745313	0.969211	0.929657	0.99149	0.840309	0.822908
Ppp3cb	9.49593e+07	0.963	1.072	1.069	1.048	1.067	1.135	-0.0543923	0.100305	0.0962619	0.0676387	0.0935602	0.182692	0.855108	0.693096	0.794714	0.963385	0.665233	0.323507
Macrod1	2.94053e+07	0.963	1.162	1.126	1.065	1.011	1.086	-0.0543923	0.21661	0.171207	0.0908534	0.015783	0.119024	0.908819	0.318824	0.671876	0.974391	0.944926	0.851451
Daam1	4.23836e+06	0.963	1.098	1.037	1.084	0.75	0.867	-0.0543923	0.134878	0.0524159	0.116365	-0.415037	-0.205896	0.968461	0.919826	0.972199	0.984082	0.480265	0.707881
Adap1	5.2007e+07	0.963	0.961	0.927	1.148	0.903	1.091	-0.0543923	-0.0573917	-0.109359	0.199123	-0.147202	0.125651	0.888734	0.896839	0.803628	0.606585	0.843197	0.795721
Tom1	7.80201e+06	0.999	0.982	0.953	1.807	0.638	1.106	-0.00144342	-0.0262051	-0.0694519	0.853597	-0.648372	0.145351	0.99982	0.96554	0.923829	0.000474252	0.00859814	0.853156
Stx7	9.70777e+06	0.964	1.22	1.117	0.841	1.033	0.906	-0.0528949	0.286881	0.159629	-0.249822	0.0468403	-0.142417	0.955985	0.347277	0.871095	0.746249	0.958874	0.798416
Ube2m	7.17043e+07	0.964	0.932	0.917	0.881	1.117	0.973	-0.0528949	-0.101598	-0.125006	-0.182786	0.159629	-0.0394883	0.881775	0.681154	0.736011	0.190687	0.375694	0.941263
Aldh2	2.87852e+08	0.964	0.974	0.941	0.892	1.068	0.952	-0.0528949	-0.0380063	-0.0877334	-0.164884	0.0949116	-0.0709665	0.76788	0.938799	0.842502	0.153491	0.593542	0.797375
Ppp1r9a	4.19855e+07	0.964	0.88	0.862	0.96	1.071	1.064	-0.0528949	-0.184425	-0.21424	-0.0588937	0.0989585	0.0894982	0.898128	0.243139	0.38964	0.784461	0.673974	0.890011
Dclk1	2.45102e+08	0.964	1.008	0.963	0.965	1.036	1.009	-0.0528949	0.0114956	-0.0543923	-0.0513992	0.051024	0.0129262	0.758092	0.964336	0.928757	0.786561	0.817328	0.999548
Septin5	9.96047e+08	0.964	1.078	1.055	0.973	1.138	1.119	-0.0528949	0.108357	0.077243	-0.0394883	0.186501	0.16221	0.759358	0.383296	0.840235	0.827225	0.11598	0.408426
Ostf1	720387	0.964	0.969	0.9	0.973	1.112	1.046	-0.0528949	-0.0454314	-0.152003	-0.0394883	0.153157	0.0648829	0.96641	0.969211	0.890486	0.927195	0.86554	0.999548
Stip1	3.78504e+08	0.964	1.032	1.014	0.976	1.046	1.032	-0.0528949	0.045443	0.0200577	-0.0350469	0.0648829	0.045443	0.766412	0.868287	0.96793	0.851741	0.76177	0.957028
Oxr1	2.82999e+08	0.964	0.992	0.946	0.982	1.025	1.01	-0.0528949	-0.011588	-0.0800879	-0.0262051	0.0356239	0.0143553	0.764275	0.998187	0.858484	0.866538	0.886966	0.999853
Pdia3	5.38036e+08	0.964	1.011	0.971	0.997	0.904	0.913	-0.0528949	0.015783	-0.0424568	-0.00433459	-0.145605	-0.131313	0.76788	0.95354	0.953296	0.93159	0.571155	0.4258
Hnrnpk	6.79417e+08	0.964	1.021	0.983	1.006	0.956	0.964	-0.0528949	0.0299829	-0.0247367	0.00863031	-0.0649175	-0.0528949	0.758092	0.904584	0.973644	0.963385	0.93416	0.874676
Prdx6	6.02861e+08	1.063	1.12	1.149	1.17	0.867	1.034	0.0881416	0.163499	0.200379	0.226509	-0.205896	0.0482362	0.612293	0.0884076	0.20898	0.186454	0.219952	0.95009
Syt7	5.39785e+07	0.964	0.923	0.92	1.026	0.858	0.874	-0.0528949	-0.115597	-0.120294	0.0370307	-0.22095	-0.194295	0.894717	0.596694	0.7543	0.994798	0.462158	0.32884
Rab3b	2.47668e+07	0.964	1.013	0.981	1.058	0.801	0.882	-0.0528949	0.0186342	-0.027675	0.0813396	-0.320126	-0.181149	0.909795	0.998187	0.961997	0.987083	0.172489	0.48399
Septin2	3.55352e+07	0.964	1.002	1.003	1.141	1.097	1.213	-0.0528949	0.00288251	0.00432161	0.190299	0.133564	0.27858	0.904283	0.998961	0.995853	0.738935	0.53846	0.153293
Atp6v1g1	3.27658e+07	0.964	1.041	0.973	1.237	1.237	1.272	-0.0528949	0.0579701	-0.0394883	0.306846	0.306846	0.347099	0.91163	0.923271	0.955295	0.609705	0.245864	0.347411
Ubxn1	1.61491e+06	0.964	1.207	1.091	1.646	0.577	0.934	-0.0528949	0.271426	0.125651	0.718964	-0.793357	-0.0985055	0.961465	0.782923	0.961997	0.37435	0.136278	0.903281
Tsc22d1	476327	0.965	0.891	0.824	0.743	1.508	1.121	-0.0513992	-0.166503	-0.279284	-0.428566	0.592636	0.164786	0.972794	0.901835	0.794163	0.582915	0.330197	0.957028
Atg2b	696436	0.965	1.035	1.036	0.916	1.214	1.018	-0.0513992	0.0496308	0.051024	-0.12658	0.279768	0.0257376	0.970221	0.999791	0.999911	0.892403	0.745767	0.989044
Cd200	1.53559e+08	0.965	0.949	0.931	0.938	1.106	1.012	-0.0513992	-0.07552	-0.103147	-0.0923402	0.145351	0.0172093	0.798441	0.784025	0.785836	0.62227	0.356658	0.986715
Sez6l2	2.49127e+06	0.965	1.005	0.989	0.958	1.101	1.069	-0.0513992	0.0071955	-0.0159576	-0.0619024	0.138814	0.0962619	0.968501	0.998109	0.971178	0.933778	0.847375	0.972461
Pitpnm2	1.2707e+07	0.965	0.98	0.942	0.982	1.065	1.017	-0.0513992	-0.0291463	-0.086201	-0.0262051	0.0908534	0.0243197	0.924471	0.960259	0.894068	0.930527	0.880846	0.999548
Myo5a	6.49803e+08	0.965	0.936	0.906	0.984	0.961	0.937	-0.0513992	-0.0954196	-0.142417	-0.0232698	-0.0573917	-0.093879	0.77021	0.620031	0.584473	0.871229	0.951807	0.653915
Aak1	4.4952e+08	0.965	0.999	0.957	0.992	0.99	1.001	-0.0513992	-0.00144342	-0.0634092	-0.011588	-0.0144996	0.00144197	0.77021	0.989292	0.909354	0.919106	0.985431	0.986592
St13	2.28746e+08	0.965	1.017	0.987	0.996	0.897	0.906	-0.0513992	0.0243197	-0.018878	-0.00578235	-0.15682	-0.142417	0.77021	0.927868	0.980857	0.928936	0.500747	0.356787
Psmc1	5.6288e+07	0.965	0.984	0.967	1.008	0.912	0.943	-0.0513992	-0.0232698	-0.0484122	0.0114956	-0.132894	-0.0846703	0.894717	0.966572	0.939328	0.960384	0.885039	0.853156
Snrpd2	1.99631e+07	1.342	1.003	1.33	1.449	0.641	0.913	0.424385	0.00432161	0.411426	0.535058	-0.641604	-0.131313	0.00234779	0.998187	0.0718206	0.0228035	0.00582106	0.70953
Reep1	6.4226e+06	0.965	0.958	0.894	1.026	0.911	0.946	-0.0513992	-0.0619024	-0.161653	0.0370307	-0.134477	-0.0800879	0.970221	0.921831	0.785836	0.992251	0.944532	0.901509
Psmd1	6.16056e+07	0.965	1.051	1.031	1.094	0.826	0.924	-0.0513992	0.0717627	0.0440443	0.129613	-0.275786	-0.114035	0.894717	0.888085	0.932989	0.853768	0.248516	0.720525
Cep170	1.29755e+06	0.965	0.978	0.925	1.116	0.958	1.118	-0.0513992	-0.0320936	-0.112475	0.158337	-0.0619024	0.16092	0.974799	0.983954	0.888102	0.960526	0.991332	0.910449
Uggt1	7.09637e+06	0.965	1.109	1.171	1.386	0.709	1.062	-0.0513992	0.149259	0.227741	0.470927	-0.496142	0.0867838	0.968509	0.882596	0.731946	0.381923	0.122322	0.953766
Castor2	2.4718e+06	0.966	1.117	0.94	0.858	1.032	0.89	-0.0499049	0.159629	-0.0892673	-0.22095	0.045443	-0.168123	0.970221	0.904584	0.922975	0.782636	0.952109	0.810024
Ppib	7.85051e+07	0.966	1.005	0.959	0.967	0.986	0.956	-0.0499049	0.0071955	-0.0603973	-0.0484122	-0.0203404	-0.0649175	0.885085	0.998109	0.928343	0.830276	0.982469	0.876834
Acap2	6.31336e+06	0.966	1.018	0.997	0.978	0.937	0.858	-0.0499049	0.0257376	-0.00433459	-0.0320936	-0.093879	-0.22095	0.970744	0.998187	0.977871	0.946601	0.952109	0.574727
Scamp3	1.29182e+07	0.966	0.969	0.911	0.991	0.966	0.937	-0.0499049	-0.0454314	-0.134477	-0.013043	-0.0499049	-0.093879	0.932776	0.934668	0.802597	0.919329	0.98607	0.849144
Capza1	6.54415e+06	0.966	1.026	0.979	1.015	0.986	1.059	-0.0499049	0.0370307	-0.0306192	0.0214797	-0.0203404	0.0827026	0.970221	0.988767	0.965994	0.975399	0.978138	0.943203
Diras2	1.43831e+08	0.966	1.022	0.982	1.022	0.931	0.973	-0.0499049	0.0313952	-0.0262051	0.0313952	-0.103147	-0.0394883	0.81897	0.934736	0.973644	0.994453	0.839234	0.922219
Ddb1	9.00744e+07	0.966	1.006	0.991	1.044	0.929	0.953	-0.0499049	0.00863031	-0.013043	0.0621217	-0.106249	-0.0694519	0.877711	0.989292	0.993043	0.981948	0.849799	0.864002
Gad1	7.52053e+07	0.966	0.946	0.936	1.058	0.874	0.946	-0.0499049	-0.0800879	-0.0954196	0.0813396	-0.194295	-0.0800879	0.887352	0.791183	0.846623	0.946904	0.497088	0.858196
Tecpr1	1.3021e+07	0.966	1.092	1.062	1.07	1.036	1.071	-0.0499049	0.126973	0.0867838	0.0976108	0.051024	0.0989585	0.926456	0.848168	0.938514	0.974391	0.931062	0.901509
Sorbs1	8.90048e+06	0.966	1.04	1.038	1.103	1.019	1.098	-0.0499049	0.0565835	0.0538064	0.141433	0.0271541	0.134878	0.943753	0.966572	0.974658	0.920509	0.944926	0.858817
Sv2a	6.004e+08	0.966	1.03	1.014	1.11	0.89	0.997	-0.0499049	0.0426443	0.0200577	0.15056	-0.168123	-0.00433459	0.784091	0.882694	0.968554	0.634887	0.433795	0.982367
Nt5c2	4.01969e+06	1.083	1.231	1.319	1.496	0.643	0.947	0.115033	0.299831	0.399445	0.58111	-0.637109	-0.0785637	0.884525	0.620653	0.431739	0.37104	0.0892183	0.908938
Tubb2b	8.20089e+07	1.323	1.1	1.69	2.03	0.331	0.738	0.403813	0.137504	0.757023	1.02148	-1.5951	-0.438307	6.28535e-06	0.51057	3.42132e-11	2.67297e-16	2.21282e-16	2.35447e-05
Arhgdia	5.27644e+08	0.996	1.128	1.15	1.066	1.019	1.108	-0.00578235	0.173767	0.201634	0.0922074	0.0271541	0.147958	0.972063	0.0616251	0.203342	0.880818	0.915555	0.508668
Maip1	2.78029e+06	0.966	1.171	1.065	1.381	0.72	1.003	-0.0499049	0.227741	0.0908534	0.465713	-0.473931	0.00432161	0.970221	0.848168	0.968789	0.608608	0.374031	0.986715
Opa3	1.22662e+07	0.967	1.082	1.138	0.89	1.006	0.808	-0.0484122	0.1137	0.186501	-0.168123	0.00863031	-0.307573	0.939912	0.895657	0.782833	0.734409	0.973626	0.170883
Mtmr9	2.78526e+06	0.967	1.072	0.978	0.926	1.083	1.008	-0.0484122	0.100305	-0.0320936	-0.110916	0.115033	0.0114956	0.970734	0.9619	0.961997	0.87739	0.888609	0.984371
Ywhaq	6.40146e+08	0.975	1.195	1.179	1.125	1.01	1.149	-0.0365259	0.257011	0.237564	0.169925	0.0143553	0.200379	0.855108	0.00118341	0.08882	0.516778	0.944926	0.198951
Gnb5	1.76017e+08	0.967	0.975	0.965	0.96	0.928	0.889	-0.0484122	-0.0365259	-0.0513992	-0.0588937	-0.107803	-0.169745	0.788535	0.943315	0.931651	0.799546	0.827021	0.310623
Actn4	2.12114e+08	0.967	0.958	0.942	0.965	1.039	1.018	-0.0484122	-0.0619024	-0.086201	-0.0513992	0.0551957	0.0257376	0.792133	0.874241	0.843871	0.79074	0.789623	0.986715
Gldc	3.58627e+06	1.121	1.01	1.128	1.407	0.645	0.943	0.164786	0.0143553	0.173767	0.492622	-0.632629	-0.0846703	0.723945	0.998961	0.858484	0.354705	0.0362321	0.890778
Tpd52	2.50758e+07	0.967	1.044	0.998	1.023	0.991	1.007	-0.0484122	0.0621217	-0.00288828	0.0328061	-0.013043	0.0100637	0.926389	0.932059	0.989372	0.979714	0.973626	0.999853
Sv2c	2.64579e+06	0.967	1.12	1.127	1.073	1.061	1.042	-0.0484122	0.163499	0.172488	0.10165	0.0854247	0.0593553	0.970221	0.90916	0.915769	0.994798	0.929869	0.999853
Arl15	5.04006e+06	0.967	1.032	1.004	1.213	0.957	1.065	-0.0484122	0.045443	0.00575927	0.27858	-0.0634092	0.0908534	0.970624	0.982356	0.992085	0.601471	0.973626	0.929375
Ptgr2	2.34884e+06	0.967	0.985	0.989	1.274	1.177	1.314	-0.0484122	-0.0218044	-0.0159576	0.349365	0.235114	0.393965	0.970624	0.980516	0.966763	0.746249	0.711726	0.446075
Rplp2	1.38228e+08	0.968	1.005	0.966	0.924	1.105	1.024	-0.046921	0.0071955	-0.0499049	-0.114035	0.144046	0.0342157	0.855108	0.982497	0.941501	0.480828	0.305471	0.970218
Slc12a5	5.91478e+08	0.968	0.955	0.922	0.967	0.989	0.962	-0.046921	-0.0664274	-0.117161	-0.0484122	-0.0159576	-0.0558912	0.796018	0.846243	0.702743	0.795771	0.988875	0.864002
Nptn	7.04494e+08	0.968	1.011	0.998	0.97	0.963	0.926	-0.046921	0.015783	-0.00288828	-0.0439433	-0.0543923	-0.110916	0.799037	0.952657	0.996138	0.813587	0.954572	0.54809
Sft2d2	402314	0.968	1.094	1.065	0.977	0.994	0.984	-0.046921	0.129613	0.0908534	-0.0335695	-0.00868224	-0.0232698	0.978997	0.97273	0.994946	0.952431	0.968429	0.977176
P4hb	1.16771e+08	0.968	1.064	1.022	0.984	1.107	1.08	-0.046921	0.0894982	0.0313952	-0.0232698	0.146655	0.111031	0.85209	0.700669	0.95288	0.8927	0.37918	0.784493
Ahcyl1	1.02849e+09	0.968	0.971	0.95	0.986	1.008	0.981	-0.046921	-0.0424568	-0.0740006	-0.0203404	0.0114956	-0.027675	0.798441	0.927228	0.87948	0.884587	0.949809	0.933557
Atp1a3	1.97706e+10	0.968	0.977	0.953	0.989	1.006	1.001	-0.046921	-0.0335695	-0.0694519	-0.0159576	0.00863031	0.00144197	0.798441	0.952657	0.891288	0.904643	0.954254	0.986715
Cacna2d1	2.49911e+08	0.968	0.964	0.929	1.015	0.964	0.989	-0.046921	-0.0528949	-0.106249	0.0214797	-0.0528949	-0.0159576	0.795429	0.899853	0.76229	0.987083	0.958874	0.957899
Grin2b	3.88794e+07	0.968	0.953	0.928	1.045	0.908	0.949	-0.046921	-0.0694519	-0.107803	0.0635029	-0.139236	-0.07552	0.916798	0.854036	0.823666	0.982406	0.774059	0.868567
Lhpp	4.1602e+06	0.968	1.34	1.283	1.045	0.638	0.938	-0.046921	0.422233	0.359521	0.0635029	-0.648372	-0.0923402	0.972794	0.326995	0.457387	0.999663	0.106735	0.890011
Abr	6.23667e+07	0.968	0.995	0.961	1.067	1.035	1.095	-0.046921	-0.00723157	-0.0573917	0.0935602	0.0496308	0.130931	0.905504	0.988849	0.933901	0.93052	0.869768	0.736774
Atp6v1e1	3.30809e+08	1.031	1.129	1.143	0.927	1.021	0.932	0.0440443	0.175045	0.192825	-0.109359	0.0299829	-0.101598	0.892042	0.0576429	0.244853	0.534955	0.900091	0.696479
Dnajb11	5.78748e+06	0.78	1.158	0.867	0.797	1.047	0.738	-0.358454	0.211635	-0.205896	-0.327348	0.0662614	-0.438307	0.212694	0.716631	0.744379	0.167808	0.915749	0.028222
Pgs1	1.30997e+06	0.968	0.953	0.915	1.576	0.688	1.093	-0.046921	-0.0694519	-0.128156	0.656268	-0.53952	0.128293	0.972794	0.96315	0.892055	0.468645	0.612348	0.972461
Cdc42ep4	5.61121e+06	0.969	1.107	1.005	0.872	0.959	0.845	-0.0454314	0.146655	0.0071955	-0.1976	-0.0603973	-0.242977	0.974085	0.893144	0.99772	0.687736	0.973626	0.51626
Hspa2	7.6927e+07	0.969	0.946	0.922	0.934	1.033	0.953	-0.0454314	-0.0800879	-0.117161	-0.0985055	0.0468403	-0.0694519	0.894717	0.798062	0.77241	0.58589	0.83668	0.871173
Glul	2.55188e+09	0.969	0.965	0.941	0.948	1.064	1.027	-0.0454314	-0.0513992	-0.0877334	-0.077041	0.0894982	0.0384362	0.805447	0.901835	0.840235	0.655491	0.622279	0.972006
Grm5	3.84665e+07	0.969	0.973	0.873	1.025	0.919	0.927	-0.0454314	-0.0394883	-0.195946	0.0356239	-0.121863	-0.109359	0.924471	0.93468	0.518706	0.987083	0.904941	0.760163
Ca4	9.43044e+06	0.969	0.963	0.942	1.033	0.887	0.949	-0.0454314	-0.0543923	-0.086201	0.0468403	-0.172994	-0.07552	0.946758	0.932607	0.896975	0.9931	0.838573	0.882512
Phpt1	1.20903e+07	0.95	1.006	0.936	0.83	1.223	0.929	-0.0740006	0.00863031	-0.0954196	-0.268817	0.290424	-0.106249	0.887352	0.998945	0.881106	0.095712	0.127996	0.803444
Slc32a1	7.32732e+07	0.969	1.042	1.039	1.135	0.861	0.964	-0.0454314	0.0593553	0.0551957	0.182692	-0.215915	-0.0528949	0.894717	0.901835	0.914931	0.647655	0.430963	0.920008
Hnrnpa3	3.73514e+08	0.969	0.98	0.931	1.163	0.946	1.135	-0.0454314	-0.0291463	-0.103147	0.217851	-0.0800879	0.182692	0.805197	0.96315	0.777622	0.22748	0.889412	0.290128
Arf4	6.81405e+06	0.969	1.163	1.363	1.349	0.797	1.094	-0.0454314	0.217851	0.446786	0.43189	-0.327348	0.129613	0.961212	0.622625	0.183134	0.187782	0.433795	0.901509
Calml3	846071	0.969	1.416	1.58	1.361	0.706	1.245	-0.0454314	0.501821	0.659925	0.444667	-0.50226	0.316146	0.978332	0.340335	0.273386	0.866538	0.75672	0.812694
Dbnl	8.38375e+07	0.97	1.031	0.997	0.968	1.066	1.008	-0.0439433	0.0440443	-0.00433459	-0.046921	0.0922074	0.0114956	0.894717	0.927868	0.997892	0.829577	0.677918	0.999853
Gfm1	3.3994e+06	0.97	0.992	0.995	0.992	0.922	0.935	-0.0439433	-0.011588	-0.00723157	-0.011588	-0.117161	-0.0969617	0.982125	0.97273	0.977871	0.971106	0.952109	0.901509
Actr3	3.64966e+08	0.97	0.981	0.952	1.008	0.956	0.961	-0.0439433	-0.027675	-0.0709665	0.0114956	-0.0649175	-0.0573917	0.80612	0.966572	0.885573	0.967247	0.933686	0.858817
Cndp2	1.15704e+08	0.97	1.054	1.061	1.015	0.947	1.016	-0.0439433	0.0758749	0.0854247	0.0214797	-0.0785637	0.0229004	0.879406	0.801123	0.823666	0.987083	0.93416	0.985307
Ogdh	9.58098e+08	0.97	0.999	0.97	1.028	0.948	0.983	-0.0439433	-0.00144342	-0.0439433	0.0398403	-0.077041	-0.0247367	0.809846	0.989292	0.949881	0.994798	0.904843	0.942982
Camk1d	7.00152e+07	0.97	1.107	1.093	1.03	0.957	0.973	-0.0439433	0.146655	0.128293	0.0426443	-0.0634092	-0.0394883	0.914535	0.465974	0.662844	0.994798	0.958874	0.929375
Tpt1	2.00779e+08	0.97	0.894	0.872	1.037	1.044	1.094	-0.0439433	-0.161653	-0.1976	0.0524159	0.0621217	0.129613	0.806076	0.156293	0.279707	0.981906	0.774642	0.608872
Hacd3	4.34029e+07	0.97	0.931	0.939	1.081	0.813	0.913	-0.0439433	-0.103147	-0.0908029	0.112367	-0.298673	-0.131313	0.928609	0.688133	0.856346	0.887074	0.174184	0.62675
Grb2	2.572e+07	0.97	1.165	1.117	1.082	0.979	1.135	-0.0439433	0.22033	0.159629	0.1137	-0.0306192	0.182692	0.931664	0.300405	0.702743	0.947602	0.996727	0.64249
Ldha	2.22775e+09	0.97	1.007	0.979	1.102	0.939	1.033	-0.0439433	0.0100637	-0.0306192	0.140124	-0.0908029	0.0468403	0.807187	0.966572	0.968695	0.704002	0.855118	0.953045
	2.27269e+07	0.97	1.115	1.096	1.153	0.848	0.975	-0.0439433	0.157044	0.132248	0.205393	-0.237864	-0.0365259	0.939317	0.650384	0.833876	0.690013	0.509016	0.953113
Camsap2	994133	0.97	1.073	1.025	1.254	0.84	0.93	-0.0439433	0.10165	0.0356239	0.326537	-0.251539	-0.104697	0.970624	0.95834	0.993528	0.809149	0.886966	0.901509
Pkia	787715	0.971	0.906	0.922	0.897	1.109	1.037	-0.0424568	-0.142417	-0.117161	-0.15682	0.149259	0.0524159	0.97244	0.900434	0.915769	0.855327	0.885039	0.999853
Hspa5	5.28766e+08	0.971	0.942	0.917	0.926	1.082	1.015	-0.0424568	-0.086201	-0.125006	-0.110916	0.1137	0.0214797	0.81897	0.7061	0.671876	0.432634	0.47557	0.988766
Mindy2	800594	0.971	0.937	0.875	0.937	1.056	1.015	-0.0424568	-0.093879	-0.192645	-0.093879	0.0786098	0.0214797	0.978235	0.943315	0.877766	0.888284	0.930405	0.986715
Abi1	1.55763e+08	0.971	1.028	0.984	0.942	1.041	0.977	-0.0424568	0.0398403	-0.0232698	-0.086201	0.0579701	-0.0335695	0.836261	0.901835	0.973644	0.594857	0.789415	0.922219
Atp5po	4.3269e+08	0.978	1.134	1.117	1.025	1.021	1.009	-0.0320936	0.181421	0.159629	0.0356239	0.0299829	0.0129262	0.883263	0.0458272	0.411571	0.999148	0.904941	0.999853
Rpl28	1.91181e+07	0.971	0.956	0.904	0.973	1.061	0.953	-0.0424568	-0.0649175	-0.145605	-0.0394883	0.0854247	-0.0694519	0.961212	0.901835	0.76229	0.866538	0.815341	0.890011
Sgtb	4.37452e+06	0.971	1.041	1.055	0.981	1.009	1.027	-0.0424568	0.0579701	0.077243	-0.027675	0.0129262	0.0384362	0.97582	0.987361	0.959396	0.935042	0.960538	0.989425
Actr1a	7.33675e+07	0.971	1.111	1.103	0.99	1.008	0.986	-0.0424568	0.151859	0.141433	-0.0144996	0.0114956	-0.0203404	0.911411	0.407207	0.634268	0.919106	0.94865	0.969178
Lars	2.13821e+07	0.971	0.927	0.886	0.99	0.923	0.883	-0.0424568	-0.109359	-0.174621	-0.0144996	-0.115597	-0.179515	0.94135	0.789569	0.643363	0.919106	0.924845	0.475917
Pip4k2c	5.03266e+07	0.971	1.037	0.997	0.993	0.958	0.97	-0.0424568	0.0524159	-0.00433459	-0.0101344	-0.0619024	-0.0439433	0.917275	0.927112	0.988634	0.91292	0.973626	0.934369
Cadps	7.40226e+08	0.971	0.974	0.945	0.997	0.974	0.977	-0.0424568	-0.0380063	-0.0816138	-0.00433459	-0.0380063	-0.0335695	0.825096	0.941147	0.853002	0.932017	0.973626	0.92228
Snx5	1.44763e+07	0.971	1.04	1.002	1	0.933	0.933	-0.0424568	0.0565835	0.00288251	0	-0.100051	-0.100051	0.939725	0.96315	0.991875	0.960384	0.956797	0.853156
Lap3	1.36544e+08	0.971	0.968	0.936	1.005	1.021	1.027	-0.0424568	-0.046921	-0.0954196	0.0071955	0.0299829	0.0384362	0.86271	0.911676	0.836446	0.964214	0.901483	0.968101
Elavl1	9.30648e+08	0.971	0.994	0.942	1.034	0.996	1.013	-0.0424568	-0.00868224	-0.086201	0.0482362	-0.00578235	0.0186342	0.81897	0.999791	0.843871	0.987083	0.973626	0.996853
Bcat1	5.3919e+07	0.971	1.014	0.997	1.045	0.892	0.928	-0.0424568	0.0200577	-0.00433459	0.0635029	-0.164884	-0.107803	0.926236	0.975281	0.99023	0.979906	0.649054	0.751103
Prep	3.38161e+07	0.971	1.003	0.982	1.049	0.912	0.978	-0.0424568	0.00432161	-0.0262051	0.0690147	-0.132894	-0.0320936	0.935822	0.999791	0.968695	0.9931	0.887287	0.954932
Adam23	5.03703e+07	0.971	0.941	0.95	1.056	0.984	1.026	-0.0424568	-0.0877334	-0.0740006	0.0786098	-0.0232698	0.0370307	0.924471	0.779439	0.883269	0.986587	0.973626	0.974148
Syt5	3.1739e+07	1.028	1.805	1.754	0.604	1.326	0.747	0.0398403	0.851999	0.810649	-0.72738	0.407081	-0.42082	0.933378	1.15636e-10	3.04222e-08	8.89968e-09	0.00426492	0.00635147
Ajm1	361989	0.971	1.458	1.505	2.32	0.504	1.244	-0.0424568	0.543991	0.589763	1.21412	-0.988504	0.314986	0.97409	0.248194	0.447021	0.153002	0.243553	0.827876
Cyrib	2.11169e+08	0.968	1.146	1.134	1.11	0.953	1.008	-0.046921	0.196607	0.181421	0.15056	-0.0694519	0.0114956	0.795784	0.0242818	0.294774	0.733261	0.952109	0.999853
Prxl2a	4.17551e+07	0.972	0.98	0.945	0.928	1.066	1.009	-0.0409718	-0.0291463	-0.0816138	-0.107803	0.0922074	0.0129262	0.93368	0.958655	0.883269	0.544397	0.700935	0.999853
Akap5	2.32269e+08	0.972	1.026	0.99	0.932	1.012	0.95	-0.0409718	0.0370307	-0.0144996	-0.101598	0.0172093	-0.0740006	0.836209	0.896839	0.989372	0.570794	0.930584	0.854132
Wdr1	4.87086e+08	0.972	0.936	0.906	0.948	1.069	1.013	-0.0409718	-0.0954196	-0.142417	-0.077041	0.0962619	0.0186342	0.837511	0.620653	0.586868	0.661773	0.589595	0.996171
Cttn	2.885e+08	0.972	0.964	0.899	0.962	0.994	0.931	-0.0409718	-0.0528949	-0.153607	-0.0558912	-0.00868224	-0.103147	0.83087	0.89841	0.520794	0.769355	0.973626	0.599615
Efr3b	1.56283e+07	0.972	1.011	0.89	0.983	1.017	1.074	-0.0409718	0.015783	-0.168123	-0.0247367	0.0243197	0.102994	0.94135	0.998187	0.683003	0.910524	0.951532	0.901509
Appl1	3.18684e+07	0.972	0.965	0.904	0.999	0.977	0.98	-0.0409718	-0.0513992	-0.145605	-0.00144342	-0.0335695	-0.0291463	0.939912	0.917913	0.708801	0.920509	0.987609	0.960739
Nsfl1c	1.45138e+08	0.972	1.036	0.995	1.017	1.058	1.039	-0.0409718	0.051024	-0.00723157	0.0243197	0.0813396	0.0551957	0.877918	0.888085	0.999911	0.987083	0.682468	0.929375
Lxn	7.2809e+07	0.972	1.063	1.064	1.068	0.946	1.024	-0.0409718	0.0881416	0.0894982	0.0949116	-0.0800879	0.0342157	0.9161	0.800124	0.840235	0.900496	0.931114	0.97848
Ecpas	6.3636e+06	0.972	1.031	0.982	1.093	0.935	1.045	-0.0409718	0.0440443	-0.0262051	0.128293	-0.0969617	0.0635029	0.978997	0.988849	0.968487	0.965364	0.958874	0.986715
Hapln4	4.14229e+06	0.972	0.954	0.832	1.37	0.844	1.141	-0.0409718	-0.0679388	-0.265345	0.454176	-0.244685	0.190299	0.978966	0.927868	0.634268	0.3619	0.689616	0.775852
Mical3	5.26749e+06	0.973	0.984	0.943	0.888	0.806	0.827	-0.0394883	-0.0232698	-0.0846703	-0.171368	-0.311148	-0.274041	0.981557	0.966572	0.940855	0.834298	0.797637	0.569482
Cpsf6	1.00362e+07	0.973	0.926	0.901	0.94	0.945	0.899	-0.0394883	-0.110916	-0.150401	-0.0892673	-0.0816138	-0.153607	0.961212	0.828817	0.774583	0.816811	0.973626	0.673699
Rbbp9	2.94599e+07	0.973	1.07	1.064	1	0.956	0.917	-0.0394883	0.0976108	0.0894982	0	-0.0649175	-0.125006	0.94135	0.878574	0.915769	0.926755	0.979079	0.737933
Xpo7	1.60348e+07	0.973	1.032	0.995	1.032	0.958	1.022	-0.0394883	0.045443	-0.00723157	0.045443	-0.0619024	0.0313952	0.94135	0.969211	0.980585	0.99022	0.978217	0.989044
Eif4g1	2.04689e+07	0.973	1.004	0.991	1.06	0.886	0.989	-0.0394883	0.00575927	-0.013043	0.0840643	-0.174621	-0.0159576	0.946363	0.998945	0.985217	0.987083	0.812814	0.980927
Dclk2	3.75403e+07	0.973	1.063	1.024	1.064	0.91	1.013	-0.0394883	0.0881416	0.0342157	0.0894982	-0.136062	0.0186342	0.939912	0.855058	0.973644	0.946874	0.875685	0.986715
Sf3b1	2.67046e+07	0.973	1.037	1.047	1.201	0.833	0.974	-0.0394883	0.0524159	0.0662614	0.264236	-0.263612	-0.0380063	0.94135	0.95354	0.950702	0.455228	0.489352	0.949394
KRT2	4.54142e+07	0.859	0.83	0.642	1.113	0.716	0.756	-0.21927	-0.268817	-0.639355	0.154454	-0.481969	-0.403542	0.0880399	0.0111787	6.7089e-08	0.710831	4.03075e-06	3.07631e-05
Caskin1	7.79614e+07	0.974	0.955	0.936	0.916	1.15	1.035	-0.0380063	-0.0664274	-0.0954196	-0.12658	0.201634	0.0496308	0.91163	0.87241	0.850399	0.440379	0.192381	0.95009
Epn2	1.5599e+07	0.974	0.951	0.95	0.969	1.104	1.078	-0.0380063	-0.0724828	-0.0740006	-0.0454314	0.14274	0.108357	0.939912	0.901835	0.915769	0.866538	0.725751	0.890011
Smap2	1.19421e+07	0.974	1.065	1.097	0.989	0.973	0.968	-0.0380063	0.0908534	0.133564	-0.0159576	-0.0394883	-0.046921	0.961212	0.90916	0.885573	0.930527	0.99742	0.934479
Syn3	2.35926e+07	0.974	0.935	0.896	1.003	1.078	1.147	-0.0380063	-0.0969617	-0.158429	0.00432161	0.108357	0.197865	0.944246	0.785461	0.657049	0.926755	0.654055	0.503227
Stum	1.43989e+08	0.974	0.998	0.985	1.017	0.901	0.918	-0.0380063	-0.00288828	-0.0218044	0.0243197	-0.150401	-0.123434	0.879652	0.998187	0.974658	0.987083	0.545273	0.482198
Nagk	1.47208e+07	0.974	0.984	1.074	1.023	0.969	0.994	-0.0380063	-0.0232698	0.102994	0.0328061	-0.0454314	-0.00868224	0.939912	0.969211	0.915769	0.985428	0.991005	0.983904
Matr3	3.15907e+08	0.974	1.001	0.957	1.024	1.035	1.064	-0.0380063	0.00144197	-0.0634092	0.0342157	0.0496308	0.0894982	0.849406	0.985698	0.909278	0.998978	0.831851	0.843728
Hsd17b4	2.16643e+08	0.974	1.014	0.998	1.078	1.014	1.047	-0.0380063	0.0200577	-0.00288828	0.108357	0.0200577	0.0662614	0.855108	0.940614	0.99674	0.836402	0.933686	0.904037
Hnrnpa1	9.8089e+07	0.974	0.961	0.956	1.137	0.971	1.13	-0.0380063	-0.0573917	-0.0649175	0.185232	-0.0424568	0.176323	0.894717	0.896839	0.919639	0.576388	0.979079	0.427065
Tsfm	2.00358e+07	0.974	1.006	1.015	1.149	0.888	1.057	-0.0380063	0.00863031	0.0214797	0.200379	-0.171368	0.0799754	0.961212	0.998945	0.985483	0.796724	0.818956	0.943044
Yjefn3	737716	0.974	1.319	1.285	1.205	0.952	1.147	-0.0380063	0.399445	0.361768	0.269033	-0.0709665	0.197865	0.974085	0.665295	0.771562	0.952887	0.9836	0.931364
Ttc7b	2.58121e+07	0.974	1.104	1.082	1.227	0.906	1.067	-0.0380063	0.14274	0.1137	0.295135	-0.142417	0.0935602	0.961212	0.736703	0.853033	0.3619	0.875833	0.883235
Rps20	7.3209e+07	0.885	0.904	0.802	0.837	1.116	0.916	-0.176251	-0.145605	-0.318326	-0.2567	0.158337	-0.12658	0.168593	0.399044	0.038811	0.0300775	0.364894	0.653915
Ppia	4.43976e+09	0.975	0.977	0.94	0.91	1.113	1.002	-0.0365259	-0.0335695	-0.0892673	-0.136062	0.154454	0.00288251	0.860634	0.95238	0.836446	0.285327	0.241573	0.986715
Serpina1d	5.84243e+07	0.975	1.099	1.015	0.921	1.12	0.979	-0.0365259	0.136191	0.0214797	-0.118727	0.163499	-0.0306192	0.939725	0.504416	0.968695	0.560251	0.347333	0.956261
Ezr	5.5458e+07	0.975	1.05	1.032	0.971	1.115	1.05	-0.0365259	0.0703893	0.045443	-0.0424568	0.157044	0.0703893	0.939317	0.884215	0.939636	0.827225	0.442055	0.924822
Ap3m2	9.52444e+07	0.975	0.983	0.957	0.999	1.017	1.008	-0.0365259	-0.0247367	-0.0634092	-0.00144342	0.0243197	0.0114956	0.91163	0.964159	0.924937	0.946516	0.924845	0.999853
Fkbp2	2.69579e+07	0.975	1.04	1.054	1.005	0.913	0.964	-0.0365259	0.0565835	0.0758749	0.0071955	-0.131313	-0.0528949	0.942769	0.940335	0.933901	0.946874	0.904941	0.929375
Septin7	1.11513e+09	0.975	0.983	0.965	1.023	1.017	1.028	-0.0365259	-0.0247367	-0.0513992	0.0328061	0.0243197	0.0398403	0.857029	0.972195	0.933901	0.995218	0.924845	0.968145
Arhgef2	5.22007e+07	0.975	0.944	0.903	1.027	1.023	1.061	-0.0365259	-0.0831412	-0.147202	0.0384362	0.0328061	0.0854247	0.939317	0.798662	0.63955	0.998108	0.909622	0.890778
Srsf2	5.64805e+07	0.975	0.944	0.918	1.029	0.942	0.92	-0.0365259	-0.0831412	-0.123434	0.041243	-0.086201	-0.120294	0.939317	0.804792	0.762844	0.994798	0.954254	0.708922
Adam10	4.48789e+06	0.975	0.974	0.948	1.036	1.05	1.006	-0.0365259	-0.0380063	-0.077041	0.051024	0.0703893	0.00863031	0.981742	0.96515	0.95288	0.995218	0.929869	0.986592
Npm1	1.32972e+08	0.975	0.973	0.937	1.05	0.93	0.97	-0.0365259	-0.0394883	-0.093879	0.0703893	-0.104697	-0.0439433	0.892151	0.927868	0.835494	0.960526	0.831974	0.901509
Septin3	3.49508e+08	0.975	1.116	1.063	1.067	1.094	1.163	-0.0365259	0.158337	0.0881416	0.0935602	0.129613	0.217851	0.855108	0.104008	0.792276	0.872586	0.375694	0.128393
Pgrmc1	1.5988e+08	0.986	1.148	1.156	1.03	1.016	1.109	-0.0203404	0.199123	0.209141	0.0426443	0.0229004	0.149259	0.93624	0.0660817	0.200319	0.99683	0.930549	0.589676
Fubp1	1.37797e+07	0.975	1.166	1.099	1.155	1.067	1.281	-0.0365259	0.221568	0.136191	0.207893	0.0935602	0.35727	0.94135	0.439199	0.851013	0.796638	0.8793	0.123652
Tfg	2.34219e+07	0.975	1.016	0.994	1.167	0.762	0.943	-0.0365259	0.0229004	-0.00868224	0.222805	-0.392137	-0.0846703	0.952851	0.992438	0.982964	0.693246	0.11385	0.876834
Faf2	7.00061e+06	0.975	1.026	1.027	1.233	0.897	1.104	-0.0365259	0.0370307	0.0384362	0.302173	-0.15682	0.14274	0.985243	0.998109	0.983563	0.718175	0.885039	0.885167
Surf4	1.34986e+07	1.043	0.941	0.993	0.879	0.839	0.756	0.0607392	-0.0877334	-0.0101344	-0.186065	-0.253257	-0.403542	0.914461	0.882339	0.977854	0.52398	0.622994	0.024866
Slc12a2	2.5748e+07	0.976	1.058	1.046	0.892	1.002	0.874	-0.0350469	0.0813396	0.0648829	-0.164884	0.00288251	-0.194295	0.951006	0.901835	0.943218	0.301484	0.944926	0.410503
Abhd14b	4.15726e+06	0.976	1.077	1.033	0.948	0.943	0.899	-0.0350469	0.107018	0.0468403	-0.077041	-0.0846703	-0.153607	0.985762	0.952657	0.975255	0.927195	0.973626	0.849144
Rpl5	1.08539e+08	0.976	1.005	0.98	0.961	0.967	0.891	-0.0350469	0.0071955	-0.0291463	-0.0573917	-0.0484122	-0.166503	0.905504	0.989292	0.973644	0.79213	0.973626	0.35716
Sae1	9.46133e+06	0.976	1.004	0.997	0.963	1.009	1.027	-0.0350469	0.00575927	-0.00433459	-0.0543923	0.0129262	0.0384362	0.961465	0.996636	0.978608	0.866538	0.966277	0.986715
Clns1a	907266	0.976	0.924	0.891	0.993	1.054	1.048	-0.0350469	-0.114035	-0.166503	-0.0101344	0.0758749	0.0676387	0.981742	0.911823	0.859679	0.946874	0.940902	0.998964
Dpysl2	1.1901e+10	0.976	1.004	0.98	0.997	0.982	0.997	-0.0350469	0.00575927	-0.0291463	-0.00433459	-0.0262051	-0.00433459	0.864699	0.974827	0.970806	0.930637	0.996944	0.982184
Actr2	3.30777e+08	0.976	0.987	0.959	0.998	1.07	1.062	-0.0350469	-0.018878	-0.0603973	-0.00288828	0.0976108	0.0867838	0.86739	0.985969	0.919099	0.937715	0.584797	0.856845
Nlgn3	4.31691e+07	0.976	0.948	0.935	1.003	0.897	0.924	-0.0350469	-0.077041	-0.0969617	0.00432161	-0.15682	-0.114035	0.944519	0.826047	0.840235	0.940711	0.815113	0.725308
Myh10	5.80174e+08	0.976	0.96	0.946	1.014	0.886	0.909	-0.0350469	-0.0588937	-0.0800879	0.0200577	-0.174621	-0.137648	0.86271	0.885198	0.858484	0.986587	0.385533	0.385695
Pcdh1	2.46271e+07	0.976	1.093	1.112	1.036	0.919	0.998	-0.0350469	0.128293	0.153157	0.051024	-0.121863	-0.00288828	0.953188	0.789632	0.76229	0.993885	0.924845	0.988056
Rpl7	1.62625e+08	0.976	1.007	0.962	1.042	0.95	0.994	-0.0350469	0.0100637	-0.0558912	0.0593553	-0.0740006	-0.00868224	0.885085	0.974827	0.923842	0.966528	0.915555	0.974224
Cryzl1	2.11533e+06	0.976	0.911	0.911	1.061	1.005	1.045	-0.0350469	-0.134477	-0.134477	0.0854247	0.0071955	0.0635029	0.982944	0.901835	0.86619	0.994798	0.973626	0.986715
Xpnpep1	2.50936e+07	0.976	1.011	0.985	1.086	1.012	1.089	-0.0350469	0.015783	-0.0218044	0.119024	0.0172093	0.123004	0.960878	0.998945	0.968695	0.910524	0.919197	0.780499
Yars1	5.82999e+07	0.976	0.932	0.923	1.09	0.886	1.036	-0.0350469	-0.101598	-0.115597	0.124328	-0.174621	0.051024	0.939912	0.70888	0.794714	0.866538	0.68193	0.955787
Crbn	7.03563e+06	1.014	0.949	1.003	0.997	0.853	0.758	0.0200577	-0.07552	0.00432161	-0.00433459	-0.229382	-0.39973	0.976905	0.901835	0.986577	0.964098	0.732286	0.0901318
Dhdh	5.80082e+06	0.976	1.234	1.08	1.35	0.764	1.24	-0.0350469	0.303342	0.111031	0.432959	-0.388355	0.31034	0.985762	0.598982	0.928757	0.686867	0.571155	0.561826
Chgb	2.41607e+07	0.977	0.942	0.918	0.965	1.088	0.997	-0.0335695	-0.086201	-0.123434	-0.0513992	0.121679	-0.00433459	0.951583	0.822834	0.78627	0.810828	0.571155	0.986715
Ppfia3	1.20245e+08	0.977	0.917	0.913	0.981	1.027	0.997	-0.0335695	-0.125006	-0.131313	-0.027675	0.0384362	-0.00433459	0.90964	0.488511	0.671876	0.881742	0.880078	0.985307
Pcbp1	2.498e+08	0.977	1.011	0.985	0.992	0.997	1.009	-0.0335695	0.015783	-0.0218044	-0.011588	-0.00433459	0.0129262	0.879627	0.95354	0.977871	0.91375	0.973626	0.999853
Nebl	6.45021e+07	0.977	1.029	1.041	0.993	0.983	0.99	-0.0335695	0.041243	0.0579701	-0.0101344	-0.0247367	-0.0144996	0.94135	0.9391	0.919099	0.927195	0.996944	0.974148
Prrt2	2.18657e+08	0.977	1.049	0.988	1.004	0.899	0.901	-0.0335695	0.0690147	-0.0174171	0.00575927	-0.153607	-0.150401	0.87529	0.7061	0.986351	0.960526	0.557836	0.329831
Dctn1	3.00077e+08	0.977	0.973	0.945	1.015	0.995	1.004	-0.0335695	-0.0394883	-0.0816138	0.0214797	-0.00723157	0.00575927	0.873194	0.93468	0.856161	0.987083	0.973626	0.986715
Mdh1	2.99958e+09	0.977	1.004	0.983	1.028	1.039	1.076	-0.0335695	0.00575927	-0.0247367	0.0398403	0.0551957	0.105678	0.872596	0.974721	0.973644	0.994798	0.805234	0.759984
Cdh2	4.69698e+07	0.977	0.987	0.978	1.035	0.988	1.02	-0.0335695	-0.018878	-0.0320936	0.0496308	-0.0174171	0.0285692	0.943753	0.966572	0.959937	0.997778	0.973626	0.985307
Snx2	6.41313e+07	0.977	1.01	0.983	1.036	0.997	0.962	-0.0335695	0.0143553	-0.0247367	0.051024	-0.00433459	-0.0558912	0.94135	0.985698	0.977871	0.995754	0.964994	0.903281
Ptma	1.11696e+07	0.977	0.985	0.977	1.054	1.066	1.154	-0.0335695	-0.0218044	-0.0335695	0.0758749	0.0922074	0.206643	0.961465	0.971526	0.961997	0.9931	0.847078	0.605775
Slc22a1	5.20383e+07	0.845	1.328	1.165	1.342	0.655	0.945	-0.242977	0.409255	0.22033	0.424385	-0.610433	-0.0816138	0.0393468	0.00016669	0.414087	0.00412064	7.2227e-05	0.857461
Plppr2	7.81487e+06	0.977	1.095	1.08	1.144	1.001	1.148	-0.0335695	0.130931	0.111031	0.194087	0.00144197	0.199123	0.974844	0.895657	0.930572	0.788113	0.973626	0.557535
Tacc1	546636	0.977	0.975	0.923	1.515	0.791	1.034	-0.0335695	-0.0365259	-0.115597	0.599318	-0.33825	0.0482362	0.98609	0.969211	0.922975	0.733261	0.873404	0.999853
Acaa2	9.53273e+07	0.978	0.992	0.975	0.902	1.152	1.026	-0.0320936	-0.011588	-0.0365259	-0.148801	0.204141	0.0370307	0.91163	0.988656	0.966474	0.317943	0.157648	0.978393
Txnl1	4.91768e+07	0.978	1.03	1.008	0.936	1.088	1.032	-0.0320936	0.0426443	0.0114956	-0.0954196	0.121679	0.045443	0.946363	0.949714	0.99674	0.678928	0.59385	0.965669
Pgk1	6.43432e+06	1.021	1.305	1.3	1.499	0.664	0.998	0.0299829	0.38405	0.378512	0.584	-0.590745	-0.00288828	0.961212	0.20254	0.349424	0.0392075	0.023662	0.984028
Acly	3.24338e+08	0.978	0.946	0.945	0.985	0.975	0.981	-0.0320936	-0.0800879	-0.0816138	-0.0218044	-0.0365259	-0.027675	0.885085	0.743608	0.853391	0.87692	0.974647	0.934479
Ppa1	1.28429e+08	0.978	1.082	1.043	1.005	0.906	0.936	-0.0320936	0.1137	0.0607392	0.0071955	-0.142417	-0.0954196	0.904283	0.532405	0.890486	0.963385	0.708132	0.72583
Hsp90ab1	1.63427e+09	0.978	0.995	0.959	1.014	0.982	1.006	-0.0320936	-0.00723157	-0.0603973	0.0200577	-0.0262051	0.00863031	0.881444	0.998187	0.915769	0.986587	0.996944	0.994515
Immt	9.24353e+08	0.978	0.999	0.981	1.02	1.053	1.063	-0.0320936	-0.00144342	-0.027675	0.0285692	0.0745054	0.0881416	0.885085	0.989292	0.971048	0.993967	0.707023	0.851208
Snrpd1	1.5359e+07	0.978	1.025	0.992	1.037	1.078	1.118	-0.0320936	0.0356239	-0.011588	0.0524159	0.108357	0.16092	0.954219	0.978553	0.977871	0.994798	0.815113	0.759351
Wasf1	1.29603e+08	0.978	1.001	0.963	1.045	1.024	1.032	-0.0320936	0.00144197	-0.0543923	0.0635029	0.0342157	0.045443	0.906915	0.996329	0.933901	0.961054	0.889103	0.956724
Prkaca	3.64101e+07	0.978	1.038	1.024	1.102	1.012	1.124	-0.0320936	0.0538064	0.0342157	0.140124	0.0172093	0.168642	0.956081	0.927868	0.973644	0.871229	0.939427	0.599615
Kars	7.35655e+07	0.978	1.054	1.018	1.107	0.807	0.899	-0.0320936	0.0758749	0.0257376	0.146655	-0.309359	-0.153607	0.940511	0.863329	0.966763	0.796638	0.112531	0.508668
Tceal5	1.74394e+07	0.89	1.166	1.125	1.026	0.758	0.76	-0.168123	0.221568	0.169925	0.0370307	-0.39973	-0.395929	0.543147	0.445777	0.753992	0.986587	0.0887357	0.0115448
Bag6	5.86331e+07	0.978	1.04	1.027	1.154	1.013	1.118	-0.0320936	0.0565835	0.0384362	0.206643	0.0186342	0.16092	0.942769	0.901835	0.959937	0.691862	0.944926	0.637256
Tmem65	4.91557e+07	0.978	0.996	0.981	1.207	0.864	0.992	-0.0320936	-0.00578235	-0.027675	0.271426	-0.210897	-0.011588	0.941689	0.987975	0.966763	0.446309	0.687715	0.984152
Aldh1l1	1.78698e+08	0.979	0.981	0.97	0.988	0.997	1	-0.0306192	-0.027675	-0.0439433	-0.0174171	-0.00433459	0	0.887426	0.967778	0.95166	0.893228	0.973626	0.985307
Vcp	1.00795e+09	0.979	0.944	0.94	0.992	0.998	0.999	-0.0306192	-0.0831412	-0.0892673	-0.011588	-0.00288828	-0.00144342	0.885085	0.728967	0.836607	0.914076	0.973626	0.983612
Opcml	2.85079e+08	0.979	0.935	0.933	1.011	0.979	1.048	-0.0306192	-0.0969617	-0.100051	0.015783	-0.0306192	0.0676387	0.885085	0.611924	0.786423	0.974593	0.987609	0.901509
Hspa4l	2.85981e+08	0.979	0.999	0.978	1.024	0.977	1.001	-0.0306192	-0.00144342	-0.0320936	0.0342157	-0.0335695	0.00144197	0.887352	0.989292	0.968602	0.999148	0.983571	0.986715
Ldhb	2.85799e+09	0.979	1.053	1.056	1.039	0.973	1.018	-0.0306192	0.0745054	0.0786098	0.0551957	-0.0394883	0.0257376	0.885085	0.653534	0.83035	0.975399	0.973626	0.986715
Rpl9-ps6	4.3162e+07	0.979	1.02	0.978	1.04	0.921	1.017	-0.0306192	0.0285692	-0.0320936	0.0565835	-0.118727	0.0243197	0.959136	0.969211	0.961997	0.992868	0.909622	0.985915
Iars1	1.01934e+07	0.979	0.902	0.923	1.041	0.955	1.015	-0.0306192	-0.148801	-0.115597	0.0579701	-0.0664274	0.0214797	0.968509	0.721302	0.851013	0.998267	0.980166	0.999853
Oat	1.17076e+08	0.979	1.083	1.113	1.078	0.984	1.028	-0.0306192	0.115033	0.154454	0.108357	-0.0232698	0.0398403	0.906915	0.544995	0.518706	0.866538	0.98981	0.95009
Myl12b	9.82838e+07	0.979	1.106	1.033	1.078	1.132	1.195	-0.0306192	0.145351	0.0468403	0.108357	0.178874	0.257011	0.928435	0.346035	0.923434	0.89989	0.32783	0.14426
Ncam2	1.581e+08	0.979	1.025	0.988	1.094	0.851	0.957	-0.0306192	0.0356239	-0.0174171	0.129613	-0.232769	-0.0634092	0.887352	0.900434	0.984009	0.827225	0.247564	0.876834
Ctnnd2	7.25559e+07	0.979	1.06	1.074	1.118	0.982	1.089	-0.0306192	0.0840643	0.102994	0.16092	-0.0262051	0.123004	0.939912	0.800124	0.772622	0.746249	0.997978	0.769657
Apoa1	1.63803e+08	0.86	1.165	0.996	1.158	0.948	0.986	-0.217591	0.22033	-0.00578235	0.211635	-0.077041	-0.0203404	0.00255082	0.0144531	0.999616	0.446333	0.944926	0.956586
Slc1a4	5.39442e+07	0.979	1.082	1.084	1.152	0.914	1.04	-0.0306192	0.1137	0.116365	0.204141	-0.129734	0.0565835	0.951006	0.66146	0.820468	0.540772	0.856932	0.949457
Gng4	2.56395e+07	0.954	0.951	0.905	1.12	0.667	0.762	-0.0679388	-0.0724828	-0.14401	0.163499	-0.584241	-0.392137	0.881429	0.870405	0.681787	0.864543	0.000628461	0.00911004
Vps11	1.90944e+06	0.979	1.003	1.111	1.258	0.902	1.173	-0.0306192	0.00432161	0.151859	0.331132	-0.148801	0.230203	0.985762	0.99636	0.934654	0.817667	0.95144	0.834085
Otub1	2.15435e+08	1.012	1.168	1.171	1.108	0.997	1.078	0.0172093	0.22404	0.227741	0.147958	-0.00433459	0.108357	0.982456	0.00698692	0.111037	0.733261	0.972921	0.719629
Rpl23	8.45966e+07	1.046	0.893	0.924	0.843	1.166	0.989	0.0648829	-0.163268	-0.114035	-0.246395	0.221568	-0.0159576	0.822811	0.289592	0.781997	0.0382435	0.13398	0.972006
Camkk1	4.7804e+06	0.98	0.951	0.941	0.869	1.212	1.082	-0.0291463	-0.0724828	-0.0877334	-0.202572	0.27739	0.1137	0.986674	0.936046	0.936143	0.59841	0.456215	0.927569
Mapt	2.85353e+07	0.949	1.254	1.155	1.252	0.674	0.837	-0.07552	0.326537	0.207893	0.324235	-0.56918	-0.2567	0.855108	0.0395456	0.531437	0.271297	0.00354198	0.172079
Bsn	9.34728e+08	0.98	0.998	0.977	0.973	1.015	0.989	-0.0291463	-0.00288828	-0.0335695	-0.0394883	0.0214797	-0.0159576	0.889505	0.994722	0.963365	0.827225	0.930549	0.957028
Ca2	7.20076e+08	0.98	0.995	0.991	0.973	0.964	0.968	-0.0291463	-0.00723157	-0.013043	-0.0394883	-0.0528949	-0.046921	0.894125	0.998945	0.992578	0.828464	0.958874	0.888312
Cnr1	8.93485e+06	0.98	0.978	1.017	0.977	0.869	0.898	-0.0291463	-0.0320936	0.0243197	-0.0335695	-0.202572	-0.155213	0.982456	0.96315	0.999389	0.906143	0.777776	0.671237
Atp2b4	2.49902e+08	0.98	0.971	0.956	0.994	0.939	0.914	-0.0291463	-0.0424568	-0.0649175	-0.00868224	-0.0908029	-0.129734	0.892151	0.926367	0.905873	0.93052	0.924845	0.62675
Rpsa	1.85467e+08	0.98	1.023	0.994	0.998	1.002	1.03	-0.0291463	0.0328061	-0.00868224	-0.00288828	0.00288251	0.0426443	0.892042	0.901835	0.996392	0.936607	0.962235	0.961426
C2cd2l	4.34603e+07	0.98	0.987	1.008	1.01	1.055	1.071	-0.0291463	-0.018878	0.0114956	0.0143553	0.077243	0.0989585	0.957326	0.969211	0.99674	0.961193	0.733651	0.871453
Rhot1	9.78287e+07	0.98	0.946	0.92	1.016	1.051	1.094	-0.0291463	-0.0800879	-0.120294	0.0229004	0.0717627	0.129613	0.939708	0.794537	0.744045	0.987083	0.754387	0.707881
Rplp0	1.10879e+08	0.98	0.987	0.962	1.025	0.907	0.979	-0.0291463	-0.018878	-0.0558912	0.0356239	-0.140826	-0.0306192	0.926059	0.972962	0.942208	0.994798	0.731472	0.948228
Hnrnpd	2.00943e+08	0.98	0.972	0.947	1.026	0.983	1.049	-0.0291463	-0.0409718	-0.0785637	0.0370307	-0.0247367	0.0690147	0.893747	0.927868	0.868616	0.998978	0.999577	0.901509
Agap2	6.70909e+07	0.98	1.03	1.006	1.042	0.982	1.01	-0.0291463	0.0426443	0.00863031	0.0593553	-0.0262051	0.0143553	0.957326	0.934668	0.977871	0.987083	0.98607	0.999853
Slc25a25	8.39847e+06	0.98	0.874	0.821	1.049	1.02	1.036	-0.0291463	-0.194295	-0.284546	0.0690147	0.0285692	0.051024	0.974367	0.565994	0.411571	0.994798	0.95324	0.985307
Eif3c	5.7927e+07	0.98	1.021	0.971	1.067	0.894	0.979	-0.0291463	0.0299829	-0.0424568	0.0935602	-0.161653	-0.0306192	0.953458	0.960433	0.961997	0.932017	0.750036	0.956034
Acsl6	2.82872e+08	0.98	1.016	0.985	1.072	0.92	0.976	-0.0291463	0.0229004	-0.0218044	0.100305	-0.120294	-0.0350469	0.892151	0.930885	0.976228	0.866538	0.71557	0.921851
Celf2	5.66829e+07	0.98	1.003	0.978	1.08	0.995	1.103	-0.0291463	0.00432161	-0.0320936	0.111031	-0.00723157	0.141433	0.953162	0.998945	0.961997	0.906143	0.958874	0.697866
Rras	3.23535e+06	0.981	1.187	1.144	0.806	1.229	0.927	-0.027675	0.24732	0.194087	-0.311148	0.297485	-0.109359	0.988109	0.782923	0.877244	0.624587	0.612348	0.890011
Rpl7a	1.49078e+08	0.981	0.939	0.92	0.901	1.098	1.005	-0.027675	-0.0908029	-0.120294	-0.150401	0.134878	0.0071955	0.92184	0.705481	0.692933	0.220159	0.346347	0.989044
Ckap4	3.36236e+06	0.981	1.179	1.096	0.972	0.997	0.974	-0.027675	0.237564	0.132248	-0.0409718	-0.00433459	-0.0380063	0.98609	0.848168	0.939328	0.92559	0.973626	0.956034
Bin1	4.05398e+08	0.981	0.986	0.963	0.975	1.001	0.974	-0.027675	-0.0203404	-0.0543923	-0.0365259	0.00144197	-0.0380063	0.894717	0.979243	0.930572	0.841475	0.964994	0.903281
Fabp5	2.5619e+08	0.981	1.028	0.983	0.991	1.03	1.003	-0.027675	0.0398403	-0.0247367	-0.013043	0.0426443	0.00432161	0.894717	0.892941	0.973644	0.910524	0.862946	0.986715
Gabra1	1.0264e+08	0.981	0.939	0.908	0.998	1.033	1.038	-0.027675	-0.0908029	-0.139236	-0.00288828	0.0468403	0.0538064	0.939317	0.733554	0.669935	0.94807	0.880846	0.946024
Tpr	7.7045e+06	0.981	0.988	0.968	0.999	1.073	1.067	-0.027675	-0.0174171	-0.046921	-0.00144342	0.10165	0.0935602	0.988713	0.974721	0.959396	0.963385	0.886966	0.952172
Flot2	1.97974e+08	0.981	1.023	1.01	1.001	0.993	0.99	-0.027675	0.0328061	0.0143553	0.00144197	-0.0101344	-0.0144996	0.894717	0.904584	0.973644	0.948975	0.973626	0.960526
Stx12	3.19451e+07	0.981	1.041	1.036	1.012	1.005	1.005	-0.027675	0.0579701	0.051024	0.0172093	0.0071955	0.0071955	0.968461	0.929801	0.961997	0.963385	0.972921	0.994515
Idh1	1.3085e+08	0.981	0.953	0.933	1.016	1.02	1.031	-0.027675	-0.0694519	-0.100051	0.0229004	0.0285692	0.0440443	0.924471	0.843501	0.818837	0.987033	0.908834	0.957028
Gabrb2	3.80767e+07	0.981	1.028	1.032	1.039	0.963	0.956	-0.027675	0.0398403	0.045443	0.0551957	-0.0543923	-0.0649175	0.961212	0.952657	0.963365	0.994798	0.989707	0.902445
Aldoc	1.92493e+09	0.981	1.077	1.062	1.042	1.095	1.119	-0.027675	0.107018	0.0867838	0.0593553	0.130931	0.16221	0.894717	0.390116	0.798695	0.966652	0.373296	0.410642
Pi4ka	1.41746e+08	0.981	0.999	0.979	1.099	0.897	0.994	-0.027675	-0.00144342	-0.0306192	0.136191	-0.15682	-0.00868224	0.91163	0.998109	0.971048	0.758401	0.570544	0.977734
ND3	2.86747e+06	0.981	1.109	1.085	1.155	0.874	1.042	-0.027675	0.149259	0.117695	0.207893	-0.194295	0.0593553	0.98609	0.922157	0.953296	0.935042	0.915555	0.986715
Tanc2	2.97499e+06	0.981	0.862	1.016	1.386	0.894	1.177	-0.027675	-0.21424	0.0229004	0.470927	-0.161653	0.235114	0.99271	0.720978	0.995853	0.603594	0.942337	0.814392
Eipr1	6.86427e+06	1.043	1	1.095	1.247	0.599	0.767	0.0607392	0	0.130931	0.318461	-0.739372	-0.382702	0.924915	0.985424	0.915769	0.699098	0.0024067	0.0788909
Ndufa1	7.8084e+06	1.082	0.918	0.994	1.228	0.684	0.908	0.1137	-0.123434	-0.00868224	0.296311	-0.547932	-0.139236	0.836261	0.822848	0.980585	0.719663	0.0481115	0.761971
Rab14	3.36706e+07	0.982	1.091	1.082	0.91	1.095	0.965	-0.0262051	0.125651	0.1137	-0.136062	0.130931	-0.0513992	0.962972	0.690285	0.862602	0.435959	0.601579	0.931364
Aldh3a2	1.13447e+07	0.982	0.962	0.962	0.94	1.048	1.091	-0.0262051	-0.0558912	-0.0558912	-0.0892673	0.0676387	0.125651	0.976252	0.927868	0.933901	0.784461	0.904181	0.86955
Acad9	7.56278e+07	0.982	0.977	0.962	0.944	1.065	1.007	-0.0262051	-0.0335695	-0.0558912	-0.0831412	0.0908534	0.0100637	0.944381	0.943315	0.935971	0.68668	0.707834	0.999548
Hnrnph1	2.05197e+08	0.982	0.933	0.916	0.954	1.03	0.99	-0.0262051	-0.100051	-0.12658	-0.0679388	0.0426443	-0.0144996	0.895937	0.583087	0.655095	0.712796	0.863302	0.959122
Mthfd1l	3.69591e+07	0.982	0.998	0.992	0.959	1.059	1.034	-0.0262051	-0.00288828	-0.011588	-0.0603973	0.0827026	0.0482362	0.961465	0.988849	0.977871	0.774011	0.809134	0.970904
Sparcl1	3.47791e+07	0.982	0.966	0.968	0.991	0.982	0.97	-0.0262051	-0.0499049	-0.046921	-0.013043	-0.0262051	-0.0439433	0.961465	0.921831	0.942566	0.896907	0.97529	0.943203
Ank2	1.53293e+09	0.982	0.974	0.959	1.01	0.991	1.01	-0.0262051	-0.0380063	-0.0603973	0.0143553	-0.013043	0.0143553	0.902885	0.940533	0.919099	0.974593	0.983546	0.999853
Psmd2	1.31251e+08	0.982	1.002	1.01	1.019	0.932	0.932	-0.0262051	0.00288251	0.0143553	0.0271541	-0.101598	-0.101598	0.930729	0.989292	0.973644	0.9931	0.873749	0.713634
Fkbp8	2.68594e+07	0.982	1.006	0.978	1.023	0.988	0.991	-0.0262051	0.00863031	-0.0320936	0.0328061	-0.0174171	-0.013043	0.970221	0.998945	0.959937	0.980041	0.973626	0.983544
Ddx1	8.13635e+07	0.982	0.977	0.967	1.03	0.959	1.038	-0.0262051	-0.0335695	-0.0484122	0.0426443	-0.0603973	0.0538064	0.944519	0.943315	0.948741	0.998108	0.965382	0.949457
Thy1	1.48178e+09	0.982	0.962	0.942	1.053	0.993	1.035	-0.0262051	-0.0558912	-0.086201	0.0745054	-0.0101344	0.0496308	0.902885	0.895657	0.843871	0.932017	0.97529	0.948319
Ntm	2.70132e+08	0.982	0.917	0.889	1.068	0.949	1.009	-0.0262051	-0.125006	-0.169745	0.0949116	-0.07552	0.0129262	0.899639	0.390116	0.42	0.871229	0.90695	0.999548
Gga3	2.38456e+07	0.982	1.11	1.183	1.094	0.905	1.154	-0.0262051	0.15056	0.24245	0.129613	-0.14401	0.206643	0.974844	0.743608	0.43719	0.930527	0.885039	0.532756
Acsf2	5.07491e+07	0.982	0.986	0.966	1.095	0.947	1.043	-0.0262051	-0.0203404	-0.0499049	0.130931	-0.0785637	0.0607392	0.961212	0.969211	0.941501	0.866538	0.972921	0.943203
Naxe	9.0385e+07	0.982	1.027	1.039	1.143	1.041	1.152	-0.0262051	0.0384362	0.0551957	0.192825	0.0579701	0.204141	0.942769	0.930885	0.912508	0.499061	0.829338	0.291616
Ddx39b	1.91256e+08	0.982	1	1.009	1.15	0.89	1.002	-0.0262051	0	0.0129262	0.201634	-0.168123	0.00288251	0.901042	0.987121	0.973644	0.30766	0.432897	0.986715
Uso1	6.66161e+07	0.982	1.038	1.053	1.167	0.858	1.016	-0.0262051	0.0538064	0.0745054	0.222805	-0.22095	0.0229004	0.961212	0.904584	0.861963	0.434381	0.481617	0.987051
	4.26052e+06	0.982	1.125	1.111	1.225	0.719	0.956	-0.0262051	0.169925	0.151859	0.292782	-0.475936	-0.0649175	0.991551	0.895056	0.87948	0.917345	0.617778	0.93687
Rps26	7.65591e+07	0.947	0.994	0.923	0.849	1.054	0.925	-0.0785637	-0.00868224	-0.115597	-0.236164	0.0758749	-0.112475	0.754205	0.988767	0.774583	0.0588971	0.763144	0.717658
Aspa	4.72222e+07	1.115	0.941	1.091	0.828	0.932	0.768	0.157044	-0.0877334	0.125651	-0.272297	-0.101598	-0.380822	0.423725	0.832761	0.811616	0.0439536	0.942337	0.014287
Grsf1	1.3483e+06	0.983	1.119	1.15	0.843	1.266	1.29	-0.0247367	0.16221	0.201634	-0.246395	0.340277	0.367371	0.984143	0.914979	0.919099	0.727531	0.593542	0.703745
Erc1	9.59274e+06	0.983	0.872	0.886	0.897	1.123	1.053	-0.0247367	-0.1976	-0.174621	-0.15682	0.167358	0.0745054	0.978235	0.570822	0.73177	0.645105	0.690565	0.953045
aco1	3.43582e+07	0.983	0.908	0.912	0.982	0.999	0.967	-0.0247367	-0.139236	-0.132894	-0.0262051	-0.00144342	-0.0484122	0.964491	0.569262	0.75048	0.866538	0.956555	0.931394
Immt	591115	0.983	0.975	0.911	1.01	0.776	0.783	-0.0247367	-0.0365259	-0.134477	0.0143553	-0.365871	-0.352916	0.991684	0.969211	0.919099	0.960526	0.886966	0.546206
Rab2b	1.24315e+07	0.983	1.021	1.042	1.022	0.966	1.006	-0.0247367	0.0299829	0.0593553	0.0313952	-0.0499049	0.00863031	0.985009	0.985698	0.970806	0.986587	0.997978	0.989039
Nmt1	3.46493e+07	0.983	1.048	0.979	1.033	0.92	0.965	-0.0247367	0.0676387	-0.0306192	0.0468403	-0.120294	-0.0513992	0.96641	0.901835	0.961997	0.994798	0.909622	0.92228
Hsp90aa1	2.98729e+09	0.983	0.969	0.951	1.045	0.959	1.001	-0.0247367	-0.0454314	-0.0724828	0.0635029	-0.0603973	0.00144197	0.908424	0.917913	0.88281	0.960526	0.944926	0.986715
Tubal3	3.7887e+07	0.821	1.391	1.057	1.35	0.671	0.771	-0.284546	0.476122	0.0799754	0.432959	-0.575615	-0.375197	0.0276127	9.24787e-05	0.924727	0.016348	0.000192237	0.00909413
Rapgef2	4.5103e+08	0.983	1.023	1.003	1.058	0.958	1.013	-0.0247367	0.0328061	0.00432161	0.0813396	-0.0619024	0.0186342	0.906579	0.901835	0.986979	0.919329	0.944701	0.997736
Mapk3	1.91113e+07	0.983	0.995	1.015	1.082	1.178	1.276	-0.0247367	-0.00723157	0.0214797	0.1137	0.23634	0.351628	0.984143	0.98864	0.987118	0.960526	0.46917	0.104596
Hnrnpul2	6.78628e+07	0.983	0.969	0.945	1.111	0.905	0.991	-0.0247367	-0.0454314	-0.0816138	0.151859	-0.14401	-0.013043	0.961262	0.923039	0.889902	0.777783	0.739832	0.983612
Tomm34	3.46551e+06	0.983	1.069	1.133	1.14	0.957	1.047	-0.0247367	0.0962619	0.180148	0.189034	-0.0634092	0.0662614	0.992446	0.943764	0.843871	0.943746	0.990265	0.992045
Cbx3	1.03779e+07	1.104	0.965	1.072	0.944	0.835	0.771	0.14274	-0.0513992	0.100305	-0.0831412	-0.260152	-0.375197	0.747581	0.931403	0.922975	0.807934	0.592784	0.0291144
Cops8	1.13253e+07	1.167	1.117	1.3	1.439	0.691	1.055	0.222805	0.159629	0.378512	0.525067	-0.533242	0.077243	0.476775	0.798115	0.271269	0.097679	0.0527213	0.965709
Setd7	2.45298e+07	0.984	1.007	0.951	0.902	1.007	0.942	-0.0232698	0.0100637	-0.0724828	-0.148801	0.0100637	-0.086201	0.971039	0.999791	0.892145	0.363818	0.939893	0.865815
Gas7	2.12274e+07	0.984	0.993	0.946	0.929	1.196	1.083	-0.0232698	-0.0101344	-0.0800879	-0.106249	0.258217	0.115033	0.983776	0.984111	0.896944	0.733896	0.365308	0.890011
Thumpd1	2.41632e+06	0.984	1.006	0.997	0.94	0.885	0.822	-0.0232698	0.00863031	-0.00433459	-0.0892673	-0.176251	-0.28279	0.990037	0.998109	0.977716	0.919106	0.938215	0.532756
Pepd	7.93926e+06	0.984	0.893	0.855	0.974	1.034	1.037	-0.0232698	-0.163268	-0.226004	-0.0380063	0.0482362	0.0524159	0.99271	0.808161	0.634268	0.87447	0.93416	0.974148
Nfasc	1.95871e+07	0.984	0.982	0.969	0.981	0.948	0.958	-0.0232698	-0.0262051	-0.0454314	-0.027675	-0.077041	-0.0619024	0.981951	0.966572	0.958069	0.866538	0.973626	0.909452
Nefm	1.2885e+09	0.984	0.939	0.943	0.99	0.968	0.958	-0.0232698	-0.0908029	-0.0846703	-0.0144996	-0.046921	-0.0619024	0.912151	0.671518	0.848169	0.906188	0.964994	0.843672
Ptk2	1.08068e+07	0.984	0.984	0.984	0.99	1.023	0.987	-0.0232698	-0.0232698	-0.0232698	-0.0144996	0.0328061	-0.018878	0.97409	0.966572	0.968695	0.946874	0.958874	0.968758
Iars2	1.21116e+08	0.984	0.946	0.921	1.011	1.01	0.999	-0.0232698	-0.0800879	-0.118727	0.015783	0.0143553	-0.00144342	0.939912	0.781224	0.728055	0.974593	0.942097	0.989425
Sptbn1	4.95886e+09	0.984	0.983	0.965	1.016	0.981	0.999	-0.0232698	-0.0247367	-0.0513992	0.0229004	-0.027675	-0.00144342	0.911411	0.97273	0.933901	0.987083	0.993381	0.984152
Dlat	1.06602e+09	0.984	0.968	0.952	1.027	1.04	1.059	-0.0232698	-0.046921	-0.0709665	0.0384362	0.0565835	0.0827026	0.911394	0.91455	0.883269	0.995754	0.799624	0.86955
Slc3a2	6.14765e+08	0.984	1.01	1.013	1.027	0.969	0.993	-0.0232698	0.0143553	0.0186342	0.0384362	-0.0454314	-0.0101344	0.911411	0.95354	0.968695	0.996025	0.97151	0.968758
Hadha	2.19645e+08	0.984	0.996	0.988	1.029	0.988	1.029	-0.0232698	-0.00578235	-0.0174171	0.041243	-0.0174171	0.041243	0.90964	0.998187	0.985681	0.994453	0.98981	0.965709
Dpysl5	2.09574e+08	0.984	0.971	0.953	1.03	0.91	0.939	-0.0232698	-0.0424568	-0.0694519	0.0426443	-0.136062	-0.0908029	0.913126	0.924949	0.889582	0.993536	0.623219	0.678568
Usp9x	8.64255e+07	0.984	1.018	1.004	1.054	0.934	0.978	-0.0232698	0.0257376	0.00575927	0.0758749	-0.0985055	-0.0320936	0.958959	0.965376	0.985493	0.960477	0.901483	0.946403
Ctnnb1	2.28357e+08	0.984	1.049	1.027	1.115	0.978	1.069	-0.0232698	0.0690147	0.0384362	0.157044	-0.0320936	0.0962619	0.910386	0.701137	0.933901	0.588876	0.98607	0.8111
Prdx5	6.81616e+08	1.137	1.064	1.202	1.1	1.062	1.162	0.185232	0.0894982	0.265437	0.137504	0.0867838	0.21661	0.0305022	0.545742	0.0442901	0.715744	0.642406	0.133645
Kcnab1	944834	0.985	0.923	0.872	0.817	1.023	0.855	-0.0218044	-0.115597	-0.1976	-0.291592	0.0328061	-0.226004	0.99278	0.920053	0.8291	0.645837	0.960968	0.721057
Tubb5	1.47871e+09	0.985	0.913	0.891	0.957	0.989	0.969	-0.0218044	-0.131313	-0.166503	-0.0634092	-0.0159576	-0.0454314	0.921247	0.341009	0.436566	0.734698	0.987609	0.890011
mKIAA0038	7.027e+07	0.985	0.955	0.966	0.972	0.986	0.985	-0.0218044	-0.0664274	-0.0499049	-0.0409718	-0.0203404	-0.0218044	0.965107	0.884333	0.95166	0.862676	0.982469	0.968101
Syngr3	2.20004e+08	0.985	1.051	1.027	0.977	0.921	0.957	-0.0218044	0.0717627	0.0384362	-0.0335695	-0.118727	-0.0634092	0.914461	0.682384	0.933901	0.855983	0.725372	0.83065
Hectd1	3.73078e+06	0.985	0.985	0.932	0.987	1.106	1.086	-0.0218044	-0.0218044	-0.101598	-0.018878	0.145351	0.119024	0.996042	0.973071	0.927669	0.965364	0.860348	0.947433
Epb41l1	2.94735e+08	0.985	0.941	0.925	1.02	1	1.024	-0.0218044	-0.0877334	-0.112475	0.0285692	0	0.0342157	0.9161	0.690619	0.722308	0.993885	0.968552	0.980441
Dync1li1	1.21666e+08	0.985	0.983	0.975	1.023	0.94	0.973	-0.0218044	-0.0247367	-0.0365259	0.0328061	-0.0892673	-0.0394883	0.939912	0.968127	0.964441	0.994798	0.908834	0.936567
Rnf14	6.10451e+06	0.985	0.814	0.936	1.024	0.949	0.947	-0.0218044	-0.296899	-0.0954196	0.0342157	-0.07552	-0.0785637	0.990505	0.140602	0.883269	0.987083	0.973626	0.890011
Asrgl1	1.33829e+08	0.985	1.017	1.02	1.045	0.934	0.961	-0.0218044	0.0243197	0.0285692	0.0635029	-0.0985055	-0.0573917	0.94135	0.952657	0.955295	0.969005	0.862072	0.868527
Vac14	3.26103e+06	0.985	0.93	0.976	1.171	0.921	0.972	-0.0218044	-0.104697	-0.0350469	0.227741	-0.118727	-0.0409718	0.992704	0.899717	0.967024	0.908089	0.964994	0.960694
Adsl	1.45775e+07	0.985	1.258	1.236	1.314	0.926	1.101	-0.0218044	0.331132	0.305679	0.393965	-0.110916	0.138814	0.969286	0.129671	0.35302	0.480091	0.944926	0.890011
Kcnd2	2.2036e+06	0.986	0.886	0.88	0.839	1.143	0.966	-0.0203404	-0.174621	-0.184425	-0.253257	0.192825	-0.0499049	0.98769	0.86498	0.77849	0.667998	0.772996	0.95009
Nmt2	8.22741e+06	0.986	1.034	0.983	0.899	0.991	1.002	-0.0203404	0.0482362	-0.0247367	-0.153607	-0.013043	0.00288251	0.996042	0.988849	0.973644	0.809534	0.989707	0.986715
App	5.83421e+07	0.986	1.052	0.985	0.903	0.92	0.774	-0.0203404	0.0731347	-0.0218044	-0.147202	-0.120294	-0.369595	0.970624	0.870405	0.979709	0.381923	0.831974	0.00769711
Asphd2	2.28259e+07	1.089	1.008	1.116	1.416	0.696	0.998	0.123004	0.0114956	0.158337	0.501821	-0.522841	-0.00288828	0.683501	0.999791	0.750831	0.0162033	0.0092856	0.988702
Ube2d3	9.07648e+06	1.249	0.996	1.239	1.517	0.699	1.041	0.320773	-0.00578235	0.309176	0.601221	-0.516636	0.0579701	0.170807	0.988767	0.510149	0.0304158	0.0713483	0.980441
Rpl21	2.97423e+07	0.986	0.966	0.933	0.963	1.098	1.064	-0.0203404	-0.0499049	-0.100051	-0.0543923	0.134878	0.0894982	0.974085	0.916651	0.851744	0.79213	0.569486	0.900336
Rtn4	4.83016e+08	0.986	0.985	0.989	0.968	0.979	0.954	-0.0203404	-0.0218044	-0.0159576	-0.046921	-0.0306192	-0.0679388	0.925377	0.978579	0.987473	0.800669	0.988223	0.809933
Synj1	8.89439e+08	0.986	0.978	0.969	0.978	0.943	0.928	-0.0203404	-0.0320936	-0.0454314	-0.0320936	-0.0846703	-0.107803	0.9241	0.95354	0.948373	0.865136	0.884431	0.572045
Pin1	6.99191e+07	0.986	1.01	1.007	0.992	0.997	0.979	-0.0203404	0.0143553	0.0100637	-0.011588	-0.00433459	-0.0306192	0.970221	0.988767	0.979709	0.920509	0.960082	0.957341
Rufy3	9.06273e+07	0.986	1.096	1.077	0.998	1.011	1.033	-0.0203404	0.132248	0.107018	-0.00288828	0.015783	0.0468403	0.961212	0.50517	0.774583	0.940163	0.942337	0.965709
Dlg4	3.71076e+08	0.986	0.944	0.932	1.005	1.018	1.019	-0.0203404	-0.0831412	-0.101598	0.0071955	0.0257376	0.0271541	0.924471	0.723863	0.77849	0.960526	0.920738	0.986715
Kif2a	1.0112e+08	0.986	0.988	0.981	1.007	0.969	0.982	-0.0203404	-0.0174171	-0.027675	0.0100637	-0.0454314	-0.0262051	0.961212	0.9745	0.973644	0.972417	0.97529	0.955151
Tmed9	5.08051e+07	0.952	1.179	1.129	1.056	0.792	0.893	-0.0709665	0.237564	0.175045	0.0786098	-0.336428	-0.163268	0.837219	0.0922972	0.623217	0.968047	0.124222	0.501166
Hpx	3.99662e+06	0.815	1.091	0.834	1.068	0.702	0.79	-0.295128	0.125651	-0.261881	0.0949116	-0.510457	-0.340075	0.336512	0.885331	0.634268	0.987083	0.0721649	0.136105
Eef1a2	1.66889e+09	0.986	1.003	0.975	1.064	0.975	1.05	-0.0203404	0.00432161	-0.0365259	0.0894982	-0.0365259	0.0703893	0.924471	0.978579	0.961997	0.893348	0.97529	0.897996
Mlec	9.91416e+06	0.927	1.075	1.074	0.997	0.729	0.777	-0.109359	0.104337	0.102994	-0.00433459	-0.456009	-0.364013	0.808659	0.904584	0.940855	0.960526	0.0998321	0.0838858
Psma1	9.54128e+07	0.986	1.15	1.147	1.085	1.123	1.196	-0.0203404	0.201634	0.197865	0.117695	0.167358	0.258217	0.961212	0.142584	0.304784	0.896996	0.360929	0.169731
Cend1	1.11291e+08	0.986	1.041	0.974	1.169	0.917	1.065	-0.0203404	0.0579701	-0.0380063	0.225275	-0.125006	0.0908534	0.949731	0.893813	0.966653	0.436926	0.861393	0.887854
Scn8a	8.78903e+06	1.113	1.049	1.182	1.539	0.71	1.208	0.154454	0.0690147	0.24123	0.621993	-0.494109	0.27262	0.77021	0.972195	0.671876	0.0152955	0.0840947	0.426654
Arpp21	1.1339e+07	0.986	1.123	1.074	1.248	1.151	1.435	-0.0203404	0.167358	0.102994	0.319618	0.202888	0.521051	0.982456	0.720978	0.931651	0.817717	0.764638	0.123652
Enpp6	1.81781e+07	1.024	1.119	1.129	1.182	0.632	0.779	0.0342157	0.16221	0.175045	0.24123	-0.662004	-0.360305	0.94135	0.683922	0.750456	0.6872	0.000276451	0.0235851
Osbp	2.73036e+07	0.987	0.952	0.963	0.923	1.16	1.036	-0.018878	-0.0709665	-0.0543923	-0.115597	0.214125	0.051024	0.978994	0.888085	0.933901	0.546003	0.261388	0.960526
Cpne5	3.98755e+07	0.987	1.05	1.036	0.94	0.844	0.952	-0.018878	0.0703893	0.051024	-0.0892673	-0.244685	-0.0709665	0.976252	0.901835	0.963365	0.782957	0.620468	0.890011
Rack1	2.32289e+08	0.987	0.965	0.939	0.947	0.996	0.958	-0.018878	-0.0513992	-0.0908029	-0.0785637	-0.00578235	-0.0619024	0.931819	0.901835	0.825861	0.64788	0.973626	0.838307
Ckap5	4.63983e+07	0.987	0.977	0.975	0.965	0.968	0.951	-0.018878	-0.0335695	-0.0365259	-0.0513992	-0.046921	-0.0724828	0.974085	0.93664	0.959937	0.800669	0.996944	0.885167
Nckipsd	5.44351e+07	0.987	1.022	1.01	0.966	1.026	1.016	-0.018878	0.0313952	0.0143553	-0.0499049	0.0370307	0.0229004	0.974085	0.961716	0.977871	0.835065	0.891568	0.986715
Psmc4	3.75031e+07	0.987	0.979	0.956	0.986	0.93	0.933	-0.018878	-0.0306192	-0.0649175	-0.0203404	-0.104697	-0.100051	0.976252	0.956741	0.919099	0.874419	0.944532	0.827876
G3bp2	3.2129e+07	0.987	0.897	0.874	1.002	1.054	1.033	-0.018878	-0.15682	-0.194295	0.00288251	0.0758749	0.0468403	0.981557	0.461232	0.538405	0.93052	0.777544	0.960694
Atp1b1	4.39303e+09	0.987	0.984	0.989	1.007	1.003	1.005	-0.018878	-0.0232698	-0.0159576	0.0100637	0.00432161	0.0071955	0.933081	0.974276	0.987491	0.965364	0.960082	0.989044
Cdv3	2.62177e+07	0.987	0.933	0.94	1.031	0.96	1.006	-0.018878	-0.100051	-0.0892673	0.0440443	-0.0588937	0.00863031	0.976902	0.749781	0.874362	0.987083	0.983826	0.999853
Inf2	9.60974e+06	0.987	1.149	1.122	1.041	0.968	1.014	-0.018878	0.200379	0.166073	0.0579701	-0.046921	0.0200577	0.984513	0.661202	0.851013	0.997457	0.976361	0.989044
Arf6	2.8298e+07	0.987	1.052	1.016	1.052	0.871	0.951	-0.018878	0.0731347	0.0229004	0.0731347	-0.199255	-0.0724828	0.979278	0.904584	0.992578	0.993885	0.728692	0.890778
Serbp1	1.69688e+07	0.987	0.94	0.96	1.053	0.906	0.912	-0.018878	-0.0892673	-0.0588937	0.0745054	-0.142417	-0.132894	0.990974	0.865641	0.939328	0.994453	0.886966	0.710913
Slc1a2	5.34044e+09	0.987	0.975	0.984	1.087	0.906	1.016	-0.018878	-0.0365259	-0.0232698	0.120352	-0.142417	0.0229004	0.932396	0.943339	0.973644	0.79213	0.590075	0.987051
Prkar1b	9.73978e+06	0.987	0.986	0.955	1.092	0.915	1.095	-0.018878	-0.0203404	-0.0664274	0.126973	-0.128156	0.130931	0.983776	0.969211	0.932045	0.93759	0.933686	0.871453
Plxnc1	4.55676e+06	0.987	1.143	1.105	1.104	0.844	1.006	-0.018878	0.192825	0.144046	0.14274	-0.244685	0.00863031	0.994303	0.797996	0.890607	0.960526	0.808939	0.986715
Rgs7bp	1.32506e+07	0.987	0.964	0.968	1.14	0.987	1.165	-0.018878	-0.0528949	-0.046921	0.189034	-0.018878	0.22033	0.974085	0.925063	0.953296	0.8395	0.978138	0.570344
Nceh1	6.99683e+07	0.987	1.071	1.075	1.143	0.882	1.01	-0.018878	0.0989585	0.104337	0.192825	-0.181149	0.0143553	0.974012	0.729247	0.796793	0.598934	0.648746	0.999853
Ssr4	1.35196e+07	0.987	1.146	1.153	1.194	0.771	0.839	-0.018878	0.196607	0.205393	0.255803	-0.375197	-0.253257	0.970624	0.569085	0.671876	0.672332	0.214387	0.22226
Agfg1	3.13393e+07	1.345	0.635	1.033	1.131	0.715	0.91	0.427606	-0.655172	0.0468403	0.177599	-0.483985	-0.136062	0.000138073	2.62177e-09	0.963365	0.770235	0.00293826	0.628521
Mbp	1.4329e+10	1.017	1.006	1.014	0.869	1.079	0.915	0.0243197	0.00863031	0.0200577	-0.202572	0.109695	-0.128156	0.961212	0.969211	0.968695	0.0575089	0.503205	0.445766
Pcbp3	9.39942e+06	0.988	0.907	0.916	0.805	1.17	1.089	-0.0174171	-0.140826	-0.12658	-0.312939	0.226509	0.123004	0.992929	0.738997	0.833582	0.153491	0.47269	0.876834
Tppp	5.24683e+08	0.988	0.965	0.964	0.935	1.039	0.974	-0.0174171	-0.0513992	-0.0528949	-0.0969617	0.0551957	-0.0380063	0.935428	0.901835	0.933901	0.52398	0.809134	0.906433
Actg1	2.4558e+10	0.988	0.955	0.941	0.959	1.098	1.059	-0.0174171	-0.0664274	-0.0877334	-0.0603973	0.134878	0.0827026	0.939317	0.848705	0.842549	0.746249	0.353892	0.86955
Ncam1	2.15117e+08	0.988	0.915	0.925	0.972	0.988	0.951	-0.0174171	-0.128156	-0.112475	-0.0409718	-0.0174171	-0.0724828	0.933702	0.359436	0.723232	0.827225	0.991332	0.78791
Gsk3b	9.79671e+07	0.988	0.966	0.987	0.995	1.019	1.018	-0.0174171	-0.0499049	-0.018878	-0.00723157	0.0271541	0.0257376	0.965802	0.901835	0.989795	0.924527	0.924845	0.986715
Lgalsl	1.34442e+08	0.988	1.038	1.024	1.057	1.038	1.018	-0.0174171	0.0538064	0.0342157	0.0799754	0.0538064	0.0257376	0.951632	0.894111	0.949746	0.935277	0.828364	0.983544
Hook3	1.29373e+06	0.988	0.973	0.975	1.07	0.787	0.893	-0.0174171	-0.0394883	-0.0365259	0.0976108	-0.345564	-0.163268	0.99271	0.974827	0.967789	0.9931	0.886966	0.876834
Slc25a27	6.12357e+06	0.988	1.116	1.041	1.324	0.917	1.145	-0.0174171	0.158337	0.0579701	0.404903	-0.125006	0.195348	0.996534	0.870405	0.973644	0.558406	0.936376	0.901509
Tmpo	3.80565e+06	0.989	0.949	0.969	0.826	1.03	0.834	-0.0159576	-0.07552	-0.0454314	-0.275786	0.0426443	-0.261881	0.99982	0.92364	0.961997	0.712976	0.952109	0.593744
Atp4a	2.37203e+07	0.966	1.268	1.156	1.333	0.601	0.78	-0.0499049	0.342555	0.209141	0.414677	-0.734563	-0.358454	0.925377	0.0306393	0.562175	0.0658973	1.99964e-05	0.0285165
Acads	1.03049e+07	0.989	0.943	0.93	0.934	1.028	1.059	-0.0159576	-0.0846703	-0.104697	-0.0985055	0.0398403	0.0827026	0.985762	0.89745	0.874362	0.79213	0.933686	0.95009
Rab23	8.15064e+06	0.989	1.004	1.016	0.956	1.132	1.157	-0.0159576	0.00575927	0.0229004	-0.0649175	0.178874	0.210389	0.992929	0.996329	0.996138	0.869309	0.699711	0.68765
Atp5c1	1.01947e+09	0.989	0.981	0.982	0.998	1.027	1.033	-0.0159576	-0.027675	-0.0262051	-0.00288828	0.0384362	0.0468403	0.94135	0.968127	0.973644	0.936107	0.883427	0.955151
Aldoa	6.29293e+09	0.989	0.972	0.956	1.009	1.044	1.037	-0.0159576	-0.0409718	-0.0649175	0.0129262	0.0621217	0.0524159	0.94135	0.927731	0.905562	0.974391	0.775276	0.943044
Gmppa	4.99929e+06	0.989	1.055	1.11	1.029	0.99	0.981	-0.0159576	0.077243	0.15056	0.041243	-0.0144996	-0.027675	0.997862	0.965376	0.87948	0.993967	0.991332	0.968101
Pdha1	1.32918e+09	0.989	1.023	1.011	1.037	0.976	1.017	-0.0159576	0.0328061	0.015783	0.0524159	-0.0350469	0.0243197	0.939725	0.901835	0.971178	0.98433	0.978596	0.986715
Rangap1	3.99443e+06	0.989	0.916	0.941	1.202	0.936	1.139	-0.0159576	-0.12658	-0.0877334	0.265437	-0.0954196	0.187768	0.991684	0.780446	0.92401	0.849546	0.958874	0.896654
Cyp46a1	7.12299e+07	0.989	1.073	1.05	1.249	0.836	1.042	-0.0159576	0.10165	0.0703893	0.320773	-0.258425	0.0593553	0.978997	0.714393	0.881848	0.279002	0.360802	0.946024
Hdhd3	1.42414e+06	0.989	1.221	1.211	1.428	0.833	1.192	-0.0159576	0.288063	0.276199	0.513996	-0.263612	0.253384	0.985762	0.736839	0.823824	0.704275	0.930549	0.876834
Dip2c	5.02203e+06	0.99	1.107	1.095	0.892	0.98	0.926	-0.0144996	0.146655	0.130931	-0.164884	-0.0291463	-0.110916	0.996042	0.901835	0.909354	0.827225	0.992455	0.864002
Mthfd1	2.00496e+07	0.99	0.935	0.911	0.915	1.131	1.016	-0.0144996	-0.0969617	-0.134477	-0.128156	0.177599	0.0229004	0.991551	0.80327	0.77578	0.511923	0.46917	0.986715
Etf1	1.0107e+07	0.99	0.9	0.896	1.021	1.01	1.005	-0.0144996	-0.152003	-0.158429	0.0299829	0.0143553	0.0071955	0.985762	0.671131	0.739908	0.979906	0.964994	0.986715
Tufm	4.40835e+08	0.99	1.001	0.963	1.035	1.036	1.035	-0.0144996	0.00144197	-0.0543923	0.0496308	0.051024	0.0496308	0.942769	0.984325	0.930634	0.987083	0.817328	0.948319
Syncrip	3.82773e+07	0.99	0.937	0.937	1.039	1.01	1.06	-0.0144996	-0.093879	-0.093879	0.0551957	0.0143553	0.0840643	0.985041	0.785774	0.858484	0.999148	0.923344	0.901509
Synpr	6.25956e+07	0.99	0.943	0.933	1.052	0.955	1.065	-0.0144996	-0.0846703	-0.100051	0.0731347	-0.0664274	0.0908534	0.985762	0.782119	0.840235	0.940163	0.934412	0.840288
Oxct1	4.12673e+08	0.99	1.017	0.997	1.059	0.968	1.011	-0.0144996	0.0243197	-0.00433459	0.0827026	-0.046921	0.015783	0.94135	0.925063	0.99772	0.917345	0.967274	0.999853
Slc4a4	2.39652e+08	0.99	1.004	0.998	1.095	0.873	0.958	-0.0144996	0.00575927	-0.00288828	0.130931	-0.195946	-0.0619024	0.94135	0.974827	0.99674	0.746249	0.265832	0.840078
Ryr2	7.35696e+07	0.99	1.011	1.018	1.138	0.848	0.967	-0.0144996	0.015783	0.0257376	0.186501	-0.237864	-0.0484122	0.983395	0.983056	0.963935	0.581854	0.278414	0.908938
Slc16a1	1.01489e+07	0.99	0.971	0.953	1.14	0.865	1.091	-0.0144996	-0.0424568	-0.0694519	0.189034	-0.209228	0.125651	0.990658	0.948732	0.923434	0.827225	0.732342	0.851642
Syt12	6.00344e+06	0.99	1.3	1.181	1.175	0.818	0.918	-0.0144996	0.378512	0.240009	0.232661	-0.289827	-0.123434	0.995627	0.121401	0.671876	0.752589	0.535043	0.780927
Shoc2	1.33301e+06	0.99	0.903	1.045	1.466	0.713	0.977	-0.0144996	-0.147202	0.0635029	0.551885	-0.488026	-0.0335695	0.992929	0.90357	0.991896	0.64788	0.623507	0.957028
Stx16	1.72982e+06	0.99	1.252	1.375	1.841	0.779	1.382	-0.0144996	0.324235	0.459432	0.88049	-0.360305	0.466758	0.985762	0.683512	0.522893	0.253197	0.886966	0.548749
Pura	3.241e+08	0.991	0.915	0.926	0.94	1.038	0.982	-0.013043	-0.128156	-0.110916	-0.0892673	0.0538064	-0.0262051	0.949731	0.363349	0.737198	0.569428	0.811663	0.935096
Acot7	3.4804e+08	0.991	0.946	0.964	0.941	1.004	0.946	-0.013043	-0.0800879	-0.0528949	-0.0877334	0.00575927	-0.0800879	0.949731	0.740181	0.933839	0.582108	0.958874	0.737933
Ctsb	1.02833e+08	0.991	0.998	0.961	0.946	0.99	0.939	-0.013043	-0.00288828	-0.0573917	-0.0800879	-0.0144996	-0.0908029	0.969286	0.999791	0.933901	0.700802	0.973626	0.791538
Ppp1r2	6.82453e+06	0.991	1.03	1.033	0.96	1.319	1.213	-0.013043	0.0426443	0.0468403	-0.0588937	0.399445	0.27858	0.99982	0.989292	0.973644	0.930942	0.235006	0.688688
Sipa1l1	1.28439e+07	0.991	0.993	0.959	0.961	1.069	1.02	-0.013043	-0.0101344	-0.0603973	-0.0573917	0.0962619	0.0285692	0.981557	0.984325	0.933901	0.827225	0.81627	0.994515
Ephb2	1.61438e+07	0.991	1.094	1.082	0.973	0.913	0.88	-0.013043	0.129613	0.1137	-0.0394883	-0.131313	-0.184425	0.978997	0.847606	0.890607	0.871075	0.90695	0.501166
Cadm3	1.94342e+08	0.991	0.899	0.901	0.985	1.071	1.05	-0.013043	-0.153607	-0.150401	-0.0218044	0.0989585	0.0703893	0.948693	0.205049	0.539937	0.878473	0.575875	0.899616
Sh3gl2	1.41442e+09	0.991	1.022	1.018	0.994	0.904	0.883	-0.013043	0.0313952	0.0257376	-0.00868224	-0.145605	-0.179515	0.944519	0.901835	0.959937	0.920764	0.571155	0.167246
Phgdh	3.78536e+08	0.991	1.005	1.005	0.997	1.034	1.024	-0.013043	0.0071955	0.0071955	-0.00433459	0.0482362	0.0342157	0.947195	0.971526	0.982523	0.930527	0.831974	0.978208
Cap1	5.89488e+08	0.991	0.964	0.982	1.01	0.96	0.971	-0.013043	-0.0528949	-0.0262051	0.0143553	-0.0588937	-0.0424568	0.949731	0.90047	0.973644	0.974593	0.947773	0.898224
Cntn1	1.40139e+09	0.991	0.988	0.975	1.035	0.941	0.968	-0.013043	-0.0174171	-0.0365259	0.0496308	-0.0877334	-0.046921	0.950745	0.988767	0.961997	0.987083	0.872777	0.888313
Ndufs4	1.08438e+08	0.991	1.004	0.987	1.048	0.965	1.058	-0.013043	0.00575927	-0.018878	0.0676387	-0.0513992	0.0813396	0.970624	0.996444	0.989372	0.974391	0.973626	0.890011
Ap2m1	1.03698e+09	0.991	0.97	0.965	1.067	0.921	1	-0.013043	-0.0439433	-0.0513992	0.0935602	-0.118727	0	0.951481	0.921831	0.933901	0.877162	0.71931	0.985307
Psmb6	8.41012e+07	0.991	0.979	0.964	1.067	0.923	0.972	-0.013043	-0.0306192	-0.0528949	0.0935602	-0.115597	-0.0409718	0.976252	0.95238	0.939328	0.920509	0.838573	0.929946
Gmps	5.9399e+07	0.991	0.984	1.009	1.103	0.932	1.011	-0.013043	-0.0232698	0.0129262	0.141433	-0.101598	0.015783	0.985488	0.966572	0.973644	0.819751	0.941035	0.991398
Mcu	2.60987e+07	0.983	1.155	1.109	1.047	0.736	0.78	-0.0247367	0.207893	0.149259	0.0662614	-0.442222	-0.358454	0.966735	0.351472	0.769526	0.994798	0.0125666	0.0147653
Zzef1	608634	0.991	1.059	1.176	1.461	0.923	1.333	-0.013043	0.0827026	0.233888	0.546956	-0.115597	0.414677	0.994303	0.984521	0.907587	0.746249	0.999918	0.653509
Actr1b	2.91996e+08	0.995	1.062	1.045	1.194	0.942	1.111	-0.00723157	0.0867838	0.0635029	0.255803	-0.086201	0.151859	0.961465	0.569085	0.877627	0.0929733	0.873749	0.485145
Fdps	5.26849e+06	0.992	0.867	0.905	0.898	1.247	1.133	-0.011588	-0.205896	-0.14401	-0.155213	0.318461	0.180148	0.99982	0.570822	0.840235	0.804906	0.409825	0.865815
Dhrs1	1.3418e+07	0.992	1.089	1.085	0.93	0.986	0.961	-0.011588	0.123004	0.117695	-0.104697	-0.0203404	-0.0573917	0.98609	0.861036	0.894027	0.779607	0.976433	0.92519
Abhd6	8.84662e+06	0.992	0.862	0.876	0.954	1.021	0.916	-0.011588	-0.21424	-0.190997	-0.0679388	0.0299829	-0.12658	0.991522	0.471368	0.67202	0.858902	0.941775	0.777469
Eif4e	2.91533e+07	0.992	1.022	1.005	0.976	1.115	1.061	-0.011588	0.0313952	0.0071955	-0.0350469	0.157044	0.0854247	0.99271	0.980101	0.996138	0.866538	0.455701	0.901509
Grm2	3.41778e+07	0.992	1.044	1.041	0.996	1.018	1.038	-0.011588	0.0621217	0.0579701	-0.00578235	0.0257376	0.0538064	0.989689	0.916723	0.95908	0.910524	0.91768	0.95009
Sars	1.84347e+08	0.992	0.998	0.973	1.021	0.889	0.891	-0.011588	-0.00288828	-0.0394883	0.0299829	-0.169745	-0.166503	0.957326	0.994722	0.957917	0.993504	0.432693	0.221465
Pcx	6.6141e+08	0.992	1.01	0.998	1.023	0.994	1.01	-0.011588	0.0143553	-0.00288828	0.0328061	-0.00868224	0.0143553	0.959018	0.956741	0.996822	0.995218	0.973626	0.999853
Csnk2a1	1.14286e+08	0.992	1.007	1.003	1.084	0.944	1.038	-0.011588	0.0100637	0.00432161	0.116365	-0.0831412	0.0538064	0.972644	0.98512	0.982523	0.864178	0.930549	0.941263
Huwe1	2.71328e+07	0.992	1	0.998	1.098	0.898	1.014	-0.011588	0	-0.00288828	0.134878	-0.155213	0.0200577	0.992929	0.989292	0.987458	0.903833	0.847375	0.989044
Mpst	2.80766e+07	0.992	0.987	0.94	1.107	0.876	0.962	-0.011588	-0.018878	-0.0892673	0.146655	-0.190997	-0.0558912	0.991684	0.964336	0.869027	0.881742	0.755758	0.929375
Itm2c	6.71573e+06	0.992	0.995	0.997	1.149	0.814	0.919	-0.011588	-0.00723157	-0.00433459	0.200379	-0.296899	-0.121863	0.99982	0.974827	0.987118	0.874319	0.547714	0.806404
Tnpo2	2.53734e+07	0.992	1.063	1.052	1.171	0.924	1.075	-0.011588	0.0881416	0.0731347	0.227741	-0.114035	0.104337	0.99271	0.899853	0.933506	0.750431	0.930584	0.890778
Lin7a	1.82945e+08	0.951	1.185	1.151	0.961	1.079	1.064	-0.0724828	0.244887	0.202888	-0.0573917	0.109695	0.0894982	0.614909	0.00232287	0.187212	0.791766	0.612348	0.873687
Wdfy1	1.5413e+07	1.409	0.829	1.192	1.281	0.685	0.792	0.494672	-0.270556	0.253384	0.35727	-0.545824	-0.336428	0.000290867	0.29235	0.562794	0.319652	0.0190971	0.0673561
Ppp1r1a	2.06341e+07	0.993	1.071	1.098	0.869	1.046	0.902	-0.0101344	0.0989585	0.134878	-0.202572	0.0648829	-0.148801	0.99982	0.896839	0.816317	0.526185	0.899424	0.653915
Cadps	1.00871e+07	0.993	0.948	0.934	0.934	0.975	0.892	-0.0101344	-0.077041	-0.0985055	-0.0985055	-0.0365259	-0.164884	0.991684	0.901835	0.881848	0.771306	0.999918	0.577233
Pitpnc1	6.1075e+06	0.993	0.926	0.935	0.955	0.987	0.93	-0.0101344	-0.110916	-0.0969617	-0.0664274	-0.018878	-0.104697	0.99982	0.84586	0.909354	0.923801	0.999918	0.885001
Amph	5.77806e+08	0.993	0.978	0.95	0.983	0.997	0.998	-0.0101344	-0.0320936	-0.0740006	-0.0247367	-0.00433459	-0.00288828	0.961212	0.95354	0.87948	0.869273	0.973626	0.983544
Akr1a1	1.28142e+08	0.993	1.138	1.107	1.011	1.115	1.092	-0.0101344	0.186501	0.146655	0.015783	0.157044	0.126973	0.970221	0.134955	0.54	0.973449	0.373428	0.731415
Hspa4	6.38374e+08	0.993	0.944	0.942	1.016	0.939	0.959	-0.0101344	-0.0831412	-0.086201	0.0229004	-0.0908029	-0.0603973	0.961212	0.722946	0.843871	0.987083	0.851399	0.84621
Ckb	1.00894e+10	0.993	1.033	1.026	1.017	0.979	0.97	-0.0101344	0.0468403	0.0370307	0.0243197	-0.0306192	-0.0439433	0.961212	0.856826	0.937101	0.987083	0.988875	0.890778
Fscn1	6.57552e+08	0.993	0.94	0.949	1.022	0.947	0.974	-0.0101344	-0.0892673	-0.07552	0.0313952	-0.0785637	-0.0380063	0.960446	0.683512	0.878333	0.994798	0.900091	0.903281
Ptpn11	5.32751e+07	0.993	1.049	1.052	1.022	0.893	0.893	-0.0101344	0.0690147	0.0731347	0.0313952	-0.163268	-0.163268	0.991551	0.881359	0.919639	0.986587	0.760783	0.488834
Lrrc47	2.39847e+07	0.993	0.965	0.991	1.022	0.954	0.982	-0.0101344	-0.0513992	-0.013043	0.0313952	-0.0679388	-0.0262051	0.99982	0.915607	0.977716	0.979733	0.97529	0.971571
Ncl	1.25671e+08	0.993	0.952	0.938	1.033	0.964	0.999	-0.0101344	-0.0709665	-0.0923402	0.0468403	-0.0528949	-0.00144342	0.970776	0.835962	0.843871	0.9931	0.97151	0.994541
Cacybp	4.02289e+07	0.993	1.013	0.969	1.074	0.986	1.071	-0.0101344	0.0186342	-0.0454314	0.102994	-0.0203404	0.0989585	0.991684	0.986323	0.949536	0.951771	0.973626	0.873511
Cd9	5.13539e+07	1.192	0.963	1.071	1.159	0.761	0.792	0.253384	-0.0543923	0.0989585	0.212881	-0.394032	-0.336428	0.0320655	0.898166	0.878932	0.462354	0.0214821	0.0156767
Anxa6	1.01613e+08	0.993	1.031	1.052	1.103	0.976	1.067	-0.0101344	0.0440443	0.0731347	0.141433	-0.0350469	0.0935602	0.980211	0.916723	0.862602	0.818241	0.988875	0.876834
Gm5157	6.5081e+07	1.359	0.898	1.254	1.372	0.722	0.953	0.442545	-0.155213	0.326537	0.45628	-0.469929	-0.0694519	2.25642e-06	0.370366	0.0397	0.00172777	0.00253932	0.8829
Ate1	2.85609e+06	0.994	1.097	1.026	0.899	1.061	1.02	-0.00868224	0.133564	0.0370307	-0.153607	0.0854247	0.0285692	0.99982	0.927976	0.99674	0.841181	0.932425	0.994515
Camkk2	1.14215e+07	0.994	0.982	0.97	0.945	1.04	0.926	-0.00868224	-0.0262051	-0.0439433	-0.0816138	0.0565835	-0.110916	0.99982	0.966572	0.95288	0.869039	0.944926	0.855129
Hapln1	1.3002e+08	0.994	1.016	1.006	0.961	0.916	0.935	-0.00868224	0.0229004	0.00863031	-0.0573917	-0.12658	-0.0969617	0.974209	0.958655	0.978248	0.759258	0.673974	0.632493
Cyc1	5.53561e+08	0.994	1.092	1.075	0.991	1.056	0.989	-0.00868224	0.126973	0.104337	-0.013043	0.0786098	-0.0159576	0.961212	0.248955	0.708261	0.910524	0.67545	0.957028
Asah1	1.31896e+07	0.994	0.936	0.96	1.004	1.011	1.027	-0.00868224	-0.0954196	-0.0588937	0.00575927	0.015783	0.0384362	0.98609	0.854036	0.933901	0.952431	0.964994	0.986715
Mmut	1.58104e+08	0.994	1.044	0.997	1.009	1.113	1.089	-0.00868224	0.0621217	-0.00433459	0.0129262	0.154454	0.123004	0.96641	0.825288	0.997892	0.969814	0.269486	0.647176
Chga	1.30369e+06	0.994	0.894	0.857	1.012	1.15	1.166	-0.00868224	-0.161653	-0.222633	0.0172093	0.201634	0.221568	0.994303	0.901835	0.794714	0.960526	0.81678	0.911278
Relch	3.98925e+07	0.994	1.085	1.096	1.014	0.962	1.018	-0.00868224	0.117695	0.132248	0.0200577	-0.0558912	0.0257376	0.992202	0.720978	0.828632	0.960526	0.996435	0.986715
Txnrd2	8.70443e+06	0.994	0.914	0.913	1.034	1.009	1.115	-0.00868224	-0.129734	-0.131313	0.0482362	0.0129262	0.157044	0.99982	0.805423	0.840235	0.994798	0.973626	0.844948
Gphn	1.33824e+08	0.994	0.982	0.99	1.046	0.909	0.96	-0.00868224	-0.0262051	-0.0144996	0.0648829	-0.137648	-0.0588937	0.972794	0.96515	0.992226	0.960526	0.623219	0.853156
Cyp2d22	2.9498e+06	0.994	1.142	1.183	1.073	0.898	1.034	-0.00868224	0.191563	0.24245	0.10165	-0.155213	0.0482362	0.99982	0.896839	0.802894	0.989425	0.946305	0.999853
Nckap1	3.89648e+08	0.994	0.948	0.945	1.082	0.932	1.017	-0.00868224	-0.077041	-0.0816138	0.1137	-0.101598	0.0243197	0.961212	0.764899	0.856346	0.819929	0.802622	0.986715
Ndrg2	5.61534e+08	0.994	1.004	0.992	1.09	0.955	1.035	-0.00868224	0.00575927	-0.011588	0.124328	-0.0664274	0.0496308	0.961465	0.974827	0.994663	0.777855	0.933686	0.95009
Ehd1	2.83043e+07	0.994	0.969	0.989	1.091	0.935	1.005	-0.00868224	-0.0454314	-0.0159576	0.125651	-0.0969617	0.0071955	0.99271	0.925063	0.973644	0.874319	0.94865	0.999548
Nd5	3.17464e+07	1.213	1.076	1.257	1.392	0.726	1.008	0.27858	0.105678	0.329985	0.477159	-0.461959	0.0114956	0.0330774	0.848168	0.135971	0.0129745	0.0346063	0.999548
Pals2	6.2346e+07	0.994	1.021	1.009	1.125	1.016	1.145	-0.00868224	0.0299829	0.0129262	0.169925	0.0229004	0.195348	0.99271	0.95834	0.975048	0.728122	0.913952	0.439231
Blmh	6.16427e+07	0.994	1.023	0.978	1.141	0.845	0.955	-0.00868224	0.0328061	-0.0320936	0.190299	-0.242977	-0.0664274	0.991684	0.956463	0.973644	0.617895	0.408262	0.890011
Tsg101	1.42075e+07	0.994	1.056	1.068	1.157	0.964	1.071	-0.00868224	0.0786098	0.0949116	0.210389	-0.0528949	0.0989585	0.987393	0.926868	0.930634	0.866538	0.973626	0.931364
Slc25a42	1.94034e+06	0.995	1.045	1.011	0.927	1.076	1.039	-0.00723157	0.0635029	0.015783	-0.109359	0.105678	0.0551957	0.991684	0.978579	0.980665	0.884113	0.908834	0.999853
Diras1	2.18213e+07	0.995	1.061	1.066	0.937	0.974	0.929	-0.00723157	0.0854247	0.0922074	-0.093879	-0.0380063	-0.106249	0.994303	0.901835	0.905873	0.734409	0.993381	0.785252
Ppp1r9b	1.30242e+08	0.995	0.946	0.948	0.962	0.997	0.956	-0.00723157	-0.0800879	-0.077041	-0.0558912	-0.00433459	-0.0649175	0.977028	0.781224	0.88157	0.79213	0.972921	0.840078
Tubb2a	2.84182e+10	0.995	0.929	0.932	1.002	1.021	1.043	-0.00723157	-0.106249	-0.101598	0.00288251	0.0299829	0.0607392	0.962387	0.552228	0.778222	0.951614	0.904867	0.923628
Rbbp4	2.29754e+07	0.887	1.021	0.884	0.897	1.01	0.803	-0.172994	0.0299829	-0.177882	-0.15682	0.0143553	-0.316528	0.426976	0.985424	0.564719	0.327017	0.944926	0.0623989
Ivd	1.37609e+08	0.995	1.018	1.021	1.007	0.996	0.995	-0.00723157	0.0257376	0.0299829	0.0100637	-0.00578235	-0.00723157	0.978235	0.943361	0.955295	0.965617	0.973626	0.977734
Sptbn2	1.3263e+09	0.995	1.006	1.003	1.014	0.984	1	-0.00723157	0.00863031	0.00432161	0.0200577	-0.0232698	0	0.963383	0.969211	0.986827	0.986587	0.999918	0.985307
Srsf1	3.94778e+07	0.995	1.01	1.047	1.021	0.926	0.909	-0.00723157	0.0143553	0.0662614	0.0299829	-0.110916	-0.137648	0.99396	0.998109	0.944617	0.982392	0.930549	0.649493
Slc6a1	3.19411e+08	0.995	0.949	0.941	1.022	0.928	0.972	-0.00723157	-0.07552	-0.0877334	0.0313952	-0.107803	-0.0409718	0.967705	0.778698	0.840235	0.994798	0.774642	0.901509
Bcan	4.39016e+08	0.995	1.026	1.023	1.042	0.871	0.924	-0.00723157	0.0370307	0.0328061	0.0593553	-0.199255	-0.114035	0.961465	0.896839	0.948373	0.966595	0.245736	0.532756
Gars1	1.38555e+08	0.995	0.909	0.915	1.042	0.95	0.964	-0.00723157	-0.137648	-0.128156	0.0593553	-0.0740006	-0.0528949	0.972644	0.335487	0.671876	0.974391	0.933686	0.876834
Slc4a10	1.46605e+08	0.995	1.033	1.035	1.09	0.868	0.932	-0.00723157	0.0468403	0.0496308	0.124328	-0.204233	-0.101598	0.972063	0.896839	0.919099	0.827225	0.371713	0.691002
Hnrnpc	8.96282e+07	0.995	0.902	0.885	1.1	0.985	1.093	-0.00723157	-0.148801	-0.176251	0.137504	-0.0218044	0.128293	0.987198	0.335051	0.487177	0.794	0.987609	0.713634
Rpn2	3.79374e+07	0.995	1.038	1.052	1.117	0.967	1.071	-0.00723157	0.0538064	0.0731347	0.159629	-0.0484122	0.0989585	0.992929	0.927301	0.933901	0.827225	0.999918	0.865815
Adgrl3	8.67255e+06	0.995	1.168	1.114	1.181	0.866	1.006	-0.00723157	0.22404	0.155749	0.240009	-0.207561	0.00863031	0.99982	0.598405	0.874362	0.827225	0.789415	0.986715
Grin1	5.42287e+07	0.979	1.099	0.997	1.233	0.889	1.058	-0.0306192	0.136191	-0.00433459	0.302173	-0.169745	0.0813396	0.951632	0.569085	0.989372	0.0894024	0.622959	0.890778
Lancl1	7.2494e+07	0.995	1.094	1.131	1.238	0.859	1.071	-0.00723157	0.129613	0.177599	0.308011	-0.21927	0.0989585	0.992929	0.547248	0.482155	0.179167	0.577137	0.876834
Akt3	3.98802e+06	0.995	1.086	1.024	1.372	0.897	1.268	-0.00723157	0.119024	0.0342157	0.45628	-0.15682	0.342555	0.99982	0.929606	0.984874	0.287312	0.886966	0.333385
Abhd12	2.1281e+07	0.991	1.021	0.986	1.251	0.73	0.963	-0.013043	0.0299829	-0.0203404	0.323082	-0.454032	-0.0543923	0.991684	0.979731	0.974924	0.288336	0.0453737	0.929375
Serpina3k	3.24913e+07	0.774	1.188	0.913	0.686	1.214	0.803	-0.369595	0.248535	-0.131313	-0.54372	0.279768	-0.316528	0.000344355	0.0659993	0.758947	3.68196e-06	0.0606913	0.0528124
Psmb4	7.84646e+07	0.996	0.992	0.971	0.98	1.03	0.995	-0.00578235	-0.011588	-0.0424568	-0.0291463	0.0426443	-0.00723157	0.98609	0.984325	0.959937	0.875973	0.886966	0.986715
Nudcd3	1.24358e+06	0.996	0.954	1.054	0.989	1.119	1.086	-0.00578235	-0.0679388	0.0758749	-0.0159576	0.16221	0.119024	0.99982	0.955314	0.977871	0.945585	0.860348	0.982367
Ptprn2	2.52242e+06	0.996	0.895	0.85	0.99	0.996	1.004	-0.00578235	-0.16004	-0.234465	-0.0144996	-0.00578235	0.00575927	0.99982	0.848499	0.674203	0.9663	0.973626	0.986715
Ndufb3	1.13786e+08	0.996	0.927	0.913	0.994	1.001	1.059	-0.00578235	-0.109359	-0.131313	-0.00868224	0.00144197	0.0827026	0.985762	0.610927	0.699028	0.927824	0.958874	0.853156
Phyhip	3.60514e+08	0.996	0.981	0.976	1.003	1.03	1.014	-0.00578235	-0.027675	-0.0350469	0.00432161	0.0426443	0.0200577	0.968461	0.965807	0.961997	0.960384	0.864097	0.991398
Vars	2.42411e+08	0.996	0.975	0.966	1.009	0.879	0.906	-0.00578235	-0.0365259	-0.0499049	0.0129262	-0.186065	-0.142417	0.970221	0.943339	0.936334	0.973449	0.328772	0.353493
Pgk1	2.83087e+09	0.996	0.979	0.973	1.024	1.001	1.024	-0.00578235	-0.0306192	-0.0394883	0.0342157	0.00144197	0.0342157	0.970477	0.961548	0.957735	0.998267	0.964994	0.97844
Carhsp1	7.73626e+06	0.996	0.991	0.982	1.046	1.012	1.057	-0.00578235	-0.013043	-0.0262051	0.0648829	0.0172093	0.0799754	0.99982	0.977338	0.968695	0.99509	0.972921	0.960722
Cox5b	8.72616e+07	1.314	0.963	1.268	0.999	0.838	0.805	0.393965	-0.0543923	0.342555	-0.00144342	-0.254978	-0.312939	2.16915e-05	0.901835	0.0190911	0.920509	0.509016	0.0676675
Ipo5	5.80781e+07	0.996	1.028	1.036	1.069	1.028	1.101	-0.00578235	0.0398403	0.051024	0.0962619	0.0398403	0.138814	0.995192	0.94384	0.931746	0.960526	0.876077	0.75298
Slc7a5	3.57879e+07	1.018	1.175	1.168	1.246	0.733	0.994	0.0257376	0.232661	0.22404	0.317304	-0.448115	-0.00868224	0.961212	0.17816	0.487177	0.153491	0.0106534	0.983612
Mgst3	9.27535e+07	1.048	1.214	1.284	1.462	0.733	1.057	0.0676387	0.279768	0.360645	0.547943	-0.448115	0.0799754	0.795429	0.0117039	0.00949272	1.78628e-05	0.0106534	0.901509
Acadsb	1.66877e+07	0.996	1.091	1.151	1.319	0.776	1.034	-0.00578235	0.125651	0.202888	0.399445	-0.365871	0.0482362	0.98831	0.847606	0.671876	0.21346	0.302385	0.983612
Sirt2	4.84474e+08	1.16	1.033	1.21	1.176	0.888	1.098	0.214125	0.0468403	0.275007	0.233888	-0.171368	0.134878	0.00630159	0.854036	0.0335755	0.157211	0.409825	0.58128
Ube2o	8.46883e+07	0.997	0.942	0.928	0.954	0.977	0.896	-0.00433459	-0.086201	-0.107803	-0.0679388	-0.0335695	-0.158429	0.991684	0.778482	0.802894	0.788433	0.996944	0.501986
Ahsa1	6.33718e+07	0.997	1	0.995	1.015	0.959	0.975	-0.00433459	0	-0.00723157	0.0214797	-0.0603973	-0.0365259	0.997862	0.998945	0.999389	0.984928	0.964994	0.948228
Vdac2	1.62972e+09	0.997	1	1.01	1.018	0.98	1.021	-0.00433459	0	0.0143553	0.0257376	-0.0291463	0.0299829	0.974085	0.985969	0.973644	0.99082	0.989707	0.983612
Gnao1	4.4498e+09	0.997	1.006	1.001	1.023	1.031	1.026	-0.00433459	0.00863031	0.00144197	0.0328061	0.0440443	0.0370307	0.974209	0.969211	0.991875	0.996776	0.854164	0.974224
Ncam1	1.12756e+09	0.997	0.965	0.966	1.036	0.956	0.999	-0.00433459	-0.0513992	-0.0499049	0.051024	-0.0649175	-0.00144342	0.972644	0.901835	0.933901	0.986587	0.933686	0.983612
Gnaq	2.10836e+08	0.997	1.028	1.02	1.041	0.943	1.008	-0.00433459	0.0398403	0.0285692	0.0579701	-0.0846703	0.0114956	0.974085	0.895657	0.955925	0.974391	0.883438	0.999548
Prkar1a	5.94796e+07	0.997	0.897	0.928	1.056	0.946	0.981	-0.00433459	-0.15682	-0.107803	0.0786098	-0.0800879	-0.027675	0.99982	0.359436	0.815566	0.96345	0.959424	0.965709
Ptges2	8.74041e+06	0.997	1.043	1.053	1.067	1.044	1.137	-0.00433459	0.0607392	0.0745054	0.0935602	0.0621217	0.185232	0.99982	0.96315	0.965994	0.9931	0.944926	0.875597
Asap1	7.23302e+06	0.997	1.09	0.968	1.146	0.872	0.971	-0.00433459	0.124328	-0.046921	0.196607	-0.1976	-0.0424568	0.99982	0.888085	0.953296	0.866538	0.803543	0.95009
Sec24b	5.10855e+06	0.997	1.145	1.145	1.298	0.951	1.225	-0.00433459	0.195348	0.195348	0.37629	-0.0724828	0.292782	0.99982	0.822834	0.804912	0.646628	0.972936	0.516451
Fkbp3	2.22853e+07	1.061	1.078	1.138	1.267	0.776	0.807	0.0854247	0.108357	0.186501	0.341417	-0.365871	-0.309359	0.810025	0.862178	0.656912	0.281692	0.168154	0.0813009
Atp2b3	1.52115e+06	0.997	1.153	0.981	1.567	0.583	0.969	-0.00433459	0.205393	-0.027675	0.648005	-0.778432	-0.0454314	0.992929	0.888141	0.968695	0.326985	0.102237	0.949218
Cmpk2	5.58103e+06	0.998	1.067	0.916	0.931	1.145	1.035	-0.00288828	0.0935602	-0.12658	-0.103147	0.195348	0.0496308	0.992929	0.923039	0.850885	0.866538	0.731524	0.986715
Pvalb	6.85496e+07	0.998	1.105	1.049	0.938	1.004	0.975	-0.00288828	0.144046	0.0690147	-0.0923402	0.00575927	-0.0365259	0.99982	0.490571	0.87948	0.634887	0.944926	0.945975
Bcas1	1.14393e+08	0.998	1.037	1.031	0.956	0.995	0.927	-0.00288828	0.0524159	0.0440443	-0.0649175	-0.00723157	-0.109359	0.98769	0.901835	0.930634	0.772543	0.973626	0.605775
Hspa8	6.38e+09	0.998	0.932	0.926	0.972	1.062	1.035	-0.00288828	-0.101598	-0.110916	-0.0409718	0.0867838	0.0496308	0.980211	0.57501	0.733481	0.827225	0.635681	0.948319
Sgta	2.14644e+07	0.998	1.041	1.039	0.99	1.031	1.059	-0.00288828	0.0579701	0.0551957	-0.0144996	0.0440443	0.0827026	0.996886	0.949139	0.958065	0.920509	0.933686	0.931364
Dnajc6	2.50244e+08	0.998	0.993	0.992	1.006	0.978	0.995	-0.00288828	-0.0101344	-0.011588	0.00863031	-0.0320936	-0.00723157	0.978499	0.998187	0.993528	0.963385	0.985591	0.977734
Exoc7	3.88857e+06	0.998	0.971	1.101	1.011	0.969	1.001	-0.00288828	-0.0424568	0.138814	0.015783	-0.0454314	0.00144197	0.996042	0.95354	0.892055	0.986587	0.996944	0.986715
Tuba4a	3.28193e+09	0.998	1.018	1.005	1.014	0.962	0.985	-0.00288828	0.0257376	0.0071955	0.0200577	-0.0558912	-0.0218044	0.979938	0.923039	0.983175	0.986587	0.952109	0.9469
Stxbp1	6.32516e+09	0.998	0.966	0.971	1.024	0.958	0.98	-0.00288828	-0.0499049	-0.0424568	0.0342157	-0.0619024	-0.0291463	0.978235	0.901835	0.954818	0.998978	0.944926	0.931364
Arpc3	6.27468e+07	0.998	1.103	1.081	1.036	0.915	0.959	-0.00288828	0.141433	0.112367	0.051024	-0.128156	-0.0603973	0.99982	0.482371	0.768112	0.994798	0.867366	0.901509
Dync1h1	2.49752e+09	0.998	0.974	0.969	1.037	0.93	0.969	-0.00288828	-0.0380063	-0.0454314	0.0524159	-0.104697	-0.0454314	0.978332	0.936685	0.948741	0.98377	0.792608	0.890011
Psma7	7.91874e+07	0.998	1.13	1.112	1.062	0.958	0.998	-0.00288828	0.176323	0.153157	0.0867838	-0.0619024	-0.00288828	0.996273	0.231222	0.58091	0.952431	0.978761	0.986715
Skp1	1.03418e+08	0.998	1.135	1.138	1.123	0.983	1.132	-0.00288828	0.182692	0.186501	0.167358	-0.0247367	0.178874	0.991684	0.184136	0.36817	0.75952	0.973626	0.554441
Tsc1	2.73231e+06	0.998	0.966	1.07	1.138	0.908	1.125	-0.00288828	-0.0499049	0.0976108	0.186501	-0.139236	0.169925	0.99982	0.966572	0.963404	0.946909	0.960082	0.92136
Ndufs2	3.96639e+08	0.998	1.02	1.042	1.163	0.886	1.006	-0.00288828	0.0285692	0.0593553	0.217851	-0.174621	0.00863031	0.979278	0.91434	0.885573	0.222522	0.386331	0.994541
Pzp	1.19068e+08	0.819	1.122	0.89	0.81	0.993	0.81	-0.288065	0.166073	-0.168123	-0.304006	-0.0101344	-0.304006	0.000226736	0.184136	0.497151	0.00824908	0.973626	0.00469768
Pdpk1	8.27497e+06	0.998	1.146	1.092	1.343	0.804	0.986	-0.00288828	0.196607	0.126973	0.425459	-0.314733	-0.0203404	0.99982	0.738997	0.919702	0.45854	0.501406	0.965709
Epb41l2	2.87019e+07	1.051	0.957	1.018	0.994	0.811	0.816	0.0717627	-0.0634092	0.0257376	-0.00868224	-0.302226	-0.293359	0.863649	0.896839	0.984824	0.919106	0.341407	0.0983779
Atox1	6.78495e+07	0.999	1.112	1.114	0.9	1.185	1.124	-0.00144342	0.153157	0.155749	-0.152003	0.244887	0.168642	0.99982	0.413547	0.539292	0.304954	0.126223	0.567652
Fkbp4	5.85088e+07	0.999	0.934	0.947	0.911	1.194	1.08	-0.00144342	-0.0985055	-0.0785637	-0.134477	0.255803	0.111031	0.99982	0.721302	0.890607	0.397804	0.104485	0.822908
Endod1	6.31824e+07	0.999	0.893	0.928	0.919	0.924	0.891	-0.00144342	-0.163268	-0.107803	-0.121863	-0.114035	-0.166503	0.99982	0.280356	0.802597	0.466663	0.844714	0.442608
Csde1	2.52487e+07	0.999	1.013	0.972	0.941	1.038	0.975	-0.00144342	0.0186342	-0.0409718	-0.0877334	0.0538064	-0.0365259	0.99982	0.995729	0.955295	0.727531	0.876895	0.95009
Alcam	1.09494e+08	0.999	0.978	0.977	0.99	1.005	0.997	-0.00144342	-0.0320936	-0.0335695	-0.0144996	0.0071955	-0.00433459	0.992409	0.952657	0.973644	0.908089	0.957576	0.986715
Eif1	2.89387e+06	0.999	1.252	1.165	0.99	1.423	1.156	-0.00144342	0.324235	0.22033	-0.0144996	0.508936	0.209141	0.99982	0.665295	0.847893	0.963083	0.239539	0.909449
Inpp4a	4.48581e+07	0.999	0.961	0.988	0.991	1.069	1.077	-0.00144342	-0.0573917	-0.0174171	-0.013043	0.0962619	0.107018	0.99982	0.90357	0.973644	0.898241	0.656493	0.860846
Tardbp	1.0553e+08	0.999	0.997	0.988	1.024	0.962	0.985	-0.00144342	-0.00433459	-0.0174171	0.0342157	-0.0558912	-0.0218044	0.99271	0.998187	0.989372	0.997778	0.972921	0.968101
Crmp1	1.38829e+09	0.999	0.958	0.961	1.025	0.986	1.031	-0.00144342	-0.0619024	-0.0573917	0.0356239	-0.0203404	0.0440443	0.982456	0.868407	0.922299	0.999873	0.996944	0.959122
Rab3c	2.65459e+08	1.114	0.972	1.046	1.017	0.847	0.841	0.155749	-0.0409718	0.0648829	0.0243197	-0.239566	-0.249822	0.0969128	0.929591	0.874488	0.987164	0.0982833	0.0231669
Dnm1l	1.41817e+07	0.999	1.013	1.011	1.08	0.905	1.004	-0.00144342	0.0186342	0.015783	0.111031	-0.14401	0.00575927	0.99982	0.998187	0.997779	0.960526	0.904099	0.986715
Snap91	1.00629e+09	0.999	1.051	1.047	1.081	0.979	1.057	-0.00144342	0.0717627	0.0662614	0.112367	-0.0306192	0.0799754	0.984143	0.678417	0.868616	0.825748	0.987609	0.876834
Slc8a1	7.25814e+07	0.999	1.059	1.076	1.09	0.866	0.945	-0.00144342	0.0827026	0.105678	0.124328	-0.207561	-0.0816138	0.996421	0.822834	0.783291	0.82935	0.359226	0.818322
Ralgapb	4.82673e+06	0.999	0.903	1.037	1.188	0.943	1.147	-0.00144342	-0.147202	0.0524159	0.248535	-0.0846703	0.197865	0.994303	0.855058	0.973644	0.884082	0.973626	0.864002
Rer1	4.21789e+06	0.999	1.007	1.142	1.19	0.858	1	-0.00144342	0.0100637	0.191563	0.250962	-0.22095	0	0.996042	0.996444	0.843871	0.881742	0.789849	0.982184
Washc5	453386	0.999	1.037	1.047	1.375	0.884	1.012	-0.00144342	0.0524159	0.0662614	0.459432	-0.177882	0.0172093	0.99982	0.999791	0.99772	0.896267	0.973626	0.986715
Atp5pb	3.36712e+08	1.142	1.128	1.219	1.245	0.916	1.075	0.191563	0.173767	0.285698	0.316146	-0.12658	0.104337	0.0221588	0.0602306	0.0236203	0.0143642	0.673974	0.766659
	1.22095e+10	0.965	1.018	0.975	1.015	0.83	0.848	-0.0513992	0.0257376	-0.0365259	0.0214797	-0.268817	-0.237864	0.77021	0.924949	0.959937	0.987083	0.043581	0.0344566
Ap2m1	523921	1	1.558	1.646	0.943	1.57	1.552	0	0.639695	0.718964	-0.0846703	0.650765	0.634129	0.996042	0.381253	0.394849	0.896997	0.252319	0.233055
Pmpcb	3.49441e+06	1	1.192	1.236	0.968	0.876	0.795	0	0.253384	0.305679	-0.046921	-0.190997	-0.330973	0.994303	0.682384	0.582363	0.94807	0.847078	0.285419
Prkar2a	1.58517e+08	1	0.95	0.934	0.99	0.958	0.957	0	-0.0740006	-0.0985055	-0.0144996	-0.0619024	-0.0634092	0.991522	0.798662	0.802597	0.907207	0.952109	0.854132
Srsf7	3.17291e+07	1	0.931	1.014	0.993	0.992	0.932	0	-0.103147	0.0200577	-0.0101344	-0.011588	-0.101598	0.997862	0.738997	0.992226	0.908089	0.960082	0.798416
Dpysl4	3.47319e+08	1	0.975	0.997	0.995	1.022	1.028	0	-0.0365259	-0.00433459	-0.00723157	0.0313952	0.0398403	0.98609	0.943315	0.997892	0.928729	0.90014	0.968758
Tomm70a	3.08419e+08	1	1.005	1.021	1.001	0.993	1.056	0	0.0071955	0.0299829	0.00144197	-0.0101344	0.0786098	0.985762	0.97273	0.954421	0.947708	0.975091	0.878939
Fhl1	4.48554e+07	1	0.993	0.967	1.007	0.999	1.001	0	-0.0101344	-0.0484122	0.0100637	-0.00144342	0.00144197	0.99982	0.983131	0.933901	0.94807	0.952109	0.986715
Eif4a2	1.52703e+08	1	1.058	1.06	1.033	1.077	1.128	0	0.0813396	0.0840643	0.0468403	0.107018	0.173767	0.98609	0.671131	0.823666	0.99082	0.544964	0.34686
Srsf4	1.2453e+08	1.018	1.019	1.029	1.034	0.855	0.848	0.0257376	0.0271541	0.041243	0.0482362	-0.226004	-0.237864	0.959136	0.952657	0.933901	0.99149	0.248516	0.0696345
Wdr7	3.67249e+08	1	0.984	0.992	1.056	0.994	1.066	0	-0.0232698	-0.011588	0.0786098	-0.00868224	0.0922074	0.985762	0.974068	0.993528	0.926797	0.973626	0.835242
Ak1	3.1727e+08	1	1.063	1.072	1.082	0.925	0.987	0	0.0881416	0.100305	0.1137	-0.112475	-0.018878	0.98609	0.559442	0.723684	0.821613	0.755758	0.95009
Ipo7	6.0985e+07	1	1.013	1.024	1.094	0.977	1.079	0	0.0186342	0.0342157	0.129613	-0.0335695	0.109695	0.99982	0.977198	0.95288	0.866131	0.983546	0.820751
Tspan2	7.63298e+07	0.967	1.196	1.132	0.959	0.853	0.854	-0.0484122	0.258217	0.178874	-0.0603973	-0.229382	-0.227692	0.885085	0.0162951	0.416333	0.796399	0.313458	0.129413
Pafah1b2	1.03159e+08	1	1.114	1.177	1.123	1.063	1.174	0	0.155749	0.235114	0.167358	0.0881416	0.231432	0.99982	0.3254	0.138188	0.731685	0.738704	0.276839
Slain1	1.82984e+08	0.854	1.308	1.03	1.159	0.734	0.869	-0.227692	0.387363	0.0426443	0.212881	-0.446148	-0.202572	0.000994453	1.50452e-07	0.932045	0.25037	2.30927e-05	0.0959391
Ywhag	1.01912e+09	0.964	1.316	1.289	1.02	1.168	1.173	-0.0528949	0.396159	0.366252	0.0285692	0.22404	0.230203	0.765961	4.17272e-08	0.00127235	0.993885	0.041924	0.0990712
Rpl6	1.42636e+08	1.001	0.951	0.957	0.894	0.978	0.909	0.00144197	-0.0724828	-0.0634092	-0.161653	-0.0320936	-0.137648	0.992929	0.822834	0.915769	0.172755	0.987524	0.390016
Eif4b	7.37088e+07	1.001	0.981	0.973	0.912	0.966	0.897	0.00144197	-0.027675	-0.0394883	-0.132894	-0.0499049	-0.15682	0.998876	0.95834	0.961997	0.490088	0.973626	0.501166
Csl	4.5434e+07	1.017	1.22	1.276	1.311	0.737	0.95	0.0243197	0.286881	0.351628	0.390668	-0.440263	-0.0740006	0.961212	0.0458295	0.0828337	0.0438215	0.0112193	0.885167
Dnajc13	1.02397e+06	1.001	0.94	0.973	0.957	1.012	0.969	0.00144197	-0.0892673	-0.0394883	-0.0634092	0.0172093	-0.0454314	0.99982	0.932059	0.963041	0.910524	0.97111	0.951167
Coro1c	1.61345e+08	1.001	0.962	0.969	0.98	0.933	0.933	0.00144197	-0.0558912	-0.0454314	-0.0291463	-0.100051	-0.100051	0.98609	0.896839	0.940855	0.866538	0.812723	0.618166
Hnrnpll	1.8109e+07	1.001	0.929	0.901	0.982	1.035	1.017	0.00144197	-0.106249	-0.150401	-0.0262051	0.0496308	0.0243197	0.996042	0.826197	0.735093	0.880928	0.90014	0.990916
Tst	1.04578e+08	1.001	1.017	1.027	1.016	1.031	1.046	0.00144197	0.0243197	0.0384362	0.0229004	0.0440443	0.0648829	0.99982	0.964336	0.943445	0.987083	0.883427	0.92228
Rpn1	8.35962e+07	1.001	0.963	0.957	1.025	1.01	1.033	0.00144197	-0.0543923	-0.0634092	0.0356239	0.0143553	0.0468403	0.99982	0.901835	0.92254	0.99749	0.944926	0.957483
Slc30a3	7.0416e+07	0.986	1.155	1.113	1.223	0.738	0.926	-0.0203404	0.207893	0.154454	0.290424	-0.438307	-0.110916	0.970744	0.161829	0.555928	0.282075	0.0137268	0.75231
Rps15	5.93455e+07	1.001	0.974	1.017	1.031	0.936	0.982	0.00144197	-0.0380063	0.0243197	0.0440443	-0.0954196	-0.0262051	0.996722	0.935193	0.966763	0.997778	0.936376	0.958548
Actr3b	5.76269e+07	1.001	0.98	0.981	1.036	1.009	1.059	0.00144197	-0.0291463	-0.027675	0.051024	0.0129262	0.0827026	0.997862	0.95354	0.971043	0.9931	0.947773	0.890778
Usp5	3.24277e+08	1.001	0.967	0.98	1.038	0.916	0.964	0.00144197	-0.0484122	-0.0291463	0.0538064	-0.12658	-0.0528949	0.991684	0.90357	0.968695	0.977036	0.673974	0.874289
COX2	7.00308e+08	1.001	0.973	0.963	1.069	0.952	1.018	0.00144197	-0.0394883	-0.0543923	0.0962619	-0.0709665	0.0257376	0.987198	0.932059	0.929657	0.866538	0.923707	0.986715
Kpnb1	1.53352e+08	1.001	1.078	1.098	1.174	0.923	1.083	0.00144197	0.108357	0.134878	0.231432	-0.115597	0.115033	0.991684	0.492929	0.600827	0.291777	0.81627	0.695287
Prkaa2	1.42814e+06	1.001	1.035	1.041	1.243	0.878	1.187	0.00144197	0.0496308	0.0579701	0.313826	-0.187707	0.24732	0.992929	0.985698	0.99674	0.827225	0.938974	0.854132
Olfm2	1.37804e+06	1.002	0.928	0.911	0.01	100		0.00288251	-0.107803	-0.134477	-6.64386	6.64386	#VALUE!	0.997862	0.932059	0.892055	2.67297e-16	2.21282e-16
Chl1	580175	1.002	0.847	0.822	0.907	1.104	0.991	0.00288251	-0.239566	-0.28279	-0.140826	0.14274	-0.013043	0.99982	0.81512	0.768112	0.864543	0.887404	0.977734
Acadvl	3.08276e+07	1.002	1.062	1.104	0.926	1.012	0.928	0.00288251	0.0867838	0.14274	-0.110916	0.0172093	-0.107803	0.992073	0.895657	0.801372	0.573666	0.924845	0.783196
Tiprl	2.5745e+07	1.116	1.014	1.098	1.084	0.738	0.826	0.158337	0.0200577	0.134878	0.116365	-0.438307	-0.275786	0.459344	0.995694	0.820573	0.941292	0.0477073	0.129121
Afg3l2	6.34053e+07	1.002	1.037	1.012	0.948	1.037	1.007	0.00288251	0.0524159	0.0172093	-0.077041	0.0524159	0.0100637	0.992929	0.915338	0.973644	0.702058	0.849457	0.999853
Gdi1	2.37875e+09	1.002	0.982	0.99	1.009	0.975	0.974	0.00288251	-0.0262051	-0.0144996	0.0129262	-0.0365259	-0.0380063	0.991684	0.969211	0.989372	0.974391	0.975984	0.903281
Pfkm	9.96576e+08	1.002	0.976	0.982	1.009	0.995	0.993	0.00288251	-0.0350469	-0.0262051	0.0129262	-0.00723157	-0.0101344	0.991684	0.949714	0.973644	0.973529	0.973626	0.969627
Ccny	1.07831e+07	1.002	0.904	0.908	1.01	1.079	1.097	0.00288251	-0.145605	-0.139236	0.0143553	0.109695	0.133564	0.997097	0.717242	0.802597	0.968651	0.831974	0.876834
Rab10	1.39343e+08	1.002	1.016	1.033	1.023	1.039	1.074	0.00288251	0.0229004	0.0468403	0.0328061	0.0551957	0.102994	0.99982	0.95748	0.923434	0.994798	0.811663	0.753507
	1.54087e+07	1.002	0.934	0.975	1.04	0.994	1.067	0.00288251	-0.0985055	-0.0365259	0.0565835	-0.00868224	0.0935602	0.99982	0.852214	0.959937	0.994798	0.967671	0.893649
Gnaz	1.81937e+08	1.002	0.968	0.984	1.046	0.933	0.981	0.00288251	-0.046921	-0.0232698	0.0648829	-0.100051	-0.027675	0.992073	0.911823	0.973718	0.960526	0.81627	0.934479
Cul3	5.20039e+07	1.002	0.993	0.997	1.07	0.953	0.989	0.00288251	-0.0101344	-0.00433459	0.0976108	-0.0694519	-0.0159576	0.996042	0.985698	0.992578	0.936955	0.973626	0.977734
Dusp3	7.95953e+07	1.002	1.088	1.099	1.071	0.963	1.08	0.00288251	0.121679	0.136191	0.0989585	-0.0543923	0.111031	0.99982	0.570822	0.634268	0.919329	0.973626	0.806532
Slc8a2	3.72971e+08	1.002	1.026	1.033	1.087	0.897	0.971	0.00288251	0.0370307	0.0468403	0.120352	-0.15682	-0.0424568	0.992929	0.896839	0.920351	0.791195	0.49557	0.897996
	836811	1.002	1.045	1.052	1.192	0.783	0.96	0.00288251	0.0635029	0.0731347	0.253384	-0.352916	-0.0588937	0.99982	0.987121	0.991556	0.923801	0.774642	0.941263
Cuta	5.89112e+06	1.003	1.118	1.113	0.956	0.869	0.868	0.00432161	0.16092	0.154454	-0.0649175	-0.202572	-0.204233	0.99026	0.855058	0.878768	0.93327	0.858056	0.710913
Snx27	2.66659e+07	1.003	1.008	1.002	0.98	1.006	0.96	0.00432161	0.0114956	0.00288251	-0.0291463	0.00863031	-0.0588937	0.99396	0.999791	0.991875	0.866538	0.937512	0.919478
Abhd16a	1.86103e+07	1.003	0.946	0.925	0.992	1.015	0.996	0.00432161	-0.0800879	-0.112475	-0.011588	0.0214797	-0.00578235	0.992929	0.883123	0.851013	0.913625	0.936376	0.986715
Camk2a	4.11123e+09	1.003	0.977	0.975	1	0.99	0.999	0.00432161	-0.0335695	-0.0365259	0	-0.0144996	-0.00144342	0.992929	0.952614	0.961115	0.945585	0.985431	0.984028
Pde6d	2.8062e+06	1.003	0.943	0.936	1	0.969	0.957	0.00432161	-0.0846703	-0.0954196	0	-0.0454314	-0.0634092	0.996886	0.927868	0.919099	0.974391	0.999918	0.934479
Rad23b	8.04806e+07	1.003	0.957	0.972	1.006	0.901	0.944	0.00432161	-0.0634092	-0.0409718	0.00863031	-0.150401	-0.0831412	0.99982	0.881979	0.959937	0.960526	0.708132	0.850356
Ube4b	170340	1.003	0.928	0.936	1.012	1.164	1.22	0.00432161	-0.107803	-0.0954196	0.0172093	0.219091	0.286881	0.99982	0.930885	0.955295	0.963385	0.859905	0.901509
Slc25a4	4.77612e+09	1.003	0.981	0.975	1.015	0.988	1.009	0.00432161	-0.027675	-0.0365259	0.0214797	-0.0174171	0.0129262	0.992929	0.966572	0.961997	0.987083	0.98981	0.999853
Cct4	3.87956e+08	1.003	0.973	0.966	1.016	0.999	1.028	0.00432161	-0.0394883	-0.0499049	0.0229004	-0.00144342	0.0398403	0.996042	0.936046	0.933901	0.987083	0.97151	0.968758
Glud1	1.8583e+09	1.003	0.965	0.977	1.019	1.049	1.047	0.00432161	-0.0513992	-0.0335695	0.0271541	0.0690147	0.0662614	0.992929	0.901835	0.965994	0.992549	0.734509	0.910985
Eno2	2.27108e+09	1.198	1.001	1.21	1.069	1.097	1.165	0.260628	0.00144197	0.275007	0.0962619	0.133564	0.22033	0.000304311	0.985698	0.033635	0.866538	0.359106	0.122105
Ap2a1	2.29534e+09	1.003	1.006	0.99	1.037	1.024	1.074	0.00432161	0.00863031	-0.0144996	0.0524159	0.0342157	0.102994	0.992929	0.969211	0.989372	0.982417	0.88795	0.778512
Sccpdh	5.55361e+07	1.003	0.9	0.928	1.047	0.969	1.058	0.00432161	-0.152003	-0.107803	0.0662614	-0.0454314	0.0813396	0.992929	0.37976	0.782028	0.987083	0.993381	0.908186
Gnas	1.07209e+08	1.003	1.002	0.998	1.068	0.861	0.933	0.00432161	0.00288251	-0.00288828	0.0949116	-0.215915	-0.100051	0.99982	0.998187	0.992578	0.927195	0.408315	0.780316
Oga	1.48483e+07	1.003	0.997	1.008	1.075	0.911	1.017	0.00432161	-0.00433459	0.0114956	0.104337	-0.134477	0.0243197	0.996042	0.988849	0.99772	0.96452	0.923707	0.999853
Cand1	6.0098e+08	1.003	0.999	1.011	1.085	0.991	1.08	0.00432161	-0.00144342	0.015783	0.117695	-0.013043	0.111031	0.992929	0.989292	0.973644	0.799683	0.980338	0.725069
Git1	9.38441e+07	1.003	1	0.998	1.1	0.878	0.929	0.00432161	0	-0.00288828	0.137504	-0.187707	-0.106249	0.997211	0.999791	0.996138	0.787118	0.465476	0.687037
Palm	5.40178e+07	1.003	0.921	0.924	1.105	0.947	1.035	0.00432161	-0.118727	-0.114035	0.144046	-0.0785637	0.0496308	0.992929	0.583087	0.793764	0.80462	0.960968	0.957483
Cyfip2	6.16657e+08	1.003	1.018	1.025	1.148	0.859	0.992	0.00432161	0.0257376	0.0356239	0.199123	-0.21927	-0.011588	0.996042	0.923141	0.939592	0.32605	0.167047	0.968101
Snrpd3	1.50137e+07	1.003	0.953	0.951	1.152	0.968	1.089	0.00432161	-0.0694519	-0.0724828	0.204141	-0.046921	0.123004	0.99982	0.901835	0.919639	0.801769	0.988875	0.846171
Eif2b1	555568	1.003	1.403	1.616	1.171	1.039	1.138	0.00432161	0.488515	0.692427	0.227741	0.0551957	0.186501	0.99982	0.584029	0.363707	0.975399	0.944926	0.93687
Aqp4	6.53393e+07	0.93	1.105	1.018	1.163	0.751	0.859	-0.104697	0.144046	0.0257376	0.217851	-0.413115	-0.21927	0.663917	0.474013	0.968695	0.367968	0.00163427	0.117965
Fth1	2.81545e+08	0.938	1.198	1.119	1.05	1.011	1.081	-0.0923402	0.260628	0.16221	0.0703893	0.015783	0.112367	0.43374	0.000959625	0.394466	0.957622	0.932308	0.705517
[truncated: 1,108 more rows]

## Sheet: CTX PTE-
Gene Symbol	Abundances (Grouped): ctx, pte minus	Abundance Ratio: (ctx, pte plus) / (ctx, pte minus)	Abundance Ratio: (ctx, pte minus) / (ctx, sham)	Abundance Ratio: (ctx, pte plus) / (ctx, sham)	Abundance Ratio: (hpc, pte plus) / (hpc, pte minus)	Abundance Ratio: (hpc, pte minus) / (hpc, sham)	Abundance Ratio: (hpc, pte plus) / (hpc, sham)	Log2FC PTE-vPTE+CTX	Log2FCPTE-vSHAMCTX	Log2FCPTE+vSHAMCTX	Log2FC PTE-vPTE+HPC	Log2FCPTE-vSHAMHPC	Log2FCPTE+vSHAMHPC	Abundance Ratio Adj. P-Value: (ctx, pte plus) / (ctx, pte minus)	Abundance Ratio Adj. P-Value: (ctx, pte minus) / (ctx, sham)	Abundance Ratio Adj. P-Value: (ctx, pte plus) / (ctx, sham)	Abundance Ratio Adj. P-Value: (hpc, pte plus) / (hpc, pte minus)	Abundance Ratio Adj. P-Value: (hpc, pte minus) / (hpc, sham)	Abundance Ratio Adj. P-Value: (hpc, pte plus) / (hpc, sham)
Washc1	124871	0.01	1.175	0.01	0.891	1.076	0.949	-6.64386	0.232661	-6.64386	-0.166503	0.105678	-0.07552	2.80253e-16	0.952657	2.92648e-16	0.890835	0.933686	0.947763
Dnajb5	680250	0.01	0.902	0.01	0.899	1.055	0.938	-6.64386	-0.148801	-6.64386	-0.153607	0.077243	-0.0923402	2.80253e-16	0.89745	2.92648e-16	0.842463	0.933686	0.93063
Zng1	268277	0.01	0.717	0.01	1.183	1.138	1.193	-6.64386	-0.479955	-6.64386	0.24245	0.186501	0.254594	2.80253e-16	0.486359	2.92648e-16	0.974593	0.873404	0.901509
Apc	67064.6	0.01	0.537	0.01		0.01	0.01	-6.64386	-0.897006	-6.64386	#VALUE!	-6.64386	-6.64386	2.80253e-16	0.0875201	2.92648e-16		2.21282e-16	2.24357e-16
Mvp	182534	0.01	1.906	0.01	1.277	0.619	0.915	-6.64386	0.930548	-6.64386	0.352759	-0.691989	-0.128156	2.80253e-16	0.160535	2.92648e-16	0.947677	0.609109	0.916663
Kcnn2	326881	0.01	1.207	0.01	0.446	2.282	0.98	-6.64386	0.271426	-6.64386	-1.16488	1.1903	-0.0291463	2.80253e-16	0.901835	2.92648e-16	0.0100355	0.00647609	0.972006
Atp1a4	2.50739e+06	1.159	0.69	0.804	0.582	100	100	0.212881	-0.535332	-0.314733	-0.780909	6.64386	6.64386	0.747466	0.0701977	0.500255	0.0243257	2.21282e-16	2.24357e-16
Ccdc22	398972	0.859	0.693	0.589	1.644	0.467	0.75	-0.21927	-0.529073	-0.76366	0.71721	-1.09851	-0.415037	0.844709	0.39668	0.126441	0.582108	0.0704984	0.433503
Nhsl1	236467	0.927	0.942	0.869	0.83	1.014	0.841	-0.109359	-0.086201	-0.202572	-0.268817	0.0200577	-0.249822	0.94135	0.943167	0.885573	0.771504	0.958874	0.769657
Limd2	2.55023e+06	0.972	100	100	0.507	3.101	1.817	-0.0409718	6.64386	6.64386	-0.979942	1.63273	0.861558	0.976252	3.30088e-16	2.92648e-16	0.00433779	2.69125e-10	0.00602465
Appl2	320027	1.273	1.198	1.504	1.432	0.896	1.242	0.348232	0.260628	0.588805	0.518031	-0.158429	0.312665	0.70445	0.904584	0.633491	0.827225	0.990694	0.850356
Vmn1r125	304966	1.915	1.501	3.085	2.652	0.596	1.091	0.937344	0.585924	1.62527	1.40708	-0.746616	0.125651	0.0187209	0.547397	0.00101146	0.078934	0.536817	0.982184
Ndufa3	2.31942e+06	2.099	1.397	3.106	1.212	1.16	1.325	1.0697	0.482332	1.63506	0.27739	0.214125	0.405992	1.05133e-07	0.306099	3.63567e-13	0.866538	0.774642	0.436851
Pgk2	1.76086e+07	1.208	0.711	0.843	0.966	0.794	0.783	0.27262	-0.492079	-0.246395	-0.0499049	-0.332789	-0.352916	0.0999769	0.000849471	0.385308	0.865136	0.313235	0.0385476
Vwa8	96743.7	0.87	0.906	0.77	0.873	0.871	0.759	-0.200913	-0.142417	-0.37707	-0.195946	-0.199255	-0.397828	0.912151	0.901835	0.78627	0.87385	0.973626	0.625912
Fam120c	1.71256e+06	0.918	1.034	0.888	0.958	100	100	-0.123434	0.0482362	-0.171368	-0.0619024	6.64386	6.64386	0.898128	0.988767	0.840755	0.928936	2.21282e-16	2.24357e-16
Atg4c	187706	1.152	1.105	1.115	1.272	100	100	0.204141	0.144046	0.157044	0.347099	6.64386	6.64386	0.894717	0.974827	0.973644	0.945143	2.21282e-16	2.24357e-16
Vps25	301973	1.383	100	100	1.291	0.783	0.99	0.467801	6.64386	6.64386	0.368489	-0.352916	-0.0144996	0.455128	3.30088e-16	2.92648e-16	0.919106	0.918935	0.97848
Acsl5	651124	0.758	1.235	0.942	0.01	0.782	0.01	-0.39973	0.304511	-0.086201	-6.64386	-0.354759	-6.64386	0.569592	0.87003	0.947127	2.67297e-16	0.890109	2.24357e-16
Anxa7	1.80795e+06	1.054	0.891	0.891	100	0.01	1.291	0.0758749	-0.166503	-0.166503	6.64386	-6.64386	0.368489	0.961465	0.87492	0.840755	2.67297e-16	2.21282e-16	0.652392
Aoc3	308792	1.381	0.897	1.269	0.652	0.937	0.602	0.465713	-0.15682	0.343692	-0.617056	-0.093879	-0.732165	0.479383	0.901835	0.843871	0.304954	0.993381	0.0544106
Chd3	103976	1.019	1.048	1.31	1.083	1.041	1.183	0.0271541	0.0676387	0.389567	0.115033	0.0579701	0.24245	0.985762	0.992438	0.877627	0.994798	0.95324	0.934369
Lipe	273793	1.071	1.12	1.145	1.229	0.911	1.138	0.0989585	0.163499	0.195348	0.297485	-0.134477	0.186501	0.970221	0.964159	0.968695	0.952887	0.999577	0.945305
Rabggtb	2.33541e+06	0.956	0.545	0.476	1.398	1.147	1.505	-0.0649175	-0.875672	-1.07097	0.483364	0.197865	0.589763	0.961212	0.000263046	3.23987e-06	0.547022	0.774642	0.0605071
Pnpla8	532445	1.13	1.106	1.343	0.825	1.34	1.123	0.176323	0.145351	0.425459	-0.277534	0.422233	0.167358	0.892151	0.9619	0.699984	0.762068	0.563428	0.949219
Arhgef25	700670	1.158	1.577	1.859	1.332	0.834	1.179	0.211635	0.657183	0.894527	0.413594	-0.261881	0.237564	0.859876	0.305673	0.0905738	0.868391	0.947773	0.901509
Ndc1	228693	0.454	2.586	1.209	1.034	1.87	2.017	-1.13924	1.37072	0.273814	0.0482362	0.903038	1.01221	0.0093147	0.00725899	0.933901	0.984321	0.157776	0.0721133
HC	2.94886e+06	0.68	1.765	1.425	0.01	0.764	0.01	-0.556393	0.819668	0.510962	-6.64386	-0.388355	-6.64386	0.0733437	0.0128984	0.258403	2.67297e-16	0.409825	2.24357e-16
Cacnb1	1.95828e+06	1.479	0.668	0.96	1.016	0.987	0.996	0.564622	-0.58208	-0.0588937	0.0229004	-0.018878	-0.00578235	0.0620074	0.101541	0.943445	0.987083	0.995117	0.983544
Cyp51a1	225431	0.414	3.305	1.301	0.717	0.515	0.775	-1.2723	1.72465	0.379621	-0.479955	-0.957356	-0.367732	0.00287137	0.000405263	0.886526	0.705067	0.294452	0.686852
Serpini1	622399	0.967	1.295	1.193	1.689	0.781	1.433	-0.0484122	0.372952	0.254594	0.756169	-0.356606	0.519039	0.978235	0.769808	0.915769	0.537571	0.900091	0.445148
Itpk1	207529	1.139	1.137	1.283	1.122	1.078	1.095	0.187768	0.185232	0.359521	0.166073	0.108357	0.130931	0.906915	0.959806	0.883269	0.995218	0.924845	0.982367
Lamp1	1.16476e+07	0.021	6.509	0.764	1.399	1.689	2.414	-5.57347	2.70244	-0.388355	0.484396	0.756169	1.27143	2.80253e-16	3.30088e-16	0.591048	0.00512379	2.58187e-05	2.24357e-16
Rps6ka6	384460	1.202	0.775	0.859	0.472	100	100	0.265437	-0.367732	-0.21927	-1.08314	6.64386	6.64386	0.798441	0.622625	0.851013	0.0315497	2.21282e-16	2.24357e-16
Mix23	49344.2	1.252	0.693	0.868	1.699	0.929	1.477	0.324235	-0.529073	-0.204233	0.764686	-0.106249	0.56267	0.780685	0.452659	0.915769	0.7276	0.999918	0.602265
Crtac1	392490	0.774	2.373	2.004	1.494	0.81	1.048	-0.369595	1.24671	1.00288	0.57918	-0.304006	0.0676387	0.625215	0.0108965	0.16159	0.776597	0.933686	0.992671
Scn1b	70137.9	0.705	1.5	0.301	1.408	0.527	0.758	-0.504305	0.584963	-1.73216	0.493647	-0.924125	-0.39973	0.608653	0.594351	0.000488358	0.88646	0.331717	0.646342
Cntnap5a	342189	0.748	1.494	1.001	0.784	1.403	1.009	-0.41889	0.57918	0.00144197	-0.351074	0.488515	0.0129262	0.540918	0.54868	0.977871	0.779458	0.576366	0.985307
Stxbp1	5.26266e+06	2.116	1.656	2.46	2.701	0.368	1.218	1.08134	0.727703	1.29866	1.43349	-1.44222	0.284514	5.95559e-12	0.00732083	1.03775e-10	1.29265e-06	2.40675e-09	0.52989
Slc25a29	273064	0.876	1.176	1.084	1.456	0.731	1.051	-0.190997	0.233888	0.116365	0.54201	-0.452057	0.0717627	0.887352	0.926367	0.986577	0.800257	0.81627	0.988918
Dhrs7	929924	1.159	1.169	0.993	1.204	0.536		0.212881	0.225275	-0.0101344	0.267835	-0.899695	#VALUE!	0.852863	0.865237	0.976973	0.940163	0.0334287
Pdxdc1	2.43048e+06	0.966	1.428	1.406	1.298	0.872	1.094	-0.0499049	0.513996	0.491597	0.37629	-0.1976	0.129613	0.970221	0.219897	0.345417	0.758015	0.908826	0.946024
Pelo	93157.9	1.007	0.914	0.794	1.071	0.949	1.001	0.0100637	-0.129734	-0.332789	0.0989585	-0.07552	0.00144197	0.990505	0.901835	0.83281	0.993536	0.992455	0.984783
Pitpnb	874022	1.087	0.84	0.921	0.805	1.186	0.969	0.120352	-0.251539	-0.118727	-0.312939	0.246104	-0.0454314	0.939912	0.721302	0.911906	0.628575	0.744862	0.95009
Ipo13	190976	0.896	0.589	0.481	1.568	100	100	-0.158429	-0.76366	-1.05589	0.648926	6.64386	6.64386	0.936922	0.165676	0.141321	0.7276	2.21282e-16	2.24357e-16
Tmem68	76034.3	1.297	2.075	2.8	0.01	1.193	0.01	0.375178	1.05311	1.48543	-6.64386	0.254594	-6.64386	0.704054	0.135081	0.0233663	2.67297e-16	0.83936	2.24357e-16
Als2	269370	0.701	1.466	0.945	0.93	1.371	1.3	-0.512514	0.551885	-0.0816138	-0.104697	0.455229	0.378512	0.382145	0.578066	0.954561	0.919106	0.617866	0.801994
Pak6	204544	0.753	1.303	1.034	0.906	0.785	0.946	-0.409278	0.381837	0.0482362	-0.142417	-0.349235	-0.0800879	0.647854	0.848168	0.99674	0.907286	0.915749	0.95009
Xkr4	84575.9	0.863	1.002	0.717	0.875	1.091	0.914	-0.212568	0.00288251	-0.479955	-0.192645	0.125651	-0.129734	0.907838	0.969211	0.667895	0.869131	0.926203	0.921851
Slc44a2	631287	1.028	1.07	1.084	0.775	1.635	1.357	0.0398403	0.0976108	0.116365	-0.367732	0.709291	0.440421	0.985762	0.983954	0.974658	0.619989	0.186788	0.595962
Tor1aip1	2.50241e+06	0.698	1.209	0.864	1.157	1.348	1.521	-0.518701	0.273814	-0.210897	0.210389	0.43082	0.60502	0.11304	0.727484	0.771562	0.920509	0.346347	0.072869
Aip	2.87059e+06	0.942	0.84	0.832	1.977	0.55	1.123	-0.086201	-0.251539	-0.265345	0.983313	-0.862496	0.167358	0.939725	0.635147	0.623574	0.0179829	0.0193094	0.909082
Mars2	288032	1.406	0.765	1.08	1.099	0.889	1.117	0.491597	-0.386468	0.111031	0.136191	-0.169745	0.159629	0.463252	0.629144	0.979709	0.998978	0.976072	0.953045
Ptbp3	53954.2	0.837	1.221	0.92	1.133	100	100	-0.2567	0.288063	-0.120294	0.180148	6.64386	6.64386	0.892151	0.940341	0.95166	0.993885	2.21282e-16	2.24357e-16
Xpnpep3	624718	1.127	1.135	1.342	1.27	0.929	1.375	0.172488	0.182692	0.424385	0.344828	-0.106249	0.459432	0.89008	0.902559	0.575269	0.887074	0.999918	0.531153
Ado	1.69447e+06	1.177	0.769	0.977	1.126	0.863	1.008	0.235114	-0.378944	-0.0335695	0.171207	-0.212568	0.0114956	0.77021	0.402155	0.956005	0.95712	0.904099	0.986592
Rtn4ip1	1.05463e+06	1.259	0.864	0.923	0.935	1.179	1.058	0.332278	-0.210897	-0.115597	-0.0969617	0.237564	0.0813396	0.647854	0.832761	0.890607	0.91007	0.731524	0.986715
Nelfb	164285	1.517	0.896	0.994	1.141	0.934	1.121	0.601221	-0.158429	-0.00868224	0.190299	-0.0985055	0.164786	0.330087	0.901835	0.973644	0.991683	0.996955	0.944448
Fxr1	87519.6	0.828	1.26	1.114	100	0.01	0.782	-0.272297	0.333424	0.155749	6.64386	-6.64386	-0.354759	0.869091	0.901835	0.973644	2.67297e-16	2.21282e-16	0.681345
Sec61a2	297304	0.738	1.494	1.172	1.701	1.063	1.535	-0.438307	0.57918	0.228973	0.766383	0.0881416	0.618239	0.504801	0.570822	0.955295	0.676854	0.944926	0.51296
Gpc6	869316	1.106	0.791	0.795	1.858	0.519	0.97	0.145351	-0.33825	-0.330973	0.893751	-0.946194	-0.0439433	0.911411	0.557825	0.598995	0.0289476	0.00727754	0.955587
Abca7	1.37851e+06	0.563	1.635	1.359	1.285	0.819	1.059	-0.828793	0.709291	0.442545	0.361768	-0.288065	0.0827026	0.0257439	0.0708525	0.634268	0.827225	0.828364	0.986715
Cbs	2.75358e+06	1.192	0.915	1.115	0.866	1.004	0.875	0.253384	-0.128156	0.157044	-0.207561	0.00575927	-0.192645	0.587692	0.892174	0.877766	0.736162	0.976709	0.621889
Ube2l3	511034	1.229	1.124	1.451	0.926	0.896	1.176	0.297485	0.168642	0.537048	-0.110916	-0.158429	0.233888	0.766142	0.927868	0.38964	0.887656	0.978138	0.901509
Eif3e	189294	1.359	0.881	1.149	0.663	1.411	0.92	0.442545	-0.182786	0.200379	-0.592919	0.496718	-0.120294	0.598195	0.89745	0.959937	0.542905	0.565513	0.9223
Ndufa5	186889	1.341	1.235	1.626	1.013	100	100	0.423309	0.304511	0.701327	0.0186342	6.64386	6.64386	0.638638	0.901835	0.516904	0.966324	2.21282e-16	2.24357e-16
Krt18	12636.6	0.01	0.924	0.01	0.477	1.702	0.745	-6.64386	-0.114035	-6.64386	-1.06794	0.767231	-0.424688	2.80253e-16	0.907622	2.92648e-16	0.149037	0.278069	0.60304
Ryr3	209378	0.01	1.498	0.01	0.779	1.173	0.914	-6.64386	0.583038	-6.64386	-0.360305	0.230203	-0.129734	2.80253e-16	0.593826	2.92648e-16	0.761728	0.85358	0.920355
Lman2	1.31177e+06	0.01	1.102	0.01	1.193	0.862	1.036	-6.64386	0.140124	-6.64386	0.254594	-0.21424	0.051024	2.80253e-16	0.929408	2.92648e-16	0.866538	0.855118	0.996171
Spryd4	642062	0.01	0.598	0.01	1.231	1.352	1.327	-6.64386	-0.741783	-6.64386	0.299831	0.435095	0.408168	2.80253e-16	0.0271144	2.92648e-16	0.855466	0.402289	0.594195
Abca2	2.58954e+06	0.01	0.674	0.01	1.038	100	100	-6.64386	-0.56918	-6.64386	0.0538064	6.64386	6.64386	2.80253e-16	0.0479281	2.92648e-16	0.994798	2.21282e-16	2.24357e-16
Washc4	313747	0.01	100		0.734	0.859	0.765	-6.64386	6.64386	#VALUE!	-0.446148	-0.21927	-0.386468	2.80253e-16	3.30088e-16		0.712976	0.96434	0.653915
Tagln	2.67341e+06	0.745	1.547	1.271	2.399	100	100	-0.424688	0.629473	0.345964	1.26243	6.64386	6.64386	0.26005	0.103249	0.650505	0.00030537	2.21282e-16	2.24357e-16
Vps33a	172717	1.352	0.783	0.902	0.991	1.696	1.681	0.435095	-0.352916	-0.148801	-0.013043	0.762136	0.74932	0.624792	0.712802	0.927226	0.952431	0.257164	0.295276
Decr2	752891		0.967		0.893	0.934	0.838	#VALUE!	-0.0484122	#VALUE!	-0.163268	-0.0985055	-0.254978		0.969211		0.844651	0.997261	0.738013
Wdr11	123709	1.398	1.198	1.485	0.01	0.634	0.01	0.483364	0.260628	0.570463	-6.64386	-0.657445	-6.64386	0.543147	0.94761	0.671876	2.67297e-16	0.61626	2.24357e-16
2410002F23Rik	622563	0.515	0.737	0.38	0.01	100		-0.957356	-0.440263	-1.39593	-6.64386	6.64386	#VALUE!	0.012753	0.455047	7.35422e-05	2.67297e-16	2.21282e-16
Cnnm3	62131.8	1.269	0.964	1.121	0.01	0.976	0.01	0.343692	-0.0528949	0.164786	-6.64386	-0.0350469	-6.64386	0.754465	0.943315	0.973644	2.67297e-16	0.973626	2.24357e-16
Hp	2.28606e+06	0.72	0.848	0.584	1.093	1.06	1.162	-0.473931	-0.237864	-0.77596	0.128293	0.0840643	0.21661	0.214437	0.738997	0.00518246	0.980358	0.930405	0.850219
Tgm2	1.90925e+06	0.804	1.012	0.804	1.41	1.091	1.29	-0.314733	0.0172093	-0.314733	0.495695	0.125651	0.367371	0.595304	0.999791	0.548948	0.572179	0.886966	0.532756
	5.28692e+06	1.162	100	100	0.228	2.114	0.629	0.21661	6.64386	6.64386	-2.13289	1.07998	-0.668868	0.612293	3.30088e-16	2.92648e-16	2.67297e-16	1.04471e-10	0.000407832
Abhd17b	559191	0.466	1.429	0.81	1.27	1.653	2.079	-1.1016	0.515006	-0.304006	0.344828	0.725087	1.05589	0.0016173	0.570822	0.798447	0.928936	0.242487	0.0182743
Farsa	478421	1.338	0.847	1.288	1.312	4.477	4.85	0.420078	-0.239566	0.365133	0.391768	2.16253	2.27798	0.567729	0.817327	0.788938	0.866538	4.2123e-08	5.99177e-13
Gng3	1.93779e+06	1.358	0.828	1.052		0.01	0.01	0.441483	-0.272297	0.0731347	#VALUE!	-6.64386	-6.64386	0.222172	0.653672	0.973644		2.21282e-16	2.24357e-16
Hmgn5	113423	0.462	0.862	0.374	0.852	1.147	1	-1.11404	-0.21424	-1.41889	-0.231075	0.197865	0	0.0207941	0.859778	0.0100562	0.827225	0.830043	0.985307
Ptpre	8.10449e+06	0.986	1.302	1.283	1.307	0.932	1.171	-0.0203404	0.380729	0.359521	0.386259	-0.101598	0.227741	0.991684	0.159496	0.363666	0.537571	0.944926	0.708922
Arih1	3.80313e+06	0.71	0.715	0.537	1.1	0.984	0.979	-0.494109	-0.483985	-0.897006	0.137504	-0.0232698	-0.0306192	0.13528	0.126008	0.000729793	0.974593	0.996944	0.960533
Gsdme	1.74812e+06	0.857	1.127	0.981	0.01	100		-0.222633	0.172488	-0.027675	-6.64386	6.64386	#VALUE!	0.782559	0.901835	0.970806	2.67297e-16	2.21282e-16
Pak5	1.07482e+06	0.996	1.772	1.619	1.566	0.863	1.303	-0.00578235	0.825379	0.695103	0.647084	-0.212568	0.381837	0.998876	0.0236022	0.178218	0.546482	0.96527	0.717658
Serpinc1	1.16042e+06	2.179	0.687	1.341	0.719	1.453	1.386	1.12367	-0.541618	0.423309	-0.475936	0.539035	0.470927	3.2128e-05	0.121761	0.383755	0.236157	0.108698	0.208866
Micos10	1.03844e+06	0.94	0.975	0.881	100		100	-0.0892673	-0.0365259	-0.182786	6.64386	#VALUE!	6.64386	0.949731	0.969211	0.851013	2.67297e-16		2.24357e-16
Sh3pxd2a	86817.8	0.586	1.804	1.212	1.015	0.874	0.661	-0.771027	0.851199	0.27739	0.0214797	-0.194295	-0.597278	0.21196	0.291306	0.933901	0.974391	0.973626	0.339674
Hk2	3.19211e+06	0.855	0.547	0.494	1.34	0.853	0.99	-0.226004	-0.870387	-1.01742	0.422233	-0.229382	-0.0144996	0.730777	0.000159228	1.20453e-05	0.569428	0.742972	0.97844
Stambp	1.26032e+06	0.749	1.05	0.804	1.54	0.969	1.463	-0.416962	0.0703893	-0.314733	0.62293	-0.0454314	0.54893	0.514152	0.979243	0.645004	0.457589	0.991332	0.347704
Slc43a2	1.27498e+06	0.542	0.935	0.61	0.907	1.494	1.396	-0.883635	-0.0969617	-0.713119	-0.140826	0.57918	0.481299	0.0175064	0.93468	0.0531886	0.838019	0.237413	0.515988
Csnk2b	3.25899e+06	0.881	1.253	1.069	0.01	0.874	0.01	-0.182786	0.325386	0.0962619	-6.64386	-0.194295	-6.64386	0.808659	0.611299	0.963321	2.67297e-16	0.920718	2.24357e-16
Pde4a	1.7097e+06	0.909	0.914	0.964	1.186	0.742	0.876	-0.137648	-0.129734	-0.0528949	0.246104	-0.430509	-0.190997	0.898994	0.896839	0.953979	0.919329	0.595331	0.759984
Atg101	218539	0.929	1.812	1.546	0.933	1.06	0.824	-0.106249	0.857583	0.62854	-0.100051	0.0840643	-0.279284	0.944519	0.211075	0.634268	0.926872	0.944926	0.803551
Coq10a	651949	0.964	0.888	0.899	1.598	0.529	0.74	-0.0528949	-0.171368	-0.153607	0.676267	-0.91866	-0.434403	0.975832	0.888085	0.888665	0.594857	0.152607	0.402811
Cnot11	76292.4	1.062	1.104	1.438	1.155	0.641	0.589	0.0867838	0.14274	0.524064	0.207893	-0.641604	-0.76366	0.955985	0.988961	0.772622	0.989425	0.648314	0.14384
Nop58	632834	1.118	1.179	1.336	1	0.801	0.783	0.16092	0.237564	0.41792	0	-0.320126	-0.352916	0.900448	0.902559	0.715985	0.957622	0.90695	0.566961
Mipep	1.99412e+06		0.998	1.17	2.473	0.601	1.486	#VALUE!	-0.00288828	0.226509	1.30626	-0.734563	0.571434		0.989292	0.883269	0.000104211	0.204492	0.163733
Psmg1	246744	1.956	1.001	1.145	0.924	1.311	1.067	0.967906	0.00144197	0.195348	-0.114035	0.390668	0.0935602	0.0127691	0.985698	0.946262	0.869521	0.609109	0.986929
Lars2	209624	2.33	0.772	2.621	1.159	1.008	1.185	1.22033	-0.373327	1.39012	0.212881	0.0114956	0.244887	0.0012821	0.665295	0.00754594	0.986587	0.964536	0.901509
Rragb	2.23157e+06	2.288	0.9	2.211	0.813	1.051	1.156	1.19409	-0.152003	1.1447	-0.298673	0.0717627	0.209141	4.52235e-09	0.895056	1.52211e-06	0.546003	0.947773	0.837299
Elfn2	449761	0.73	2.618	1.979	1.06	0.983	1.015	-0.454032	1.38847	0.984772	0.0840643	-0.0247367	0.0214797	0.477064	0.00116531	0.143372	0.989425	0.973626	0.987051
Map7	131838	2.032	0.509	0.886	1.101	0.872	0.918	1.0229	-0.974262	-0.174621	0.138814	-0.1976	-0.123434	0.0182885	0.0350254	0.888102	0.994798	0.973626	0.925362
Anxa1	685773	0.783	100	100	1.659	0.461	0.773	-0.352916	6.64386	6.64386	0.730314	-1.11716	-0.37146	0.659712	3.30088e-16	2.92648e-16	0.480828	0.039863	0.508668
Scai	3.33626e+06	1.538	0.618	1.028	0.627	1.32	0.81	0.621056	-0.694321	0.0398403	-0.673463	0.400538	-0.304006	0.0080943	0.00659289	0.977716	0.0130349	0.160644	0.320725
Skic2	186011	0.943	0.803	0.905	1.63	1.17	1.836	-0.0846703	-0.316528	-0.14401	0.704872	0.226509	0.876566	0.961212	0.757774	0.933901	0.7276	0.857643	0.135248
Lzts3	264992	1.035	1.01	1.065	0.642	1.244	0.792	0.0496308	0.0143553	0.0908534	-0.639355	0.314986	-0.336428	0.98609	0.988767	0.997176	0.452439	0.775276	0.708922
Lmbrd1	2.24312e+06	1.067	0.847	0.933	1.02	1.316	1.343	0.0935602	-0.239566	-0.100051	0.0285692	0.396159	0.425459	0.930729	0.738973	0.911888	0.989425	0.372593	0.350832
Osbpl9	789255	1.21	1.056	1.212	0.97	1.14	1.218	0.275007	0.0786098	0.27739	-0.0439433	0.189034	0.284514	0.798441	0.989292	0.878768	0.93052	0.849457	0.850356
Coq8a	646928	1.297	0.909	1.179	1.131	1.031	1.217	0.375178	-0.137648	0.237564	0.177599	0.0440443	0.283329	0.638638	0.902559	0.892253	0.965393	0.945685	0.843672
Klc2	4.38219e+06	0.865	1.256	1.129		0.01	0.01	-0.209228	0.328836	0.175045	#VALUE!	-6.64386	-6.64386	0.723945	0.527536	0.862507		2.21282e-16	2.24357e-16
Klhl22	3.23744e+06	0.575	1.004	0.477	1.005	1.086	0.952	-0.798366	0.00575927	-1.06794	0.0071955	0.119024	-0.0709665	0.0047405	0.996329	0.000527366	0.974391	0.89564	0.931364
Cap2	66043.5	11.407	0.056	0.49	26.059	0.03	0.77	3.51185	-4.15843	-1.02915	4.70371	-5.05889	-0.37707	2.80253e-16	3.30088e-16	0.00523285	2.67297e-16	2.21282e-16	0.478053
Os9	147547	0.745	1.582	1.134	0.841	1.455	1.112	-0.424688	0.66175	0.181421	-0.249822	0.541019	0.153157	0.677401	0.532483	0.968695	0.855466	0.518024	0.978208
Nhp2	331140	0.787	0.992	0.809	1.264	1.055	1.329	-0.345564	-0.011588	-0.305788	0.337996	0.077243	0.410341	0.711399	0.982994	0.759714	0.947787	0.946576	0.806898
Cald1	80394.8	0.818	0.968	0.779	0.844	1.066	0.936	-0.289827	-0.046921	-0.360305	-0.244685	0.0922074	-0.0954196	0.855108	0.952657	0.813463	0.855485	0.944701	0.935935
Selenot	979796	2.563	0.448	1.13	1.804	0.976	1.709	1.35783	-1.15843	0.176323	0.851199	-0.0350469	0.773152	4.17641e-07	0.000101675	0.919099	0.0550732	0.987609	0.0332945
Sacs	507028	1.16	0.906	1.043	1.08	0.811	1.016	0.214125	-0.142417	0.0607392	0.111031	-0.302226	0.0229004	0.855108	0.917913	0.996138	0.993885	0.931601	0.986715
Acot1	760372	1.216	0.984	1.089	1.058	1.002	1.496	0.282143	-0.0232698	0.123004	0.0813396	0.00288251	0.58111	0.748429	0.977198	0.959937	0.994453	0.973626	0.180494
Hectd4	393337	1.621	0.922	1.948	0.766	1.253	0.934	0.696884	-0.117161	0.961994	-0.384584	0.325386	-0.0985055	0.11304	0.927226	0.103388	0.733946	0.708132	0.931364
Ankh	389388	0.704	3.021	2.138	1.048	0.909	0.974	-0.506353	1.59503	1.09626	0.0676387	-0.137648	-0.0380063	0.40896	0.000189472	0.127621	0.986587	0.989707	0.960848
Smim26	1.02804e+06	0.446	0.318	0.086	0.703	1.252	0.799	-1.16488	-1.6529	-3.53952	-0.508403	0.324235	-0.323733	0.00056579	3.20457e-09	2.92648e-16	0.323759	0.609109	0.578048
Ech1	1.71289e+06	1.153	1.232	1.479	1.214	0.613	0.641	0.205393	0.301002	0.564622	0.279768	-0.706041	-0.641604	0.836261	0.72127	0.273647	0.888655	0.096246	0.0248777
Elmod1	2.02256e+06	1.087	0.976	1.109	1.021	0.78	0.819	0.120352	-0.0350469	0.149259	0.0299829	-0.358454	-0.288065	0.895937	0.972195	0.936143	0.989454	0.665233	0.532756
H1f3	6.48612e+06	0.819	1.279	1.016	1.306	1.119	1.476	-0.288065	0.355016	0.0229004	0.385155	0.16221	0.561693	0.427908	0.268944	0.992578	0.238609	0.707386	0.00164361
Mtfp1	404015	1.264	0.746	1.056	1.145	0.947	0.996	0.337996	-0.422752	0.0786098	0.195348	-0.0785637	-0.00578235	0.542364	0.341969	0.970806	0.928936	0.9889	0.978208
TIAM2	2.99092e+07	0.401	1.035	0.41	0.901	0.463	0.283	-1.31833	0.0496308	-1.2863	-0.150401	-1.11092	-1.82113	2.80253e-16	0.952657	2.92648e-16	0.33625	2.21282e-16	2.24357e-16
Pter	167500	0.849	1.12	0.923	1.823	0.64	1.052	-0.236164	0.163499	-0.115597	0.866315	-0.643856	0.0731347	0.866627	0.974827	0.947066	0.54579	0.634852	0.999853
Pank4	52799.1	0.914	0.678	0.642	1.408	0.463	0.767	-0.129734	-0.560643	-0.639355	0.493647	-1.11092	-0.382702	0.961212	0.402155	0.555928	0.869309	0.152672	0.686852
C1qc	4.82661e+06	0.922	1.001	0.975	1.071	0.928	1.065	-0.117161	0.00144197	-0.0365259	0.0989585	-0.107803	0.0908534	0.894717	0.989292	0.973644	0.974593	0.946305	0.931364
Gigyf2	434960	0.94	1.055	0.984	1.02	0.748	1.21	-0.0892673	0.077243	-0.0232698	0.0285692	-0.41889	0.275007	0.942769	0.989292	0.968695	0.963385	0.831851	0.865815
Srd5a3	770128	1.071	0.942	1.039	1.653	0.797	1.064	0.0989585	-0.086201	0.0551957	0.725087	-0.327348	0.0894982	0.961212	0.949139	0.996138	0.49553	0.920738	0.986715
Rhot2	244501	1.149	1.115	1.288	0.844	0.973	0.818	0.200379	0.157044	0.365133	-0.244685	-0.0394883	-0.289827	0.902885	0.966572	0.883269	0.827225	0.973626	0.761748
Nhlrc2	250221	1.186	0.757	0.868	1.147	0.973	1.246	0.246104	-0.401635	-0.204233	0.197865	-0.0394883	0.317304	0.864095	0.609307	0.870082	0.987083	0.973626	0.815393
Plcd1	1.06123e+06	1.221	1.009	1.237	1.08	0.863	0.982	0.288063	0.0129262	0.306846	0.111031	-0.212568	-0.0262051	0.68417	0.996329	0.739278	0.993885	0.918191	0.960739
Gcdh	1.67884e+06	0.874	1.051	1.074	0.416		2.033	-0.194295	0.0717627	0.102994	-1.26534	#VALUE!	1.02361	0.81897	0.973237	0.970806	4.39277e-05		7.95809e-05
Pnck	276262	1.323	0.675	0.838	0.906	1.184	0.911	0.403813	-0.567041	-0.254978	-0.142417	0.243669	-0.134477	0.599269	0.292832	0.820468	0.896267	0.812814	0.909449
Nbas	125230	1.407	1.568	1.143	1.881	0.799	1.212	0.492622	0.648926	0.192825	0.9115	-0.323733	0.27739	0.535552	0.492929	0.968695	0.503249	0.924845	0.908938
Dop1a	56584.4	1.453	0.925	1.289	0.722	1.382	1.075	0.539035	-0.112475	0.366252	-0.469929	0.466758	0.104337	0.464986	0.917913	0.88157	0.687736	0.625086	0.986715
Cisd3	194200	1.528	0.868	1.405	1.456	0.875	1.243	0.611645	-0.204233	0.49057	0.54201	-0.192645	0.313826	0.299422	0.889986	0.753992	0.853384	0.973626	0.884371
Cpox	1.42425e+06	0.01	1.291	0.01	0.844	0.907	0.791	-6.64386	0.368489	-6.64386	-0.244685	-0.140826	-0.33825	2.80253e-16	0.596832	2.92648e-16	0.7276	0.958874	0.501166
Abi3	4.15841e+06	0.01	1.11	0.01	0.956	0.844	0.82	-6.64386	0.15056	-6.64386	-0.0649175	-0.244685	-0.286304	2.80253e-16	0.901835	2.92648e-16	0.924159	0.708132	0.350832
Saal1	124828	0.01	1.013	0.01	1.435	0.794	1.229	-6.64386	0.0186342	-6.64386	0.521051	-0.332789	0.297485	2.80253e-16	0.97565	2.92648e-16	0.865136	0.929611	0.901509
Atp2b2	7.19744e+06	0.01	2.353	0.01	0.462	100	100	-6.64386	1.2345	-6.64386	-1.11404	6.64386	6.64386	2.80253e-16	1.63303e-09	2.92648e-16	3.41512e-05	2.21282e-16	2.24357e-16
	1.10205e+06	0.01	17.851	0.01	100	0.01	0.76	-6.64386	4.15793	-6.64386	6.64386	-6.64386	-0.395929	2.80253e-16	3.30088e-16	2.92648e-16	2.67297e-16	2.21282e-16	0.577233
Clip3	3.11769e+06	1.153	0.721	0.807	0.715	1.274	0.847	0.205393	-0.471929	-0.309359	-0.483985	0.349365	-0.239566	0.704054	0.128992	0.519385	0.118809	0.262173	0.532756
Celf2	1.26478e+06	0.737	100	100	100	0.01	0.99	-0.440263	6.64386	6.64386	6.64386	-6.64386	-0.0144996	0.463252	3.30088e-16	2.92648e-16	2.67297e-16	2.21282e-16	0.971916
Pakap	709015	1.207	1.18	1.196	1.374	0.829	0.516	0.271426	0.238787	0.258217	0.458382	-0.270556	-0.954557	0.799037	0.89821	0.884913	0.795771	0.890109	0.005094
Dock9	655657	1.497	0.894	1.46	2.249	0.689	1.097	0.582074	-0.161653	0.545968	1.16928	-0.537424	0.133564	0.250493	0.901835	0.444426	0.0256566	0.509016	0.968758
Papss2	253260	0.904	0.647	0.64	0.983	1.025	1.068	-0.145605	-0.628162	-0.643856	-0.0247367	0.0356239	0.0949116	0.917146	0.26611	0.349171	0.945865	0.94865	0.985307
Eefsec	470965	1.185	0.742	1.047	0.991	0.918	0.881	0.244887	-0.430509	0.0662614	-0.013043	-0.123434	-0.182786	0.81897	0.463037	0.992578	0.944049	0.993381	0.864002
Cp	405378	5.731	0.515	0.849	1.195	0.87	1.06	2.51879	-0.957356	-0.236164	0.257011	-0.200913	0.0840643	2.80253e-16	0.00995711	0.778222	0.960526	0.972921	0.986715
Trappc1	3.44459e+07	1.111	0.995	1.07	2.137	0.665	0.981	0.151859	-0.00723157	0.0976108	1.09559	-0.588574	-0.027675	0.439062	0.989292	0.892949	2.67297e-16	0.00215798	0.959122
Tmem177	1.30179e+06	1.08	1.128	0.927	1.304	1.314	1.415	0.111031	0.173767	-0.109359	0.382944	0.393965	0.500802	0.941297	0.901835	0.928343	0.82065	0.550319	0.42916
S100a6	109086	1.173	2.606	2.05	1.56	1.568	2.039	0.230203	1.38184	1.03562	0.641546	0.648926	1.02786	0.864095	0.0123825	0.259966	0.773303	0.414108	0.0625711
ALB	1.32741e+06	1.331	0.822	1.28	1.26	0.68	0.711	0.412511	-0.28279	0.356144	0.333424	-0.556393	-0.492079	0.544137	0.7061	0.66864	0.817667	0.23498	0.117234
Rock1	145081	0.834	0.868	0.748	0.086	9.697	0.833	-0.261881	-0.204233	-0.41889	-3.53952	3.27754	-0.263612	0.855108	0.892713	0.733259	2.67297e-16	2.21282e-16	0.801782
Sphkap	91539.2	0.793	0.954	0.734	0.774	1.17	0.941	-0.334607	-0.0679388	-0.446148	-0.369595	0.226509	-0.0877334	0.805447	0.939723	0.723684	0.770492	0.861046	0.943203
Mfap1b	453977	0.738	1.041	0.865	0.634	0.932	0.587	-0.438307	0.0579701	-0.209228	-0.657445	-0.101598	-0.768568	0.523017	0.998187	0.861551	0.374851	0.999918	0.0375748
Naprt	176466	0.876	1.911	1.397	1.101	1.143	1.171	-0.190997	0.934328	0.482332	0.138814	0.192825	0.227741	0.911286	0.209246	0.8291	0.994798	0.886966	0.943044
Srp68	935523	0.892	1.278	1.228				-0.164884	0.353888	0.296311	#VALUE!	#VALUE!	#VALUE!	0.885085	0.714816	0.851013
Arsb	262532	1.442	0.761	1.17	0.764	1.104	0.886	0.528071	-0.394032	0.226509	-0.388355	0.14274	-0.174621	0.464795	0.654961	0.959937	0.729395	0.889902	0.889892
Tomm40l	2.66373e+06	0.492	1.125	0.306	0.639	0.811	0.967	-1.02327	0.169925	-1.7084	-0.646112	-0.302226	-0.0484122	0.000730297	0.901341	1.87918e-13	0.108252	0.714309	0.95009
CAT	6.29902e+06	1.127	1.156	1.303	0.89	0.35	0.257	0.172488	0.209141	0.381837	-0.168123	-1.51457	-1.96016	0.696732	0.716991	0.298862	0.805469	2.21282e-16	2.24357e-16
Eif2b4	71737	0.659	1.693	1.031	1.015	0.906	0.888	-0.60165	0.759582	0.0440443	0.0214797	-0.142417	-0.171368	0.498771	0.446522	0.99674	0.969814	0.987609	0.901509
Ppox	1.99779e+06	0.689	1.115	0.785	1.101	0.993	1.219	-0.537424	0.157044	-0.349235	0.138814	-0.0101344	0.285698	0.168773	0.904525	0.487177	0.974391	0.975984	0.776989
Banf1	1.64375e+06	0.721	1.153	0.836	1.224	0.692	0.884	-0.471929	0.205393	-0.258425	0.291604	-0.531156	-0.177882	0.295988	0.88691	0.738976	0.855466	0.307193	0.80142
Cfap20dc	904786	0.749	1.214	0.914	0.905	1.138	1.074	-0.416962	0.279768	-0.129734	-0.14401	0.186501	0.102994	0.501619	0.816324	0.915769	0.861853	0.828391	0.985307
Tfam	5.08393e+06	0.825	0.997	0.889	100		100	-0.277534	-0.00433459	-0.169745	6.64386	#VALUE!	6.64386	0.568232	0.987121	0.843871	2.67297e-16		2.24357e-16
Arpc1b	1.43198e+06	0.868	0.79	0.726	1.311	0.914	1.104	-0.204233	-0.340075	-0.461959	0.390668	-0.129734	0.14274	0.81705	0.545742	0.273691	0.784461	0.973626	0.960694
Mindy4b-ps	1.62382e+06	1.009	1.1	1.076	0.85	0.764	0.667	0.0129262	0.137504	0.105678	-0.234465	-0.388355	-0.584241	0.99982	0.927868	0.973644	0.750431	0.493588	0.042034
Cc2d1a	833973	0.971	0.92	1.031	1.529	0.747	1.146	-0.0424568	-0.120294	0.0440443	0.612588	-0.42082	0.196607	0.974209	0.923039	0.99772	0.64788	0.839893	0.934369
Tuft1	1.29932e+07	1	1.091	1.191	0.653	1.076	0.768	0	0.125651	0.252173	-0.614845	0.105678	-0.380822	0.99982	0.854015	0.625064	0.00329791	0.796103	0.0625306
Usp31	824593	1.035	0.827	0.888	1.056	1.032	1.072	0.0496308	-0.274041	-0.171368	0.0786098	0.045443	0.100305	0.987674	0.675769	0.858484	0.989425	0.949206	0.986715
Glb1	813992	1.07	0.816	0.871	1.015	1.343	1.479	0.0976108	-0.293359	-0.199255	0.0214797	0.425459	0.564622	0.961212	0.701092	0.846623	0.960526	0.55323	0.368465
Pea15	579418	1.097	1.129	1.267	1.682	1.026	1.726	0.133564	0.175045	0.341417	0.750178	0.0370307	0.787432	0.926722	0.947468	0.823666	0.563651	0.952109	0.0843771
Wdr44	3.38001e+06	1.126	1.071	1.169	0.942	1.138	1.187	0.171207	0.0989585	0.225275	-0.086201	0.186501	0.24732	0.798441	0.9619	0.853391	0.919329	0.803543	0.788288
Cpd	768250	1.268	1.204	1.474	2.176	0.57	1.428	0.342555	0.267835	0.559737	1.12168	-0.810966	0.513996	0.683382	0.848998	0.382604	0.0653685	0.338057	0.478624
Letmd1	3.60507e+06	1.016	1.006	1.022	0.841	1.785	1.367	0.0229004	0.00863031	0.0313952	-0.249822	0.835924	0.451013	0.976252	0.989292	0.989372	0.746249	0.00471739	0.308605
Mrps30	231733	1.268	1.149	1.313	0.945	3.092	2.237	0.342555	0.200379	0.392867	-0.0816138	1.62854	1.16157	0.764788	0.952657	0.874061	0.923801	0.000818779	0.0220516
Fdxr	242933	1.038	1.376	1.372	100		100	0.0538064	0.46048	0.45628	6.64386	#VALUE!	6.64386	0.988864	0.723863	0.823666	2.67297e-16		2.24357e-16
Iqgap2	121345	0.664	1.386	0.837	1.006	0.876	1.065	-0.590745	0.470927	-0.2567	0.00863031	-0.190997	0.0908534	0.44666	0.753301	0.874362	0.980673	0.801904	0.949457
Tubb1	239409	1.676	0.447	0.738	0.66	1.343	0.869	0.745022	-1.16165	-0.438307	-0.599462	0.425459	-0.202572	0.129498	0.00510041	0.59618	0.414698	0.548295	0.862259
Cd99l2	5.13687e+06	0.869	1.214	1.067	1.382	1.099	1.413	-0.202572	0.279768	0.0935602	0.466758	0.136191	0.498761	0.7372	0.645128	0.94288	0.525149	0.86195	0.15392
Sharpin	145081	1.108	0.868	0.975	0.921	0.885	0.835	0.147958	-0.204233	-0.0365259	-0.118727	-0.176251	-0.260152	0.933081	0.892713	0.973644	0.907172	0.97529	0.809609
Mtmr7	4.47718e+06	1.164	1.124	1.357	1.114	1.004	1.107	0.219091	0.168642	0.440421	0.155749	0.00575927	0.146655	0.645439	0.896839	0.232885	0.963385	0.973626	0.929375
Ctif	381004	1.47	1.01	1.324	0.707	1.106	0.832	0.555816	0.0143553	0.404903	-0.500218	0.145351	-0.265345	0.27006	0.992172	0.712327	0.413921	0.882257	0.721059
Spata2l	310409	0.546	2.42	0.994	1.453	0.631	0.964	-0.873027	1.27501	-0.00868224	0.539035	-0.664288	-0.0528949	0.0556753	0.0102944	0.974313	0.854348	0.605752	0.956724
Stx17	130618	0.601	2.475	1.432	1.423	0.907	0.986	-0.734563	1.30743	0.518031	0.508936	-0.140826	-0.0203404	0.220257	0.0227132	0.782028	0.866538	0.989261	0.977734
Rasgrp1	863979	0.779	100	100	1.195	0.778	0.912	-0.360305	6.64386	6.64386	0.257011	-0.362158	-0.132894	0.618781	3.30088e-16	2.92648e-16	0.956131	0.886966	0.89328
Niban2	462000	1.153	100	100	0.661	1.514	1.044	0.205393	6.64386	6.64386	-0.597278	0.598365	0.0621217	0.869091	3.30088e-16	2.92648e-16	0.277192	0.313458	0.996366
Cxnp1	826855	1.601	0.915	1.591	0.01	0.927	0.01	0.678973	-0.128156	0.669934	-6.64386	-0.109359	-6.64386	0.10688	0.91022	0.177969	2.67297e-16	0.997978	2.24357e-16
Eif2b5	1.11338e+06	1.031	1.051	1.112	0.835	0.48	0.385	0.0440443	0.0717627	0.153157	-0.260152	-1.05889	-1.37707	0.985009	0.983954	0.955295	0.705067	0.00161197	1.75422e-08
Becn1	230598	0.724	1.171	0.732	0.906	0.519	0.451	-0.465938	0.227741	-0.450084	-0.142417	-0.946194	-1.1488	0.554912	0.932059	0.682151	0.896336	0.257455	0.00549405
Cdkn2aip	232487	0.784	0.978	0.777	0.949	1.136	1.119	-0.351074	-0.0320936	-0.364013	-0.07552	0.183963	0.16221	0.704054	0.969211	0.748772	0.923801	0.887725	0.970708
Rrbp1	125631	0.924	0.392	0.607	0.775	1.002	0.596	-0.114035	-1.35107	-0.720232	-0.367732	0.00288251	-0.746616	0.955985	0.00131954	0.268261	0.739524	0.960968	0.0461911
Psph	2.41001e+06	0.907	1.146	1.044	0.949	1.234	1.158	-0.140826	0.196607	0.0621217	-0.07552	0.303342	0.211635	0.885085	0.895657	0.989372	0.922509	0.588983	0.876834
Ppp2r2c	1.42444e+06	0.928	0.881	0.841	0.854	1.011	0.83	-0.107803	-0.182786	-0.249822	-0.227692	0.015783	-0.268817	0.924744	0.881979	0.736011	0.745557	0.964994	0.65092
Lrrc8a	482046	0.95	1.218	1.13	1.757	0.691	1.073	-0.0740006	0.284514	0.176323	0.813114	-0.533242	0.10165	0.953162	0.838813	0.923434	0.358203	0.622661	0.986592
Ptgr3	3.97606e+06	0.972	0.939	0.926	0.96	1.046	1.119	-0.0409718	-0.0908029	-0.110916	-0.0588937	0.0648829	0.16221	0.977439	0.915536	0.919099	0.933576	0.944926	0.916663
Sart1	1.20262e+07	0.805	1.78	1.329	0.887	0.825	0.753	-0.312939	0.831877	0.410341	-0.172994	-0.277534	-0.409278	0.109907	3.69814e-07	0.213072	0.692343	0.611587	0.0419237
Lrrtm1	1.76789e+06	0.983	0.971	0.963	1.152	0.78	0.96	-0.0247367	-0.0424568	-0.0543923	0.204141	-0.358454	-0.0588937	0.974209	0.971023	0.938494	0.929882	0.608473	0.941263
Rad23a	476464	0.99	1.176	1.438	1.074	1.004	1.077	-0.0144996	0.233888	0.524064	0.102994	0.00575927	0.107018	0.992929	0.904584	0.633491	0.994798	0.960968	0.984783
Sema7a	3.55442e+06	1.031	0.927	0.953	0.896	0.915	0.844	0.0440443	-0.109359	-0.0694519	-0.158429	-0.128156	-0.244685	0.961212	0.898166	0.95288	0.865951	0.944952	0.628521
Pdzd8	1.24073e+06	1.033	0.798	0.801	1.289	0.834	1.005	0.0468403	-0.325539	-0.320126	0.366252	-0.261881	0.0071955	0.979114	0.609178	0.634268	0.801667	0.889446	0.983544
Strada	861544	1.052	1.348	1.292	1.86	0.513	0.968	0.0731347	0.43082	0.369606	0.895303	-0.962969	-0.046921	0.972794	0.57558	0.759714	0.291457	0.145361	0.957028
Brox	218167	1.064	1.256	1.481	3.398	0.476	2.026	0.0894982	0.328836	0.566572	1.76469	-1.07097	1.01863	0.971613	0.894429	0.6981	0.0119379	0.188483	0.0650926
Gtf2i	952925	1.112	0.928	1.197	1.322	1.078	1.033	0.153157	-0.107803	0.259423	0.402722	0.108357	0.0468403	0.908424	0.915231	0.868871	0.852472	0.915555	0.999548
Mmab	1.89795e+06	1.171	0.905	1.108	1.224	1.047	1.441	0.227741	-0.14401	0.147958	0.291604	0.0662614	0.52707	0.768817	0.895657	0.936143	0.866538	0.944926	0.337509
Ncoa6	1.02464e+06	1.027	2.447	2.296	2.843	0.67	1.474	0.0384362	1.29101	1.19912	1.50741	-0.577767	0.559737	0.985762	0.000313096	0.00188283	0.00553154	0.645966	0.390016
Naga	137076	1.151	1.02	1.148	3.307	0.319	1.11	0.202888	0.0285692	0.199123	1.72552	-1.64837	0.15056	0.894717	0.986372	0.961997	0.00987628	0.00318311	0.967188
Kazn	1.3004e+06	0.791	1.132	1.042	1.26	0.788	0.751	-0.33825	0.178874	0.0593553	0.333424	-0.343732	-0.413115	0.670887	0.901835	0.99674	0.932017	0.927486	0.523352
Gltp	2.2122e+06	0.794	1.468	1.171	1.377	1.023	1.248	-0.332789	0.553852	0.227741	0.461529	0.0328061	0.319618	0.556075	0.149659	0.883269	0.79213	0.94946	0.815178
Ube4a	474388	0.847	1.701	1.361	1.791	0.817	1.216	-0.239566	0.766383	0.444667	0.840765	-0.291592	0.282143	0.81897	0.240977	0.828881	0.510499	0.944926	0.854132
Zbed5	4.59911e+06	1.2	0.654	0.838	0.846	1.242	1.086	0.263034	-0.612637	-0.254978	-0.24127	0.312665	0.119024	0.518885	0.004065	0.582363	0.62227	0.359654	0.92228
Stt3b	2.71741e+06	0.851	1.273	1.058	1.067	0.836	0.88	-0.232769	0.348232	0.0813396	0.0935602	-0.258425	-0.184425	0.717381	0.592579	0.980206	0.992364	0.729518	0.669775
Rab12	5.48591e+06	1.339	0.718	0.948	1.17	0.721	0.859	0.421156	-0.477944	-0.077041	0.226509	-0.471929	-0.21927	0.057031	0.0209461	0.919639	0.886505	0.373236	0.574374
Dnm1l	4.97009e+06	1.251	0.72	0.949	0.983	0.814	0.803	0.323082	-0.473931	-0.07552	-0.0247367	-0.296899	-0.316528	0.308446	0.0250681	0.933901	0.94807	0.517541	0.240731
Trappc5	397993	0.884	1.263	1.11	1.152	1.136	1.374	-0.177882	0.336855	0.15056	0.204141	0.183963	0.458382	0.89008	0.852109	0.973644	0.987083	0.855118	0.624104
Kif20b	6.5016e+06	28.798	0.366	13.312	1.794	0.554	0.841	4.8479	-1.45008	3.73466	0.84318	-0.852042	-0.249822	2.80253e-16	1.07037e-10	2.92648e-16	0.000842447	0.000117033	0.251146
Hpx	1.02228e+07	0.815	1.091	0.834	1.068	0.702	0.79	-0.295128	0.125651	-0.261881	0.0949116	-0.510457	-0.340075	0.336512	0.885331	0.634268	0.987083	0.0721649	0.136105
Gba2	696853	1.023	1.609	1.725	0.941	1.134	0.93	0.0328061	0.686164	0.786596	-0.0877334	0.181421	-0.104697	0.996421	0.272781	0.122332	0.897703	0.841253	0.921851
Rftn1	469111	1.081	1.209	1.148	1.125	0.917	0.985	0.112367	0.273814	0.199123	0.169925	-0.125006	-0.0218044	0.942769	0.804485	0.9041	0.960384	0.972921	0.964511
Mbnl1	5.0021e+06	1.275	1.078	1.31	0.606	1.622	1.102	0.350497	0.108357	0.389567	-0.72261	0.697774	0.140124	0.222172	0.934668	0.316013	0.0192673	0.011404	0.92228
Slc22a17	123635	1.194	0.894	1.131	1.414	0.641	0.946	0.255803	-0.161653	0.177599	0.499782	-0.641604	-0.0800879	0.855108	0.898166	0.973644	0.866538	0.649671	0.946024
Atp9a	2.97328e+06	1.233	0.924	1.149	1.19	0.996	1.29	0.302173	-0.114035	0.200379	0.250962	-0.00578235	0.367371	0.46794	0.89745	0.850525	0.87692	0.97529	0.476444
Ndufb1	2.04249e+06	1.022	1.547	1.709	2.432	100	100	0.0313952	0.629473	0.773152	1.28214	6.64386	6.64386	0.984143	0.0958132	0.0331675	0.00180903	2.21282e-16	2.24357e-16
Dnajc8	659422	1.259	0.781	1.186	1.372	0.659	0.904	0.332278	-0.356606	0.246104	0.45628	-0.60165	-0.145605	0.704054	0.583087	0.88281	0.846901	0.622994	0.885167
Sh2b1	54799.2	100	0.01	0.872	0.278	2.354	1.607	6.64386	-6.64386	-0.1976	-1.84684	1.23511	0.68437	2.80253e-16	3.30088e-16	0.63955	5.42019e-10	0.000102503	0.106579
Sephs1	895167	1.323	0.692	0.898	1.415	0.892	1.175	0.403813	-0.531156	-0.155213	0.500802	-0.164884	0.232661	0.561973	0.184136	0.877627	0.645215	0.952109	0.890011
Tmed4	101037	0.327	2.175	0.799	5.201	0.083	0.529	-1.61264	1.12102	-0.323733	2.37879	-3.59074	-0.91866	6.25213e-05	0.0748919	0.844794	0.000238172	8.13281e-14	0.0577848
Fmnl2	1.30799e+06	0.884	1.103	0.996	0.893	0.83	0.772	-0.177882	0.141433	-0.00578235	-0.163268	-0.268817	-0.373327	0.855108	0.926367	0.978608	0.827195	0.849457	0.355877
Dop1b	201635	1.074	0.939	0.942	1.054	1.055	0.991	0.102994	-0.0908029	-0.086201	0.0758749	0.077243	-0.013043	0.961212	0.941938	0.955295	0.987273	0.936376	0.97844
Jakmip3	112054	0.917	1.419	1.309	0.649	0.875	0.495	-0.125006	0.504875	0.388465	-0.62371	-0.192645	-1.0145	0.961212	0.757774	0.87948	0.511923	0.973626	0.0194428
D630045J12Rik	1.57864e+06	1.14	0.574	0.695	1.602	0.58	0.917	0.189034	-0.800877	-0.524915	0.679874	-0.785875	-0.125006	0.881868	0.00592085	0.152777	0.204994	0.0916438	0.885167
Faim2	4.01971e+06	0.953	1.132	1.103	0.883	0.859	0.803	-0.0694519	0.178874	0.141433	-0.179515	-0.21927	-0.316528	0.954317	0.892609	0.892055	0.833108	0.875621	0.473468
Mien1	2.93137e+06	1.538	1.234	1.908	1.509	100	100	0.621056	0.303342	0.932061	0.593593	6.64386	6.64386	0.0079966	0.661662	0.000196794	0.333379	2.21282e-16	2.24357e-16
Mta1	402809	0.779	1.007	0.774	1.011	1.014	0.947	-0.360305	0.0100637	-0.369595	0.015783	0.0200577	-0.0785637	0.647854	0.988767	0.671876	0.960526	0.958874	0.943203
Maged1	1.15029e+06	1.379	0.874	1.128	0.837	0.738	0.649	0.463622	-0.194295	0.173767	-0.2567	-0.438307	-0.62371	0.365082	0.852603	0.923434	0.699538	0.587378	0.0702999
Acsf3	926094	0.657	1.152	0.731	0.558	1.714	0.857	-0.606035	0.204141	-0.452057	-0.841663	0.777367	-0.222633	0.180856	0.898166	0.450133	0.0632763	0.0937811	0.793582
Trnt1	427501	0.851	100	100	0.997	100	100	-0.232769	6.64386	6.64386	-0.00433459	6.64386	6.64386	0.834741	3.30088e-16	2.92648e-16	0.951771	2.21282e-16	2.24357e-16
Ttbk1	177639	0.333	1.211	0.347	3.885	0.182	0.584	-1.58641	0.276199	-1.52699	1.95791	-2.45799	-0.77596	5.51656e-05	0.921831	0.00542755	0.00347311	7.35849e-07	0.114107
Herc4	516115	0.865	0.97	0.82	1.372	0.893	1.118	-0.209228	-0.0439433	-0.286304	0.45628	-0.163268	0.16092	0.855108	0.966245	0.778222	0.863369	0.980338	0.95009
Arhgef17	93971.5	0.92	0.803	0.748	1.239	0.823	1.018	-0.120294	-0.316528	-0.41889	0.309176	-0.281036	0.0257376	0.961212	0.746436	0.728479	0.942287	0.944926	0.986715
Tmcc1	924114	0.978	0.683	0.67	1.255	0.781	1.042	-0.0320936	-0.550043	-0.577767	0.327687	-0.356606	0.0593553	0.981951	0.154512	0.184051	0.866538	0.796103	0.999853
Mpi	1.44132e+06	1.015	1.052	0.958	1.557	1.885	2.62	0.0214797	0.0731347	-0.0619024	0.638769	0.914565	1.38957	0.998979	0.975007	0.955295	0.348079	0.0207287	8.06681e-06
Nsg2	150173	1.02	1.031	1	1.107	1.026	1.289	0.0285692	0.0440443	0	0.146655	0.0370307	0.366252	0.99271	0.994722	0.980585	0.995599	0.960082	0.853156
Krt8	994082	1.035	0.993	0.978	1.006	0.932	0.933	0.0496308	-0.0101344	-0.0320936	0.00863031	-0.101598	-0.100051	0.984921	0.985424	0.963365	0.979906	0.973626	0.901509
Apbb1	1.04244e+06	1.204	1	1.155	1.211	0.914	1.193	0.267835	0	0.207893	0.276199	-0.129734	0.254594	0.77021	0.989284	0.892055	0.896907	0.970428	0.876584
Adissp	7.28328e+06	1.226	0.909	1.036	100	0.01	0.492	0.293959	-0.137648	0.051024	6.64386	-6.64386	-1.02327	0.233946	0.772416	0.978248	2.67297e-16	2.21282e-16	1.27246e-06
Cdc42bpa	984346	1.057	2.025	1.846	0.484	2.147	1.704	0.0799754	1.01792	0.884403	-1.04692	1.10232	0.768925	0.961465	0.00813754	0.0509017	0.0014364	0.00111504	0.104983
Nemf	1.80625e+06	0.758	3.208	2.641	1.173	0.922	1.258	-0.39973	1.68167	1.40108	0.230203	-0.117161	0.331132	0.415395	1.71326e-09	1.71034e-05	0.951614	0.973626	0.784493
Nudc	218708	0.733	0.865	0.647	0.785	1.681	1.413	-0.448115	-0.209228	-0.628162	-0.349235	0.74932	0.498761	0.564994	0.884424	0.406104	0.762212	0.258871	0.628521
Iscu	5.24445e+06	0.742	1.129	0.821	0.825	100	100	-0.430509	0.175045	-0.284546	-0.277534	6.64386	6.64386	0.164278	0.863085	0.593558	0.671917	2.21282e-16	2.24357e-16
Slc12a9	279048	0.801	1.068	0.854	1.026	1.049	1.019	-0.320126	0.0949116	-0.227692	0.0370307	0.0690147	0.0271541	0.711925	0.989292	0.868871	0.977036	0.943228	0.986911
Pakap	1.77329e+06	0.922	0.691	0.662	0.812	1.425	1.161	-0.117161	-0.533242	-0.595097	-0.300448	0.510962	0.215368	0.908738	0.140093	0.0710815	0.660254	0.156803	0.853156
Cdh11	2.04788e+06	0.852	1.158	0.923	0.949	0.956	0.9	-0.231075	0.211635	-0.115597	-0.07552	-0.0649175	-0.152003	0.732913	0.868287	0.88281	0.922509	0.995117	0.840078
Ermp1	3.14092e+06	0.887	1.16	1.052	0.767	0.991	0.801	-0.172994	0.214125	0.0731347	-0.382702	-0.013043	-0.320126	0.837078	0.856822	0.979361	0.51256	0.991332	0.409988
Abcf2	1.77991e+06	0.943	0.936	0.892	1.103	0.949	1.015	-0.0846703	-0.0954196	-0.164884	0.141433	-0.07552	0.0214797	0.935822	0.925063	0.832362	0.974593	0.988223	0.986715
Tspyl4	106812	0.952	0.691	0.684	0.961	1.141	1.05	-0.0709665	-0.533242	-0.547932	-0.0573917	0.190299	0.0703893	0.973211	0.4404	0.546138	0.930637	0.885039	0.999853
Iba57	3.38124e+06	1.784	1.091	2.01	1.249	0.648	0.856	0.835116	0.125651	1.0072	0.320773	-0.625934	-0.224317	2.96095e-05	0.946615	1.60538e-05	0.820363	0.0502312	0.570448
Itsn2	140781	0.99	0.962	1.142	0.854	1.507	1.195	-0.0144996	-0.0558912	0.191563	-0.227692	0.591679	0.257011	0.995192	0.943361	0.966763	0.857908	0.444525	0.926389
Tsc22d2	751316	0.99	0.801	1.431	1.933	0.582	1.167	-0.0144996	-0.320126	0.517024	0.950842	-0.780909	0.222805	0.994154	0.593826	0.39508	0.153491	0.178607	0.901509
Sorcs2	323557	1.018	0.861	0.832	0.985	1.088	1.005	0.0257376	-0.215915	-0.265345	-0.0218044	0.121679	0.0071955	0.99982	0.794537	0.732313	0.942193	0.910502	0.983712
Ndufaf3	872146	1.031	1.175	1.205	1.195	0.971	1.053	0.0440443	0.232661	0.269033	0.257011	-0.0424568	0.0745054	0.98609	0.874333	0.852403	0.941292	0.989261	0.992836
	4.9142e+06	0.906	0.973	0.861	100	0.01	1.893	-0.142417	-0.0394883	-0.215915	6.64386	-6.64386	0.920674	0.857278	0.958655	0.744045	2.67297e-16	2.21282e-16	0.00065781
Apeh	2.62222e+06	1.209	0.94	1.207	1.1	1.148	1.268	0.273814	-0.0892673	0.271426	0.137504	0.199123	0.342555	0.543113	0.92122	0.683913	0.974391	0.747729	0.508668
Pklr	500929	0.688	1.173	0.71	1.154	1.794	1.422	-0.53952	0.230203	-0.494109	0.206643	0.84318	0.507921	0.303288	0.848168	0.206934	0.932017	0.0133087	0.310515
Sf3a1	626022	1.223	0.835	0.962	1.031	1.113	1.249	0.290424	-0.260152	-0.0558912	0.0440443	0.154454	0.320773	0.726022	0.793387	0.956592	0.987083	0.880846	0.780499
Dnah8	407191	1.332	0.897	1.233	1.501	0.719	1.01	0.413594	-0.15682	0.302173	0.585924	-0.475936	0.0143553	0.59366	0.901835	0.858484	0.712976	0.774642	0.986715
Sarnp	4.08794e+06	0.637	2.462	1.516	100	0.01	10.477	-0.650635	1.29983	0.60027	6.64386	-6.64386	3.38915	0.00621799	2.89909e-06	0.132318	2.67297e-16	2.21282e-16	2.24357e-16
Chmp2b	313686	1.075	0.865	0.959	6.516	100	100	0.104337	-0.209228	-0.0603973	2.70399	6.64386	6.64386	0.965238	0.880868	0.955295	3.46376e-06	2.21282e-16	2.24357e-16
Gipc1	511229	1.253	1.258	1.591	100		100	0.325386	0.331132	0.669934	6.64386	#VALUE!	6.64386	0.704054	0.849013	0.377298	2.67297e-16		2.24357e-16
Itpr3	549904	2.104	0.354	0.852	1.442	0.825	1.111	1.07313	-1.49818	-0.231075	0.528071	-0.277534	0.151859	0.00237759	8.73205e-08	0.787092	0.658588	0.914344	0.957028
KRT17	771886	1.141	1.229	1.605	0.915	0.513	0.468	0.190299	0.297485	0.682573	-0.128156	-0.962969	-1.09542	0.89008	0.874333	0.320961	0.866538	0.0399079	0.000142671
Tnpo1	773657	0.787	1.227	0.953	1.058	0.983	1.172	-0.345564	0.295135	-0.0694519	0.0813396	-0.0247367	0.228973	0.670887	0.878574	0.955295	0.987083	0.973626	0.901509
Clptm1l	520207	1.681	0.576	1.093	1.452	1.002	0.936	0.74932	-0.795859	0.128293	0.538041	0.00288251	-0.0954196	0.0725967	0.0504542	0.966763	0.703604	0.964994	0.92228
Gtf3c4	181916	0.818	1.421	1.262	1.347	0.767	1.121	-0.289827	0.506907	0.335712	0.42975	-0.382702	0.164786	0.809846	0.720978	0.917201	0.907	0.886966	0.972376
Gosr2	200289	0.904	1.752	1.418	1.442	0.629	1.11	-0.145605	0.809003	0.503858	0.528071	-0.668868	0.15056	0.930729	0.305673	0.817662	0.866257	0.624078	0.977734
Dnajc10	326353	0.924	0.913	0.832	1.049	1.106	1.074	-0.114035	-0.131313	-0.265345	0.0690147	0.145351	0.102994	0.93104	0.918715	0.829575	0.987083	0.90014	0.986592
Vcam1	2.33682e+06	0.931	0.962	0.894	0.957	1.258	1.136	-0.103147	-0.0558912	-0.161653	-0.0634092	0.331132	0.183963	0.90964	0.96515	0.878333	0.927195	0.539065	0.903281
Tars2	494032	0.985	1.167	1.083	1.554	0.979	1.357	-0.0218044	0.222805	0.115033	0.635987	-0.0306192	0.440421	0.991684	0.917913	0.977871	0.733261	0.973626	0.599615
Ankrd28	234925	1.151	1.013	1.31	1.391	0.787	1.111	0.202888	0.0186342	0.389567	0.476122	-0.345564	0.151859	0.894717	0.988849	0.868616	0.886412	0.920738	0.982367
Creld1	1.13612e+07	0.861	0.88	0.578	0.621	1.631	1.168	-0.215915	-0.184425	-0.790859	-0.687335	0.705757	0.22404	0.481968	0.610591	0.00155495	6.8241e-05	0.00134186	0.681345
Camk2g	3.68559e+06	1.172	0.787	0.918	0.01	100		0.228973	-0.345564	-0.123434	-6.64386	6.64386	#VALUE!	0.637518	0.375386	0.898857	2.67297e-16	2.21282e-16
S100a4	413563	0.975	1.296	1.172	1.624	1.11	1.801	-0.0365259	0.374066	0.228973	0.699552	0.15056	0.848798	0.985762	0.787999	0.936293	0.676752	0.906692	0.0925225
Cavin2	142111	1.181	0.619	0.777	1.387	0.732	0.809	0.240009	-0.691989	-0.364013	0.471968	-0.450084	-0.305788	0.871855	0.235233	0.76229	0.8927	0.843752	0.735456
mKIAA1031	337457	1.198	0.995	0.971	1.166	1.012	1.205	0.260628	-0.00723157	-0.0424568	0.221568	0.0172093	0.269033	0.822183	0.982356	0.961997	0.982417	0.958874	0.890011
Glyctk	252654	1.395	0.966	0.997	1.267	1.24	1.542	0.480265	-0.0499049	-0.00433459	0.341417	0.31034	0.624803	0.543147	0.966245	0.973644	0.930942	0.769133	0.399299
Wdr20rt	161381	1.069	100	100	1.284	1.294	1.745	0.0962619	6.64386	6.64386	0.360645	0.371838	0.803227	0.961465	3.30088e-16	2.92648e-16	0.93052	0.714152	0.19266
Pdpn	83887.8	0.473	1.128	0.468	0.988	1.278	1.321	-1.08009	0.173767	-1.09542	-0.0174171	0.353888	0.40163	0.0458552	0.977198	0.105109	0.960526	0.739565	0.816896
Paqr9	63695.5	0.562	1.356	0.769	0.827	1.014	0.852	-0.831358	0.439357	-0.378944	-0.274041	0.0200577	-0.231075	0.20529	0.856277	0.803628	0.843068	0.965382	0.865733
Golga2	832105	0.695	1.278	0.863	0.952	1.224	0.91	-0.524915	0.353888	-0.212568	-0.0709665	0.291604	-0.136062	0.321255	0.78598	0.858434	0.897211	0.696977	0.8829
Fam98b	866397	0.712	1.365	1.044	1.164	0.807	1.146	-0.490051	0.448901	0.0621217	0.219091	-0.309359	0.196607	0.379056	0.35584	0.991011	0.919269	0.815328	0.92519
Nup54	551428	0.741	1.628	1.11	1.146	0.5	0.408	-0.432455	0.703101	0.15056	0.196607	-1	-1.29336	0.520718	0.242196	0.968695	0.993318	0.128439	4.42986e-05
Camk2g	1.19091e+07	0.83	0.88	0.764	0.786	1.143	0.907	-0.268817	-0.184425	-0.388355	-0.347399	0.192825	-0.140826	0.217188	0.542536	0.111932	0.169878	0.665003	0.762881
Phkb	380353	1.033	0.983	1.028	1.598	0.406	0.843	0.0468403	-0.0247367	0.0398403	0.676267	-1.30045	-0.246395	0.982456	0.97273	0.995853	0.64788	0.0168605	0.766659
Mtmr12	98255.9	0.846	1.006	0.836	0.9	1.086	0.963	-0.24127	0.00863031	-0.258425	-0.152003	0.119024	-0.0543923	0.88828	0.969211	0.878768	0.896907	0.930549	0.956724
Ntng1	1.3809e+06	0.861	0.977	0.82	1.055	0.793	0.906	-0.215915	-0.0335695	-0.286304	0.077243	-0.334607	-0.142417	0.799037	0.978579	0.661897	0.987083	0.802622	0.876834
Nrbp2	2.72033e+06	0.875	1.179	1.035	1.157	1	1.228	-0.192645	0.237564	0.0496308	0.210389	0	0.296311	0.795659	0.835167	0.99674	0.922509	0.973626	0.691002
Arl2	393204	0.948	1.317	1.296	1.345	0.611	0.878	-0.077041	0.397255	0.374066	0.427606	-0.710756	-0.187707	0.961212	0.765207	0.851013	0.87692	0.587533	0.858817
Smad4	744077	0.957	0.976	0.957	1.334	1.029	1.542	-0.0634092	-0.0350469	-0.0634092	0.415759	0.041243	0.624803	0.961212	0.974827	0.955295	0.866538	0.94865	0.242582
Tcerg1	4.61586e+06	0.967	1.017	1.016	0.968	0.859	0.863	-0.0484122	0.0243197	0.0229004	-0.046921	-0.21927	-0.212568	0.972063	0.998109	0.989212	0.94807	0.889535	0.729138
Pycr3	5.81102e+06	1.017	1.078	1.082	1.491	0.68	1.081	0.0243197	0.108357	0.1137	0.57628	-0.556393	0.112367	0.972063	0.921259	0.933901	0.194757	0.0827613	0.934199
Carmil2	1.52797e+06	1.018	1.112	1.08	0.971	0.998	0.809	0.0257376	0.153157	0.111031	-0.0424568	-0.00288828	-0.305788	0.985762	0.90916	0.955295	0.951614	0.988875	0.424626
Lsm8	2.34482e+06	1.051	1.054	1.059	1.076	1.042	1.045	0.0717627	0.0758749	0.0827026	0.105678	0.0593553	0.0635029	0.961212	0.974443	0.979709	0.990026	0.94865	0.994541
Tra2a	2.18404e+06	1.113	0.905	0.982	1.131	0.783	0.912	0.154454	-0.14401	-0.0262051	0.177599	-0.352916	-0.132894	0.858104	0.896839	0.968695	0.94807	0.674802	0.871453
Nt5m	709073	1.118	1.271	1.553	1.503	0.687	1.1	0.16092	0.345964	0.635058	0.587845	-0.541618	0.137504	0.90964	0.804933	0.301379	0.699098	0.692535	0.96915
Kcnq2	1.16512e+06	1.156	0.84	0.823	1.175	0.882	0.991	0.209141	-0.251539	-0.281036	0.232661	-0.181149	-0.013043	0.85209	0.729247	0.694727	0.910524	0.924845	0.977734
Tbc1d9b	945501	1.17	0.94	1.109	1.249	0.928	1.15	0.226509	-0.0892673	0.149259	0.320773	-0.107803	0.201634	0.837219	0.927868	0.95288	0.897732	0.989261	0.92228
1810009N02Rik	739221	1.19	0.907	1.099	1.127	0.748	0.849	0.250962	-0.140826	0.136191	0.172488	-0.41889	-0.236164	0.796018	0.903409	0.95288	0.987083	0.636783	0.738774
Smarcc1	5.63568e+06	1.064	0.84	0.882	0.572	1.982	1.057	0.0894982	-0.251539	-0.181149	-0.805913	0.986957	0.0799754	0.89008	0.455568	0.735093	0.00502016	3.07413e-05	0.977734
Rnf126	306266	1.076	0.636	0.507	0.613	2.333	1.683	0.105678	-0.652901	-0.979942	-0.706041	1.22219	0.751035	0.961356	0.208424	0.0718394	0.328259	0.0161862	0.304214
Rwdd1	2.47486e+06	1.382	0.948	1.212	1	0.789	0.787	0.466758	-0.077041	0.27739	0	-0.341903	-0.345564	0.299375	0.943315	0.790457	0.974593	0.703879	0.442989
Commd9	1.88312e+06	0.697	1.978	1.275	0.93	1.123	1.197	-0.520769	0.984042	0.350497	-0.104697	0.167358	0.259423	0.213475	0.00259587	0.682151	0.866538	0.858811	0.873539
Cfap36	1.03115e+06	0.815	1.217	1.017	1.371	100	100	-0.295128	0.283329	0.0243197	0.455229	6.64386	6.64386	0.729323	0.78592	0.989372	0.827225	2.21282e-16	2.24357e-16
Tjp1	1.58748e+06	0.992	0.806	0.774	1.445	100	100	-0.011588	-0.311148	-0.369595	0.531069	6.64386	6.64386	0.98609	0.598256	0.495609	0.686245	2.21282e-16	2.24357e-16
Guk1	5.7879e+06	1.07	1.567	1.676	0.903	100	100	0.0976108	0.648005	0.745022	-0.147202	6.64386	6.64386	0.887352	0.0136346	0.00387121	0.866538	2.21282e-16	2.24357e-16
Chp1	2.94339e+06	1.013	2.075	2.046	100		100	0.0186342	1.05311	1.03281	6.64386	#VALUE!	6.64386	0.991684	0.000295193	0.000370812	2.67297e-16		2.24357e-16
Mtrex	347540	0.576	1.464	0.839	1.14	1.448	1.45	-0.795859	0.549916	-0.253257	0.189034	0.534062	0.536053	0.0744555	0.551244	0.85277	0.988454	0.471414	0.532756
Trip12	2.36452e+06	1.101	0.908	1.023	100	0.01	1.417	0.138814	-0.139236	0.0328061	6.64386	-6.64386	0.50284	0.88467	0.898166	0.999991	2.67297e-16	2.21282e-16	0.432805
Eif3m	2.31792e+06	0.719	1.49	1.046	1.058	1.578	1.546	-0.475936	0.575312	0.0648829	0.0813396	0.658097	0.62854	0.222526	0.139077	0.992578	0.993885	0.159646	0.238566
Abraxas2	778400	0.768	1.13	0.902	0.989	1.013	1.07	-0.380822	0.176323	-0.148801	-0.0159576	0.0186342	0.0976108	0.598531	0.923039	0.894068	0.945585	0.960968	0.986715
Adcy8	221402	0.768	1.926	1.691	1.874	0.69	1.267	-0.380822	0.945608	0.757877	0.906121	-0.535332	0.341417	0.689925	0.143803	0.509278	0.52398	0.774642	0.876834
Ncstn	309046	0.775	1.226	1.122	1.105	0.714	0.79	-0.367732	0.293959	0.166073	0.144046	-0.486004	-0.340075	0.633786	0.89745	0.970101	0.996025	0.782341	0.611833
Mrps35	1.71757e+06	0.791	1.18	0.891	1.093	1.156	1.294	-0.33825	0.238787	-0.166503	0.128293	0.209141	0.371838	0.564333	0.822834	0.843871	0.998267	0.808939	0.703242
Tkfc	632931	0.791	1.345	1.313	2.083	0.542	1.006	-0.33825	0.427606	0.392867	1.05866	-0.883635	0.00863031	0.674792	0.723634	0.851013	0.190278	0.314555	0.986715
Cnnm2	156517	0.82	1.192	0.961	1.103	0.654	0.84	-0.286304	0.253384	-0.0573917	0.141433	-0.612637	-0.251539	0.796018	0.923039	0.959937	0.994798	0.706347	0.803106
Bcam	687783	0.838	1.075	0.861	0.843	1.215	0.987	-0.254978	0.104337	-0.215915	-0.246395	0.280956	-0.018878	0.800023	0.974827	0.851013	0.772543	0.746512	0.977734
Opcml	7.002e+06	0.867	0.98	0.848	0.855	0.916	0.803	-0.205896	-0.0291463	-0.237864	-0.226004	-0.12658	-0.316528	0.676369	0.966572	0.616786	0.52398	0.924845	0.168026
Chmp4b	2.83097e+07	0.88	1.223	1.019	100		100	-0.184425	0.290424	0.0271541	6.64386	#VALUE!	6.64386	0.410581	0.226581	0.996392	2.67297e-16		2.24357e-16
Tm9sf3	892300	2.226	0.549	1.302	2.505	0.514	1.259	1.15445	-0.865122	0.380729	1.32481	-0.96016	0.332278	1.19106e-05	0.00620918	0.577335	7.72852e-05	0.0246932	0.676549
Homer2	4.06164e+06	0.908	0.933	1.062	0.925	0.942	0.881	-0.139236	-0.100051	0.0867838	-0.112475	-0.086201	-0.182786	0.847928	0.901835	0.955295	0.732406	0.960628	0.532756
Prickle2	273075	0.914	0.989	0.898	0.913	0.919	0.849	-0.129734	-0.0159576	-0.155213	-0.131313	-0.121863	-0.236164	0.919207	0.977198	0.905355	0.8927	0.996944	0.785252
Ubxn4	74409.2	0.917	0.723	0.979	1.106	0.887	1.116	-0.125006	-0.467932	-0.0306192	0.145351	-0.172994	0.158337	0.94135	0.558799	0.961997	0.994453	0.958874	0.953045
Aox1	197846	0.917	1.3	1.231	1.546	1.108	1.73	-0.125006	0.378512	0.299831	0.62854	0.147958	0.790772	0.940511	0.852481	0.919639	0.79213	0.915555	0.230658
Rprd1b	800782	0.937	1.275	1.187	1.013	0.817	0.752	-0.093879	0.350497	0.24732	0.0186342	-0.291592	-0.411195	0.939912	0.723863	0.890486	0.965617	0.933686	0.493344
Luzp1	1.13121e+06	0.945	0.825	0.83	0.75	1.165	0.733	-0.0816138	-0.277534	-0.268817	-0.415037	0.22033	-0.448115	0.953162	0.759706	0.810543	0.399233	0.765365	0.297708
Mrpl23	5.681e+06	0.962	0.922	0.907	1.114	0.946	1.075	-0.0558912	-0.117161	-0.140826	0.155749	-0.0800879	0.104337	0.961356	0.855058	0.836026	0.960526	0.964994	0.963503
Rer1	4.51683e+06	0.999	1.007	1.142	1.19	0.858	1	-0.00144342	0.0100637	0.191563	0.250962	-0.22095	0	0.996042	0.996444	0.843871	0.881742	0.789849	0.982184
Dhodh	1.84149e+06	1.038	0.981	1.017	1.087	1.083	1.238	0.0538064	-0.027675	0.0243197	0.120352	0.115033	0.308011	0.985762	0.975707	0.985483	0.986587	0.90156	0.780316
Tcp11l1	926102	1.054	1.024	1.077	1.247	0.867	1.149	0.0758749	0.0342157	0.107018	0.318461	-0.205896	0.200379	0.970624	0.999791	0.973644	0.927136	0.971664	0.930204
Snx30	864125	1.062	1.25	1.335	1.884	0.627	1.136	0.0867838	0.321928	0.41684	0.913799	-0.673463	0.183963	0.961465	0.762711	0.657828	0.179667	0.457359	0.934369
Rabgap1	2.48587e+06	1.078	0.902	0.948	1.298	0.844	1.11	0.108357	-0.148801	-0.077041	0.37629	-0.244685	0.15056	0.906211	0.895657	0.930634	0.746249	0.864802	0.92228
F8a1	222387	1.085	1.348	1.48	1.425	0.726	1.094	0.117695	0.43082	0.565597	0.510962	-0.461959	0.129613	0.953931	0.749353	0.626747	0.866131	0.811663	0.985307
Slc4a8	2.18595e+06	1.092	0.869	0.974	1.089	0.88	0.993	0.126973	-0.202572	-0.0380063	0.123004	-0.184425	-0.0101344	0.894717	0.802714	0.959199	0.987083	0.924845	0.982106
Ilkap	364395	1.099	1.091	1.225	1.885	0.586	1.135	0.136191	0.125651	0.292782	0.914565	-0.771027	0.182692	0.93368	0.975707	0.907977	0.473802	0.509046	0.949411
Pde8b	491979	1.104	1.21	1.008	0.934	0.772	0.638	0.14274	0.275007	0.0114956	-0.0985055	-0.373327	-0.648372	0.924471	0.895657	0.982523	0.921609	0.886966	0.114107
Pabpc1	6.37039e+06	1.053	0.968	0.959	1.253	1.321	1.588	0.0745054	-0.046921	-0.0603973	0.325386	0.40163	0.667211	0.907762	0.949062	0.931746	0.604514	0.0993209	0.000873926
Cntfr	1.85627e+06	1.133	0.688	0.769	0.939	0.887	0.787	0.180148	-0.53952	-0.378944	-0.0908029	-0.172994	-0.345564	0.847928	0.14384	0.341642	0.875849	0.942337	0.409151
Fga	1.09773e+07	0.728	1.355	0.882	0.749	1.472	1.166	-0.45799	0.438293	-0.181149	-0.416962	0.557778	0.221568	0.00942881	0.0481149	0.753992	0.0543811	0.0121601	0.566999
Aass	265344	1.157	0.854	0.918	1.408	1.089	1.58	0.210389	-0.227692	-0.123434	0.493647	0.123004	0.659925	0.894717	0.855424	0.924937	0.852472	0.913952	0.257814
Fbxo6	879284	1.172	0.939	1.021	1.042	0.883	0.995	0.228973	-0.0908029	0.0299829	0.0593553	-0.179515	-0.00723157	0.847928	0.93468	0.992578	0.982417	0.969704	0.977176
Pds5b	257450	1.101	0.804	0.86	2.359	0.752	1.885	0.138814	-0.314733	-0.217591	1.23818	-0.411195	0.914565	0.939725	0.75865	0.894068	0.166498	0.866034	0.0704292
Zmpste24	257598	1.193	1.232	1.473	1.652	1.104	1.767	0.254594	0.301002	0.558757	0.724214	0.14274	0.821302	0.86271	0.898166	0.691387	0.64788	0.901483	0.123722
Haghl	339656	1.223	0.715	0.841	0.917	0.956	0.891	0.290424	-0.483985	-0.249822	-0.125006	-0.0649175	-0.166503	0.781684	0.436168	0.832266	0.8927	0.984396	0.876584
Chm	1.24199e+06	1.234	0.948	1.243	1.023	1.02	1.004	0.303342	-0.077041	0.313826	0.0328061	0.0285692	0.00575927	0.683861	0.95238	0.767945	0.987083	0.964994	0.985307
Epn2	2.63935e+06	1.046	0.657	0.737	0.569	1.921	0.964	0.0648829	-0.606035	-0.440263	-0.813499	0.941858	-0.0528949	0.956517	0.0236022	0.217953	0.000237241	4.15158e-06	0.941263
Tpbg	1.14561e+06	1.247	0.797	0.982	1.003	0.843	0.877	0.318461	-0.327348	-0.0262051	0.00432161	-0.246395	-0.189351	0.674556	0.575177	0.970101	0.960384	0.915555	0.8111
Trappc14	665314	1.33	1.098	1.474	2.792	0.51	1.248	0.411426	0.134878	0.559737	1.4813	-0.971431	0.319618	0.56716	0.958655	0.363707	0.00239543	0.151183	0.785252
Rsu1	1.11924e+06	0.89	1.542	1.242	3.162		1.382	-0.168123	0.624803	0.312665	1.66084	#VALUE!	0.466758	0.892151	0.152514	0.823566	0.0382435		0.73605
Scyl1	256662	2.46	0.732	2.105	3.019	0.747	2.542	1.29866	-0.450084	1.07382	1.59407	-0.42082	1.34596	0.000154177	0.544995	0.0214176	0.00437657	0.886966	8.39994e-05
Fam210a	336716	0.568	4.352	2.693	4.098	0.515	1.629	-0.816037	2.12168	1.42921	2.03492	-0.957356	0.703987	0.0555345	2.36697e-07	0.0161082	0.00153238	0.235006	0.304214
Cbx5	161208	1.725	0.75	1.275	1.375	1.001	1.308	0.786596	-0.415037	0.350497	0.459432	0.00144197	0.387363	0.0942347	0.591084	0.844568	0.834298	0.964994	0.687037
Grpel1	821244	6.305	0.347	2.448	1.065	1.218	1.3	2.6565	-1.52699	1.2916	0.0908534	0.284514	0.378512	2.80253e-16	1.08435e-08	9.76154e-09	0.990615	0.714152	0.713223
Cul9	158253	0.816	2.516	1.966	1.728	0.435	0.745	-0.293359	1.33113	0.975263	0.789103	-1.20091	-0.424688	0.809986	0.0209186	0.258403	0.64788	0.101	0.579069
Nprl2	139960	0.981	1.498	1.647	1.474	100	100	-0.027675	0.583038	0.719841	0.559737	6.64386	6.64386	0.994303	0.665295	0.585367	0.836607	2.21282e-16	2.24357e-16
Arhgdib	2.08676e+06	1.017	1.171	1.127	100		100	0.0243197	0.227741	0.172488	6.64386	#VALUE!	6.64386	0.98609	0.843597	0.923842	2.67297e-16		2.24357e-16
Daglb	444359	0.01	100		1.034	1.254	1.287	-6.64386	6.64386	#VALUE!	0.0482362	0.326537	0.364012	2.80253e-16	3.30088e-16		0.974593	0.689509	0.720498
Ube3c	1.16965e+06	2.938	1.307	3.159	1.131	0.893	1.122	1.55483	0.386259	1.65947	0.177599	-0.163268	0.166073	4.30469e-14	0.650384	1.0141e-12	0.959046	0.97529	0.931364
Jak1	148800	0.858	0.866	0.769	1.067	0.713	0.835	-0.22095	-0.207561	-0.378944	0.0935602	-0.488026	-0.260152	0.894296	0.888085	0.777013	0.987083	0.811663	0.803106
Txndc15	524370	0.912	1.147	1.052	0.956	1.718	1.596	-0.132894	0.197865	0.0731347	-0.0649175	0.78073	0.674461	0.924471	0.93037	0.996138	0.930942	0.188235	0.259657
Wdr48	1.75191e+06	1.527	1.597	1.45	1.173	0.727	0.889	0.6107	0.675364	0.536053	0.230203	-0.459973	-0.169745	0.0243801	0.0662244	0.172888	0.907286	0.432897	0.82724
Pip5k1a	1.0891e+06	0.794	1.507	1.213	1.037	1.152	1.212	-0.332789	0.591679	0.27858	0.0524159	0.204141	0.27739	0.68144	0.19286	0.851013	0.979906	0.81627	0.865815
Mindy1	2.04404e+06	0.857	0.861	0.711	1.266	1.124	1.325	-0.222633	-0.215915	-0.492079	0.340277	0.168642	0.405992	0.768697	0.779817	0.170939	0.827195	0.83958	0.486456
	1.90462e+06	1.013	0.929	0.908	0.96	1.426	1.352	0.0186342	-0.106249	-0.139236	-0.0588937	0.511974	0.435095	0.99982	0.922157	0.874362	0.936607	0.158852	0.390016
Nup93	167143	1.055	1.385	1.476	1.832	0.779	0.873	0.077243	0.469886	0.561693	0.87342	-0.360305	-0.195946	0.97244	0.730777	0.708143	0.576058	0.901483	0.875597
Slc23a2	1.26448e+06	0.924	1.012	1.033	0.727	1.65	1.185	-0.114035	0.0172093	0.0468403	-0.459973	0.722466	0.244887	0.939708	0.999791	0.998977	0.308841	0.0395616	0.885001
Gpcpd1	244817	1.333	1.156	1.503	1.968	100	100	0.414677	0.209141	0.587845	0.97673	6.64386	6.64386	0.656987	0.943361	0.650505	0.424312	2.21282e-16	2.24357e-16
Dlg3	67544	0.418	1.019	0.417	0.614	1.067	0.782	-1.25843	0.0271541	-1.26188	-0.703689	0.0935602	-0.354759	0.0129714	0.975281	0.0531554	0.452537	0.942337	0.716464
	662250	0.656	1.029	0.682	0.689	0.834	0.577	-0.608232	0.041243	-0.552156	-0.537424	-0.261881	-0.793357	0.202403	0.998945	0.369082	0.355632	0.942337	0.027185
Aldh3b1	2.43329e+06	0.843	0.96	0.853	1.046	1.025	1.095	-0.246395	-0.0588937	-0.229382	0.0648829	0.0356239	0.130931	0.704054	0.961202	0.6754	0.999873	0.971664	0.944152
Znf512	1.92347e+06	0.868	1.109	0.995	0.843	1.069	0.872	-0.204233	0.149259	-0.00723157	-0.246395	0.0962619	-0.1976	0.7884	0.920045	0.971048	0.72958	0.915555	0.757497
Mrps2	160105	0.905	1.304	0.592	2.209	0.439	0.82	-0.14401	0.382944	-0.756331	1.14339	-1.18771	-0.286304	0.935822	0.845952	0.32323	0.291457	0.107913	0.802884
Cfb	6.30851e+06	1.355	0.753	1.105	0.853	0.813	0.675	0.438293	-0.409278	0.144046	-0.229382	-0.298673	-0.567041	0.021545	0.0659501	0.883269	0.579747	0.549964	0.00255414
Zfand5	623458	0.942	1.026	0.938	0.987	1.283	1.078	-0.086201	0.0370307	-0.0923402	-0.018878	0.359521	0.108357	0.959811	0.998945	0.933901	0.941292	0.625086	0.983612
[truncated: 2,694 more rows]

## Sheet: CTX SHAM
Gene Symbol	Abundances (Grouped): ctx, sham	Abundance Ratio: (ctx, pte plus) / (ctx, pte minus)	Abundance Ratio: (ctx, pte minus) / (ctx, sham)	Abundance Ratio: (ctx, pte plus) / (ctx, sham)	Abundance Ratio: (hpc, pte plus) / (hpc, pte minus)	Abundance Ratio: (hpc, pte minus) / (hpc, sham)	Abundance Ratio: (hpc, pte plus) / (hpc, sham)	Log2FC PTE-vPTE+CTX	Log2FCPTE-vSHAMCTX	Log2FCPTE+vSHAMCTX	Log2FC PTE-vPTE+HPC	Log2FCPTE-vSHAMHPC	Log2FCPTE+vSHAMHPC	Abundance Ratio Adj. P-Value: (ctx, pte plus) / (ctx, pte minus)	Abundance Ratio Adj. P-Value: (ctx, pte minus) / (ctx, sham)	Abundance Ratio Adj. P-Value: (ctx, pte plus) / (ctx, sham)	Abundance Ratio Adj. P-Value: (hpc, pte plus) / (hpc, pte minus)	Abundance Ratio Adj. P-Value: (hpc, pte minus) / (hpc, sham)	Abundance Ratio Adj. P-Value: (hpc, pte plus) / (hpc, sham)
[truncated: 3,075 more rows]

[truncated: 3 more sheets: HPC PTE+, HPC PTE-, HPC SHAM]
