# Supplementary material for: Applying Proteomics and Computational Approaches to Identify Novel Targets in Blast-Associated Post-Traumatic Epilepsy
Source: Int J Mol Sci. 2024 Mar 1;25(5):2880. doi: 10.3390/ijms25052880 (PMC10932294; doi:10.3390/ijms25052880)
Supplement: Supplementary file 1 [file ijms-25-02880-s001.zip › Supplemental Table S2.xlsx]

## Sheet: CTX PTE+ v PTE-
Gene_Symbol	Abundance Ratio: (ctx, pte plus) / (ctx, pte minus)	Log2FC	padj
Abca2	0.01	-6.64386	2.8e-16
Abi3	0.01	-6.64386	2.8e-16
Apc	0.01	-6.64386	2.8e-16
Atp2b2	0.01	-6.64386	2.8e-16
Cpox	0.01	-6.64386	2.8e-16
Daglb	0.01	-6.64386	2.8e-16
Dnajb5	0.01	-6.64386	2.8e-16
Kcnn2	0.01	-6.64386	2.8e-16
Krt18	0.01	-6.64386	2.8e-16
Lman2	0.01	-6.64386	2.8e-16
Mvp	0.01	-6.64386	2.8e-16
Ryr3	0.01	-6.64386	2.8e-16
Saal1	0.01	-6.64386	2.8e-16
Spryd4	0.01	-6.64386	2.8e-16
Washc1	0.01	-6.64386	2.8e-16
Washc4	0.01	-6.64386	2.8e-16
Zng1	0.01	-6.64386	2.8e-16
Lamp1	0.021	-5.57347	2.8e-16
Sec31b	0.296	-1.75633	2.8e-16
Tmed4	0.327	-1.61264	6.25e-05
Dpp10	0.333	-1.58641	2.23e-07
Ttbk1	0.333	-1.58641	5.52e-05
TIAM2	0.401	-1.31833	2.8e-16
Mark3	0.412	-1.27928	4.52e-09
Cyp51a1	0.414	-1.2723	0.00287137
Dlg3	0.418	-1.25843	0.0129714
Cpne7	0.437	-1.19429	2.63e-05
Shd	0.446	-1.16488	2.8e-16
Smim26	0.446	-1.16488	0.00056579
Gan	0.451	-1.1488	6.5e-07
S100a9	0.451	-1.1488	5.54e-05
Ndc1	0.454	-1.13924	0.0093147
Rap1a	0.459	-1.12343	7.68e-06
Hmgn5	0.462	-1.11404	0.0207941
Abhd17b	0.466	-1.1016	0.0016173
Pdpn	0.473	-1.08009	0.0458552
Plekhg6	0.482	-1.05289	4.31e-05
Tomm40l	0.492	-1.02327	0.000730297
MAPT	0.514	-0.96016	0.037557
2410002F23Rik	0.515	-0.957356	0.012753
Mblac2	0.528	-0.92139	1.45e-09
Slc43a2	0.542	-0.883635	0.0175064
Spata2l	0.546	-0.873027	0.0556753
Id4	0.554	-0.852042	2.8e-16
Abca7	0.563	-0.828793	0.0257439
Fam210a	0.568	-0.816037	0.0555345
Eif3g	0.572	-0.805913	0.031442
Klhl22	0.575	-0.798366	0.0047405
Mtrex	0.576	-0.795859	0.0744555
Trappc10	0.576	-0.795859	0.0161982
Ndrg2	0.583	-0.778432	8.49e-07
Immt	0.586	-0.771027	0.00366855
Itih1	0.587	-0.768568	0.0190477
Araf	0.593	-0.753896	1.44e-09
Rab15	0.594	-0.751465	0.0691866
Speg	0.597	-0.744197	0.0565052
Lpcat1	0.604	-0.72738	0.086938
Mark2	0.605	-0.724993	4.08e-06
Igh	0.607	-0.720232	6.02e-06
Gpr37l1	0.608	-0.717857	8.62e-06
Krt90	0.615	-0.701342	2e-10
Ache	0.617	-0.696658	0.000286065
Sarnp	0.637	-0.650635	0.00621798
Ndufv3	0.64	-0.643856	0.0130763
KRT1	0.67	-0.577767	2.8e-16
Vamp1	0.676	-0.564905	0.00118517
KRT9	0.679	-0.558517	2.8e-16
HC	0.68	-0.556393	0.0733437
FAM120A	0.686	-0.54372	0.0423653
Cacna1b	0.687	-0.541618	0.0744555
Igkc	0.687	-0.541618	0.0257439
Fabp7	0.695	-0.524915	2.47e-05
Hdac2	0.701	-0.512514	0.0203812
Igha	0.704	-0.506353	0.0699465
Eef1d	0.706	-0.50226	0.0455487
Cacna2d2	0.708	-0.498179	0.0201393
Fgb	0.71	-0.494109	0.029535
Thrap3	0.722	-0.469929	0.0126078
Fga	0.728	-0.45799	0.00942881
Cenpv	0.731	-0.452057	0.0658173
Serpina1b	0.735	-0.444184	0.0110429
Kmt2a	0.737	-0.440263	0.0217959
Tmpo	0.742	-0.430509	0.00853865
Cd47	0.748	-0.41889	0.00167058
Ampd2	0.761	-0.394032	0.00848901
KRT10	0.762	-0.392137	1.82e-07
Bub3	0.764	-0.388355	0.057783
Ccdc88b	0.764	-0.388355	0.0172448
Ftl1	0.766	-0.384584	0.029867
Marcks	0.771	-0.375197	2.44e-08
Serpina3k	0.774	-0.369595	0.000344355
Hapln2	0.779	-0.360305	0.0139026
Crnkl1	0.782	-0.354759	1.66e-08
Fxyd6	0.782	-0.354759	0.00963401
Fkbp15	0.795	-0.330973	0.0300525
KRT6A	0.806	-0.311148	0.0121709
Atp5mg	0.812	-0.300448	0.0253331
Tuba1c	0.812	-0.300448	3.37e-06
Usp46	0.816	-0.293359	0.0732676
Septin7	0.817	-0.291592	0.0119966
Pzp	0.819	-0.288065	0.000226736
Tubal3	0.821	-0.284546	0.0276127
Hexb	0.823	-0.281036	0.0691866
Acyp1	1.202	0.265437	0.0699465
Slc44a1	1.203	0.266637	0.0183357
Rab14	1.204	0.267835	0.000225708
Rap1b	1.207	0.271426	0.067343
Atp5mk	1.211	0.276199	0.00102379
Nd5	1.213	0.27858	0.0330774
Rab5c	1.213	0.27858	0.0145568
Phb1	1.215	0.280956	0.000209399
Atp5f1e	1.217	0.283329	0.00761739
Strn	1.217	0.283329	0.0477075
Mtx2	1.222	0.289244	0.00892162
Rogdi	1.222	0.289244	0.0785554
Cldn11	1.223	0.290424	0.00595282
Rab11b	1.227	0.295135	0.000419704
Btbd17	1.229	0.297485	0.0744555
Fam169a	1.23	0.298658	0.0933964
Lypla2	1.234	0.303342	0.0188377
Akr1b3	1.235	0.304511	0.00291752
Lrrc57	1.241	0.311503	0.0698474
Psmd8	1.247	0.318461	0.0476593
Ak9	1.248	0.319618	0.078979
NEDD8	1.252	0.324235	0.0384202
Eno3	1.264	0.337996	0.00445387
Dynlrb1	1.266	0.340277	0.00853551
Acly	1.278	0.353888	0.0144252
Grm7	1.281	0.35727	0.0401657
Psd	1.289	0.366252	0.0798115
Chmp6	1.299	0.377401	0.0676185
Cox5b	1.314	0.393965	2.17e-05
Tubb2b	1.323	0.403813	6.29e-06
Rab12	1.339	0.421156	0.057031
Snrpd2	1.342	0.424385	0.00234779
Agfg1	1.345	0.427606	0.000138073
Nova1	1.348	0.43082	0.00966453
Cfb	1.355	0.438293	0.021545
COX1	1.355	0.438293	2.03e-07
Sh3bgrl3	1.358	0.441483	0.00221515
Dazap1	1.359	0.442545	0.000780272
Gm5157	1.359	0.442545	2.26e-06
Acot13	1.364	0.447844	5.48e-06
Tomm22	1.39	0.475085	0.000264751
Ca14	1.399	0.484396	0.0802601
Wdfy1	1.409	0.494672	0.000290867
Septin5	1.428	0.513996	0.0456386
Vps16	1.44	0.526069	0.0969128
Slc38a3	1.445	0.531069	0.00237783
Arl8a	1.453	0.539035	0.00274842
H1f5	1.453	0.539035	0.0300525
Hnrnpk	1.456	0.54201	0.000137902
Pptc7	1.456	0.54201	0.0537342
Cacnb1	1.479	0.564622	0.0620074
Tbc1d17	1.483	0.568519	0.0275861
Cygb	1.496	0.58111	0.0851597
Scai	1.538	0.621056	0.00809429
Atp5mc1	1.57	0.650765	0.0423653
Coq6	1.596	0.674461	0.00449196
Usp24	1.634	0.708408	0.00405549
5730455P16Rik	1.645	0.718088	0.0526402
Clptm1l	1.681	0.74932	0.0725967
Tmem132b	1.689	0.756169	0.0607163
Cbx5	1.725	0.786596	0.0942347
Psmb2	1.729	0.789938	4.52e-12
Slc4a7	1.742	0.800745	0.0477075
Iba57	1.784	0.835116	2.96e-05
Prps1l1	1.793	0.842375	0.0720586
Nnt	1.804	0.851199	2.8e-16
Kndc1	1.894	0.921436	0.0477075
Psmg1	1.956	0.967906	0.0127691
Bbs1	1.97	0.978196	0.0343039
Sephs2	1.981	0.986229	0.00721025
Map7	2.032	1.0229	0.0182885
Ap3s2	2.057	1.04054	1.38e-05
Itpr3	2.104	1.07313	0.00237759
Stxbp1	2.116	1.08134	5.96e-12
Wdr54	2.148	1.10299	2.56e-09
HRNR	2.172	1.11902	0.0274493
Themis2	2.174	1.12035	2.8e-16
Serpinc1	2.179	1.12367	3.21e-05
Lrrc40	2.19	1.13093	0.0015893
Tm9sf3	2.226	1.15445	1.19e-05
Rragb	2.288	1.19409	4.52e-09
Kcnj6	2.314	1.21039	0.000294421
Lars2	2.33	1.22033	0.0012821
Dcdc2a	2.335	1.22342	7.81e-08
Vdac3	2.35	1.23266	8.84e-07
Scyl1	2.46	1.29866	0.000154177
Elmo2	2.475	1.30743	3.05e-09
Selenot	2.563	1.35783	4.18e-07
Prmt8	2.784	1.47716	2.8e-16
Ppp2ca	2.873	1.52256	2.8e-16
Sap18b	2.913	1.54251	6.38e-06
Zfp91	2.92	1.54597	1.86e-08
Rnf20	3.063	1.61495	1.73e-07
Prxl2b	3.249	1.7	2.8e-16
Tgfb1i1	5.478	2.45365	2.8e-16
Cp	5.731	2.51879	2.8e-16
Grpel1	6.305	2.6565	2.8e-16
Acbd6	11.015	3.4614	2.8e-16
Cap2	11.407	3.51185	2.8e-16
Kif20b	28.798	4.8479	2.8e-16
Akt2	100	6.64386	2.8e-16
Anapc1	100	6.64386	2.8e-16
Cpne2	100	6.64386	2.8e-16
Dyrk1a	100	6.64386	2.8e-16
Fam171b	100	6.64386	2.8e-16
Fbxo21	100	6.64386	2.8e-16
Git2	100	6.64386	2.8e-16
H2az2	100	6.64386	2.8e-16
Kcnj9	100	6.64386	2.8e-16
Mrpl39	100	6.64386	2.8e-16
Plscr3	100	6.64386	2.8e-16
Rtn3	100	6.64386	2.8e-16
Sec23b	100	6.64386	2.8e-16
Senp8	100	6.64386	2.8e-16
Sh2b1	100	6.64386	2.8e-16
Shank2	100	6.64386	2.8e-16
Snrk	100	6.64386	2.8e-16
Spast	100	6.64386	2.8e-16
Spryd7	100	6.64386	2.8e-16
Syngap1	100	6.64386	2.8e-16
Trp53bp1	100	6.64386	2.8e-16

## Sheet: HPC PTE- v SHAM
Gene_Symbol	Abundance Ratio: (ctx, pte plus) / (ctx, pte minus)	Log2FC	padj
Anapc1	0.01	-6.64386	2.21e-16
Apc	0.01	-6.64386	2.21e-16
Nat14	0.01	-6.64386	2.21e-16
Klc2	0.01	-6.64386	2.21e-16
Anxa7	0.01	-6.64386	2.21e-16
Zfp91	0.01	-6.64386	2.21e-16
Pacs1	0.01	-6.64386	2.21e-16
Trip12	0.01	-6.64386	2.21e-16
Mlc1	0.01	-6.64386	2.21e-16
Itpr2	0.01	-6.64386	2.21e-16
Tbc1d15	0.01	-6.64386	2.21e-16
Sipa1l3	0.01	-6.64386	2.21e-16
Cars2	0.01	-6.64386	2.21e-16
Matk	0.01	-6.64386	2.21e-16
Cap2	0.03	-5.05889	2.21e-16
Atp5mc1	0.066	-3.92139	2.21e-16
Tmed4	0.083	-3.59074	8.13e-14
Chmp6	0.096	-3.38082	2.21e-16
Gmpr2	0.181	-2.46594	1.17e-07
Ttbk1	0.182	-2.45799	7.36e-07
HRNR	0.182	-2.45799	7.36e-07
Ogfod1	0.193	-2.37333	1.78e-06
Ptpn5	0.249	-2.00578	1.07e-05
Krt90	0.253	-1.98279	2.21e-16
Dsp	0.267	-1.90509	4.34e-06
Ak9	0.277	-1.85204	2.21e-16
COX1	0.28	-1.8365	2.21e-16
Fnbp1	0.308	-1.699	6.29e-06
Ncoa5	0.313	-1.67577	3.92e-07
Naga	0.319	-1.64837	0.00318311
Tubb2b	0.331	-1.5951	2.21e-16
Atg9a	0.335	-1.57777	0.000777426
Impdh2	0.344	-1.53952	0.0110295
Rab11fip5	0.35	-1.51457	2.83e-06
Macrod2	0.35	-1.51457	2.41e-14
Septin5	0.356	-1.49005	8.73e-08
Arhgap12	0.358	-1.48197	2.53e-07
KRT1	0.361	-1.46993	2.21e-16
KRT9	0.362	-1.46594	2.21e-16
Stxbp1	0.368	-1.44222	2.41e-09
Zbtb18	0.368	-1.44222	0.00272422
Slc24a2	0.379	-1.39973	0.00735979
Rpl22l1	0.381	-1.39214	3.22e-05
Pcbp2	0.395	-1.34008	0.0128921
KRT14	0.397	-1.33279	2.21e-16
Phkb	0.406	-1.30045	0.0168605
Nudt2	0.408	-1.29336	0.0172416
Dr1	0.408	-1.29336	0.0211609
Dpp10	0.413	-1.27579	0.061421
Mtx1	0.415	-1.26882	0.000599912
Ppp6r3	0.422	-1.24469	0.0306178
Nwd2	0.428	-1.22432	0.00425902
KRT10	0.432	-1.2109	2.21e-16
Immt	0.44	-1.18442	6.24e-05
Cdkl5	0.448	-1.15843	2.13e-08
Gclc	0.449	-1.15521	3.14e-05
Lrrc73	0.449	-1.15521	0.00302939
Dock7	0.452	-1.14561	0.093433
ND2	0.452	-1.14561	0.000519811
Mboat7	0.458	-1.12658	0.000120286
Svop	0.459	-1.12343	2.37e-06
Anxa1	0.461	-1.11716	0.039863
TIAM2	0.463	-1.11092	2.21e-16
Ccdc22	0.467	-1.09851	0.0704984
Adcy5	0.478	-1.06492	2.83e-05
Eif2b5	0.48	-1.05889	0.00161197
Btf3	0.48	-1.05889	0.000984991
Hnrnpul1	0.483	-1.0499	0.023542
Dctn6	0.485	-1.04394	8.21e-07
Krt28	0.487	-1.03801	0.0122227
H3-3a; H3-3b	0.488	-1.03505	2.83e-08
Sestd1	0.493	-1.02034	0.012038
KRT6A	0.498	-1.00578	2.21e-16
5730455P16Rik	0.506	-0.982791	0.0165681
Anxa2	0.509	-0.974262	0.0102787
KRT17	0.513	-0.962969	0.0399079
Usp15	0.513	-0.962969	0.00709105
Tm9sf3	0.514	-0.96016	0.0246932
Aplp2	0.515	-0.957356	0.0478631
Gpc6	0.519	-0.946194	0.00727754
Gnpda2	0.519	-0.946194	1.46e-05
Loxhd1	0.521	-0.940645	2.91e-12
Cd47	0.522	-0.937878	3.38e-08
Homer3	0.527	-0.924125	0.000587456
Cryl1	0.532	-0.910502	0.0296426
Acy1	0.536	-0.899695	0.0392128
Vps16	0.537	-0.897006	0.0431675
Cacng3	0.546	-0.873027	0.000117033
Rptor	0.549	-0.865122	0.015565
Slc6a7	0.551	-0.859876	0.000109129
Kif20b	0.554	-0.852042	0.000117033
Shank2	0.56	-0.836501	0.0615831
Atp6v0c	0.567	-0.818579	2.21e-16
Crnkl1	0.569	-0.813499	2.21e-16
D630045J12Rik	0.58	-0.785875	0.0916438
Sf1	0.594	-0.751465	0.0646826
Nova1	0.596	-0.746616	0.00129583
Eipr1	0.599	-0.739372	0.0024067
Atp4a	0.601	-0.734563	2e-05
Slc1a1	0.602	-0.732165	0.0108551
Diaph1	0.603	-0.72977	1.93e-14
Slc1a2	0.608	-0.717857	0.0937811
Ech1	0.613	-0.706041	0.096246
Plxnb2	0.615	-0.701342	0.081079
ND2	0.617	-0.696658	0.0119121
Ank2	0.621	-0.687335	0.0147967
Enpp6	0.632	-0.662004	0.000276451
Ptpn23	0.633	-0.659723	0.000538609
Tom1	0.638	-0.648372	0.00859814
Snrpd2	0.641	-0.641604	0.00582106
Nt5c2	0.643	-0.637109	0.0892183
Gldc	0.645	-0.632629	0.0362321
Cat	0.646	-0.630394	0.0122106
Iba57	0.648	-0.625934	0.0502312
	0.651	-0.619271	0.0161875
Slc22a1	0.655	-0.610433	7.22e-05
Pgk1	0.664	-0.590745	0.023662
Gng4	0.667	-0.584241	0.000628461
Tubal3	0.671	-0.575615	0.000192237
Mapt	0.674	-0.56918	0.00354198
Pycr3	0.68	-0.556393	0.0827613
Cpm	0.684	-0.547932	0.05689
Ndufa1	0.684	-0.547932	0.0481115
Wdfy1	0.685	-0.545824	0.0190971
KRT16	0.686	-0.54372	8.99e-08
Cops8	0.691	-0.533242	0.0527213
Asphd2	0.696	-0.522841	0.0092856
Ube2d3	0.699	-0.516636	0.0713483
Hpx	0.702	-0.510457	0.0721649
Clint1	0.704	-0.506353	0.0394798
Scn8a	0.71	-0.494109	0.0840947
KRT5	0.714	-0.486004	0.0231098
Agfg1	0.715	-0.483985	0.00293826
KRT2	0.716	-0.481969	4.03e-06
Fxyd1	0.72	-0.473931	1.96e-05
Gm5157	0.722	-0.469929	0.00253932
Nd5	0.726	-0.461959	0.0346063
Mlec	0.729	-0.456009	0.0998321
Abhd12	0.73	-0.454032	0.0453737
Slc7a5	0.733	-0.448115	0.0106534
Mgst3	0.733	-0.448115	0.0106534
Slain1	0.734	-0.446148	2.31e-05
Mcu	0.736	-0.442222	0.0125666
Csl	0.737	-0.440263	0.0112193
Slc30a3	0.738	-0.438307	0.0137268
Tiprl	0.738	-0.438307	0.0477073
Aqp4	0.751	-0.413115	0.00163427
Olfm1	0.752	-0.411195	0.000258657
Mlf2	0.754	-0.407364	0.0159781
Tceal5	0.758	-0.39973	0.0887357
Bicd1	0.758	-0.39973	0.0368732
Cds2	0.759	-0.397828	0.0373274
Cd9	0.761	-0.394032	0.0214821
Sdhc	0.766	-0.384584	0.0260648
Calm5	0.77	-0.37707	0.00069832
ND1	0.77	-0.37707	0.0528773
Mtco2	0.772	-0.373327	0.05404
Prss3	0.774	-0.369595	0.00100284
Prss3b	0.776	-0.365871	0.0225931
Try10	0.783	-0.352916	0.00216846
Ptpn9	0.783	-0.352916	0.00209353
Nptn	0.792	-0.336428	0.0439943
Arf5	0.812	-0.300448	0.0158292
Sv2b	0.815	-0.295128	0.0188362
Ap3d1	0.823	-0.281036	0.0297332
BC085271	0.832	-0.265345	0.0882186
H1f0	1.2	0.263034	0.0606913
Metap2	1.201	0.264236	0.0559995
Rps16	1.204	0.267835	0.0668597
Rps27a	1.209	0.273814	0.00803163
Gatd3	1.209	0.273814	0.00787532
Tagln3	1.21	0.275007	0.0162921
Ttyh1	1.21	0.275007	0.00759176
Xpo6	1.212	0.27739	0.0639238
Serpina3k	1.214	0.279768	0.0606913
Sod1	1.22	0.286881	0.00480784
Clta	1.22	0.286881	0.0477073
Anxa5	1.222	0.289244	0.0324621
Syn2	1.222	0.289244	0.0330393
Ptms	1.225	0.292782	0.0468542
Vamp2	1.233	0.302173	0.0342666
Rpl10a	1.236	0.305679	0.0193369
Ndufs3	1.237	0.306845	0.0362301
Gm5409	1.239	0.309176	0.0288159
Eloc	1.239	0.309176	0.0882682
Acot13	1.239	0.309176	0.0141017
Tigd2	1.243	0.313826	0.00368381
Ndufa6	1.247	0.318461	0.00403185
Alb	1.256	0.328836	0.0008035
Ttr	1.264	0.337996	0.0089203
Atp6v1g2	1.269	0.343692	0.01262
Ndufs5	1.274	0.349365	0.0437636
H4c1; H4c11; H4c12; H4c14; H4c16; H4c2; H4c3; H4c4; H4c6; H4c8; H4c9; Hist1h4m	1.275	0.350497	0.000293525
Ndufb10	1.277	0.352759	0.00909085
Marcks	1.279	0.355016	0.00344936
Sri	1.287	0.364012	0.00604496
Ndufs6	1.289	0.366252	0.000134942
Cycs	1.295	0.372952	9.68e-05
Septin5	1.296	0.374066	0.0294271
Tecr	1.297	0.375178	0.00681531
Atp5mf	1.297	0.375178	0.02636
Nipsnap2	1.304	0.382944	0.00707782
Rps5	1.307	0.386259	0.0882932
Crtc1	1.308	0.387363	0.0941715
Nipsnap1	1.308	0.387363	0.000249892
Auh	1.311	0.390668	0.00206471
Naip5	1.312	0.391768	0.00825089
Pabpc1	1.321	0.40163	0.0993209
Thada	1.322	0.402722	0.0158037
Atp6v0d1	1.322	0.402722	0.000419623
Syt5	1.326	0.407081	0.00426492
Ampd2	1.329	0.410341	0.0289172
Rpl35	1.335	0.41684	0.00174178
Fxyd6	1.344	0.426533	0.0590925
Nrgn	1.344	0.426533	0.0457537
Glrx3	1.345	0.427606	0.0715964
Clu	1.348	0.43082	0.000747568
Rps18	1.351	0.434028	0.000873013
Calb2	1.369	0.453122	0.0314023
Pdp1	1.378	0.462576	0.0766023
Rpl38	1.393	0.478195	0.0509282
Rps19	1.397	0.482332	0.000246733
Septin7	1.4	0.485427	0.00216624
Hebp1	1.403	0.488515	6.28e-07
Atp6v1d	1.406	0.491597	0.000135998
Ndufb7	1.407	0.492622	0.00115098
Uqcrh	1.415	0.500802	0.00181115
Smu1	1.419	0.504875	0.0455387
Septin10	1.438	0.524064	0.00446848
Ruvbl2	1.438	0.524064	0.0312819
H2ac25	1.439	0.525067	2.93e-06
Rps25	1.443	0.529071	6.16e-09
Ndufb8	1.446	0.532068	0.00935947
Nnt	1.463	0.54893	0.0149591
Scamp2	1.469	0.554834	0.0102024
Fga	1.472	0.557778	0.0121601
Igh	1.479	0.564622	0.00642583
Stmn1	1.491	0.57628	3.17e-06
Cplx2	1.509	0.593593	3.37e-09
Mpc1	1.517	0.601221	0.00107378
Skt	1.528	0.611645	0.00940264
H2ac20	1.533	0.616358	0.0369721
Gpr37l1	1.54	0.62293	0.000553707
Rbbp7	1.586	0.665393	0.010993
Cbr3	1.589	0.668119	7.14e-08
Dip2b	1.59	0.669027	5.37e-05
Ndufa8	1.606	0.683472	8.69e-10
Mbnl1	1.622	0.697774	0.011404
Creld1	1.631	0.705757	0.00134186
Mt3	1.636	0.710173	0.000131806
Id4	1.644	0.71721	8.78e-05
Slc23a2	1.65	0.722466	0.0395616
Epb41l2	1.651	0.72334	0.0468193
Nt5c	1.66	0.731183	0.00287187
Nipa1	1.661	0.732052	0.0190739
Cab39	1.678	0.746743	0.00014964
Vps26a	1.681	0.74932	0.000658762
Lamp1	1.689	0.756169	2.58e-05
Acsf3	1.714	0.777367	0.0937811
Thsd7a	1.729	0.789938	0.00770892
Lin7b	1.743	0.801573	0.0142063
Exoc3	1.744	0.8024	0.0121601
Ndufb9	1.779	0.831067	8.9e-12
Letmd1	1.785	0.835924	0.00471739
Pklr	1.794	0.84318	0.0133087
Igkc	1.809	0.855192	5.56e-05
Epn2	1.921	0.941858	4.15e-06
Hnrnpk	1.94	0.956057	4.45e-08
Smarcc1	1.982	0.986957	3.07e-05
Eef1d	1.984	0.988412	1.5e-05
Fgg	2.062	1.04404	0.000258657
Cacna2d2	2.076	1.05381	9.64e-08
Tubb3	2.076	1.05381	8.01e-08
Csnk1d	2.138	1.09626	1.38e-10
Cdc42bpa	2.147	1.10232	0.00111504
Shd	2.155	1.10769	2.88e-14
Cpt2	2.161	1.1117	3.94e-05
Snap25	2.206	1.14143	2.87e-05
Ndrg2	2.21	1.14405	5.54e-12
Kcnn2	2.282	1.1903	0.00647609
Rnf126	2.333	1.22219	0.0161862
Sh2b1	2.354	1.23511	0.000102503
Ndufv3	2.556	1.35389	2.06e-06
Ndufv3	2.897	1.53456	5.52e-08
Stxbp6	2.969	1.56998	3.14e-05
Dkc1	3.701	1.88792	2.21e-16
Rap1a	3.809	1.92941	5.5e-13
Hcfc1	6.393	2.67649	2.21e-16
Mblac2	7.446	2.89647	2.21e-16
2410002F23Rik	100	6.64386	2.21e-16
Rasa3	100	6.64386	2.21e-16
Stom	100	6.64386	2.21e-16
Phldb1	100	6.64386	2.21e-16
Scn3a	100	6.64386	2.21e-16
Hid1	100	6.64386	2.21e-16
Nrp1	100	6.64386	2.21e-16
Cfap36	100	6.64386	2.21e-16
Ap3s2	100	6.64386	2.21e-16
Dmwd	100	6.64386	2.21e-16
Ipo13	100	6.64386	2.21e-16
Col4a6	100	6.64386	2.21e-16
Fam120c	100	6.64386	2.21e-16
Nprl2	100	6.64386	2.21e-16
Rab11fip2	100	6.64386	2.21e-16
Tjp1	100	6.64386	2.21e-16
Slc18a2	100	6.64386	2.21e-16
Atg4c	100	6.64386	2.21e-16
Guk1	100	6.64386	2.21e-16
RTRAF	100	6.64386	2.21e-16
Gpcpd1	100	6.64386	2.21e-16
Sh2d5	100	6.64386	2.21e-16
Mien1	100	6.64386	2.21e-16
Themis2	100	6.64386	2.21e-16
Map4	100	6.64386	2.21e-16

## Sheet: CTX PTE- v SHAM
Gene_Symbol	Abundance Ratio: (ctx, pte plus) / (ctx, pte minus)	Log2FC	padj
Anapc1	0.01	-6.64386	3.3e-16
Cpne2	0.01	-6.64386	3.3e-16
Daam2	0.01	-6.64386	3.3e-16
Dcun1d3	0.01	-6.64386	3.3e-16
Eif2a	0.01	-6.64386	3.3e-16
Gabra5	0.01	-6.64386	3.3e-16
Kcnj9	0.01	-6.64386	3.3e-16
Kti12	0.01	-6.64386	3.3e-16
Phldb1	0.01	-6.64386	3.3e-16
Ppfia4	0.01	-6.64386	3.3e-16
Rab3c	0.01	-6.64386	3.3e-16
Sec23b	0.01	-6.64386	3.3e-16
Senp8	0.01	-6.64386	3.3e-16
Sh2b1	0.01	-6.64386	3.3e-16
Shank2	0.01	-6.64386	3.3e-16
Spast	0.01	-6.64386	3.3e-16
Ubash3b	0.01	-6.64386	3.3e-16
Acbd6	0.092	-3.44222	3.3e-16
Isca2	0.247	-2.01742	9.8e-13
Slc4a7	0.251	-1.99424	1.56e-10
Mblac2	0.261	-1.93788	3.3e-16
Elmo2	0.33	-1.59946	9.38e-12
Chmp6	0.333	-1.58641	3.3e-16
Grpel1	0.347	-1.52699	1.08e-08
Itpr3	0.354	-1.49818	8.73e-08
Sap18b	0.361	-1.46993	0.00016088
Kif20b	0.366	-1.45008	1.07e-10
Tenm2	0.389	-1.36216	2.13e-06
Rrbp1	0.392	-1.35107	0.00131954
Sbf2	0.421	-1.24811	0.00644059
Rpl37	0.431	-1.21424	0.00377237
Mtx3	0.444	-1.17137	4.21e-05
Krt28	0.445	-1.16812	0.000883695
Tubb1	0.447	-1.16165	0.00510041
Selenot	0.448	-1.15843	0.000101675
Prmt8	0.461	-1.11716	2.41e-08
Nhsl2	0.476	-1.07097	0.0152809
Dcdc2a	0.503	-0.99137	0.000530056
Lrrc40	0.506	-0.982791	0.0162951
Cp	0.515	-0.957356	0.00995711
H2ac20	0.524	-0.932361	1.54e-07
Bbs1	0.531	-0.913216	0.0811618
Apc	0.537	-0.897006	0.0875201
Rnf20	0.539	-0.891643	0.0354706
Rabggtb	0.545	-0.875672	0.000263046
Hk2	0.547	-0.870387	0.000159228
Tm9sf3	0.549	-0.865122	0.00620917
Grid1	0.55	-0.862496	0.0424688
Ilvbl	0.556	-0.846843	0.0582752
Neb	0.564	-0.826233	0.0665691
Vldlr	0.569	-0.813499	0.0927598
D630045J12Rik	0.574	-0.800877	0.00592085
Clptm1l	0.576	-0.795859	0.0504542
Gfra1	0.576	-0.795859	0.0741896
Fbll1	0.598	-0.741783	0.0149754
Spryd4	0.598	-0.741783	0.0271144
Tmem132b	0.602	-0.732165	0.0294359
Tgfb1i1	0.612	-0.708396	0.0411107
Acly	0.618	-0.694321	4.95e-08
Scai	0.618	-0.694321	0.00659289
Cryl1	0.62	-0.68966	0.0458272
Psd	0.623	-0.682696	2.38e-06
Agfg1	0.635	-0.655172	2.62e-09
Thada	0.643	-0.637109	1.67e-06
Pde4b	0.65	-0.621488	0.000710836
Acss1	0.651	-0.619271	0.0917695
H2ax	0.652	-0.617056	3.3e-16
Zbed5	0.654	-0.612637	0.004065
Epn2	0.657	-0.606035	0.0236022
Prxl2b	0.662	-0.595097	0.0988915
Atp1a4	0.69	-0.535332	0.0701977
Cldn11	0.695	-0.524915	6.18e-08
Slc44a2	0.704	-0.506353	0.0703762
Pgk2	0.711	-0.492079	0.000849471
Tcea1	0.712	-0.490051	0.019931
Axin1	0.717	-0.479955	0.00781382
Rab12	0.718	-0.477944	0.0209461
Dnm1l	0.72	-0.473931	0.0250681
Fam169a	0.734	-0.446148	0.0090026
KRT10	0.738	-0.438307	9.46e-08
Hnrnpk	0.742	-0.430509	0.00945795
H2ac25	0.746	-0.422752	4.22e-06
Tigd2	0.747	-0.42082	5.3e-07
Rab6a	0.75	-0.415037	0.0461149
Cfb	0.753	-0.409278	0.0659501
Arl8a	0.757	-0.401635	0.0582752
Slc7a14	0.76	-0.395929	0.0127618
Acsl3	0.763	-0.390245	0.0976781
Hcfc1	0.772	-0.373327	0.0329353
Tecr	0.781	-0.356606	0.00523318
H2bc3	0.783	-0.352916	6.26e-06
H4c1; H4c11; H4c12; H4c14; H4c16; H4c2; H4c3; H4c4; H4c6; H4c8; H4c9; Hist1h4m	0.788	-0.343732	1.17e-05
Caprin1	0.789	-0.341903	0.0111787
Sorbs2	0.792	-0.336428	0.0293507
Eno3	0.795	-0.330973	0.0189928
Rpl38	0.8	-0.321928	0.0265114
Hsd17b8	0.805	-0.312939	0.0947814
Arf3	0.811	-0.302226	0.000210275
Tbc1d24	0.815	-0.295128	0.041031
Naip5	0.817	-0.291592	0.0481077
Psd3	0.817	-0.291592	0.00239363
Prkcg	0.818	-0.289827	0.000466725
H1f0	0.821	-0.284546	0.0301796
Aldoart1	0.825	-0.277534	0.0656825
Gsr	0.826	-0.275786	0.020879
H1-4	0.827	-0.274041	0.0225096
KRT2	0.83	-0.268817	0.0111787
Septin10	0.831	-0.26708	0.0722527
Atp5pd	1.203	0.266637	0.0030735
Stmn1	1.205	0.269033	0.000589759
HBA1; HBA2	1.206	0.27023	0.000559877
Ndufb10	1.207	0.271426	0.00842276
Cox5a	1.211	0.276199	0.00101686
Mtpn	1.212	0.27739	0.0588921
Ncald	1.212	0.27739	0.00481411
Mgst3	1.214	0.279768	0.0117039
Rps10	1.214	0.279768	0.0605217
Bicd1	1.22	0.286881	0.049721
Csl	1.22	0.286881	0.0458295
Ppp3r1	1.22	0.286881	0.000194746
Cst3	1.223	0.290424	0.0703762
Sh3glb2	1.226	0.293959	0.00352545
Nipsnap1	1.229	0.297485	0.000154436
Hpca	1.23	0.298658	8.49e-05
Napb	1.23	0.298658	8.7e-05
Vamp2	1.231	0.299831	0.00194052
Cox6a1	1.232	0.301002	7.25e-05
Arpc3	1.234	0.303342	0.0343627
Anxa5	1.236	0.305679	0.00196808
Atp5f1e	1.239	0.309176	0.0064999
Efhd2	1.239	0.309176	0.000737789
Vsnl1	1.241	0.311503	3.72e-05
Gstm5	1.244	0.314986	0.0020267
Ptpn23	1.244	0.314986	0.0856487
Rpl26	1.245	0.316146	0.0262536
Cox4i1	1.248	0.319618	2.05e-05
Ndufs3	1.25	0.321928	0.0021484
Blvrb	1.251	0.323082	0.091621
Hpcal4	1.251	0.323082	0.000126024
Atp5mpl	1.254	0.326537	0.00802128
Mapt	1.254	0.326537	0.0395456
Hpcal1	1.261	0.334568	0.0221033
Ensa	1.265	0.339137	0.00875739
Hbb-bs	1.266	0.340277	4.32e-06
Atp4a	1.268	0.342555	0.0306393
Ociad2	1.281	0.35727	0.0649285
Ywhae	1.283	0.359521	9.86e-07
Calb1	1.284	0.360645	0.00788374
Rps12	1.287	0.364012	0.000630661
Nrgn	1.288	0.365133	0.012368
Calb2	1.291	0.368489	0.00105167
Atp6v1d	1.292	0.369606	6.99e-06
Cyria	1.295	0.372952	0.00420179
Napa	1.297	0.375178	0.00886758
Nnt	1.303	0.381837	0.0490127
Ywhah	1.307	0.386259	1.01e-07
Slain1	1.308	0.387363	1.5e-07
Cep170b	1.309	0.388465	0.0460214
Echs1	1.309	0.388465	0.000115056
Fkbp15	1.316	0.396159	0.0443661
Ywhag	1.316	0.396159	4.17e-08
Lynx1	1.318	0.39835	0.0296195
Shd	1.326	0.407081	0.000275394
Slc22a1	1.328	0.409255	0.00016669
Eif1ax	1.335	0.41684	0.030849
Atp5mf	1.337	0.418999	3.64e-06
Septin7	1.337	0.418999	0.000113646
Tpm3	1.339	0.421156	4.32e-09
Arl6ip5	1.343	0.425459	0.0100643
Pgam1	1.343	0.425459	2.74e-09
Tmod2	1.346	0.428678	0.000177793
S100a1	1.347	0.42975	0.0201657
Cisd1	1.349	0.43189	4.81e-06
Crnkl1	1.351	0.434028	1.27e-09
Auh	1.352	0.435095	1.36e-05
Fga	1.355	0.438293	0.0481149
Ndufab1	1.355	0.438293	0.0121179
Hebp1	1.357	0.440421	4.03e-06
Ndufb5	1.367	0.451013	3.64e-05
Calm2	1.369	0.453122	1.71e-10
Ftl1	1.37	0.454176	0.0358755
Tmem126a	1.372	0.45628	0.0124965
Ywhab	1.372	0.45628	1.37e-10
Ndufb8	1.379	0.463622	3.41e-06
Scp2	1.38	0.464668	0.00878689
Apoe	1.385	0.469886	6.6e-06
Atp5mg	1.391	0.476122	0.00100688
Tubal3	1.391	0.476122	9.25e-05
Tomm20	1.392	0.477159	0.0402214
Tmpo	1.394	0.479231	0.0216243
Fgb	1.395	0.480265	0.0246643
Ampd2	1.401	0.486457	0.00443158
Gnai3	1.404	0.489543	0.0303658
Fmnl1	1.406	0.491597	0.00299271
Vps16	1.426	0.511974	0.0592067
Mcts1	1.461	0.546956	0.0209186
Igkc	1.464	0.549916	0.0508918
Cdc42se2	1.475	0.560715	0.0117611
Gpr37l1	1.479	0.564622	0.000262516
Cd47	1.505	0.589763	0.000282318
Tpm1	1.517	0.601221	2.24e-12
Dagla	1.528	0.611645	0.0172301
Rbbp7	1.533	0.616358	0.00914199
Thrap3	1.537	0.620117	0.00101339
Ndufb1	1.547	0.629473	0.0958132
Guk1	1.567	0.648005	0.0136346
Cox6c	1.572	0.652601	7.11e-05
Slc6a7	1.572	0.652601	0.0340249
Pea15	1.581	0.660837	5.52e-05
Wdr48	1.597	0.675364	0.0662244
Dbi	1.603	0.680774	1.42e-06
Ces1c	1.606	0.683472	0.0947814
Pcbp2	1.62	0.695994	0.0862137
Atp5pf	1.625	0.70044	2.35e-12
Abca7	1.635	0.709291	0.0708525
Tmsb4x	1.639	0.712816	5.62e-09
Stxbp1	1.656	0.727703	0.00732083
Uqcrb	1.68	0.748461	3.3e-16
Pten	1.698	0.763836	3e-08
Tia1	1.704	0.768925	0.0240813
Ndufv3	1.725	0.786596	0.00528796
Rtn4	1.744	0.8024	0.00621796
Atad1	1.759	0.814755	0.0262536
HC	1.765	0.819668	0.0128984
Pak5	1.772	0.825379	0.0236022
Sart1	1.78	0.831877	3.7e-07
S100b	1.798	0.846393	1.33e-08
Syt5	1.805	0.851999	1.16e-10
Slc1a2	1.812	0.857583	0.00346335
Ndufb6	1.825	0.867896	1.56e-07
KRT14	1.848	0.885965	5.1e-09
Tomm22	1.858	0.893751	2.86e-09
Bckdk	1.889	0.917623	0.0887593
Ppp2r1b	1.926	0.945608	0.00543486
Ptpn5	1.931	0.949348	0.0539146
Commd9	1.978	0.984042	0.00259587
ATP6	1.996	0.997112	3.05e-10
Cdc42bpa	2.025	1.01792	0.00813754
Atp5k	2.044	1.0314	3.3e-16
Chrm1	2.061	1.04334	0.000229052
Chp1	2.075	1.05311	0.000295193
Erh	2.091	1.06419	5.7e-10
Dpp10	2.151	1.10501	0.0118387
Tmed4	2.175	1.12102	0.0748919
Miga2	2.316	1.21164	0.0120397
Atp2b2	2.353	1.2345	1.63e-09
Crtac1	2.373	1.24671	0.0108965
Spata2l	2.42	1.27501	0.0102944
Ncoa6	2.447	1.29101	0.000313096
Sarnp	2.462	1.29983	2.9e-06
Stx17	2.475	1.30743	0.0227132
Homer3	2.505	1.32481	1.25e-05
Atp5mc1	2.506	1.32539	1.41e-05
Cul9	2.516	1.33113	0.0209186
Ndc1	2.586	1.37072	0.00725899
S100a6	2.606	1.38184	0.0123825
Elfn2	2.618	1.38847	0.00116531
Gan	2.652	1.40708	1.94e-07
Ankh	3.021	1.59503	0.000189472
Nemf	3.208	1.68167	1.71e-09
Cyp51a1	3.305	1.72465	0.000405263
Trappc13	3.778	1.91762	2.34e-06
Fam210a	4.352	2.12168	2.37e-07
Armt1	4.459	2.15672	2.4e-07
Tbc1d15	6.16	2.62293	6.29e-12
Lamp1	6.509	2.70244	3.3e-16
Fxyd1	10.068	3.33171	3.3e-16
Anxa1	100	6.64386	3.3e-16
Atp12a	100	6.64386	3.3e-16
Celf2	100	6.64386	3.3e-16
Daglb	100	6.64386	3.3e-16
Eef1d	100	6.64386	3.3e-16
Limd2	100	6.64386	3.3e-16
Niban2	100	6.64386	3.3e-16
Pcp4l1	100	6.64386	3.3e-16
Rasgrp1	100	6.64386	3.3e-16
Sfxn4	100	6.64386	3.3e-16
Trnt1	100	6.64386	3.3e-16
Vps25	100	6.64386	3.3e-16
Washc4	100	6.64386	3.3e-16
Wdr20rt	100	6.64386	3.3e-16

## Sheet: HPC PTE+ v SHAM
Gene_Symbol	Abundance Ratio: (ctx, pte plus) / (ctx, pte minus)	Log2FC	padj
Tbc1d8b	0.01	-6.64386	2.24e-16
Eva1a	0.01	-6.64386	2.24e-16
Anapc1	0.01	-6.64386	2.24e-16
Apc	0.01	-6.64386	2.24e-16
Klc2	0.01	-6.64386	2.24e-16
Acsl5	0.01	-6.64386	2.24e-16
Wdr11	0.01	-6.64386	2.24e-16
Cxnp1	0.01	-6.64386	2.24e-16
Tmem68	0.01	-6.64386	2.24e-16
Itpr2	0.01	-6.64386	2.24e-16
Matk	0.01	-6.64386	2.24e-16
Git2	0.01	-6.64386	2.24e-16
Fxyd1	0.093	-3.42663	2.24e-16
Sema4a	0.101	-3.30757	2.24e-16
Kng1	0.184	-2.44222	1.46e-11
Chmp6	0.249	-2.00578	2.24e-16
TIAM2	0.283	-1.82113	2.24e-16
Rab15	0.331	-1.5951	8.16e-07
Zfp91	0.358	-1.48197	2.24e-16
KRT14	0.359	-1.47794	2.24e-16
Eif2b5	0.385	-1.37707	1.75e-08
Dsp	0.387	-1.36959	8.95e-07
Hnrnpul1	0.393	-1.3474	7.9e-06
Arhgap12	0.398	-1.32916	8.75e-09
Krt90	0.402	-1.31473	2.24e-16
Nup54	0.408	-1.29336	4.43e-05
Zc3hc1	0.449	-1.15521	0.00911646
Gclc	0.462	-1.11404	1.08e-09
KRT17	0.468	-1.09542	0.000142671
KRT1	0.486	-1.04097	2.24e-16
Jakmip3	0.495	-1.0145	0.0194428
Senp8	0.497	-1.00868	0.0185895
Ndufb4	0.5	-1	2.89e-08
Gcat	0.501	-0.997117	0.00308173
Cd47	0.504	-0.988504	1.97e-14
Ppp1r12c	0.508	-0.9771	0.0133766
Pakap	0.516	-0.954557	0.005094
Dctn6	0.526	-0.926865	1.09e-06
Tmed4	0.529	-0.91866	0.0577848
Ahnak	0.529	-0.91866	0.0014797
Cpeb2	0.535	-0.902389	0.000181264
Ilvbl	0.542	-0.883635	0.0131059
KRT6A	0.555	-0.84944	2.24e-16
Fam169a	0.563	-0.828793	2.92e-08
HRNR	0.57	-0.810966	0.096238
KRT16	0.572	-0.805913	2.24e-16
KRT10	0.573	-0.803393	2.24e-16
Washc2	0.589	-0.76366	0.000121007
Akt2	0.589	-0.76366	0.0357923
Rrbp1	0.596	-0.746616	0.0461911
Ddi2	0.599	-0.739372	0.0250809
Hdgfl2	0.6	-0.736966	0.00416599
Aoc3	0.602	-0.732165	0.0544106
Uap1l1	0.61	-0.713119	0.0869963
Pin1rt1	0.615	-0.701342	0.000224861
Arhgef6	0.629	-0.668868	0.0488387
Septin5	0.631	-0.664288	0.00911646
Rab11fip5	0.634	-0.657445	0.0225709
Ak9	0.637	-0.650635	3.63e-05
Tgfb1i1	0.639	-0.646112	0.0185268
Ech1	0.641	-0.641604	0.0248777
Cryl1	0.646	-0.630394	0.0258135
KRT9	0.656	-0.608232	1.61e-11
Mpp1	0.656	-0.608232	0.0407492
Tmx1	0.668	-0.58208	0.0243359
Prss3b	0.669	-0.579922	2.37e-06
KRT5	0.671	-0.575615	4.35e-05
Cfb	0.675	-0.567041	0.00255414
Dcdc2a	0.676	-0.564905	0.0499315
Hsdl1	0.688	-0.53952	0.0848518
Igha	0.69	-0.535332	0.0083516
Atat1	0.69	-0.535332	0.0903934
Clint1	0.69	-0.535332	0.000460378
Cpm	0.693	-0.529073	0.0178684
Emb	0.703	-0.508403	0.00854247
Spast	0.704	-0.506353	0.00286117
Cacng3	0.707	-0.500218	0.00812952
Kifbp	0.713	-0.488026	0.0220535
Atp5mg	0.714	-0.486004	0.00454277
Jam3	0.721	-0.471929	0.0135006
Sav1	0.721	-0.471929	0.0185268
Serpina1b	0.722	-0.469929	0.0173245
Cat	0.724	-0.465938	0.0223569
Smim1	0.731	-0.452057	0.0480056
Tpm3	0.731	-0.452057	0.0831536
Alyref	0.735	-0.444184	0.00389868
Tubb2b	0.738	-0.438307	2.35e-05
Dnajb11	0.738	-0.438307	0.028222
Syt5	0.747	-0.42082	0.00635147
Sart1	0.753	-0.409278	0.0419237
KRT2	0.756	-0.403542	3.08e-05
Surf4	0.756	-0.403542	0.024866
Crbn	0.758	-0.39973	0.0901318
Tceal5	0.76	-0.395929	0.0115448
Gng4	0.762	-0.392137	0.00911004
ATP6	0.766	-0.384584	0.0434947
Eipr1	0.767	-0.382702	0.0788909
Tuft1	0.768	-0.380822	0.0625306
Aspa	0.768	-0.380822	0.014287
Tubal3	0.771	-0.375197	0.00909413
Cbx3	0.771	-0.375197	0.0291144
App	0.774	-0.369595	0.00769711
Mlec	0.777	-0.364013	0.0838858
Enpp6	0.779	-0.360305	0.0235851
Atp4a	0.78	-0.358454	0.0285165
Mcu	0.78	-0.358454	0.0147653
Wdfy1	0.792	-0.336428	0.0673561
Cd9	0.792	-0.336428	0.0156767
Rbbp4	0.803	-0.316528	0.0623989
Serpina3k	0.803	-0.316528	0.0528124
Cox5b	0.805	-0.312939	0.0676675
Fkbp3	0.807	-0.309359	0.0813009
Pzp	0.81	-0.304006	0.00469768
Epb41l2	0.816	-0.293359	0.0983779
Napg	1.201	0.264236	0.0374424
Hspd1	1.201	0.264236	0.0375748
Ndufs6	1.21	0.275007	0.0258365
Sod2	1.213	0.27858	0.0236962
Cox4i1	1.218	0.284514	0.0192731
Gstm1	1.219	0.285698	0.0187359
Prdx3	1.22	0.286881	0.017891
Hpca	1.221	0.288063	0.0175368
Auh	1.228	0.296311	0.0886802
Vim	1.231	0.299831	0.0114943
Sh3bgrl	1.234	0.303342	0.0972782
Arpc4	1.236	0.305679	0.0423293
H2bc3	1.24	0.31034	0.00769711
Sri	1.247	0.318461	0.075014
Tpm1	1.251	0.323082	0.0891453
Tpm3	1.253	0.325386	0.0256829
Myl6	1.254	0.326537	0.0544106
Rpl10a	1.255	0.327687	0.0255558
Ywhab	1.255	0.327687	0.0103125
HBA	1.256	0.328836	0.00380679
Cldn11	1.26	0.333424	0.0200845
Akr1b3	1.261	0.334568	0.050789
Etfb	1.261	0.334568	0.0409486
HBA1; HBA2	1.263	0.336855	0.00270005
Rps16	1.265	0.339137	0.0324296
Apoo	1.27	0.344828	0.00209705
Ywhah	1.273	0.348232	0.00175654
Ndufa6	1.275	0.350497	0.00544777
Hdhd2	1.278	0.353888	0.0544584
Ndufs8	1.279	0.355016	0.00356143
Ethe1	1.28	0.356144	0.0750792
Cbr3	1.281	0.35727	0.0239387
Cisd1	1.282	0.358396	0.0409439
Uchl1	1.285	0.361768	0.000869706
Tagln3	1.285	0.361768	0.00186415
Calm2	1.289	0.366252	0.000723407
Ndufb7	1.3	0.378512	0.0271405
Mtco2	1.302	0.380729	0.010637
Tprg1l	1.302	0.380729	0.023334
Cox5a	1.302	0.380729	0.00986607
Arpc5	1.303	0.381837	0.0400214
H1f0	1.309	0.388465	0.00853581
Nrgn	1.31	0.389567	0.0760832
Ruvbl1	1.312	0.391768	0.0673561
Gstp1	1.313	0.392867	0.000198964
Armc1	1.315	0.395063	0.0290525
Cyria	1.321	0.40163	0.024866
Stmn1	1.322	0.402722	0.00940898
Ndufs3	1.324	0.404903	0.00433597
Pcmt1	1.327	0.408168	0.00504263
Ndufb10	1.333	0.414677	0.00588946
Ywhae	1.334	0.415759	6.29e-05
Nif3l1	1.341	0.423309	0.0407492
Mtx2	1.356	0.439357	0.0126893
Clta	1.357	0.440421	0.00274072
Map1lc3a	1.359	0.442545	0.00150191
Uchl3	1.36	0.443607	0.00783902
Ndufs5	1.36	0.443607	0.00700123
Arl8b	1.361	0.444667	0.000665413
H2ax	1.363	0.446786	1.08e-05
Rps19	1.363	0.446786	0.00242409
Echs1	1.365	0.448901	0.00190314
Nipsnap1	1.374	0.458382	2.48e-05
Rps18	1.375	0.459432	0.000681747
Pcp4	1.381	0.465713	0.0015759
Wipi2	1.384	0.468844	0.0313614
Msn	1.395	0.480265	0.00958449
Slc38a3	1.398	0.483364	0.0790495
Eif3f	1.4	0.485427	0.00715242
Nipsnap2	1.402	0.487486	0.00167545
Atp5f1e	1.404	0.489543	0.00115271
Hbb-bs	1.407	0.492622	6.99e-07
H4c1; H4c11; H4c12; H4c14; H4c16; H4c2; H4c3; H4c4; H4c6; H4c8; H4c9; Hist1h4m	1.424	0.509949	2.14e-07
Hba-a1	1.425	0.510962	1.98e-07
Ppp2r2d	1.43	0.516015	0.0808372
Cycs	1.436	0.522056	9.92e-08
Cplx2	1.441	0.52707	5.52e-07
Chchd3	1.445	0.531069	0.00045268
Rps5	1.447	0.533065	0.00170183
Ndufb8	1.456	0.54201	0.00134733
Anxa5	1.461	0.546956	2.81e-05
Mt3	1.466	0.551885	0.00924982
Plcxd3	1.473	0.558757	0.0138458
H1f3	1.476	0.561693	0.00164361
H2ac25	1.501	0.585924	1.7e-07
Ppp2r5b	1.502	0.586885	0.0578684
Rabggtb	1.505	0.589763	0.0605071
Csnk1d	1.506	0.590722	0.000447442
H3c13; H3c14; H3c15; H3c2; H3c3; H3c4; H3c6; H3c7	1.516	0.60027	3.15e-10
Tor1aip1	1.521	0.60502	0.072869
Atp6v1d	1.524	0.607863	2.48e-06
Ociad2	1.528	0.611645	0.000417254
Ncs1	1.529	0.612588	0.0105538
Hebp1	1.536	0.619178	7.15e-11
Napa	1.541	0.623867	0.00866869
Ptms	1.542	0.624803	4.59e-06
Bclaf1	1.542	0.624803	0.060373
Gps1	1.557	0.638769	0.00482175
Nans	1.57	0.650765	0.0527635
Pten	1.581	0.660837	0.000417254
Pabpc1	1.588	0.667211	0.000873926
Sumo1	1.593	0.671746	0.0721268
Ankmy2	1.598	0.676267	0.0613406
Ndufa8	1.601	0.678973	5.61e-08
Cox6a1	1.619	0.695103	1.27e-10
Cab39	1.62	0.695994	0.000178658
Sdhd	1.628	0.703101	0.000123043
Ndufb9	1.629	0.703987	6.4e-08
Atp6v0d1	1.633	0.707525	1.98e-12
Pea15	1.637	0.711054	0.0126893
Blvrb	1.64	0.713696	0.000119301
Cd44	1.641	0.714575	0.0200384
Ryr2	1.648	0.720716	0.000574557
Timm29	1.662	0.73292	0.0147653
Selenot	1.709	0.773152	0.0332945
Praf2	1.711	0.77484	0.000132216
Cygb	1.732	0.792439	0.0696054
Gpr37l1	1.782	0.833497	7.19e-07
Lrrfip1	1.789	0.839153	0.0285359
Vamp1	1.796	0.844787	0.00107997
S100a4	1.801	0.848798	0.0925225
Cacna2d2	1.805	0.851999	5.32e-06
Limd2	1.817	0.861558	0.00602465
Ldhd	1.865	0.899176	0.0734708
Nt5c	1.869	0.902267	0.000443744
Pds5b	1.885	0.914565	0.0704292
Vps26a	1.89	0.918386	8.63e-06
Mpc1	1.908	0.932061	0.0393324
Exoc3	1.932	0.950095	0.00265304
Herc1	1.934	0.951588	0.0869036
Cert1	1.969	0.977463	0.0876437
Thsd7a	1.978	0.984042	0.000251805
Aldoart1	1.998	0.998557	2.24e-16
Ndc1	2.017	1.01221	0.0721133
Coq6	2.03	1.02148	8.16e-09
Gcdh	2.033	1.02361	7.96e-05
S100a6	2.039	1.02786	0.0625711
Ppp1r14a	2.046	1.03281	0.00754001
Abhd17b	2.079	1.05589	0.0182743
Myh11	2.111	1.07793	4.05e-06
Chat	2.123	1.0861	0.00292479
Snap25	2.123	1.0861	1.2e-05
Hcfc1	2.134	1.09356	2.24e-16
Fgg	2.143	1.09963	3.2e-06
Arvcf	2.144	1.1003	0.00401917
Stxbp6	2.144	1.1003	0.00350459
Fis1	2.236	1.16092	0.000136916
Mrps30	2.237	1.16157	0.0220516
Isoc2a	2.246	1.16736	0.00015076
Vbp1	2.279	1.1884	0.0125901
Retreg3	2.334	1.2228	0.0176933
Nnt	2.399	1.26243	2.24e-16
Ndrg2	2.41	1.26903	2.24e-16
Scyl1	2.542	1.34596	8.4e-05
Mapre1	2.723	1.4452	1.42e-10
Ndufv3	3.056	1.61164	3.83e-10
Dkc1	3.182	1.66993	6.87e-14
Wdr4	4.076	2.02715	2.24e-16
Mblac2	5.349	2.41927	2.24e-16
Armt1	6.613	2.7253	6.58e-13
Pdpr	100	6.64386	2.24e-16
Fbll1	100	6.64386	2.24e-16
Ptbp3	100	6.64386	2.24e-16
Abca2	100	6.64386	2.24e-16
Ankrd63	100	6.64386	2.24e-16
Atp5o	100	6.64386	2.24e-16
Ndufa5	100	6.64386	2.24e-16
Ap3s2	100	6.64386	2.24e-16
Dmwd	100	6.64386	2.24e-16
Chmp2b	100	6.64386	2.24e-16
Ipo13	100	6.64386	2.24e-16
Col4a6	100	6.64386	2.24e-16
Fam120c	100	6.64386	2.24e-16
Nprl2	100	6.64386	2.24e-16
Rab11fip2	100	6.64386	2.24e-16
Micos10	100	6.64386	2.24e-16
Tjp1	100	6.64386	2.24e-16
Slc18a2	100	6.64386	2.24e-16
Atg4c	100	6.64386	2.24e-16
Arhgdib	100	6.64386	2.24e-16
Fdxr	100	6.64386	2.24e-16
Guk1	100	6.64386	2.24e-16
Ctbp2	100	6.64386	2.24e-16
Ikbkb	100	6.64386	2.24e-16
RTRAF	100	6.64386	2.24e-16
Samhd1	100	6.64386	2.24e-16
Gipc1	100	6.64386	2.24e-16
Chp1	100	6.64386	2.24e-16
Gpcpd1	100	6.64386	2.24e-16
Sh2d5	100	6.64386	2.24e-16
Map4	100	6.64386	2.24e-16

## Sheet: CTX PTE+ v SHAM
Gene_Symbol	Abundance Ratio: (ctx, pte plus) / (ctx, pte minus)	Log2FC	padj
Apc	0.01	-6.64386	2.93e-16
Atp2b2	0.01	-6.64386	2.93e-16
Cpox	0.01	-6.64386	2.93e-16
Ctps1	0.01	-6.64386	2.93e-16
Daam2	0.01	-6.64386	2.93e-16
Krt18	0.01	-6.64386	2.93e-16
Lman2	0.01	-6.64386	2.93e-16
Lpcat4	0.01	-6.64386	2.93e-16
Neb	0.01	-6.64386	2.93e-16
Pdpr	0.01	-6.64386	2.93e-16
Ppfia4	0.01	-6.64386	2.93e-16
Rab3c	0.01	-6.64386	2.93e-16
Spryd4	0.01	-6.64386	2.93e-16
Ubash3b	0.01	-6.64386	2.93e-16
Washc1	0.01	-6.64386	2.93e-16
Zng1	0.01	-6.64386	2.93e-16
Hcfc1	0.139	-2.84684	2.93e-16
Mblac2	0.144	-2.79586	2.93e-16
Isca2	0.201	-2.31473	2.93e-16
Scn1b	0.301	-1.73216	0.000488358
Tomm40l	0.306	-1.7084	1.88e-13
Rap1a	0.341	-1.55216	4.46e-12
Ttbk1	0.347	-1.52699	0.00542755
2410002F23Rik	0.38	-1.39593	7.35e-05
Sec31b	0.383	-1.38458	5.44e-09
Phldb1	0.39	-1.35845	0.0265244
Cpne7	0.397	-1.33279	2.44e-08
TIAM2	0.41	-1.2863	2.93e-16
Dlg3	0.417	-1.26188	0.0531554
Rpl37	0.443	-1.17462	0.0195639
Plekhg6	0.456	-1.13289	0.000130138
Rabggtb	0.476	-1.07097	3.24e-06
S100a9	0.481	-1.05589	0.000387761
Hk2	0.494	-1.01742	1.2e-05
Rnf126	0.507	-0.979942	0.0718394
Vcpip1	0.509	-0.974262	0.00222086
Tenm2	0.51	-0.971431	0.00243502
H2ac20	0.525	-0.929611	3.45e-05
Krt90	0.527	-0.924125	1.34e-10
Krt28	0.53	-0.915936	0.0149096
Arih1	0.537	-0.897006	0.000729793
Chmp6	0.548	-0.867752	4.3e-07
Rbm8a	0.553	-0.854649	0.0904199
KRT10	0.561	-0.833927	2.93e-16
Creld1	0.578	-0.790859	0.00155495
KRT1	0.594	-0.751465	6.33e-14
Tecr	0.598	-0.741783	3.63e-07
Immt	0.604	-0.72738	0.00840244
Id4	0.609	-0.715486	1.91e-06
Slc43a2	0.61	-0.713119	0.0531886
H2bu2	0.613	-0.706041	0.0108177
Ckmt2	0.619	-0.691989	0.0531726
Esyt2	0.619	-0.691989	0.0711533
Trappc10	0.625	-0.678072	0.0806607
Ndrg2	0.634	-0.657445	0.00117395
Igha	0.635	-0.655172	0.00873358
Araf	0.642	-0.639355	0.000607166
KRT2	0.642	-0.639355	6.71e-08
Thada	0.643	-0.637109	7.66e-05
Cenpv	0.649	-0.62371	0.00266355
Ank2	0.655	-0.610433	0.0274959
H2ac25	0.659	-0.60165	1.98e-07
Pakap	0.662	-0.595097	0.0710815
Rpl38	0.686	-0.54372	0.00146428
Fxyd6	0.695	-0.524915	0.000888877
Shd	0.715	-0.483985	0.00304303
Mark2	0.719	-0.475936	0.0688871
Fabp7	0.721	-0.471929	0.0110222
Csnk1d	0.727	-0.459973	0.0113968
Scamp2	0.734	-0.446148	0.0971932
Rpl39	0.75	-0.415037	0.0502412
H2ax	0.752	-0.411195	0.000325702
Hmgcs1	0.753	-0.409278	0.0117147
Psip1	0.766	-0.384584	0.0544279
Aldoart1	0.767	-0.382702	0.0323924
Gm5409	0.768	-0.380822	0.0257336
KRT9	0.768	-0.380822	0.00221169
Acly	0.781	-0.356606	0.0531726
KRT77	0.782	-0.354759	0.0127294
Sorbs2	0.782	-0.354759	0.0786224
Tigd2	0.784	-0.351074	0.00760534
Psd	0.787	-0.345564	0.0784754
Rars1	0.795	-0.330973	0.0902157
Rps20	0.802	-0.318326	0.038811
H2bc3	0.811	-0.302226	0.0204214
H4c1; H4c11; H4c12; H4c14; H4c16; H4c2; H4c3; H4c4; H4c6; H4c8; H4c9; Hist1h4m	0.813	-0.298673	0.0235597
Marcks	0.827	-0.274041	0.0596781
Psd3	0.828	-0.272297	0.0810615
HBA	1.201	0.264236	0.0456432
Prdx3	1.202	0.265437	0.0453047
Prdx5	1.202	0.265437	0.0442901
Ndufb10	1.204	0.267835	0.0736302
Diaph1	1.208	0.27262	0.0443775
Eno2	1.21	0.275007	0.033635
Gstm1	1.21	0.275007	0.0337852
Gstp1	1.21	0.275007	0.0334832
Sirt2	1.21	0.275007	0.0335755
Sdhc	1.216	0.282143	0.0796612
Atp5pb	1.219	0.285698	0.0236203
Ncald	1.221	0.288063	0.0355606
Akr1b3	1.224	0.291604	0.0538974
Tpm3	1.229	0.297485	0.0164832
Nipsnap2	1.23	0.298658	0.0587616
Pcmt1	1.23	0.298658	0.0594717
Psma5	1.231	0.299831	0.0565202
Ctbp1	1.232	0.301002	0.0442063
Cox4i1	1.235	0.304511	0.0127568
Nipsnap1	1.239	0.309176	0.0106237
Cplx1	1.24	0.31034	0.0458213
Ndufb8	1.242	0.312665	0.0501179
Clta	1.247	0.318461	0.0179027
Slc44a1	1.249	0.320773	0.0312201
Hpca	1.253	0.325386	0.0065414
Gm5157	1.254	0.326537	0.0397
Anxa5	1.255	0.327687	0.0127843
Atp6v0d1	1.257	0.329985	0.00780992
COX1	1.261	0.334568	0.0195639
Vsnl1	1.265	0.339137	0.00380811
Cox5b	1.268	0.342555	0.0190911
Arpc3	1.271	0.345964	0.0671128
Lypla2	1.275	0.350497	0.0803098
Csl	1.276	0.351628	0.0828337
Calb1	1.277	0.352759	0.0827561
Ywhaz	1.279	0.355016	0.00204843
Napb	1.281	0.35727	0.00188283
Uchl1	1.283	0.359521	0.00174481
Mgst3	1.284	0.360645	0.00949272
Ywhag	1.289	0.366252	0.00127235
Ywhae	1.29	0.367371	0.00124098
Calb2	1.293	0.370722	0.0131149
Ak3	1.294	0.371838	0.0936467
Auh	1.295	0.372952	0.00923463
Ppp2ca	1.295	0.372952	0.0630603
Hpcal4	1.297	0.375178	0.000818946
Cstb	1.298	0.37629	0.0600631
Gdap1	1.305	0.38405	0.0453964
Psmd8	1.31	0.389567	0.0938589
Ywhah	1.312	0.391768	0.000450004
Psmb2	1.319	0.399445	0.0531886
Cox6b1	1.32	0.400538	0.000525441
Echs1	1.325	0.405992	0.00217621
Napa	1.325	0.405992	0.0347454
Hbb-bs	1.328	0.409255	0.000194138
Snrpd2	1.33	0.411426	0.0718206
H3-3a; H3-3b	1.331	0.412511	0.0792732
Ndufs3	1.331	0.412511	0.000817209
Mtx2	1.336	0.41792	0.00464015
Atp6v1d	1.338	0.420078	0.000135714
Gstm5	1.341	0.423309	0.000587471
Acyp1	1.348	0.43082	0.0111361
S100a1	1.348	0.43082	0.0784754
Tmem126a	1.352	0.435095	0.0605931
Efhd2	1.355	0.438293	0.000130138
Acot13	1.361	0.444667	0.00761634
Ndufab1	1.37	0.454176	0.0418129
Ppp3r1	1.371	0.455229	2e-05
Cep170b	1.372	0.45628	0.0405677
Cab39	1.374	0.458382	0.00749862
Pgam1	1.374	0.458382	1.78e-05
Erp29	1.384	0.468844	0.0303902
Nt5c	1.384	0.468844	0.0960373
Stxbp5l	1.384	0.468844	0.0056588
Ywhab	1.391	0.476122	6.85e-06
Nrgn	1.395	0.480265	0.00662338
Apoo	1.41	0.495695	4.81e-06
Kalrn	1.41	0.495695	0.0785658
Atp6v1f	1.416	0.501821	0.0142181
Macrod2	1.418	0.503858	0.0636376
Apoe	1.434	0.520045	3.2e-05
Tpm1	1.451	0.537048	3.72e-06
Mcts1	1.454	0.540027	0.0414939
Mboat7	1.456	0.54201	0.0472195
Coq6	1.457	0.543001	0.0998951
Cox5a	1.458	0.543991	1.22e-07
Spast	1.477	0.56267	0.0056588
Ptpn23	1.486	0.571434	0.000347828
Pten	1.487	0.572405	0.00102431
Ddc	1.492	0.577248	0.0376104
Dbi	1.5	0.584963	0.000621586
Hebp1	1.502	0.586885	2.09e-07
Calm2	1.514	0.598365	3.39e-09
Cox6a1	1.516	0.60027	3.01e-09
Penk	1.518	0.602172	0.0976088
Tmod2	1.526	0.609755	2.17e-05
Kcnj3	1.548	0.630405	0.0636376
Cox6c	1.551	0.633199	0.005484
Sestd1	1.551	0.633199	0.0965952
Fis1	1.555	0.636915	0.0474691
Cisd1	1.566	0.647084	5.25e-09
Sh3bgrl3	1.574	0.654436	0.00230371
Prkcd	1.581	0.660837	0.0423162
Atp5f1e	1.588	0.667211	1.02e-08
Vdac3	1.599	0.67717	0.0612932
KRT14	1.611	0.687956	0.00608347
Cygb	1.633	0.707525	0.0518729
Rtn4	1.647	0.719841	0.0280896
Tmsb4x	1.671	0.740712	4.73e-07
Guk1	1.676	0.745022	0.00387121
Tsnax	1.677	0.745883	0.00270772
Chrm1	1.685	0.752749	0.0551665
Atp5k	1.687	0.75446	8.5e-07
Nell2	1.69	0.757023	0.0106452
Tubb2b	1.69	0.757023	3.42e-11
Septin5	1.691	0.757877	0.00356294
Erh	1.709	0.773152	0.00074945
Ndufb1	1.709	0.773152	0.0331675
RTRAF	1.712	0.775683	0.00670537
Pea15	1.728	0.789103	3.24e-06
Uqcrb	1.732	0.792439	3.02e-12
Syt5	1.754	0.810649	3.04e-08
Wdr54	1.763	0.818032	0.000729793
Rpl22l1	1.772	0.825379	0.0117714
Atp5pf	1.773	0.826193	8.31e-10
Ndufb6	1.775	0.827819	7.14e-05
ATP6	1.803	0.850399	6.49e-05
S100b	1.83	0.871844	2.96e-06
Cdc42bpa	1.846	0.884403	0.0509017
Arhgef25	1.859	0.894527	0.0905738
Prxl2b	1.867	0.900722	0.000304386
Chmp2a	1.868	0.901494	0.0671128
Gdpd1	1.884	0.913799	0.0217855
Themis2	1.901	0.926759	1.07e-07
Homer3	1.939	0.955313	0.0222782
Cwc15	1.944	0.959028	0.0397
Skic8	1.954	0.96643	0.0497804
Cdk14	1.959	0.970117	0.00518246
Iba57	2.01	1.0072	1.61e-05
Chp1	2.046	1.03281	0.000370812
Nnt	2.054	1.03844	5.4e-12
Vps16	2.073	1.05172	4.08e-06
Scyl1	2.105	1.07382	0.0214176
Slc24a2	2.181	1.12499	0.0131029
Rragb	2.211	1.1447	1.52e-06
Dr1	2.267	1.18078	0.0190711
Pcbp2	2.295	1.19849	0.000545981
Ncoa6	2.296	1.19912	0.00188283
Atad1	2.343	1.22836	8.44e-05
Mpc1	2.367	1.24306	0.00770865
HRNR	2.423	1.27679	0.0911015
Grpel1	2.448	1.2916	9.76e-09
Stxbp1	2.46	1.29866	1.04e-10
Ap3s2	2.545	1.34767	3.72e-07
Tomm22	2.584	1.36961	2.93e-16
Lars2	2.621	1.39012	0.00754595
Nemf	2.641	1.40108	1.71e-05
Fam210a	2.693	1.42921	0.0161082
Dennd10	2.758	1.46362	0.00268989
Tmem68	2.8	1.48543	0.0233663
Tgfb1i1	3.085	1.62527	6.07e-11
Trappc13	3.318	1.73031	0.000414752
Atp5mc1	4.031	2.01114	7.94e-13
Armt1	4.188	2.06626	4.48e-05
Tbc1d15	7.305	2.86888	1.51e-13
Fxyd1	10.043	3.32812	2.93e-16
Kif20b	13.312	3.73466	2.93e-16
Akt2	100	6.64386	2.93e-16
Anxa1	100	6.64386	2.93e-16
Cacng2	100	6.64386	2.93e-16
Cutc	100	6.64386	2.93e-16
Dmac2l	100	6.64386	2.93e-16
Eef1d	100	6.64386	2.93e-16
Git2	100	6.64386	2.93e-16
H2az2	100	6.64386	2.93e-16
Mrps34	100	6.64386	2.93e-16
Niban2	100	6.64386	2.93e-16
Plscr3	100	6.64386	2.93e-16
Rasgrp1	100	6.64386	2.93e-16
Sfxn4	100	6.64386	2.93e-16
Syngap1	100	6.64386	2.93e-16
Timm13	100	6.64386	2.93e-16
Trnt1	100	6.64386	2.93e-16
Wdr20rt	100	6.64386	2.93e-16

## Sheet: HPC PTE+ v PTE-
Gene_Symbol	Abundance Ratio: (ctx, pte plus) / (ctx, pte minus)	Log2FC	padj
Tbc1d8b	0.01	-6.64386	2.67e-16
Daam2	0.01	-6.64386	2.67e-16
Eva1a	0.01	-6.64386	2.67e-16
Vps41	0.01	-6.64386	2.67e-16
2410002F23Rik	0.01	-6.64386	2.67e-16
Kbtbd2	0.01	-6.64386	2.67e-16
Acsl5	0.01	-6.64386	2.67e-16
Cnnm3	0.01	-6.64386	2.67e-16
Wdr11	0.01	-6.64386	2.67e-16
Cxnp1	0.01	-6.64386	2.67e-16
Grid2	0.01	-6.64386	2.67e-16
Tmem68	0.01	-6.64386	2.67e-16
Hid1	0.01	-6.64386	2.67e-16
Nrp1	0.01	-6.64386	2.67e-16
Ace	0.01	-6.64386	2.67e-16
Sema4a	0.094	-3.4112	2.67e-16
Fxyd1	0.128	-2.96578	2.67e-16
Kng1	0.213	-2.23107	1.67e-05
Sh2b1	0.278	-1.84684	5.42e-10
Prdx4	0.305	-1.71312	1.08e-12
Rap1a	0.308	-1.699	1.44e-08
Ndufv3	0.379	-1.39973	2.55e-06
Gcdh	0.416	-1.26534	4.39e-05
Rab15	0.433	-1.20756	0.0303561
Kcnn2	0.446	-1.16488	0.0100355
Cdc42bpa	0.484	-1.04692	0.0014364
Ghitm	0.486	-1.04097	0.00147247
Eef1d	0.533	-0.907793	0.00141033
Acsf3	0.558	-0.841663	0.0632763
S100a9	0.563	-0.828793	0.0127454
Epn2	0.569	-0.813499	0.000237241
Smarcc1	0.572	-0.805913	0.00502016
Ap3s2	0.573	-0.803393	0.0237743
Shd	0.578	-0.790859	5.14e-12
Hnrnpk	0.592	-0.756331	2.28e-06
Arfgap2	0.594	-0.751465	0.031851
Syne1	0.595	-0.749038	0.0340183
Syt5	0.604	-0.72738	8.9e-09
Mbnl1	0.606	-0.72261	0.0192673
Thada	0.608	-0.717857	1.12e-08
Igkc	0.62	-0.68966	0.0045414
Creld1	0.621	-0.687335	6.82e-05
Rab2a	0.625	-0.678072	0.0616242
Ddi2	0.626	-0.675765	0.0966777
Scai	0.627	-0.673463	0.0130349
Igh	0.634	-0.657445	0.000181097
Cpeb2	0.642	-0.639355	0.0877121
Tuft1	0.653	-0.614845	0.00329791
Gm5409	0.668	-0.58208	4.91e-08
Ddc	0.673	-0.571322	0.0550241
D430041D05Rik	0.683	-0.550043	0.0661682
Serpina3k	0.686	-0.54372	3.68e-06
Ttr	0.689	-0.537424	1.33e-06
Rpl35	0.699	-0.516636	2.34e-06
Crtc1	0.714	-0.486004	0.0160174
Dazap1	0.723	-0.467932	0.00481795
H2ac20	0.724	-0.465938	0.0124313
Dip2b	0.729	-0.456009	0.00502225
Jam3	0.733	-0.448115	0.015624
Id4	0.74	-0.434403	0.00760897
Mpc1	0.741	-0.432455	0.0162382
Scamp2	0.743	-0.428566	0.0589506
Septin7	0.743	-0.428566	0.000512606
Septin10	0.745	-0.424688	0.00581837
Fga	0.749	-0.416962	0.0543811
Emb	0.751	-0.413115	0.093023
Fxyd7	0.767	-0.382702	0.00644202
Csnk1d	0.769	-0.378944	0.0229208
Mblac2	0.783	-0.352916	0.00193042
Fabp7	0.79	-0.340075	0.0233731
Marcks	0.791	-0.33825	0.00244668
Acly	0.804	-0.314733	0.0538022
Pzp	0.81	-0.304006	0.00824908
Prss3b	0.818	-0.289827	0.0192673
Alb	0.822	-0.28279	0.00323707
Tigd2	0.827	-0.274041	0.0155322
Aspa	0.828	-0.272297	0.0439536
Phpt1	0.83	-0.268817	0.095712
Rps25	0.83	-0.268817	0.00575721
Hbb-bs	1.247	0.318461	0.0129745
Mapk1	1.253	0.325386	0.0103125
Gapvd1	1.253	0.325386	0.0765024
Prss3	1.262	0.335712	0.00669074
Pcmt1	1.263	0.336855	0.0825375
ND1	1.265	0.339137	0.0438215
Map1lc3a	1.266	0.340277	0.0472475
Sdhc	1.268	0.342555	0.0493518
Gnao1	1.268	0.342555	0.0395807
Me3	1.268	0.342555	0.0361605
Ptpn9	1.272	0.347099	0.0044557
Tppp3	1.274	0.349365	0.0277203
Olfm1	1.281	0.35727	0.00914422
Plpp3	1.284	0.360645	0.0343399
Ptms	1.289	0.366252	0.0361605
Hmgcl	1.294	0.371838	0.0214853
Diaph1	1.297	0.375178	0.00128737
Bicd1	1.3	0.378512	0.0589506
Cox6a1	1.307	0.386259	0.0056996
Csl	1.311	0.390668	0.0438215
Enoph1	1.315	0.395063	0.0649508
KRT77	1.325	0.405992	0.00924816
Prepl	1.327	0.408168	0.0302682
Dynlt3	1.329	0.410341	0.0139619
Atp4a	1.333	0.414677	0.0658973
Slc22a1	1.342	0.424385	0.00412064
Cops4	1.349	0.43189	0.0862196
Tubal3	1.35	0.432959	0.016348
Atp5mk	1.365	0.448901	0.000703211
Gm5157	1.372	0.45628	0.00172777
ND4	1.379	0.463622	0.0669427
Psmd8	1.382	0.466758	0.0641629
Ogdh	1.385	0.469886	0.0757867
Timm50	1.387	0.471968	0.0710217
Nd5	1.392	0.477159	0.0129745
Stk24	1.395	0.480265	0.0244124
H3c13; H3c14; H3c15; H3c2; H3c3; H3c4; H3c6; H3c7	1.399	0.484396	3.58e-06
Gsta4	1.403	0.488515	0.0554324
Sar1a	1.412	0.49774	0.0501294
Asphd2	1.416	0.501821	0.0162033
Kcna2	1.418	0.503858	0.0452713
Mtx2	1.423	0.508936	0.00717314
Atp6v0c	1.423	0.508936	7.31e-07
Cops8	1.439	0.525067	0.097679
Snrpd2	1.449	0.535058	0.0228035
Atp2b1	1.45	0.536053	0.0133629
Mgst3	1.462	0.547943	1.79e-05
Coq6	1.465	0.550901	0.0530809
KRT10	1.469	0.554834	3.16e-08
Pgk1	1.499	0.584	0.0392075
Echs1	1.503	0.587845	4.43e-06
Vcl	1.506	0.590722	0.00874533
Ube2d3	1.517	0.601221	0.0304158
Scn8a	1.539	0.621993	0.0152955
Uqcrb	1.553	0.635058	0.00206475
KRT1	1.554	0.635987	6.36e-11
Ak9	1.588	0.667211	0.036799
Loxhd1	1.62	0.695994	2.32e-07
Apoo	1.621	0.696884	9.08e-12
Ryr2	1.625	0.70044	0.0438215
Mtco2	1.634	0.708408	9.2e-09
KRT9	1.637	0.711054	9.42e-14
Nnt	1.662	0.73292	2.86e-06
Pten	1.666	0.736388	0.00116488
COX1	1.676	0.745022	1.72e-08
Ank2	1.678	0.746743	0.0593189
Dctn5	1.688	0.755315	0.0717243
Myh11	1.698	0.763836	0.0278922
Slc1a2	1.726	0.787432	0.082509
Crnkl1	1.736	0.795767	2.67e-16
Vdac3	1.739	0.798258	0.0961958
Ptpn23	1.746	0.804054	3.33e-06
Homer3	1.787	0.83754	0.0207293
Kif20b	1.794	0.84318	0.000842447
Selenot	1.804	0.851199	0.0550732
Tom1	1.807	0.853597	0.000474252
Aldoart1	1.839	0.878921	3.22e-12
Cdkl5	1.857	0.892974	0.000128129
Gpc6	1.858	0.893751	0.0289476
Vps16	1.865	0.899176	0.0397842
Pea15	1.885	0.914565	0.0287873
Usp15	1.896	0.922959	0.0261821
Adgrb3	1.919	0.940355	0.0238776
Limch1	1.92	0.941106	0.0853156
Aip	1.977	0.983313	0.0179829
Dcakd	1.992	0.994218	0.0971253
Tubb2b	2.03	1.02148	2.67e-16
Gnpda2	2.033	1.02361	0.000148991
Anxa2	2.064	1.04544	0.00830417
Nwd2	2.097	1.06833	0.0589506
Rptor	2.115	1.08066	0.0045941
H1f5	2.129	1.09018	8.3e-05
Trappc1	2.137	1.09559	2.67e-16
Krt90	2.161	1.1117	2.67e-16
Cpd	2.176	1.12168	0.0653685
Arvcf	2.231	1.15769	0.0296572
Rpl22l1	2.234	1.15963	0.00335134
Hist1h3i	2.236	1.16092	0.0353069
H3-3a; H3-3b	2.241	1.16414	2.09e-12
Dock9	2.249	1.16928	0.0256566
Reps1	2.277	1.18713	0.00502016
Armc8	2.283	1.19093	0.0815356
Sestd1	2.321	1.21475	0.000526555
Zfp91	2.441	1.28747	0.0282792
Tm9sf3	2.505	1.32481	7.73e-05
5730455P16Rik	2.51	1.32769	0.000352684
Ncoa5	2.521	1.334	7.71e-05
Chmp6	2.53	1.33914	0.00025804
Ppp6r3	2.614	1.38626	0.0229208
Stxbp1	2.701	1.43349	1.29e-06
Dyrk1a	2.731	1.44943	0.0634619
Serpina3k	2.756	1.46258	1.77e-05
Svop	2.766	1.4678	1.35e-09
Zbtb18	2.79	1.48027	0.00299337
Erp29	2.79	1.48027	1.84e-09
Trappc14	2.792	1.4813	0.00239543
ND2	2.827	1.49927	3.08e-06
Ncoa6	2.843	1.50741	0.00553154
Rtn3	2.9	1.53605	0.000563786
Scyl1	3.019	1.59407	0.00437657
Dip2a	3.128	1.64524	0.0260065
Nudt2	3.136	1.64893	0.00136402
Rsu1	3.162	1.66084	0.0382435
Mtx1	3.177	1.66767	1.12e-07
Rnf20	3.281	1.71414	0.0043764
Naga	3.307	1.72552	0.00987628
Fnbp1	3.451	1.78701	6.11e-09
Pcbp2	3.452	1.78743	0.00015917
Sh2d5	3.597	1.84679	7.88e-06
Atg9a	3.619	1.85559	1.13e-05
Ogfod1	3.772	1.91533	0.00450133
Ttbk1	3.885	1.95791	0.00347311
Fam210a	4.098	2.03492	0.00153238
Slc24a2	4.124	2.04404	6.18e-07
Gmpr2	4.153	2.05415	0.00038829
Wdr4	4.512	2.17377	2.67e-16
Tmed4	5.201	2.37879	0.000238172
Armt1	5.456	2.44784	4.76e-05
Ndufb4	5.984	2.58111	2.67e-16
Chmp2b	6.516	2.70399	3.46e-06
Atp5mc1	11.202	3.48568	2.67e-16
Cap2	26.059	4.70371	2.67e-16
Fxr1	100	6.64386	2.67e-16
Pacs1	100	6.64386	2.67e-16
Micos10	100	6.64386	2.67e-16
Rlbp1	100	6.64386	2.67e-16
Arhgdib	100	6.64386	2.67e-16
Fdxr	100	6.64386	2.67e-16
Kctd8	100	6.64386	2.67e-16
Trip12	100	6.64386	2.67e-16
Mlc1	100	6.64386	2.67e-16
Ikbkb	100	6.64386	2.67e-16
Samhd1	100	6.64386	2.67e-16
Gipc1	100	6.64386	2.67e-16
Atp5pf	100	6.64386	2.67e-16
Chp1	100	6.64386	2.67e-16
Tbc1d15	100	6.64386	2.67e-16
Sipa1l3	100	6.64386	2.67e-16
Celf2	100	6.64386	2.67e-16
Retreg3	100	6.64386	2.67e-16
Cars2	100	6.64386	2.67e-16
